# Supplementary material for: Examining power dynamics in global health governance using topic modeling and network analysis of Twitter data
Source: PubMed Central journal article supplement — BMJ Open. 2022 Jun 6;12(6):e054470. doi: 10.1136/bmjopen-2021-054470 (PMC9171232; doi:10.1136/bmjopen-2021-054470), 2022-06-06
Supplement: bmjopen-2021-054470.draft_revisions.pdf [file bmjopen-2021-054470.draft_revisions.pdf]

# BMJ Open

BMJ Open is committed to open peer review. As part of this commitment we make the peer review history of every article we publish publicly available.

When an article is published we post the peer reviewers' comments and the authors' responses online. We also post the versions of the paper that were used during peer review. These are the versions that the peer review comments apply to.

The versions of the paper that follow are the versions that were submitted during the peer review process. They are not the versions of record or the final published versions. They should not be cited or distributed as the published version of this manuscript.

BMJ Open is an open access journal and the full, final, typeset and author-corrected version of record of the manuscript is available on our site with no access controls, subscription charges or pay-per-view fees (<http://bmjopen.bmj.com>).

If you have any questions on BMJ Open's open peer review process please email [info.bmjopen@bmj.com](mailto:info.bmjopen@bmj.com)

# BMJ Open

## Revealing priorities and power asymmetries in global health governance using twitter data

|                               |                                                                                                                                                                                                                                                                                                 |
|-------------------------------|-------------------------------------------------------------------------------------------------------------------------------------------------------------------------------------------------------------------------------------------------------------------------------------------------|
| Journal:                      | <i>BMJ Open</i>                                                                                                                                                                                                                                                                                 |
| Manuscript ID                 | bmjopen-2021-054470                                                                                                                                                                                                                                                                             |
| Article Type:                 | Original research                                                                                                                                                                                                                                                                               |
| Date Submitted by the Author: | 22-Jun-2021                                                                                                                                                                                                                                                                                     |
| Complete List of Authors:     | Bermudez, Gian Franco; University of Pennsylvania, School of Social Policy and Practice<br>Prah, Jennifer; University of Pennsylvania, School of Social Policy and Practice                                                                                                                     |
| Keywords:                     | Health policy < HEALTH SERVICES ADMINISTRATION & MANAGEMENT, International health services < HEALTH SERVICES ADMINISTRATION & MANAGEMENT, Public health < INFECTIOUS DISEASES, Information technology < BIOTECHNOLOGY & BIOINFORMATICS, Rationing < HEALTH SERVICES ADMINISTRATION & MANAGEMENT |
|                               |                                                                                                                                                                                                                                                                                                 |

SCHOLARONE™  
Manuscripts

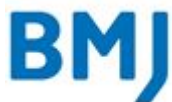

I, the Submitting Author has the right to grant and does grant on behalf of all authors of the Work (as defined in the below author licence), an exclusive licence and/or a non-exclusive licence for contributions from authors who are: i) UK Crown employees; ii) where BMJ has agreed a CC-BY licence shall apply, and/or iii) in accordance with the terms applicable for US Federal Government officers or employees acting as part of their official duties; on a worldwide, perpetual, irrevocable, royalty-free basis to BMJ Publishing Group Ltd ("BMJ") its licensees and where the relevant Journal is co-owned by BMJ to the co-owners of the Journal, to publish the Work in this journal and any other BMJ products and to exploit all rights, as set out in our [licence](#).

The Submitting Author accepts and understands that any supply made under these terms is made by BMJ to the Submitting Author unless you are acting as an employee on behalf of your employer or a postgraduate student of an affiliated institution which is paying any applicable article publishing charge ("APC") for Open Access articles. Where the Submitting Author wishes to make the Work available on an Open Access basis (and intends to pay the relevant APC), the terms of reuse of such Open Access shall be governed by a Creative Commons licence – details of these licences and which [Creative Commons](#) licence will apply to this Work are set out in our licence referred to above.

Other than as permitted in any relevant BMJ Author's Self Archiving Policies, I confirm this Work has not been accepted for publication elsewhere, is not being considered for publication elsewhere and does not duplicate material already published. I confirm all authors consent to publication of this Work and authorise the granting of this licence.

1  
2  
3  
4 **Title:** Revealing priorities and power asymmetries in global health  
5 governance using twitter data  
6  
7

8 **Authors:** Gian Franco Bermudez<sup>1</sup>, Jennifer Prah Ruger<sup>2</sup>  
9

10 **Affiliations:**  
11

12  
13 <sup>1</sup>University of Pennsylvania, School of Social Policy and Practice, Philadelphia,  
14 Pennsylvania, United States  
15

16 <sup>2</sup>University of Pennsylvania, School of Social Policy and Practice and Perelman School  
17 of Medicine, Philadelphia, Pennsylvania, United States  
18

19 **Correspondence to:**  
20

21 Dr. Jennifer Prah Ruger

22 Email: jenpr@upenn.edu

23 Address: 3701 Locust Walk, Caster Building, D-4, Philadelphia, PA 19104-6214

24 Office Phone: +1-215-746-1330  
25  
26

27 **Keywords:** Health policy, international health services, public health, information  
28 technology, rationing  
29

30 **Word Count:** 3,946  
31  
32  
33  
34  
35  
36  
37  
38  
39  
40  
41  
42  
43  
44  
45  
46  
47  
48  
49  
50  
51  
52  
53  
54  
55  
56  
57  
58  
59  
60

## Structured Abstract:

**Objectives:** Despite increases in global health actors and funding levels, health inequities persist. We empirically tested whether global health governance (GHG) operates under the Rational Actor Model (RAM) and characterized GHG power dynamics.

**Design:** We collected approximately 75,000 tweets of 20 key global health actors, between 2016 and 2020 using Twitter API. We generated priorities from tweets collected using a topic modeling algorithm. Priorities from tweets were compared with stated priorities from content analyses of policy documents and with revealed priorities from network analyses of development assistance for health (DAH) funding data. Comparing priorities derived from Twitter, policy documents, and DAH funding data, we are able to test if GHG operates under RAM and to characterize power dynamics in GHG.

**Participants:** 20 key global health actors were identified based on consensus of 3 peer-reviewed articles mapping global health networks. All tweets of global health actors were collected in three-month intervals from November 2016 to May 2020. Policy documents and DAH financial data for each actor were collected for the same time period.

**Results:** We find all 20 actors and the global health system collectively fulfill the 3 conditions of RAM based on stated and revealed priorities. We also find compulsory and institutional power asymmetries in GHG. Funding organizations have compulsory power over channels of DAH and implementing institutions they directly fund. Funding organizations also have transitive influence over implementing institutions receiving DAH funding.

**Conclusions:** GHG operates under RAM, the rational choice for all actors is to align their priorities with the priorities of wealthy funding organizations. Priorities of the entire global health system are determined by the priorities of wealthy funding organizations that have compulsory and institutional power over other actors. If health inequities are to be addressed, a reassessment of current global health governance is imperative.

## Strengths and limitations of this study:

- This study utilizes an alternative methodology of using Twitter data in understanding global health governance and priority-setting.
- This study triangulates findings from multiple data sources to test the rational actor model and power asymmetries in global health governance.
- Because the scope of this study is from 2016 to 2020, the findings may not be fully representative of global health governance during the COVID-19 pandemic.
- Only the key 20 actors of the hundreds of global health actors today were included in the study.

## INTRODUCTION

The turn of the 21st century introduced an unprecedented volume of new public and private actors in global health accompanied by stratospheric levels of funding.[1] While some argue that this multiplicity of new actors promotes cooperation, what persists is a politically fragmented network of actors with competing priorities and preferences.[2–4] Academics studying the complex network of global health actors have described it as a “congested” and “chaotic” network that causes inefficiencies in the practice and delivery of global health programs and aid.[5]

Inequities in global health have increasingly been attributed to the actions of transnational actors with varying degrees of power and divergent interests.[6] While more actors have entered global health with ostensible benevolent purposes, health inequities and inefficiencies in delivery still exist today. Fierce competition among donor priorities and requirements overwhelms the institutional capacities of recipient countries,[7,8] disrupts national health planning,[9] delays the delivery of aid,[10] and creates duplications and resource waste.[11,12]

Paradoxically, the increase in global health actors and funding has exacerbated inequities and inefficiencies in global health. Researchers have presented arguments explaining this paradox through the lens of economics, politics, and power.

The current global health governance (GHG) has been theorized as operating under the rational actor model (RAM) where “each actor has its own set of goals and objectives, and these actors take actions based on analysis of the costs and benefits of various available options.”[13] Current GHG based on the RAM fails to “justify an obligation to help meet the health needs of others.”[13]

The Lancet-University of Oslo Commission on Global Governance for Health (2014) argues that “power asymmetry and global social norms limit the range of choice and constrain action on health inequity.”[6] The actions of powerful global actors in pursuit of their own interests “are not designed to harm health but can have negative side-effects that create health inequities.”[6]

The explanations by the Commission on Global Governance for Health and the hypothesis that GHG operates under the RAM are conceptual ideas about the behaviors of global health actors founded on a collection of studies within specific nations, regions, or institutions. What is necessary is empirical evidence at the global level that can confirm, deny or recharacterize these characterizations of how global health currently operates. Empirical evidence at the global level eliminates doubts of how decisions are currently made in global health and can guide GHG towards addressing the world’s inequities in health.

We aim to empirically test the following research questions at the global level: (1) does GHG operate under the RAM? and (2) how can we characterize power dynamics in GHG?

We hypothesize that GHG operates under RAM and that there are power asymmetries in GHG that limit the range of health priorities as presented by the Commission on Global Governance for Health. This study analyzed empirical evidence from Twitter,

funding data, and policy documents at the global level to test whether GHG operates under RAM and to characterize the power dynamics in GHG.

## METHODS

We test if GHG operates under the RAM and characterize the power dynamics in GHG through the lens of global health priority-setting. All global health actors have certain preferences for health issues and act in alignment with these priorities.

Priorities can either be stated or revealed. Stated priorities are those preferences explicitly stated in a health actor's official documents or websites. For example, the first article in the constitution of the World Health Organization (WHO) states: "the objective of the [WHO] shall be the attainment by all peoples of the highest possible level of health."<sup>[14]</sup> The attainment of highest possible level of health by all is the WHO's stated priority. Revealed priorities are preferences that are gleaned from records of past behaviors and choices such as health funding allocations and accounts of actually implemented programs and policies. Revealed priorities may or may not be aligned with stated priorities. For example, the WHO has annual financial reports that break down how much each health area or issue is funded in proportion of their total budget. The most allocated health areas are the revealed priorities of the WHO.

We use evidence for both stated and revealed priorities from 2016 to 2020 to test both of our research questions.

### Study Sample

In this study, we identified 20 key global health actors based on a consensus among three past studies that mapped the global health network using quantitative and qualitative methodologies.<sup>[4,15,16]</sup> As shown in Table 1, the key global health actors were categorized based on their nature of work in global health. Global health actors were either funding organizations, channels of developmental assistance for health (DAH) or implementing institutions. While most actors fall into more than one of these categories in practice, for the integrity of this analysis, organizations were limited to only one category based on the nature of their main line of work.

**Table 1. Summary of Global Health Actors.** Characteristics of the 20 global health actors analyzed in this study.

| Nature of Work in Global Health                 | Organizational Category       | Twitter Username                        | Global Health Actor                                               |
|-------------------------------------------------|-------------------------------|-----------------------------------------|-------------------------------------------------------------------|
| Channels of Developmental Assistance for Health | Global health initiative      | gavi                                    | Gavi, the Vaccine Alliance                                        |
|                                                 |                               | UNITAID                                 | Unitaid                                                           |
|                                                 |                               | GlobalFund                              | Global Fund to Fight AIDS, Tuberculosis and Malaria               |
|                                                 | Multilateral Development Bank | WorldBank                               | World Bank                                                        |
|                                                 | United Nations System         | WHO                                     | World Health Organization                                         |
|                                                 |                               | UNAIDS                                  | Joint United Nations Programme on HIV/AIDS (UNAIDS)               |
|                                                 |                               | UNFPA                                   | United Nations Population Fund (UNFPA)                            |
| UNICEF                                          |                               | United Nations Children's Fund (UNICEF) |                                                                   |
| Funding Organizations                           | National Government           | USAID                                   | United States Agency for International Development (USAID)        |
|                                                 |                               | DFID_UK                                 | United Kingdom Department for International Development (UK DFID) |

|                           |                            |                 |                                                           |
|---------------------------|----------------------------|-----------------|-----------------------------------------------------------|
| Implementing Institutions | Philanthropic Organization | gatesfoundation | Bill and Melinda Gates Foundation                         |
|                           | Global CSO/NGO             | MSF             | Doctors Without Borders (MSF)                             |
|                           |                            | PATHtweets      | PATH                                                      |
|                           |                            | SavetheChildren | Save the Children                                         |
|                           |                            | Oxfam           | Oxfam International                                       |
|                           | United Nations System      | FAO             | Food and Agriculture Organization (FAO)                   |
|                           |                            | UNDP            | United Nations Development Programme (UNDP)               |
|                           | National Government        | CDCgov          | Centers for Disease Control and Prevention (CDC)          |
|                           |                            | ECDC_EU         | European Centre for Disease Prevention and Control (ECDC) |
|                           |                            | NIH             | National Institutes of Health (NIH)                       |

## Patient and public involvement

Patients and the public were not involved in the development of the research questions and outcome measures.

## Data Sources

We analyze stated and revealed priorities of 20 key global health actors from three data sources – policy documents, DAH funding data, and tweets. As summarized in Table 2, stated priorities are obtained from a manual content analysis of policy documents, annual reports, and official websites of global health actors. Revealed priorities are derived using a network analysis and descriptive statistics of financial flows in DAH funding data. To obtain the revealed priorities of each global health actor, we use topic modeling in natural language processing (NLP) and a network analysis of the tweets of each global health actor. Further explanation of data collection from each source follows.

**Table 2. Summary of Data Source, Collection, and Analysis.** Description of how data is collected and analyzed in the study.

| Data Source      | Data Collection                                                                                                                       | Analysis                                                       | Type of Priorities Derived from Source |
|------------------|---------------------------------------------------------------------------------------------------------------------------------------|----------------------------------------------------------------|----------------------------------------|
| Policy Documents | Manual collection of annual reports, policy documents, and official communications from official websites of each global health actor | Manual content analysis                                        | Stated                                 |
| DAH Funding Data | Queried funding allocation data of each global health actor from the International Health Metrics and Evaluation (IHME) DAH Database  | Descriptive statistics; network analysis                       | Revealed                               |
| Twitter Data     | Collected all the tweets of each global health actor from November 2016 to May 2020 in three month intervals using the Twitter API    | Natural language processing (topic modeling); network analysis | Revealed                               |

## Drawing stated priorities from policy documents

Available policy documents, annual reports, and relevant official communications from the websites of each global health actor within the timeframe of the study were collected. Documents not published between 2016 and 2020 were not collected. Manual content analysis was conducted to evaluate the available policy documents for each global health actor and identify their respective stated priorities.



1  
2  
3 The stated priorities drawn from these documents were commonly obtained from official  
4 statements that fall under the following headings: “strategic priorities,” “program  
5 priorities,” “strategic objectives,” “focus areas,” “strategic work areas,” “program focus,”  
6 “Strategy 20XX-20XX,” “strategic goals,” “priority areas,” among others. The first column  
7 of Supplementary Table 1 contains the stated priorities obtained from each actor.  
8

### 9 **Deriving revealed priorities from funding data**

10  
11 Data from the Institute for Health Metrics and Evaluation’s (IHME) Developmental  
12 Assistance for Health Database was collected for 2019.[17] The database includes  
13 approximately 800,000 transactions of financing for health programs and aid from  
14 funding organizations to channels of DAH and to implementing countries.  
15

16 Descriptive statistics were conducted to determine the allocations of funding for each  
17 health area and geographic region for the 20 global health actors in 2019.  
18

19 Network analysis was conducted to observe the funding relationships between global  
20 health actors. Gephi 0.9.2 was used in constructing and analyzing the network map.  
21 The network modelled in the study allows for a graphical visualization of the flows of  
22 global health funding in 2019. The network map was designed such that each global  
23 health actor is represented by a node and lines or “edges” indicate a flow of funding in  
24 global health. The Fruchterman-Reingold algorithm was used in modelling the network  
25 map. The algorithm “calculates the optimal layout so that nodes with less strength and  
26 less connections are placed further apart, and those with more and/or stronger  
27 connections are placed closer to each other.”[18] The thickness of edges represents the  
28 amount of funding transferred between actors. The modelled network map can be found  
29 and will be discussed in the findings section.  
30  
31

### 32 **Twitter data**

33  
34 Using the Twitter API, we collected all the tweets of each global health actor by  
35 username from November 2016 to May 2020 in three month intervals. This means that  
36 all the tweets of each global health actor were collected for each day in the months of  
37 February, May, August, and November for each year. An interval of three months was  
38 decided for two reasons. First, a variation in the issues, topics, and themes that global  
39 health actors tweet can be observed in three month intervals. Initial small sample testing  
40 indicates that collecting all the tweets of every month for each actor yields redundancy  
41 in issues and topics observed. Redundancy is eliminated in three month intervals.  
42 Second, it also allows for efficient usage of the data request limits of the Twitter API. As  
43 Twitter limits the number of tweets one is able to collect from the Twitter API, this  
44 interval is an efficient way of collecting data for all 20 global health actors for the  
45 timeframe. A total of 74,241 tweets were collected from 2016 to 2020 for the 20 global  
46 health actors. Supplementary Tables 2 and 3 further describe the tweets collected.  
47  
48

49 Using Twitter as a data source plays an important role in analyzing GHG, examining  
50 whether it operates under the RAM, and characterizing power dynamics. In the  
51 academic area of communications studies, researchers suggest that there are two  
52 forms of utility that motivate actors to post content on Twitter. First, intrinsic utility  
53 assumes that a user receives inherent satisfaction from posting content on Twitter.[19]  
54 On its about page, Twitter positions “itself as a real-time information network powered  
55  
56  
57  
58  
59  
60

by people all around the world that lets you share and discover what's happening now...to millions across the globe." By this definition, global health actors acquire more intrinsic utility as their tweets reach a greater number of users. Second, image-related utility assumes that the perceptions of others,[20,21] and seeking status or prestige are strong motivators for posting content.[22,23] As global health actors operate best with high public approval, posting content on Twitter can improve public perception. Twitter is the ideal platform for global health actors to simultaneously share their work to a greater number of individuals and to improve their public perception. The utility received from using Twitter explains the social media's ubiquity among global health actors.

Because Twitter limits each post to 280 characters, the platform promotes short, frequent, and straightforward manners of communication. The tweets of global health actors are regular ways of communicating their work, preferences, and priorities to the public.[24–27] The tweets of global health actors act as an archive, a record of historical preferences, priorities, goals, and implemented programs.[28]

### Obtaining priorities from Twitter data

NLP is a subfield in artificial intelligence, computer science, and linguistics at the intersection of the human language and computers. NLP is concerned about how to utilize computers to process and analyze large quantities of human language data. We use NLP in analyzing the tweets of the global health actors for two reasons. First, NLP allows for the efficient analysis of tens of thousands of rows of text data that could not be done manually.[29–31] Second, NLP allows for a technique called topic modeling where an algorithm generates lists of words that are frequently used together.[32–34] These lists of words can then be interpreted to identify specific themes, topics, or issues to identify the top 10 priorities of each global health actor from 2016 to 2020. The results of the topic modeling are then used in a network analysis that visualizes where each actor converges or diverges in global health priorities with other actors.

As seen in Table 3, ten topics were generated using the Latent Dirichlet Allocation (LDA) topic model for each global health actor's tweets to reveal their priorities from 2016 to 2020. LDA is a generative probabilistic modeling method where words in a corpus of text that are frequently used together are categorized into topics.[35] This follows the assumption that documents, or in this case Twitter profiles, can be broken down into multiple topics that are identified by certain combinations of words.

**Table 3. Revealed Priorities from Twitter Topic Modeling.** Ten revealed priorities of each of the 20 global health actors based on their tweets from 2016 to 2020. Priorities are alphabetically arranged. Red indicates Funding Organizations. Blue indicates Channels of DAH. Gray indicates Implementing Institution.

| United States    | United Kingdom | Gates Foundation | WHO           | World Bank       | UNAIDS         | UNFPA            | UNICEF         | UNITAID   | GAVI      |
|------------------|----------------|------------------|---------------|------------------|----------------|------------------|----------------|-----------|-----------|
| Africa           | Africa         | Africa           | Africa        | Africa           | Access         | Africa           | Africa         | Access    | Africa    |
| Children         | Agriculture    | Breastfeeding    | Breastfeeding | Agriculture      | Africa         | Child Marriage   | Breastfeeding  | Cancer    | Cancer    |
| Education        | Children       | Children         | Children      | Children         | Discrimination | Children         | Children       | Children  | Children  |
| Food Security    | Development    | Education        | Ebola         | Climate Change   | HIV/AIDS       | Family Planning  | Climate Change | Hepatitis | Cholera   |
| HIV/AIDS         | Ebola          | HIV/AIDS         | HIV/AIDS      | Food Security    | Human Rights   | FGM              | Ebola          | HIV/AIDS  | Ebola     |
| Humanitarian Aid | Education      | Malaria          | Malaria       | Humanitarian Aid | Innovation     | Human Rights     | Education      | Malaria   | Measles   |
| Mothers          | Food Security  | Mothers          | Measles       | Poverty          | Prevention     | Humanitarian Aid | Human Rights   | Testing   | Pneumonia |

|                    |                  |               |               |                |                |                  |               |                          |                  |
|--------------------|------------------|---------------|---------------|----------------|----------------|------------------|---------------|--------------------------|------------------|
| South America      | HIV/AIDS         | Polio         | Mothers       | Sanitation     | Testing        | Nutrition        | Online        | Treatment                | Polio            |
| Water              | Humanitarian Aid | Sanitation    | Polio         | Water          | Treatment      | Violence         | Violence      | Tuberculosis             | Poverty          |
| Women              | Water            | Women         | Women         | Women          | Women          | Women            | Water         | Vaccines                 | Vaccines         |
| <b>Global Fund</b> | <b>CDC</b>       | <b>EU CDC</b> | <b>NIH</b>    | <b>FAO</b>     | <b>UNDP</b>    | <b>MSF</b>       | <b>PATH</b>   | <b>Save the Children</b> | <b>Oxfam</b>     |
| Africa             | Children         | Ebola         | Africa        | Africa         | Africa         | Africa           | Access        | Africa                   | Africa           |
| Children           | Diarrhea         | Hepatitis     | Cancer        | Agriculture    | Children       | Children         | Africa        | Children                 | Climate Change   |
| Cholera            | E. Coli          | HIV/AIDS      | Funding       | Biodiversity   | Climate Change | Cholera          | Breastfeeding | Donations                | Ebola            |
| Ebola              | Influenza        | Influenza     | Heart Disease | Climate Change | Education      | Ebola            | Cancer        | Education                | Food Security    |
| HIV/AIDS           | Measles          | Measles       | HIV/AIDS      | Families       | FGM            | HIV/AIDS         | Children      | Food Security            | Humanitarian Aid |
| Malaria            | Prevention       | Outbreaks     | News          | Farmers        | Food Security  | Humanitarian Aid | Ebola         | Humanitarian Aid         | Malaria          |
| Pneumonia          | Vaccines         | Report        | Rare Disease  | Fisheries      | HIV/AIDS       | Refugees         | Innovation    | Pneumonia                | Pneumonia        |
| Polio              | Water            | Surveillance  | Research      | Food Security  | Malaria        | Treatment        | Malaria       | Refugees                 | Refugees         |
| Tuberculosis       | Women            | Tuberculosis  | Stress        | Forests        | Water          | Tuberculosis     | Pneumonia     | Schools                  | Water            |
| Women              | Zika             | West Nile     | Veterans      | Water          | Women          | Violence         | Vaccines      | Water                    | Women            |

Additionally, we model a network map from the priorities generated using the LDA topic model also using the Fruchterman-Reingold algorithm. This network map visualizes the similarities in priorities between the 20 actors. Data used for this network map can be found in Supplementary Table 4. This network map is compared with the network map generated using financial data from IHME in the findings section. This comparison between network maps can illustrate if priorities from tweets and from financial data are aligned.

### Testing if GHG operates under the RAM

By combining evidence for stated and revealed priorities of 20 key global health actors, we can determine if GHG operates under the RAM.

The rational actor model (RAM) in international cooperation is categorized as the “linchpin of foreign policy decision making.”[36] This approach is rooted in expected utility theory in microeconomics introduced by von Neumann and Morgenstern in the 1940s and subsequent theories of rationality.[37]

RAM is most useful in explanations of economic behavior if the three conditions of the rationality assumption are fulfilled.[36] First, it is assumed that an actor’s goal is pre-determined before intentionally acting to achieve it.[36] Second, actors are assumed to “display consistent preferences as manifested in the ability to rank the preferences in transitive order.”[36] Third, actors are assumed to maximize utility while choosing an alternative that provides the highest amount of net personal benefit.[36]

GHG operates under RAM if each of the 20 global health actors and the global health system collectively fulfill the three assumptions of pre-determined goal, rank order preferences, and benefit maximization.

To test the first assumption of pre-determined goal, we determine the stated priorities of each global health actor from policy documents. We test whether there exist explicit statements on goals and priorities and note what health areas or issues are the stated priorities of each global health actor.

1  
2  
3 To test the second assumption of consistent rank order preferences, we compare  
4 revealed priorities from DAH funding data and revealed priorities from tweets. From the  
5 DAH funding data, we can determine rank order preferences based on which health  
6 issues are allocated the most funding in 2019. From tweets, we can determine rank  
7 order preferences based on the top 10 topics each global health actor tweeted about  
8 from 2016 to 2020. If there is consistency in rank order preferences between the  
9 revealed priorities from DAH funding data and revealed priorities from tweets, then the  
10 second assumption is fulfilled.  
11

12  
13 To test the third assumption of benefit maximization, we compare the stated and  
14 revealed priorities from all three data sources. The priorities that are consistent across  
15 stated priorities from policy documents and revealed priorities from DAH funding data  
16 and from tweets are revealed to be the priority that the global health actor determines to  
17 be benefit maximizing.  
18

19 We also test the three assumptions at the global health system level. Pre-determined  
20 goals are obtained from stated priorities from collective stated commitments to global  
21 health. Consistent rank order preferences are derived from the alignment between  
22 aggregated DAH funding allocations of all global health actors and the most common  
23 topics generated from tweets across all global health actors. The consistent preferences  
24 across stated and revealed priorities are inferred to be what the global health systems  
25 decides to be benefit maximizing.  
26

27 If each global health actor fulfills the three assumptions, and if the global health system  
28 collectively fulfills the three assumptions, then GHG operates under the RAM.  
29

### 30 **Definitions and types of power**

31  
32 “Power is exercised everywhere in global health although its presence may be more  
33 apparent in some instances than others,”[38] one global health researcher notes. The  
34 power concept in global health does not stray far from Robert Dahl’s (1957) definition in  
35 his seminal study where he describes “A has power over B to the extent that he can get  
36 B to do something B would not otherwise do.”[39] Specifically, power can be categorized  
37 into four types introduced by Barnett and Duvall (2005), each manifesting in different  
38 manners in global health.[40] Supplementary Table 5 summarizes Barnett and Duvall’s  
39 four types of power. First, compulsory power is defined as “direct control of one actor  
40 over the conditions of existence or the actions of another.”[40] In global health,  
41 compulsory power can be seen in how donor countries dictate the conditions in low and  
42 middle-income countries (LMICs) through development aid.[41] Second, institutional  
43 power is “the control actors exercise indirectly over others through diffuse relations of  
44 interactions.”[40] High-income countries control funding allocations for LMICs through  
45 institutional power via their contributions to the WHO and other multilateral  
46 organizations. Third, structural power refers to the “constitution of subjects’ capacities in  
47 direct structural relation to one another.”[40] The structural and historical  
48 disempowerment of indigenous populations have resulted in their disproportionate  
49 outcomes in health.[42,43] Fourth, “productive power works through diffuse constitutive  
50 relations to produce the situated social capacities of actors.”[40] Research institutions  
51 funded by high-income countries direct what health issues are studied and  
52 addressed.[44]  
53  
54  
55  
56  
57  
58  
59

## Characterizing power dynamics in GHG

To characterize the power dynamics manifested in GHG, we analyze the interplay of stated and revealed priorities between funding organizations, channels of DAH, and implementing organizations. Particularly, we identify which global health actors have the most influence in setting global health priorities. The global health actors which have the most priorities aligned with the stated and revealed priorities of the global health system are determined to have the most influence and power in priority-setting.

## FINDINGS

### GHG operates under RAM

As seen in Supplementary Table 1, we find that each of the 20 key global health actors fulfills the three assumptions of the RAM. Each actor has a pre-determined goal stated in mission statements, strategic plans, multi-year strategies, and other policy documents. Each actor has consistent rank order preferences as observed in the alignment of order of preferences in DAH funding data and top identified topics from tweets. Consistent, top ranking preferences across policy documents, funding data, and tweets are the alternatives that maximize benefits for each global health actor based on their pre-determined goal.

As shown in the last row of Supplementary Table 1, we find that the global health system collectively fulfills the three assumptions of the RAM. The pre-determined goal of the global health system can be found in the WHO constitution and the 9 target areas for Sustainable Development Goal (SDG) 3 on good health and well-being. All 20 global health actors have stated commitments to the WHO mission and the SDGs. The alignment of DAH funding allocations and most common health issues from Twitter reveal that in terms of rank order, HIV/AIDS, child health, and maternal health are the top 3 priorities of the global health system collectively. To maximize benefits of the pre-determined goal of “health for all” and “SDG3: good health and well-being”, the global health system prioritizes HIV/AIDS, child health, and maternal health. Among all 9 stated targets in SDG3, only these three issues are prioritized. Effectively, the 6 other stated targets in SDG3 are deprioritized and underfunded by the global health system.

Since each global health actor and the global health system collectively fulfills the three assumptions, we find that GHG operates under the RAM. However, this does not imply cooperation of global health actors. This finding demonstrates the fact that each global health actor operates based on their rational self-interest and that the global health system operates based on the pursuit of only some of the stated priorities. Who determines which priorities are pursued by the global health system? The findings on power dynamics in GHG reveal the actors who determine global priorities.

### Compulsory and institutional power asymmetries in GHG

As demonstrated in the following network maps, we find that there is compulsory and institutional power asymmetry in GHG.

Compulsory power asymmetry can be found in how funding organizations strongly influence channels of DAH and implementing institutions based on their relationship. Channels of DAH and implementing institutions rely on funding organizations for resources to continue operating. We find that the top priorities of the 3 funding



1  
2  
3 organizations in this study are also the priorities of channels of DAH and implementing  
4 institutions.  
5

6 As seen in Figure 1, HIV/AIDS is 1st priority of United States Agency for International  
7 Development (USAID), 2nd priority of United Kingdom Department for International  
8 Development (UK-DFID), and 2nd priority of the Bill and Melinda Gates Foundation  
9 (BMGF) based on the alignment of stated and revealed priorities. HIV/AIDS is a priority  
10 of 4 of 8 channels of DAH and 4 of 9 implementing institutions based on its presence in  
11 policy documents, DAH funding, and tweets of each actor.  
12

13 Figure 1 also demonstrates that maternal and child health is 2nd priority of USAID, 1st  
14 priority of UK-DFID, and 1st priority of BMGF based on the alignment stated and  
15 revealed priorities. Maternal and child health is a priority of 6 of 8 channels of DAH and  
16 7 of 9 implementing institutions based on its presence in policy documents, DAH  
17 funding, and tweets of each actor.  
18

19 Following the flow of the funding in Figure 2 and the similarities in tweets in Figure 1, we  
20 can see that institutional power asymmetry can be found in how funding organizations  
21 strongly influence implementing institutions through outsized influence of channels of  
22 DAH that allocate funding to these implementing institutions. As some implementing  
23 institutions do not get direct funding from funding organizations, but through channels of  
24 DAH, channels of DAH have direct control of funding of implementing institutions.  
25 Because wealthy funding organizations influence the priorities of channels of DAH,  
26 transitively, funders have power over implementing institutions. Implementing  
27 institutions in turn align their priorities with the priorities of channels of DAH, and  
28 transitively with the priorities of funding organizations.  
29

30 Both network analyses of revealed priorities from DAH funding data and from tweets  
31 show how there is asymmetric levels of power held by the United States, United  
32 Kingdom, and the Gates Foundation in comparison to other actors. Figure 2 reveals  
33 how these three funding organizations are the largest funders for the work of the Global  
34 Fund, WHO, World Bank, US Foundations, UN organizations, and Gavi. The IHME DAH  
35 database reveals that 24% of all DAH funding was allocated to HIV/AIDS, 21% to child  
36 health, and 12% to maternal health – the three top priorities of funding  
37 organizations.[17]<sup>17</sup> Only 14% was allocated to health system strengthening and 2% to  
38 non-communicable diseases.[17]<sup>17</sup>  
39

40 Figure 1 reveals how the most common topics generated across all global health actors  
41 include Africa, HIV/AIDS, child health, women health, and infectious diseases. These  
42 are the same health issues highly prioritized by the United States, United Kingdom, and  
43 Gates foundation. Comparing figures 1 and 2, we find that these three funding  
44 organizations have outsized influence in priority-setting. Funding organizations have  
45 outsized influence because of how much DAH funding these three organizations have  
46 provided in comparison to other funding organizations. We find that the programs  
47 implemented and issues prioritized from 2016 to 2020 as documented through the  
48 tweets of the actor revolve around the main priorities of funding organizations of  
49 HIV/AIDS, child health, maternal health, infectious disease, and Africa.  
50

## 51 52 53 54 **CONCLUSION** 55

1  
2  
3 We find empirical evidence at the global level showing that GHG operates under the  
4 RAM. Additionally, we find that at the global level, there is asymmetric compulsory and  
5 institutional power held by funding organizations, allowing global health priorities to be  
6 set by funders that have the money to spend on global health. In the past years, these  
7 funders have been the United States, United Kingdom, and the Gates Foundation. The  
8 rational choice for all global health actors is to align their priorities with those of funding  
9 organizations in order to continue with their programs. The priorities of funders of  
10 HIV/AIDS, child health, and maternal health have been prioritized from 2016-2020.  
11 While global health has seen improvements in these three areas, other important health  
12 issues are deprioritized and underfunded, leading to a persistence in global health  
13 inequity. If "health for all" and the SDG3 targets are to be achieved, then there must be  
14 a reassessment of current GHG under the RAM.  
15  
16  
17  
18

19 **Acknowledgements:** We thank participants in the Harvard Law School Global Justice  
20 Workshop for helpful comments on an earlier version of this work.  
21

22 **Author contributions:** G.F.B and J.P.R. made substantial contributions to the  
23 conception and design of the study, J.P.R supervised the research planning, analysis  
24 and execution and interpretation of data and analysis and G.F.B. conducted the  
25 analyses, G.F.B prepared the manuscript draft with J.P.R.'s critical input and revisions  
26 for important intellectual content, G.F.B. and J.P.R approved the final manuscript  
27 version to be published. J.P.R obtained funding, G.F.B and J.P.R agree to be  
28 accountable for all aspects of the work.  
29  
30

31 **Funding Statement:** This work was supported by the Health Equity and Policy Lab  
32 (HEPL) at the University of Pennsylvania. We acknowledge funding, in part, by the Vice  
33 Provost for Research University Research Foundation at the University of Pennsylvania.  
34  
35

36 **Competing interests:** No author has competing interests to declare.  
37

38 **Ethics approval:** The study did not have any human or animal participants.  
39 Additionally, the study did not require ethical approval as the Twitter data used were  
40 already in the public domain.  
41

42 **Data and materials availability:** Under the "Content Redistribution" section of Twitter's  
43 Developer Agreement and Policy, "We restrict the redistribution of Twitter Content to  
44 third parties. If you provide Twitter Content to third parties, including downloadable  
45 datasets or via an API, you may only distribute Tweet IDs, Direct Message IDs, and/or  
46 User IDs." Because the data collected using the Twitter API does not allow for  
47 redistribution under the Twitter Developer Agreement and Policy, tweets cannot be  
48 made publicly available. Only Tweet ID's and User ID's are allowed to be redistributed  
49 according to the Twitter policy. Please email [jenpr@upenn.edu](mailto:jenpr@upenn.edu) if you wish to receive a  
50 copy of the Tweet ID's and User ID's of the data and/or the code used in the study. The  
51 IHME DAH Database can be found at [http://ghdx.healthdata.org/record/ihme-](http://ghdx.healthdata.org/record/ihme-data/development-assistance-health-database-1990-2019)  
52 [data/development-assistance-health-database-1990-2019](http://ghdx.healthdata.org/record/ihme-data/development-assistance-health-database-1990-2019)  
53  
54  
55  
56  
57  
58  
59  
60

## REFERENCES

- 1 Ng NY, Ruger JP. Global Health Governance at a Crossroads. *Global health governance : the scholarly journal for the new health security paradigm* 2011;**3**.
- 2 Giaimo S. Interest Groups, Think Tanks, and Health Care Policy (1960s-Present). In: *Guide to U.S. Health and Health Care Policy*. Thousand Oaks CA: : SAGE Publications 2014. 375–92.
- 3 Spicer N, Agyepong I, Ottersen T, *et al*. 'It's far too complicated': why fragmentation persists in global health. *Globalization and Health* 2020;**16**. doi:10.1186/s12992-020-00592-1
- 4 Szlezák NA, Bloom BR, Jamison DT, *et al*. The Global Health System: Actors, Norms, and Expectations in Transition. *PLoS Medicine* 2010;**7**. doi:10.1371/journal.pmed.1000183
- 5 United Kingdom House of Lords. Chapter 3: International health: the institutional labyrinth. Select Committee on Intergovernmental Organisations First Report. 2008.
- 6 Ottersen OP, Dasgupta J, Blouin C, *et al*. The political origins of health inequity: Prospects for change. *The Lancet*. 2014;**383**. doi:10.1016/S0140-6736(13)62407-1
- 7 Walt G. Global cooperation in international public health. In: Merson M, Black R, Mills A, eds. *International Public Health*. Gaithersburg, Maryland: : Aspen Publishers 2001.
- 8 Mayhew SH, Walt G, Lush L, *et al*. Donor Agencies' Involvement in Reproductive Health: Saying One Thing and Doing Another? *International Journal of Health Services* 2005;**35**. doi:10.2190/K46B-RRXJ-95M4-JDQU
- 9 Burris S. Governance, Microgovernance and Health. *Temple Law Review* 2004;**77**:335–62.
- 10 Brooks A, Cutts FT, Walt G. Policy study of factors influencing the adoption of new and underutilized vaccines in developing countries. Washington D.C.: 1999.
- 11 Travis P, Bennett S, Haines A, *et al*. Overcoming health-systems constraints to achieve the Millennium Development Goals. *The Lancet* 2004;**364**. doi:10.1016/S0140-6736(04)16987-0
- 12 Hoffman SJ, Røttingen J-A. Dark sides of the proposed Framework Convention on Global Health's many virtues: A systematic review and critical analysis. *Health and Human Rights* 2013;**15**:117–34.
- 13 Ruger JP. Global health governance as shared health governance. *Journal of Epidemiology and Community Health* 2012;**66**. doi:10.1136/jech.2009.101097
- 14 CONSTITUTION of the World Health Organization. *Chronicle of the World Health Organization* 1947;**1**.
- 15 Frenk J, Moon S. Governance Challenges in Global Health. *New England Journal of Medicine* 2013;**368**. doi:10.1056/NEJMr1109339
- 16 Hoffman SJ, Cole CB. Defining the global health system and systematically mapping its network of actors. *Globalization and Health* 2018;**14**. doi:10.1186/s12992-018-0340-2
- 17 Institute for Health Metrics and Evaluation (IHME). Development Assistance for Health Database 1990-2019. *Institute for Health Metrics and Evaluation (IHME)* 2020.



- 1  
2  
3 18 Hevey D. Network analysis: A brief overview and tutorial. *Health Psychology and Behavioral Medicine* 2018;**6**. doi:10.1080/21642850.2018.1521283
- 4  
5  
6 19 Ryan RM, Deci EL. Self-determination theory and the facilitation of intrinsic motivation, social  
7 development, and well-being. *American Psychologist* 2000;**55**. doi:10.1037/0003-066X.55.1.68
- 8  
9 20 Donelle L, Booth R. Health Tweets: An Exploration of Health Promotion on Twitter. *American Nurses*  
10 *Association* 2012;**17**.
- 11  
12 21 Park H, Rodgers S, Stemmler J. Analyzing Health Organizations' Use of Twitter for Promoting Health  
13 Literacy. *Journal of Health Communication* 2013;**18**. doi:10.1080/10810730.2012.727956
- 14  
15 22 Glazer A, Konrad K. A Signaling Explanation for Charity. *American Economic Review* 1996;**86**:1019–28.
- 16  
17 23 Harbaugh W. The Prestige Motive for Making Charitable Transfers. *American Economic Review*  
18 1998;**88**:227–82.
- 19  
20 24 Fung IC-H, Jackson AM, Ahweyevu JO, *et al.* #Globalhealth Twitter Conversations on #Malaria, #HIV, #TB,  
21 #NCDS, and #NTDS: a Cross-Sectional Analysis. *Annals of Global Health* 2017;**83**.  
22 doi:10.1016/j.aogh.2017.09.006
- 23  
24 25 Goff DA, Kullar R, Laxminarayan R, *et al.* Twitter to engage, educate, and advocate for global antibiotic  
25 stewardship and antimicrobial resistance. *The Lancet Infectious Diseases* 2019;**19**. doi:10.1016/S1473-  
26 3099(19)30058-1
- 27  
28 26 Guidry JPD, Jin Y, Orr CA, *et al.* Ebola on Instagram and Twitter: How health organizations address the  
29 health crisis in their social media engagement. *Public Relations Review* 2017;**43**.  
30 doi:10.1016/j.pubrev.2017.04.009
- 31  
32 27 Scanfeld D, Scanfeld V, Larson EL. Dissemination of health information through social networks: Twitter  
33 and antibiotics. *American Journal of Infection Control* 2010;**38**. doi:10.1016/j.ajic.2009.11.004
- 34  
35 28 Zamora A. Making Room For Big Data: Web Scraping and an Affirmative Right to Access Publicly  
36 Available Information Online. *Journal of Business, Entrepreneurship & the Law* 2019;**12**:203–28.
- 37  
38 29 Alvarez-Melis D, Saveski M. Topic Modeling in Twitter: Aggregating Tweets by Conversations. *Tenth*  
39 *International AAAI Conference on Web and Social Media* 2016.
- 40  
41 30 Hong L, Davison BD. Empirical study of topic modeling in Twitter. In: *Proceedings of the First Workshop*  
42 *on Social Media Analytics - SOMA '10*. New York, New York, USA: : ACM Press 2010.  
43 doi:10.1145/1964858.1964870
- 44  
45 31 Yang S-H, Kolcz A, Schlaikjer A, *et al.* Large-scale high-precision topic modeling on twitter. In:  
46 *Proceedings of the 20th ACM SIGKDD international conference on Knowledge discovery and data mining*  
47 *- KDD '14*. New York, New York, USA: : ACM Press 2014. doi:10.1145/2623330.2623336
- 48  
49 32 Bakshi RK, Kaur N, Kaur R, *et al.* Opinion mining and sentiment analysis. *2016 3rd International*  
50 *Conference on Computing for Sustainable Global Development (INDIACom)* 2016;:452–5.
- 51  
52 33 Pak A, Paroubek P. Twitter as a Corpus for Sentiment Analysis and Opinion Mining. *LREc* 2010;**10**:1320–  
53 6.
- 54  
55  
56  
57  
58  
59  
60

- 1  
2  
3 34 Saif H, He Y, Alani H. Semantic Sentiment Analysis of Twitter. 2012. doi:10.1007/978-3-642-35176-1\_32  
4  
5 35 Blei DM, Ng AY, Jordan MI. Latent Dirichlet allocation. *Journal of Machine Learning Research* 2003;**3**.  
6 doi:10.1016/b978-0-12-411519-4.00006-9  
7  
8 36 Mintz A, DeRouen K. The Rational Actor Model. In: *Understanding Foreign Policy Decision Making*.  
9 Cambridge: : Cambridge University Press 2010. 57–68.  
10  
11 37 MacDonald PK. Useful Fiction or Miracle Maker: The Competing Epistemological Foundations of Rational  
12 Choice Theory. *American Political Science Review* 2003;**97**. doi:10.1017/S000305540300087X  
13  
14 38 Shiffman J. Knowledge, moral claims and the exercise of power in global health. *International Journal of*  
15 *Health Policy and Management* 2014;**3**. doi:10.15171/ijhpm.2014.120  
16  
17 39 Dahl RA. The concept of power. *Behavioral Science* 2007;**2**. doi:10.1002/bs.3830020303  
18  
19 40 Barnett M, Duvall R. Power in International Politics. *International Organization* 2005;**59**.  
20 doi:10.1017/S0020818305050010  
21  
22 41 Shawar YR, Ruger JP. The Politics of Global Health Inequalities: Approaches to Studying the Role of  
23 Power. In: McInnes C, Lee K, Youde J, eds. *The Oxford Handbook of Global Health Politics*. Oxford: 2020.  
24 59–76.  
25  
26 42 Holmes SM. Structural Vulnerability and Hierarchies of Ethnicity and Citizenship on the Farm. *Medical*  
27 *Anthropology* 2011;**30**. doi:10.1080/01459740.2011.576728  
28  
29 43 Goldade K. “Health Is Hard Here” or “Health for All”? *Medical Anthropology Quarterly* 2009;**23**.  
30 doi:10.1111/j.1548-1387.2009.01074.x  
31  
32 44 Sridhar D. Who Sets the Global Health Research Agenda? The Challenge of Multi-Bi Financing. *PLoS*  
33 *Medicine* 2012;**9**. doi:10.1371/journal.pmed.1001312  
34  
35  
36  
37  
38  
39  
40  
41  
42  
43  
44  
45  
46  
47  
48  
49  
50  
51  
52  
53  
54  
55  
56  
57  
58  
59  
60

1  
2  
3  
4  
5  
6  
7  
8  
9  
10  
11  
12  
13  
14  
15  
16  
17  
18  
19  
20  
21  
22  
23  
24  
25  
26  
27  
28  
29  
30  
31  
32  
33  
34  
35  
36  
37  
38  
39  
40  
41  
42  
43  
44  
45  
46  
47  
48  
49  
50  
51  
52  
53  
54  
55  
56  
57  
58  
59  
60

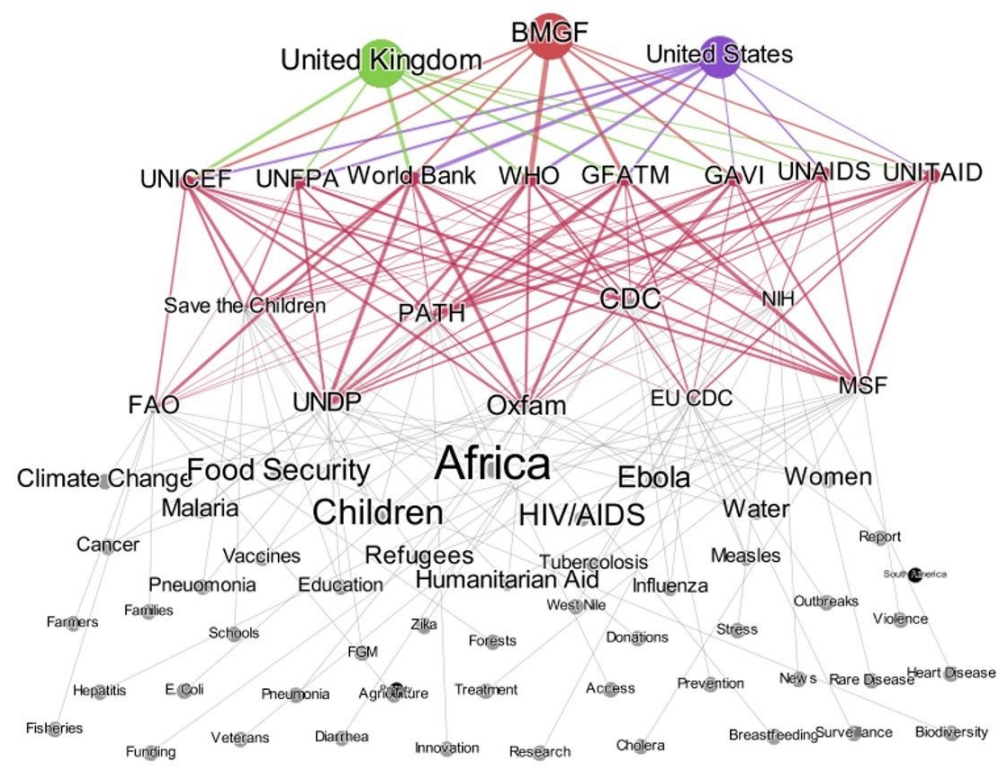

Figure 1. Network Analysis of Revealed Priorities from Tweets. Line thickness represents how many similar priorities one global health actor has with another. Font size of global health priorities represent the number of organizations have it as a priority. Data used found in Supplementary Table 4.

167x128mm (168 x 168 DPI)

1  
2  
3  
4  
5  
6  
7  
8  
9  
10  
11  
12  
13  
14  
15  
16  
17  
18  
19  
20  
21  
22  
23  
24  
25  
26  
27  
28  
29  
30  
31  
32  
33  
34  
35  
36  
37  
38  
39  
40  
41  
42  
43  
44  
45  
46  
47  
48  
49  
50  
51  
52  
53  
54  
55  
56  
57  
58  
59  
60

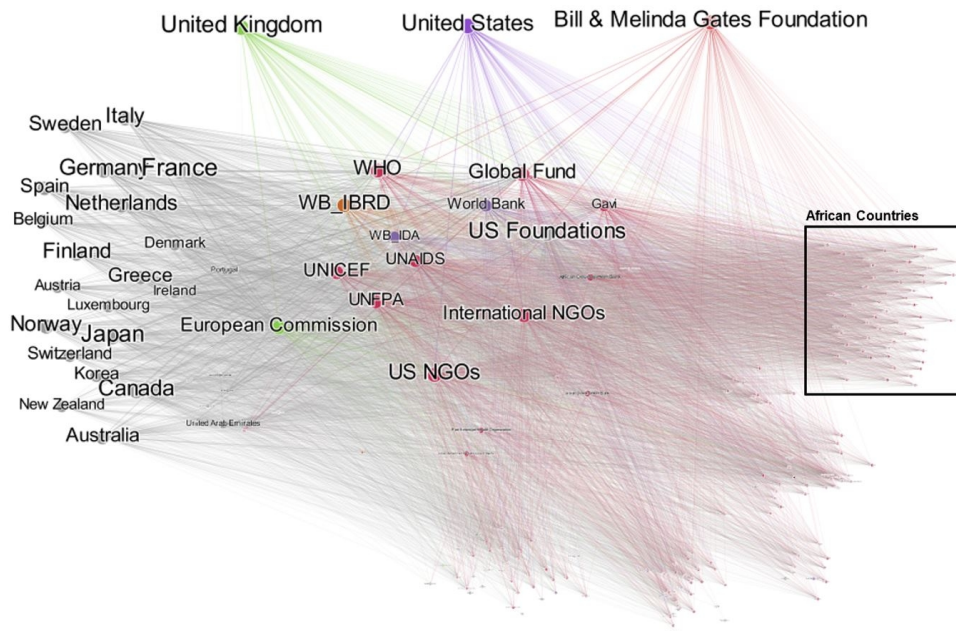

Figure 2. Network Analysis of Revealed Priorities from Funding for DAH (2019). Line thickness represents the amount of funding for health that was transferred between two actors. Font size represents the total amount of funding for health donated or received in 2019.

211x138mm (168 x 168 DPI)

## Supplemental Material

**Supplementary Table 1. Evidence and Testing RAM by Actor.** Evidence for stated and revealed priorities and testing of RAM for each actor and the global health system as a whole. Light red indicates funding organization, blue indicates channel of DAH, yellow indicates implementing institution, and dark red indicates global health system as a whole.

|         | Evidence                                                                                                                                                                                                                                                                                                                                                                                                                                                                                                                                                                                                                                                                                                                                                                                                                                                                                                                                                                                                                                                                                                                                                                                             |                                                                                                                                                                                                                                                                                                                                                                                                                                                                                                                                                                                                                                                                                                                                                                                                                                                                                                                                                                                                                                        |                                                                                                                                                                                                                            | Testing Assumptions of RAM                                                                                                                                                                                     |                                                                                                   |                                                                                                                                                                                                                                       | Operates under RAM? |
|---------|------------------------------------------------------------------------------------------------------------------------------------------------------------------------------------------------------------------------------------------------------------------------------------------------------------------------------------------------------------------------------------------------------------------------------------------------------------------------------------------------------------------------------------------------------------------------------------------------------------------------------------------------------------------------------------------------------------------------------------------------------------------------------------------------------------------------------------------------------------------------------------------------------------------------------------------------------------------------------------------------------------------------------------------------------------------------------------------------------------------------------------------------------------------------------------------------------|----------------------------------------------------------------------------------------------------------------------------------------------------------------------------------------------------------------------------------------------------------------------------------------------------------------------------------------------------------------------------------------------------------------------------------------------------------------------------------------------------------------------------------------------------------------------------------------------------------------------------------------------------------------------------------------------------------------------------------------------------------------------------------------------------------------------------------------------------------------------------------------------------------------------------------------------------------------------------------------------------------------------------------------|----------------------------------------------------------------------------------------------------------------------------------------------------------------------------------------------------------------------------|----------------------------------------------------------------------------------------------------------------------------------------------------------------------------------------------------------------|---------------------------------------------------------------------------------------------------|---------------------------------------------------------------------------------------------------------------------------------------------------------------------------------------------------------------------------------------|---------------------|
|         | Stated Priorities from Policy Documents                                                                                                                                                                                                                                                                                                                                                                                                                                                                                                                                                                                                                                                                                                                                                                                                                                                                                                                                                                                                                                                                                                                                                              | Revealed Priorities from DAH Data                                                                                                                                                                                                                                                                                                                                                                                                                                                                                                                                                                                                                                                                                                                                                                                                                                                                                                                                                                                                      | Revealed Priorities from Tweets                                                                                                                                                                                            | Pre-determined goal?                                                                                                                                                                                           | Consistent preferences?                                                                           | Utility maximizing?                                                                                                                                                                                                                   |                     |
| USAID   | <p>"On behalf of the American people, we promote and demonstrate democratic values abroad, and advance a free, peaceful, and prosperous world. <b>In support of America's foreign policy</b>, the U.S. Agency for International Development leads the U.S. Government's international development and disaster assistance through partnerships and investments that save lives, reduce poverty, strengthen democratic governance, and help people emerge from humanitarian crises and progress beyond assistance." (<a href="#">2019 USAID Financial Report</a>)</p> <p>"For over 50 years, USAID's global health programs have saved lives, protected people most vulnerable to disease, and promoted the stability of communities and nations, while advancing American security and prosperity. <b>America is safer and stronger when people can live healthy and productive lives and when nations around the world are self-reliant and resilient.</b>" (<a href="#">USAID Website</a>)</p> <p><b>Health Focus Area</b> (<a href="#">USAID Website</a>)</p> <ul style="list-style-type: none"> <li>Child and maternal death</li> <li>HIV/AIDS</li> <li>Malaria</li> <li>Tuberculosis</li> </ul> | <p><b>Health Focus Area</b><br/>49.0% of 2019 US DAH (\$6.0 billion) supported <b>HIV/AIDS</b>; 7.0% (\$862.5 million) supported <b>malaria</b>; 11.4% (\$1.4 billion) was disbursed for <b>child health</b>, and 10.8% (\$1.3 billion) went to <b>maternal health</b>.</p> <p><b>Region</b><br/>In 2017, the most recent year for which regional DAH estimates are available, the US directed much of its resources to <b>sub-Saharan Africa</b>, sending 50.5%, or \$6.9 billion, of 2017 DAH.</p> <p><b>Channel</b><br/>The US provided 59.2% of its funding in 2019 through its own bilateral agencies, including the United States Agency for International Development (<b>USAID</b>), the President's Malaria Initiative (<b>PMI</b>), and <b>PEPFAR</b>. <b>UN agencies</b> received 6.2% of US DAH in 2019, or \$761.4 million. <b>Gavi</b> received \$307.0 million, up 9.0% from 2018, and the <b>Global Fund</b> received \$636.5 million, down 25.8%. <b>NGOs</b> received 26.8% of US DAH in 2019, or \$3.3 billion.</p> | <p><b>Topics from 2016-2020 tweets</b><br/>(<a href="#">no order</a>)</p> <p>Africa<br/>Children<br/>Education<br/>Food Security<br/>HIV/AIDS<br/>Humanitarian Aid<br/>Mothers<br/>South America<br/>Water<br/>Women</p>   | <p>National security<br/>National interests</p> <p>Global health focus:<br/>Child and maternal health, HIV/AIDS, malaria, tuberculosis</p>                                                                     | <p>HIV/AIDS, child and maternal health, and Africa are consistent across DAH data and tweets</p>  | <p>HIV/AIDS, child and maternal health are consistent across stated and revealed priorities.</p> <p>To maximize benefits for national security and interests, USAID prioritizes HIV/AIDS and child and maternal health in Africa.</p> | Yes                 |
| UK DFID | <p>"<b>We pursue our national interests and project the UK as a force for good in the world.</b> We promote the interests of British citizens, safeguard the UK's security, defend our values, reduce poverty and tackle global challenges with our international partners." (<a href="#">UK FCDO, formerly DFID website</a>)</p> <p>"We are responsible for:</p> <ol style="list-style-type: none"> <li>honouring the UK's international commitments and taking</li> </ol>                                                                                                                                                                                                                                                                                                                                                                                                                                                                                                                                                                                                                                                                                                                          | <p><b>Health Focus Area</b><br/><b>Reproductive, maternal, newborn, and child health</b> was the focus of \$1.4 billion (38.5%) of the UK's DAH in 2019, followed by <b>HIV/AIDS</b> with \$553.9 million (15.8%).</p> <p><b>Region</b><br/>By GBD super-regions, the UK contributed \$1.3 billion, or 37.3% of its 2017 DAH, to <b>sub-</b></p>                                                                                                                                                                                                                                                                                                                                                                                                                                                                                                                                                                                                                                                                                       | <p><b>Topics from 2016-2020 tweets</b><br/>(<a href="#">no order</a>)</p> <p>Africa<br/>Agriculture<br/>Children<br/>Development<br/>Ebola<br/>Education<br/>Food Security<br/>HIV/AIDS<br/>Humanitarian Aid<br/>Water</p> | <p>National interests<br/>National security</p> <p>Global peace, security, and governance; Crisis response and resilience; Global prosperity; Extreme poverty and helping most vulnerable; Value for money</p> | <p>Child and maternal health, HIV/AIDS, and Africa are consistent across DAH data and tweets.</p> | <p>Child and maternal health, HIV/AIDS, and Africa are consistent across stated and revealed priorities.</p> <p>To maximize benefits for national security and interests, UK DFID prioritizes child and maternal</p>                  | Yes                 |

|             |                                                                                                                                                                                                                                                                                                                                                                                                                                                                                                                                                                                                                                                                                                                                                                                                                                                                                                                                                                                                                                                                                                                                                                                    |                                                                                                                                                                                                                                                                                                                                                                                                                                                                                                                                                      |                                                                                                                                                                                          |                                                                                                                                                                                                           |                                                                                                            |                                                                                                                                                                     |            |
|-------------|------------------------------------------------------------------------------------------------------------------------------------------------------------------------------------------------------------------------------------------------------------------------------------------------------------------------------------------------------------------------------------------------------------------------------------------------------------------------------------------------------------------------------------------------------------------------------------------------------------------------------------------------------------------------------------------------------------------------------------------------------------------------------------------------------------------------------------------------------------------------------------------------------------------------------------------------------------------------------------------------------------------------------------------------------------------------------------------------------------------------------------------------------------------------------------|------------------------------------------------------------------------------------------------------------------------------------------------------------------------------------------------------------------------------------------------------------------------------------------------------------------------------------------------------------------------------------------------------------------------------------------------------------------------------------------------------------------------------------------------------|------------------------------------------------------------------------------------------------------------------------------------------------------------------------------------------|-----------------------------------------------------------------------------------------------------------------------------------------------------------------------------------------------------------|------------------------------------------------------------------------------------------------------------|---------------------------------------------------------------------------------------------------------------------------------------------------------------------|------------|
|             | <p>action to achieve the <b>United Nations' Global Goals</b> making British aid more effective by improving transparency, openness and value for money</p> <ol style="list-style-type: none"> <li>targeting British international development policy on economic growth and wealth creation</li> <li>improving the coherence and performance of British international development policy in <b>fragile and conflict-affected countries</b></li> <li>improving the lives of <b>girls and women</b> through better education and a greater choice on <b>family planning</b> preventing <b>violence against girls and women</b> in the developing world</li> <li>helping to prevent climate change and encouraging adaptation and low-carbon growth in developing countries</li> </ol> <p>Priorities</p> <ul style="list-style-type: none"> <li>strengthening global peace, security and governance</li> <li><b>strengthening resilience and response to crisis</b></li> <li>promoting global prosperity</li> <li>tackling extreme poverty and <b>helping the world's most vulnerable</b></li> <li>delivering value for money"</li> </ul> <p><a href="#">(UK DFID About Page)</a></p> | <p><b>Saharan Africa;</b> \$301.0 million (8.7%) to South Asia; \$163.9 million (4.7%) to Southeast Asia, East Asia, and Oceania; \$237.9 million (6.9%) to North Africa and the Middle East; and \$41.0 million (1.2%) to Central Europe, Eastern Europe, and Central Asia.</p> <p><u>Channel</u><br/>Of the UK's 2019 DAH, \$990.3 million (28.2%) was channeled to <b>UK bilateral agencies;</b> \$524.6 million (14.9%) to <b>UN agencies;</b> \$306.4 million (8.7%) to <b>Gavi;</b> and \$817.1 million (23.3%) to the <b>Global Fund.</b></p> |                                                                                                                                                                                          |                                                                                                                                                                                                           |                                                                                                            | <p>health and HIV/AIDS in Africa.</p>                                                                                                                               |            |
| <p>BMGF</p> | <p><b>"Strategic Investments.</b> We partner with entrepreneurs, companies, and other organizations to create incentives that <b>harness the power of private enterprise to create change for those who need it most.</b>" (<a href="#">BMGF: how we work</a>)</p> <p><b>Global development.</b> "Our Global Development Division focuses on improving the delivery of <b>high-impact health</b></p>                                                                                                                                                                                                                                                                                                                                                                                                                                                                                                                                                                                                                                                                                                                                                                               | <p><u>Health Focus Area</u><br/>In 2019, the Gates Foundation directed \$1.5 billion, or 38.3%, of its DAH to <b>reproductive, maternal, newborn, and child health;</b> \$709.3 million, or 18.1%, to <b>HIV/AIDS;</b> \$303.9 million, or 7.8% to <b>malaria;</b> \$237.6 million, or 6.1%, to</p>                                                                                                                                                                                                                                                  | <p><u>Topics from 2016-2020 tweets (no order)</u></p> <p>Africa<br/>Breastfeeding<br/>Children<br/>Education<br/>HIV/AIDS<br/>Malaria<br/>Mothers<br/>Polio<br/>Sanitation<br/>Women</p> | <p>Strategic investments -- private enterprise solutions for most disadvantaged;</p> <p>High-impact health products and services to world's poorest</p> <p>Stated global development areas: Emergency</p> | <p>Child and maternal health, HIV/AIDS, malaria, and Africa are consistent across DAH data and tweets.</p> | <p>Child and maternal health, HIV/AIDS, malaria, and Africa are consistent across stated and revealed priorities.</p> <p>To maximize returns of their strategic</p> | <p>Yes</p> |



|     |                                                                                                                                                                                                                                                                                                                                                                                                                                                                                                                                                                                                                                                                                                                                                                                                                                                                                                                                                                                                                                                                                                                                                                                                                                                                                                                                                                                                |                                                                                                                                                                                                                                                                                                                                                                                                                                                                                                                                                                                                                                                                                                                                                                    |                                                                                                                                                                                                                                                                                                                                                                                                                                                                                                               |                                                                                                                                                                                                                                                                                                                                                         |                                                                                                                                                                                                                                                                                                |     |
|-----|------------------------------------------------------------------------------------------------------------------------------------------------------------------------------------------------------------------------------------------------------------------------------------------------------------------------------------------------------------------------------------------------------------------------------------------------------------------------------------------------------------------------------------------------------------------------------------------------------------------------------------------------------------------------------------------------------------------------------------------------------------------------------------------------------------------------------------------------------------------------------------------------------------------------------------------------------------------------------------------------------------------------------------------------------------------------------------------------------------------------------------------------------------------------------------------------------------------------------------------------------------------------------------------------------------------------------------------------------------------------------------------------|--------------------------------------------------------------------------------------------------------------------------------------------------------------------------------------------------------------------------------------------------------------------------------------------------------------------------------------------------------------------------------------------------------------------------------------------------------------------------------------------------------------------------------------------------------------------------------------------------------------------------------------------------------------------------------------------------------------------------------------------------------------------|---------------------------------------------------------------------------------------------------------------------------------------------------------------------------------------------------------------------------------------------------------------------------------------------------------------------------------------------------------------------------------------------------------------------------------------------------------------------------------------------------------------|---------------------------------------------------------------------------------------------------------------------------------------------------------------------------------------------------------------------------------------------------------------------------------------------------------------------------------------------------------|------------------------------------------------------------------------------------------------------------------------------------------------------------------------------------------------------------------------------------------------------------------------------------------------|-----|
|     | <p><b>products and services</b> to the world's poorest communities and helps countries expand access to health coverage.</p> <p><b>Areas:</b> Emergency Response, Family Planning, Global Delivery Programs, Global Libraries, Maternal, Newborn &amp; Child Health, Nutrition, Polio" (<a href="#">BMGF: our work</a>)</p> <p><b>Global health.</b> "Our Global Health Division aims to <b>reduce inequities in health</b> by developing new tools and strategies to reduce the <b>burden of infectious disease</b> and the <b>leading causes of child mortality</b> in developing countries.</p> <p><b>Areas:</b> Discovery &amp; Translational Sciences, Enteric and Diarrheal Diseases, HIV, Innovative Technology Solutions, Institute for Disease Modeling, Integrated Development, Malaria, Maternal, Newborn &amp; Child Health, Discovery &amp; Tools, Neglected Tropical Diseases, Pneumonia Tuberculosis, Vaccine Development and Surveillance" (<a href="#">BMGF: our work</a>)</p>                                                                                                                                                                                                                                                                                                                                                                                                | <p><b>tuberculosis;</b> \$266.5 million, or 6.8%, to <b>health systems strengthening;</b> and \$72.4 million, or 1.9%, to <b>non-communicable diseases.</b></p> <p><u>Region</u><br/>In 2017, the Foundation provided 41% of its DAH to <b>global recipients</b> and programs and 18% to <b>sub-Saharan Africa.</b></p> <p><u>Channel</u><br/>The Gates Foundation's 2019 DAH total of \$3.9 billion was an increase of 9.9% from 2018. Of this, \$2.5 billion or 64.0% was channeled through the Gates Foundation <b>directly to implementing institutions.</b> In 2019, \$266.8 million (7%) in Gates Foundation DAH went to <b>UN agencies,</b> \$256.9 million (7%) went to the <b>Global Fund,</b> and \$406.1 million (10%) was directed to <b>Gavi.</b></p> | <p>Response, Family Planning, Global Delivery Programs, Global Libraries, Maternal, Newborn &amp; Child Health, Nutrition, Polio</p> <p>Stated global health areas: Discovery &amp; Translational Sciences, Enteric and Diarrheal Diseases, HIV, Innovative Technology Solutions, Institute for Disease Modeling, Integrated Development, Malaria, Maternal, Newborn &amp; Child Health, Discovery &amp; Tools, Neglected Tropical Diseases, Pneumonia Tuberculosis, Vaccine Development and Surveillance</p> | <p>investments, BMGF prioritizes child and maternal health, HIV/AIDS, and malaria in Africa.</p>                                                                                                                                                                                                                                                        |                                                                                                                                                                                                                                                                                                |     |
| WHO | <p><b>"Health for all.</b> Ensuring universal health coverage without impoverishment is the foundation for achieving the health objectives of the Sustainable Development Goals – because when people are healthy, their families, communities and countries benefit. Our top priority must be to support national health authorities' efforts to strengthen all the building blocks of health systems and to enact policies aimed at ensuring health care is equitable and affordable for all.</p> <p><b>Health emergencies.</b> In today's interconnected world, public health emergencies can affect anyone, anywhere – and the Ebola crisis in West Africa showed us the dangers of being unprepared. The development of resilient and robust global and local health systems capable of preventing, monitoring, detecting and responding to public health emergencies must therefore be a key priority, closely linked to our efforts to achieve universal health coverage.</p> <p><b>Women, children and adolescents.</b> We cannot achieve the ambitious health and development targets in the Sustainable Development Goals unless we secure the health, dignity and rights of women, children and adolescents. Yet, in too many places, gender gaps, harmful cultural and social practices and gender-based violence are negatively impacting these individuals. Because of that,</p> | <p><u>Health Focus Area</u><br/>WHO provided \$2.5 billion of DAH in 2019, down 1.2% from 2018. Of this, \$630.7 million or 24.9% was disbursed to other <b>infectious diseases</b> and \$1.0 billion or 39.8% to <b>health systems strengthening.</b></p> <p><u>Region</u><br/>DAH data for the WHO in 2019 have unallocated or unspecified regions.</p>                                                                                                                                                                                                                                                                                                                                                                                                          | <p><u>Topics from 2016-2020 tweets (no order)</u></p> <p>Africa<br/>Breastfeeding<br/>Children<br/>Ebola<br/>HIVA/AIDS<br/>Malaria<br/>Measles<br/>Mothers<br/>Polio<br/>Women</p>                                                                                                                                                                                                                                                                                                                            | <p>Infectious diseases (ebola, HIV/AIDS, malaria, measles, polio) are consistent across DAH data and tweets.</p> <p>Universal health coverage, health systems strengthening, health equity, health emergencies, infectious diseases, maternal and child health, gender equity, climate and environmental impacts on health, improved WHO governance</p> | <p>Infectious diseases (ebola, HIV/AIDS, malaria, measles, polio) are consistent across stated and revealed priorities. To maximize the benefits of their pre-determined goal of health for all, WHO prioritizes on infectious diseases like Ebola, HIV/AIDS, malaria, measles, and polio.</p> | Yes |

1  
2  
3  
4  
5  
6  
7  
8  
9  
10  
11  
12  
13  
14  
15  
16  
17  
18  
19  
20  
21  
22  
23  
24  
25  
26  
27  
28  
29  
30  
31  
32  
33  
34  
35  
36  
37  
38  
39  
40  
41  
42  
43  
44  
45  
46  
47  
48  
49  
50  
51  
52  
53  
54  
55  
56  
57  
58  
59  
60

|                   |                                                                                                                                                                                                                                                                                                                                                                                                                                                                                                                                                                                                                                                                                                                                                                                                                                                                                                                                                                                                                                                                                                                                                                                                                                                                                                    |                                                                                                                                                                                                                                                                                                                                                                                                                                                                                                                                                                                                                                                                                                                                                                                   |                                                                                                                                                                                                           |                                                                                                                                                                                                                                                                       |                                                                                                                                                                                                                                                                                                                                                                                        |            |
|-------------------|----------------------------------------------------------------------------------------------------------------------------------------------------------------------------------------------------------------------------------------------------------------------------------------------------------------------------------------------------------------------------------------------------------------------------------------------------------------------------------------------------------------------------------------------------------------------------------------------------------------------------------------------------------------------------------------------------------------------------------------------------------------------------------------------------------------------------------------------------------------------------------------------------------------------------------------------------------------------------------------------------------------------------------------------------------------------------------------------------------------------------------------------------------------------------------------------------------------------------------------------------------------------------------------------------|-----------------------------------------------------------------------------------------------------------------------------------------------------------------------------------------------------------------------------------------------------------------------------------------------------------------------------------------------------------------------------------------------------------------------------------------------------------------------------------------------------------------------------------------------------------------------------------------------------------------------------------------------------------------------------------------------------------------------------------------------------------------------------------|-----------------------------------------------------------------------------------------------------------------------------------------------------------------------------------------------------------|-----------------------------------------------------------------------------------------------------------------------------------------------------------------------------------------------------------------------------------------------------------------------|----------------------------------------------------------------------------------------------------------------------------------------------------------------------------------------------------------------------------------------------------------------------------------------------------------------------------------------------------------------------------------------|------------|
|                   | <p>we must put the well-being of women, children and adolescents at the centre of global health and development.</p> <p><b>The health impacts of climate and environmental change.</b> Climate and environmental change impact many aspects of life that are inextricably linked to health – food security, economic livelihoods, air safety and water and sanitation systems – and WHO estimates that 12.6 million people die each year as a result of living or working in an unhealthy environment. To address this, WHO has a key role to play advancing both mitigation and adaptation strategies for climate and environmental change, working in close partnership with other UN agencies and stakeholders.</p> <p><b>A transformed WHO.</b> Building WHO into a more effective, transparent and accountable agency will require striking a balance between bold reform and stability of the organization. To meet the evolving needs and challenges of the 21st century and deliver game-changing, sustainable results, WHO will need to focus its work where it has the most value, broaden and intensify its engagement across stakeholders, attract more predictable, flexible financing, and work to identify and retain the best global talent.” (<a href="#">WHO Priorities</a>)</p> |                                                                                                                                                                                                                                                                                                                                                                                                                                                                                                                                                                                                                                                                                                                                                                                   |                                                                                                                                                                                                           |                                                                                                                                                                                                                                                                       |                                                                                                                                                                                                                                                                                                                                                                                        |            |
| <p>World Bank</p> | <p>“The World Bank Group works in every major area of development. We provide a wide array of financial products and technical assistance, and we help countries share and apply innovative knowledge and solutions to the challenges they face.</p> <p>Three priorities guide our work with countries to <b>end poverty and boost prosperity for the poorest people.</b> Helping create sustainable <b>economic growth, investing in people and building resilience to shocks and threats</b> that can roll back decades of progress.</p> <p><b>Themes</b></p> <ul style="list-style-type: none"> <li>• Economic Policy</li> <li>• Environment and Resource Development</li> <li>• Finance</li> <li>• Human Development and Gender</li> <li>• Private Sector Development</li> <li>• Public Sector Management</li> <li>• Social Development and Protection</li> <li>• Urban and Rural Development” (<a href="#">World Bank Annual Report 2019</a>)</li> </ul>                                                                                                                                                                                                                                                                                                                                      | <p><b>Health Focus Area</b> Focused on ending poverty in the world’s poorest countries, the World Bank’s International Development Association (IDA) disbursed \$1.1 billion of DAH in 2019, down 33.9% from 2018. The International Bank for Reconstruction and Development (IBRD) is a global development cooperative owned by 189 countries. As “the world’s largest development bank,” the IBRD helps countries reduce poverty and extend the benefits of sustainable growth to all people. In 2019, the IBRD disbursed \$11.1 billion of DAH, up 25.4% from 2018. Funds were targeted at <b>reproductive, maternal, newborn, and child health; vaccination programs; infectious diseases; and NCDs.</b></p> <p><b>Region</b> 27.6% of DAH disbursed by development banks</p> | <p><u>Topics from 2016-2020 tweets (no order)</u></p> <p>Africa<br/>Agriculture<br/>Children<br/>Climate change<br/>Food security<br/>Humanitarian aid<br/>Poverty<br/>Sanitation<br/>Water<br/>Women</p> | <p>End poverty and boost prosperity through sustainable economic growth, investing in people, and building resilience to shocks and threats;</p> <p>Maternal and child health, health emergencies, nutrition, infectious diseases, tobacco control, mental health</p> | <p>Child and maternal health and Africa are consistent across DAH data and tweets.</p> <p>Child and maternal health are consistent across stated and revealed priorities.</p> <p>To maximize the benefits of their pre-determined goal of ending poverty and boosting prosperity for the poorest people, the World Bank prioritizes on child and maternal health issues in Africa.</p> | <p>Yes</p> |



|        |                                                                                                                                                                                                                                                                                                                                                                                                                                                                                                                                                                                                                                                                                                                                                                     |                                                                                                                                                                                                                                                                                                                                                                                                                                                                                                                                                                                                                                                                                                            |                                                                                                                                                                                                            |                                                                                                           |                                                                                                          |                                                                                                                                                                                                                                                                |     |
|--------|---------------------------------------------------------------------------------------------------------------------------------------------------------------------------------------------------------------------------------------------------------------------------------------------------------------------------------------------------------------------------------------------------------------------------------------------------------------------------------------------------------------------------------------------------------------------------------------------------------------------------------------------------------------------------------------------------------------------------------------------------------------------|------------------------------------------------------------------------------------------------------------------------------------------------------------------------------------------------------------------------------------------------------------------------------------------------------------------------------------------------------------------------------------------------------------------------------------------------------------------------------------------------------------------------------------------------------------------------------------------------------------------------------------------------------------------------------------------------------------|------------------------------------------------------------------------------------------------------------------------------------------------------------------------------------------------------------|-----------------------------------------------------------------------------------------------------------|----------------------------------------------------------------------------------------------------------|----------------------------------------------------------------------------------------------------------------------------------------------------------------------------------------------------------------------------------------------------------------|-----|
|        | <p>"World Bank Health Focus Areas:</p> <ol style="list-style-type: none"> <li>1. <b>Women and children's health</b></li> <li>2. <b>Health emergencies</b></li> <li>3. <b>Nutrition</b></li> <li>4. <b>Infectious diseases</b></li> <li>5. <b>Tobacco control</b></li> <li>6. <b>Mental health"</b></li> </ol> <p><a href="#">(World Bank Health Focus Areas)</a></p>                                                                                                                                                                                                                                                                                                                                                                                                | <p>as group went to <b>sub-Saharan Africa</b> and 20.5% to North Africa and the Middle East.</p>                                                                                                                                                                                                                                                                                                                                                                                                                                                                                                                                                                                                           |                                                                                                                                                                                                            |                                                                                                           |                                                                                                          |                                                                                                                                                                                                                                                                |     |
| UNAIDS | <p><b>"Strategic leadership agenda</b><br/>In the light of the need for change, this Strategy seeks to achieve a set of far-reaching and people-centred goals and targets that must be met by 2020 if we are to reach our 2030 ambition of ending the AIDS epidemic. The goals correspond to each of the three strategic directions, and include achieving by 2020:</p> <ul style="list-style-type: none"> <li>• Fewer than 500 000 people newly infected with HIV</li> <li>• Fewer than 500 000 people dying from AIDS-related causes</li> <li>• Elimination of HIV-related discrimination"</li> </ul> <p><a href="#">(UNAIDS 2016-2021 Strategy)</a></p>                                                                                                          | <p><b>Health Focus Area</b><br/>UNAIDS is leading the global effort to end <b>AIDS</b> as a public health threat by 2030. In addition, the agency is working toward its 2020 90-90-90 targets: for 90% of people living with HIV/AIDS to know their status; for 90% of those diagnosed with infections to receive antiretroviral treatments; and for 90% of patients receiving antiretroviral therapy to have viral suppression. In 2019, the agency disbursed \$207.3 million, up 1.7% from 2018. The top five contributors to UNAIDS in 2019 were the US, Sweden, the Netherlands, the UK, and Norway.</p> <p><b>Region</b><br/>DAH data for UNAIDS in 2019 have unallocated or unspecified regions.</p> | <p><b>Topics from 2016-2020 tweets (no order)</b></p> <p>Access<br/>Africa<br/>Discrimination<br/>HIV/AIDS<br/>Human Rights<br/>Innovation<br/>Prevention<br/>Testing<br/>Treatment<br/>Women</p>          | Ending the AIDS epidemic by 2030.                                                                         | HIV/AIDS prevention, testing, and treatment is consistent across DAH data and tweets.                    | HIV/AIDS prevention, testing, and treatment are consistent across stated and revealed priorities.<br><br>To maximize benefits of their pre-determined goal of ending the AIDS epidemic by 2030, UNAIDS focuses on HIV/AIDS prevention, testing, and treatment. | Yes |
| UNFPA  | <p>"Our goal is to achieve <b>universal access to sexual and reproductive health, realize reproductive rights, and reduce maternal mortality</b> to accelerate progress on the agenda of the Programme of Action of the International Conference on Population and Development (ICPD), to <b>improve the lives of women, adolescents and youth</b>, enabled by population dynamics, human rights and gender equality.</p> <p><b>Priority Areas</b></p> <ul style="list-style-type: none"> <li>• Sexual and reproductive health services and reproductive rights</li> <li>• Adolescent and youth empowerment</li> <li>• Gender equality and women's empowerment</li> <li>• Population data for development"</li> </ul> <p><a href="#">(UNFPA Strategic Plan)</a></p> | <p><b>Health Focus Area</b><br/>The United Nations Population Fund (UNFPA) is the United Nations' <b>sexual and reproductive health</b> agency. UNFPA's programs include the Maternal and Newborn Health Thematic Fund, focused on preventing maternal deaths through strategic interventions. Training midwives and ending fistula, a childbirth injury caused by prolonged obstructed labor, are also part of the <b>Maternal and Newborn Health Thematic Fund</b>. In 2019, UNFPA disbursed \$1.1 billion in DAH, down 1.7% from 2018. Of this, UNFPA received \$466.8 million, or 43.8% from governments. In</p>                                                                                       | <p><b>Topics from 2016-2020 tweets (no order)</b></p> <p>Africa<br/>Child Marriage<br/>Children<br/>Family planning<br/>FGM<br/>Human Rights<br/>Humanitarian Aid<br/>Nutrition<br/>Violence<br/>Women</p> | Universal access to sexual and reproductive health, reproductive rights, maternal mortality, child health | Sexual and reproductive health, and maternal and child health are consistent across DAH data and tweets. | HIV/AIDS prevention, testing, and treatment are consistent across stated and revealed priorities.<br><br>To maximize benefits of their pre-determined goal of ending the AIDS epidemic by 2030, UNAIDS focuses on HIV/AIDS prevention, testing, and treatment. | Yes |

|         |                                                                                                                                                                                                                                                                                                                                                                                                                                                                                                                                                                                                                                                                                                                                                                                                                                                                                                                                                                                                                                                         |                                                                                                                                                                                                                                                                                                                                                                                                                                                                                                                                                                                               |                                                                                                                                                                                                  |                                                                                                                                     |                                                                                                                                    |                                                                                                                                                                                                                                                                                                             |     |
|---------|---------------------------------------------------------------------------------------------------------------------------------------------------------------------------------------------------------------------------------------------------------------------------------------------------------------------------------------------------------------------------------------------------------------------------------------------------------------------------------------------------------------------------------------------------------------------------------------------------------------------------------------------------------------------------------------------------------------------------------------------------------------------------------------------------------------------------------------------------------------------------------------------------------------------------------------------------------------------------------------------------------------------------------------------------------|-----------------------------------------------------------------------------------------------------------------------------------------------------------------------------------------------------------------------------------------------------------------------------------------------------------------------------------------------------------------------------------------------------------------------------------------------------------------------------------------------------------------------------------------------------------------------------------------------|--------------------------------------------------------------------------------------------------------------------------------------------------------------------------------------------------|-------------------------------------------------------------------------------------------------------------------------------------|------------------------------------------------------------------------------------------------------------------------------------|-------------------------------------------------------------------------------------------------------------------------------------------------------------------------------------------------------------------------------------------------------------------------------------------------------------|-----|
|         |                                                                                                                                                                                                                                                                                                                                                                                                                                                                                                                                                                                                                                                                                                                                                                                                                                                                                                                                                                                                                                                         | 2018, the US withheld funding from UNFPA for the third year in a row under the Kemp-Kasten amendment.                                                                                                                                                                                                                                                                                                                                                                                                                                                                                         |                                                                                                                                                                                                  |                                                                                                                                     |                                                                                                                                    |                                                                                                                                                                                                                                                                                                             |     |
|         |                                                                                                                                                                                                                                                                                                                                                                                                                                                                                                                                                                                                                                                                                                                                                                                                                                                                                                                                                                                                                                                         | <u>Region</u><br>DAH data for UNFPA in 2019 have unallocated or unspecified regions.                                                                                                                                                                                                                                                                                                                                                                                                                                                                                                          |                                                                                                                                                                                                  |                                                                                                                                     |                                                                                                                                    |                                                                                                                                                                                                                                                                                                             |     |
| UNICEF  | <p><b>"Vision:</b> Realizing the rights of every child, especially the most disadvantaged.</p> <p><b>Goal areas:</b></p> <ul style="list-style-type: none"> <li>• Every child survives and thrives</li> <li>• Every child learns</li> <li>• Every child is protected from violence and exploitation</li> <li>• Every child lives in a safe and clean environment</li> <li>• Every child has an equitable chance in life" (<a href="#">UNICEF Strategic Plan 2018-2021</a>)</li> </ul>                                                                                                                                                                                                                                                                                                                                                                                                                                                                                                                                                                   | <p><u>Health Focus Area</u><br/>UNICEF provides long-term <b>humanitarian and development assistance to children and mothers</b>, with a specific focus on <b>nutrition, immunization, and HIV/AIDS</b>, as well as <b>emergency (i.e., pandemic) assistance</b>.</p> <p>UNICEF disbursed \$2.6 billion in DAH in 2019, up 12.5% from 2018. Private philanthropies provided UNICEF with \$519.3 million, or 19.8% of its funding in 2019, and the US contributed \$316.9 million, or 12.1%.</p> <p><u>Region</u><br/>DAH data for UNICEF in 2019 have unallocated or unspecified regions.</p> | <p><u>Topics from 2016-2020 tweets (no order)</u></p> <p>Africa<br/>Breastfeeding<br/>Children<br/>Climate Change<br/>Ebola<br/>Education<br/>Human Rights<br/>Online<br/>Violence<br/>Water</p> | <p>Realizing the rights of every child, especially the most disadvantaged.</p> <p>Health related: child health, child mortality</p> | <p>Child and maternal health are consistent across DAH data and tweets.</p>                                                        | <p>Child and maternal health are consistent across stated and revealed priorities.</p> <p>To maximize benefits of their pre-determined goal of realizing the rights of every child, UNICEF focuses on child and maternal health.</p>                                                                        | Yes |
| UNITAID | <p>"Unitaid's Strategy for 2017-2021 is firmly grounded in its Constitution, which states that Unitaid aims to 'contribute to scale up access to treatment for <b>HIV/AIDS, malaria and tuberculosis</b> for the people in developing countries by <b>leveraging price reductions of quality drugs and diagnostics</b>, which currently are unaffordable for most developing countries, and to accelerate the pace at which they are made available.' Innovation, access, and scalability. They guide the design of unitaid's interventions, which</p> <ul style="list-style-type: none"> <li>• Promote innovation. Unitaid connects those who are developing innovations with people who need them the most. Innovation means both using existing commodities in new ways and developing new products and approaches.</li> <li>• Catalyze equitable access to better health products. Unitaid leverages its market expertise and its relationships with partners to design a portfolio of projects that will overcome barriers to access to</li> </ul> | <p><u>Health Focus Area</u><br/>In 2019, Unitaid disbursed \$154.1 million in DAH, up 35.2% from 2018. Projects Unitaid has been working on include a net program to combat malaria and a program to distribute and promote HIV self-testing kits in Africa. US contributed \$316.9 million, or 12.1%.</p> <p><u>Region</u><br/>DAH data for UNITAID in 2019 have unallocated or unspecified regions.</p>                                                                                                                                                                                     | <p><u>Topics from 2016-2020 tweets (no order)</u></p> <p>Access<br/>Cancer<br/>Children<br/>Hepatitis<br/>HIV/AIDS<br/>Malaria<br/>Testing<br/>Treatment<br/>Tuberculosis<br/>Vaccines</p>       | <p>Access to treatment of, affordability of drugs, and innovation in addressing HIV/AIDS, malaria, tuberculosis</p>                 | <p>Increasing access, testing, and treatment of HIV/AIDS, malaria, and tuberculosis are consistent across DAH data and tweets.</p> | <p>HIV/AIDS, malaria, and tuberculosis are consistent across stated and revealed priorities.</p> <p>To maximize benefits of their pre-determined goal of scaling up treatment for HIV/AIDS, malaria, and tuberculosis in developing countries, UNITAID prioritizes HIV/AIDS, malaria, and tuberculosis.</p> | Yes |

|             |                                                                                                                                                                                                                                                                                                                                                                                                                                                                                                                                                                                                                                                                                                                                                                                                                                                                                                                                                                                                                                                                                                                                                                                                                                  |                                                                                                                                                                                                                                                                                                                                                                                                                                                                                                                                              |                                                                                                                                                                                    |                                                                                                  |                                                                                                              |                                                                                                                                                                                                                                                                                                                                                                  |     |
|-------------|----------------------------------------------------------------------------------------------------------------------------------------------------------------------------------------------------------------------------------------------------------------------------------------------------------------------------------------------------------------------------------------------------------------------------------------------------------------------------------------------------------------------------------------------------------------------------------------------------------------------------------------------------------------------------------------------------------------------------------------------------------------------------------------------------------------------------------------------------------------------------------------------------------------------------------------------------------------------------------------------------------------------------------------------------------------------------------------------------------------------------------------------------------------------------------------------------------------------------------|----------------------------------------------------------------------------------------------------------------------------------------------------------------------------------------------------------------------------------------------------------------------------------------------------------------------------------------------------------------------------------------------------------------------------------------------------------------------------------------------------------------------------------------------|------------------------------------------------------------------------------------------------------------------------------------------------------------------------------------|--------------------------------------------------------------------------------------------------|--------------------------------------------------------------------------------------------------------------|------------------------------------------------------------------------------------------------------------------------------------------------------------------------------------------------------------------------------------------------------------------------------------------------------------------------------------------------------------------|-----|
|             | <p>innovative health products</p> <ul style="list-style-type: none"> <li>Create the right conditions for scale up, so better health products reach all people who need them. From conception through implementation, Unitaid works with partners to ensure that projects transition to scale.” (<a href="#">Unitaid Strategy 2017-2021</a>)</li> </ul>                                                                                                                                                                                                                                                                                                                                                                                                                                                                                                                                                                                                                                                                                                                                                                                                                                                                           |                                                                                                                                                                                                                                                                                                                                                                                                                                                                                                                                              |                                                                                                                                                                                    |                                                                                                  |                                                                                                              |                                                                                                                                                                                                                                                                                                                                                                  |     |
| Gavi        | <p>“Our 2016–2020 mission, to <b>save children’s lives and protect people’s health by increasing equitable use of vaccines in lower-income countries</b>, is guided by four strategic goals</p> <ol style="list-style-type: none"> <li>Accelerate equitable uptake and coverage of vaccines.</li> <li>Increase effectiveness and efficiency of immunisation delivery as an integrated part of strengthened health systems.</li> <li>Improve sustainability of national immunisation programmes.</li> <li>Shape markets for vaccines and other immunisation products.</li> </ol> <p>The current five-year strategy was approved by the Board in June 2014 – the full implementation of the strategy will see developing countries immunise 300 million children, saving 5–6 million lives in the long term. <b>Coverage and equity</b> are at the core of our current strategy. While we continue to support countries to introduce new vaccines, our focus is expanding to reach every child with these vaccines. With as many as 20 countries transitioning out of our financial support in this period, ensuring that programmes are sustainable in the long term is essential.” (<a href="#">Gavi Strategy 2016-2020</a>)</p> | <p><u>Health Focus Area</u><br/>In 2019, Gavi channeled \$1.8 billion in development assistance for health to <b>child health</b> (94.4% of Gavi funding) and non-communicable disease-related programs. Top sources of funding for Gavi in 2019 were the Bill &amp; Melinda Gates Foundation, the United States, and the United Kingdom.</p> <p><u>Region</u><br/>In 2017, 52.6% of DAH disbursed by Gavi went to <b>sub-Saharan Africa</b> and 25.5% to South Asia. DAH data for Gavi in 2019 have unallocated or unspecified regions.</p> | <p><u>Topics from 2016-2020 tweets (no order)</u></p> <p>Africa<br/>Cancer<br/>Children<br/>Cholera<br/>Ebola<br/>Measles<br/>Pneumonia<br/>Polio<br/>Poverty<br/>Vaccines</p>     | <p>Increasing overall coverage and equity in vaccinating children in lower-income countries.</p> | <p>Child health, vaccination, infectious diseases, and Africa are consistent across DAH data and tweets.</p> | <p>Child health, vaccination, infectious diseases, and Africa are consistent across stated and revealed priorities.</p> <p>To maximize benefits of their pre-determined goal of “saving children’s lives by increasing equitable use of vaccines in lower-income countries”, Gavi prioritizes child health and vaccination of infectious diseases in Africa.</p> | Yes |
| Global Fund | <p>“The Global Fund Strategy 2017-2022: Investing to End Epidemics outlines our partnership’s bold agenda for 2017-2022 based on an ambitious vision to <b>end the epidemics</b>. These four strategic objectives are at the core of the strategy:</p> <ul style="list-style-type: none"> <li>Maximize impact against <b>HIV, TB, and Malaria</b></li> <li>Promote and protect <b>human rights and gender equality</b></li> <li>Mobilize increased resources</li> <li>Build <b>resilient and sustainable systems for health</b>” (<a href="#">Global</a>)</li> </ul>                                                                                                                                                                                                                                                                                                                                                                                                                                                                                                                                                                                                                                                             | <p><u>Health Focus Area</u><br/>In 2019, the Global Fund channeled a total of \$3.5 billion to programs worldwide. Leading sources of Global Fund contributions were the United States, the United Kingdom, and Japan. The UK provided \$817.1 million or 23.3% to the Global Fund in 2019, more than any other contributor. The US contributed \$636.5 million or 18.1%, Japan contributed \$442.4 million or 12.6%, and Germany</p>                                                                                                        | <p><u>Topics from 2016-2020 tweets (no order)</u></p> <p>Africa<br/>Children<br/>Cholera<br/>Ebola<br/>HIV/AIDS<br/>Malaria<br/>Pneumonia<br/>Polio<br/>Tuberculosis<br/>Women</p> | <p>To end HIV/AIDS, malaria, and tuberculosis epidemics</p>                                      | <p>HIV/AIDS, malaria, tuberculosis, and Africa are consistent across DAH data and tweets.</p>                | <p>HIV/AIDS, malaria, tuberculosis, and Africa are consistent across stated and revealed priorities.</p> <p>To maximize benefits of their pre-determined goal of “ending the epidemics”, the Global Fund prioritizes child health and vaccination of</p>                                                                                                         | Yes |

|            |                                                                                                                                                                                                                                                                                                                                                                                                                                                                                                                                                                                                                                                                                                                                                                                                                                                                                                                                                                                                                                                                                                                                                                                                                                                                                                                                              |                                                                                                                                                                                                                                                                                                                                                                                                                                                                                                                                                                       |                                                                                                                                                                                   |                                                                                                           |                                                                                              |                                                                                                                                                                                                                                                                                                     |            |
|------------|----------------------------------------------------------------------------------------------------------------------------------------------------------------------------------------------------------------------------------------------------------------------------------------------------------------------------------------------------------------------------------------------------------------------------------------------------------------------------------------------------------------------------------------------------------------------------------------------------------------------------------------------------------------------------------------------------------------------------------------------------------------------------------------------------------------------------------------------------------------------------------------------------------------------------------------------------------------------------------------------------------------------------------------------------------------------------------------------------------------------------------------------------------------------------------------------------------------------------------------------------------------------------------------------------------------------------------------------|-----------------------------------------------------------------------------------------------------------------------------------------------------------------------------------------------------------------------------------------------------------------------------------------------------------------------------------------------------------------------------------------------------------------------------------------------------------------------------------------------------------------------------------------------------------------------|-----------------------------------------------------------------------------------------------------------------------------------------------------------------------------------|-----------------------------------------------------------------------------------------------------------|----------------------------------------------------------------------------------------------|-----------------------------------------------------------------------------------------------------------------------------------------------------------------------------------------------------------------------------------------------------------------------------------------------------|------------|
|            | <p><a href="#">Fund Strategy 2017-2022</a>)</p>                                                                                                                                                                                                                                                                                                                                                                                                                                                                                                                                                                                                                                                                                                                                                                                                                                                                                                                                                                                                                                                                                                                                                                                                                                                                                              | <p>contributed \$396.7 million or 11.3%.</p> <p>50.4% of funding were allocated to address <b>HIV/AIDS</b>, 31.7% to <b>Malaria</b>, and 17.8% to <b>Tuberculosis</b>.</p> <p><u>Region</u><br/>In 2019, 72.7% of DAH disbursed by the Global Fund went to <b>sub-Saharan Africa</b> and 10.5% to Southeast Asia, East Asia, and Oceania. DAH data for the Global Fund in 2019 have unallocated or unspecified regions.</p>                                                                                                                                           |                                                                                                                                                                                   |                                                                                                           |                                                                                              | <p>infectious diseases in Africa.</p>                                                                                                                                                                                                                                                               |            |
| <p>CDC</p> | <p>“CDC’s Strategic Framework consists of five core capabilities that enable the agency’s three strategic priorities, all united behind one mission: <b>protect America’s safety, health, and security</b>. Our work is underscored by the agency’s Pledge to the American People.</p> <p><b>Strategic Priorities</b></p> <ul style="list-style-type: none"> <li>• Securing global health and America’s preparedness             <ul style="list-style-type: none"> <li>• By stopping the spread of pandemic contagions, addressing public health terror threats, and protecting people from vector-borne diseases.</li> </ul> </li> <li>• Eliminating disease             <ul style="list-style-type: none"> <li>• By controlling vaccine-preventable disease, targeting Hepatitis C, and reducing the maternal mortality rate.</li> </ul> </li> <li>• Ending epidemics             <ul style="list-style-type: none"> <li>• Such as HIV, decreasing opioid overdoses, improving strategies and interventions to stem seasonal influenza, developing and deploying new answers for antibiotic resistance, and reducing new incidents of diabetes.</li> </ul> </li> </ul> <p><b>Core Capabilities</b></p> <ul style="list-style-type: none"> <li>• World-class data and analytics</li> <li>• State-of-the-art laboratory capacity</li> </ul> | <p><u>Health Focus Area</u><br/>Protecting Americans from Infectious Diseases at Home and Abroad (\$3.0 billion)<br/>Preventing the Leading Causes of Disease, Disability, &amp; Death (\$2.0 billion)<br/>Protecting Americans from Natural Disasters, Terrorist Threats, Environmental &amp; Occupational Hazards (\$1.5 billion)<br/>Monitoring Health &amp; Ensuring Laboratory Excellence (\$496 million)<br/>Cross-cutting Support &amp; PHS Block Grant &amp; Buildings &amp; Facilities (\$357 million)</p> <p><u>Region</u><br/>United States and global</p> | <p><u>Topics from 2016-2020 tweets (no order)</u></p> <p>Children<br/>Diarrhea<br/>E. Coli<br/>influenza<br/>Measles<br/>Prevention<br/>Vaccines<br/>Water<br/>Women<br/>Zika</p> | <p>National security from infectious diseases</p> <p>Securing global health and national preparedness</p> | <p>Protecting the USA from infectious diseases is consistent across DAH data and tweets.</p> | <p>HIV/AIDS, malaria, tuberculosis, and Africa are consistent across stated and revealed priorities.</p> <p>To maximize benefits of their pre-determined goal of “protecting America’s safety, health, and security”, the CDC prioritizes infectious disease protection in the US and globally.</p> | <p>Yes</p> |

|        |                                                                                                                                                                                                                                                                                                                                                                                                                                                                                                                                                                                                                                                                                                                                                                                                                                                                                                                                                                                                                  |                                                                                                                                                                                                                                                                                                                                                                                                                               |                                                                                                                                                                                                  |                                                                                              |                                                                                                           |                                                                                                                      |     |
|--------|------------------------------------------------------------------------------------------------------------------------------------------------------------------------------------------------------------------------------------------------------------------------------------------------------------------------------------------------------------------------------------------------------------------------------------------------------------------------------------------------------------------------------------------------------------------------------------------------------------------------------------------------------------------------------------------------------------------------------------------------------------------------------------------------------------------------------------------------------------------------------------------------------------------------------------------------------------------------------------------------------------------|-------------------------------------------------------------------------------------------------------------------------------------------------------------------------------------------------------------------------------------------------------------------------------------------------------------------------------------------------------------------------------------------------------------------------------|--------------------------------------------------------------------------------------------------------------------------------------------------------------------------------------------------|----------------------------------------------------------------------------------------------|-----------------------------------------------------------------------------------------------------------|----------------------------------------------------------------------------------------------------------------------|-----|
|        | <ul style="list-style-type: none"> <li>Elite public health expertise</li> <li>Responding to outbreaks at their source</li> <li>Global capacity and domestic preparedness" (<a href="#">CDC Strategic Framework</a>)</li> </ul>                                                                                                                                                                                                                                                                                                                                                                                                                                                                                                                                                                                                                                                                                                                                                                                   |                                                                                                                                                                                                                                                                                                                                                                                                                               |                                                                                                                                                                                                  |                                                                                              |                                                                                                           |                                                                                                                      |     |
| EU CDC | <p>“ECDC is an EU agency aimed at <b>strengthening Europe's defences against infectious diseases</b>. The core functions cover a wide spectrum of activities: surveillance, epidemic intelligence, response, scientific advice, microbiology, preparedness, public health training, international relations, health communication, and the scientific journal Eurosurveillance.</p> <p><b>Strategic Work Areas</b></p> <ul style="list-style-type: none"> <li>Providing evidence for effective and efficient decision-making: We support efficient public health decisionmaking by providing <b>timely, accurate and relevant information</b>.</li> <li>Support the <b>strengthening of public health systems</b>: We strengthen European capacities and capabilities effectively prevent and control communicable diseases.</li> <li>Supporting <b>response to threats</b>: We support effective health threats detection, assessment and control.”</li> </ul> <p>(<a href="#">ECDC Annual Report 2019</a>)</p> | <p><b>Health Focus Area</b><br/>All funding is spent on expenses for staff, buildings and equipment, and operations for surveillance, research, and response to infectious disease epidemics.</p> <p><u>Region</u><br/>European Union and global</p>                                                                                                                                                                          | <p><u>Topics from 2016-2020 tweets (no order)</u></p> <p>Ebola<br/>Hepatitis<br/>HIV/AIDS<br/>Influenza<br/>Measles<br/>Outbreaks<br/>Report<br/>Surveillance<br/>Tuberculosis<br/>West Nile</p> | European security from infectious disease                                                    | Infectious disease surveillance, reporting, and research are consistent across DAH data and tweets.       | Infectious disease surveillance, reporting, and research are consistent across stated and revealed priorities.       | Yes |
| NIH    | <p>“NIH’s mission is to seek fundamental knowledge about the nature and behavior of living systems and the application of that knowledge to enhance health, lengthen life, and reduce illness and disability.</p> <p>The goals of the agency are:</p> <ul style="list-style-type: none"> <li>to foster <b>fundamental creative discoveries, innovative research strategies</b>, and their applications as a basis for ultimately <b>protecting and improving health</b>;</li> <li>to develop, maintain, and renew scientific human and physical resources that will <b>ensure the Nation’s capability to prevent disease</b>;</li> <li>to expand the knowledge base in medical and associated sciences in order to enhance the Nation’s economic well-being and ensure a continued high return on the public</li> </ul>                                                                                                                                                                                          | <p><b>Health Focus Area</b><br/>In 2019, NIH had a \$39.2B discretionary budget.</p> <ol style="list-style-type: none"> <li>NCI (14.7%) – cancer</li> <li>NIAID (14.1%) – allergy and infectious disease</li> <li>NHLBI (8.9%) – heart, lung, and blood</li> <li>NIA (7.9%) – instate on aging</li> <li>NIGMS (7.3%) – general medical sciences</li> </ol> <p><u>Region</u><br/>United States (with some global research)</p> | <p><u>Topics from 2016-2020 tweets (no order)</u></p> <p>Africa<br/>Cancer<br/>Funding<br/>Heart Disease<br/>HIV/AIDS<br/>News<br/>Rare Disease<br/>Research<br/>Stress<br/>Veterans</p>         | National security through developing new knowledge in enhancing health and lengthening life. | Research on cancer, HIV/AIDS, heart disease, and rare diseases are consistent across DAH data and tweets. | Research on cancer, HIV/AIDS, heart disease, and rare diseases are consistent across stated and revealed priorities. | Yes |

|      |                                                                                                                                                                                                                                                                                                                                                                                                                                                                                                                                                                                                                                                                                                                                                                                                                                                                                                                                                                                                                                                            |                                                                                                                                                                                                                                                                                                  |                                                                                                                                                                                                        |                                                                                                       |                                                                                            |                                                                                                                                                                                                                                                                                        |     |
|------|------------------------------------------------------------------------------------------------------------------------------------------------------------------------------------------------------------------------------------------------------------------------------------------------------------------------------------------------------------------------------------------------------------------------------------------------------------------------------------------------------------------------------------------------------------------------------------------------------------------------------------------------------------------------------------------------------------------------------------------------------------------------------------------------------------------------------------------------------------------------------------------------------------------------------------------------------------------------------------------------------------------------------------------------------------|--------------------------------------------------------------------------------------------------------------------------------------------------------------------------------------------------------------------------------------------------------------------------------------------------|--------------------------------------------------------------------------------------------------------------------------------------------------------------------------------------------------------|-------------------------------------------------------------------------------------------------------|--------------------------------------------------------------------------------------------|----------------------------------------------------------------------------------------------------------------------------------------------------------------------------------------------------------------------------------------------------------------------------------------|-----|
|      | <p>investment in research; and</p> <ul style="list-style-type: none"> <li>to exemplify and promote the highest level of scientific integrity, public accountability, and social responsibility in the conduct of science.</li> </ul> <p>In realizing these goals, the NIH provides leadership and direction to programs designed to improve the health of the Nation by conducting and supporting research:</p> <ul style="list-style-type: none"> <li>in the <b>causes, diagnosis, prevention, and cure of human diseases;</b></li> <li>in the processes of human growth and development;</li> <li>in the biological effects of environmental contaminants;</li> <li>in the <b>understanding of mental, addictive and physical disorders;</b> and</li> <li>in directing programs for the collection, dissemination, and exchange of information in medicine and health, including the development and support of medical libraries and the training of medical librarians and other health information specialists.</li> </ul>                            |                                                                                                                                                                                                                                                                                                  |                                                                                                                                                                                                        |                                                                                                       |                                                                                            |                                                                                                                                                                                                                                                                                        |     |
| FAO  | <p>"Today, member states face an increasing number of demands and challenges in agricultural development. To support them, FAO has identified five key priorities on which it is best placed to intervene. These priorities, or Strategic Objectives, represent our main areas of work to achieve our <b>vision of a world free from hunger and malnutrition, where food and agriculture help to improve the living standards of all</b>, especially the poorest, in an economically, socially and environmentally sustainable manner – contributing to the implementation of the 2030 Agenda for Sustainable Development.</p> <ol style="list-style-type: none"> <li><b>Help eliminate hunger, food insecurity, and malnutrition</b></li> <li>Make agriculture, forestry, and fisheries more productive and sustainable</li> <li>Reduce rural poverty</li> <li>Enable inclusive and efficient agricultural food systems</li> <li>Increase the resilience of livelihoods to threats and crises" (<a href="#">FAO Strategic Objectives 2019</a>)</li> </ol> | <p><u>Health Focus Area</u><br/>All received funding is spent on staffing and program expenses in addressing hunger, food insecurity, malnutrition, and improving resiliency of food systems.</p> <p><u>Region</u><br/>Funding data for FAO in 2019 have unallocated or unspecified regions.</p> | <p><u>Topics from 2016-2020 tweets (no order)</u></p> <p>Africa<br/>Agriculture<br/>Biodiversity<br/>Climate Change<br/>Families<br/>Farmers<br/>Fisheries<br/>Food Security<br/>Forests<br/>Water</p> | Addressing hunger, food insecurity, and malnutrition through improving food and agricultural systems. | Food insecurity, malnutrition, and food systems are consistent across DAH data and tweets. | Food insecurity, malnutrition, and food systems are consistent across stated and revealed priorities.<br><br>To maximize benefits of their pre-determined goal of a world free from hunger and malnutrition, the FAO prioritizes eliminating hunger, food insecurity, and malnutrition | Yes |
| UNDP | "UNDP's Strategic Plan (2018-2021) has been designed to be                                                                                                                                                                                                                                                                                                                                                                                                                                                                                                                                                                                                                                                                                                                                                                                                                                                                                                                                                                                                 | <u>Total budget allocation</u>                                                                                                                                                                                                                                                                   | <u>Topics from 2016-2020 tweets</u>                                                                                                                                                                    | Poverty eradication,                                                                                  | HIV/AIDS, malaria, and                                                                     | HIV/AIDS, malaria, and                                                                                                                                                                                                                                                                 | Yes |

|     |                                                                                                                                                                                                                                                                                                                                                                                                                                                                                                                                                                                                                                                                                                                                                                                                                                                                                                                                                                                                                                                                                                                                                                                                                                                                                                                       |                                                                                                                                                                                                                                                                                                                                                                                                                                                                                                                                                                                                                             |                                                                                                                                                                                                       |                                                                                                                                                                                                                                                                                                                                                                                                                                 |                                                                                                                     |                                                                                                                                                                                                                                                                                                                                               |     |
|-----|-----------------------------------------------------------------------------------------------------------------------------------------------------------------------------------------------------------------------------------------------------------------------------------------------------------------------------------------------------------------------------------------------------------------------------------------------------------------------------------------------------------------------------------------------------------------------------------------------------------------------------------------------------------------------------------------------------------------------------------------------------------------------------------------------------------------------------------------------------------------------------------------------------------------------------------------------------------------------------------------------------------------------------------------------------------------------------------------------------------------------------------------------------------------------------------------------------------------------------------------------------------------------------------------------------------------------|-----------------------------------------------------------------------------------------------------------------------------------------------------------------------------------------------------------------------------------------------------------------------------------------------------------------------------------------------------------------------------------------------------------------------------------------------------------------------------------------------------------------------------------------------------------------------------------------------------------------------------|-------------------------------------------------------------------------------------------------------------------------------------------------------------------------------------------------------|---------------------------------------------------------------------------------------------------------------------------------------------------------------------------------------------------------------------------------------------------------------------------------------------------------------------------------------------------------------------------------------------------------------------------------|---------------------------------------------------------------------------------------------------------------------|-----------------------------------------------------------------------------------------------------------------------------------------------------------------------------------------------------------------------------------------------------------------------------------------------------------------------------------------------|-----|
|     | <p>responsive to the wide diversity of the countries we serve. The diversity is reflected in three broad development contexts:</p> <ul style="list-style-type: none"> <li>• Eradicate poverty in all its forms and dimensions</li> <li>• Accelerate structural transformations</li> <li>• Build resilience to shocks and crises</li> </ul> <p>To respond to these issues, and better focus its resources and expertise to deliver on the 2030 Agenda, UNDP has identified a set of approaches that we call our Signature Solutions:</p> <ul style="list-style-type: none"> <li>• Keeping people out of POVERTY</li> <li>• GOVERNANCE for peaceful, just, and inclusive societies</li> <li>• Crisis prevention and increased RESILIENCE</li> <li>• ENVIRONMENT: nature-based solutions for development</li> <li>• Clean, affordable ENERGY</li> <li>• Women's empowerment and GENDER equality</li> </ul> <p>In all our activities, we encourage the <b>protection of human rights and the empowerment of women, minorities and the poorest and most vulnerable.</b> (<a href="#">UNDP About us</a>)</p> <p>UNDP is the lead development agency in helping the achievement of the Sustainable Development Goals.</p> <p><b>SDG 3: Ensure healthy lives and promote well-being for all at all ages. (UNDP: SDGs)</b></p> | <p>\$5.7 billion budget in 2019</p> <p><u>By UNDP focus</u><br/>Eradicating poverty (43%), accelerate structural transformations (32%), build resilience to shocks and crises (11.5%), others (13.2%)</p> <p><u>By health focus area</u><br/>SDG3 was allotted \$504M (9% of total budget in 2019 –55% to HIV/AIDS, tuberculosis, and malaria (target 3.3), 26% to universal health coverage (target 3.8), 9% to child mortality (target 3.2)</p> <p><u>Region</u><br/>23% of 2019 budget was allocated to Africa, 19% to Asia and the Pacific, 18% to Latin America and the Caribbean.</p>                                 | <p>(no order)</p> <p>Africa<br/>Children<br/>Climate Change<br/>Education<br/>FGM<br/>Food Security<br/>HIV/AIDS<br/>Malaria<br/>Water<br/>Women</p>                                                  | <p>accelerate structural transformations, build resilience to shocks and crises</p> <p>SDG 3: Ensure healthy lives and promote well-being for all at all ages (includes: maternal mortality, child mortality, HIV/AIDS, tuberculosis, malaria, infectious diseases, mental health, substance abuse, road traffic accidents, sexual and reproductive health, universal health coverage, deaths from environmental pollution)</p> | <p>child and maternal health are consistent across DAH data and tweets.</p>                                         | <p>child and maternal health are consistent across stated and revealed preferences.</p> <p>To maximize benefits of their pre-determined global health goal of ensuring healthy lives and promoting well-being for all, the UNDP prioritizes HIV/AIDS, malaria, and child and maternal health.</p>                                             |     |
| MSF | <p>"Médecins Sans Frontières brings <b>medical humanitarian assistance</b> to victims of <b>conflict, natural disasters, epidemics or healthcare exclusion</b>" (<a href="#">MSF About Us</a>)</p> <p>"Program Priorities</p> <ul style="list-style-type: none"> <li>• Outpatient consultations</li> <li>• Birth assistance (including C-section)</li> <li>• Cholera treatment</li> <li>• Inpatient care</li> <li>• Vaccinations against measles</li> <li>• Malaria treatment</li> <li>• Sexual violence</li> <li>• Meningitis treatment</li> <li>• Inpatient feeding programs for malnourished children</li> <li>• TB treatment</li> <li>• HIV ART treatment</li> <li>• Mental health services</li> <li>• Distribution of relief goods"</li> </ul> <p>(<a href="#">International Activity Report 2019</a>)</p>                                                                                                                                                                                                                                                                                                                                                                                                                                                                                                       | <p><u>Health Focus Area</u><br/>"81% of our financial resources are allocated to fulfilling our social mission: 65% to our humanitarian programmes, 12% to support our projects and programmes, and 4% to awareness-raising, the Access Campaign, and the Drugs for Neglected Diseases initiative (DNDi). The rest is spent on general management and fundraising costs. We also maintain reserves that allow us to respond immediately to a crisis without having to wait for an appeal."</p> <p>Funding is allocated mostly to outpatient consultations, malaria treatment, and birth assistance</p> <p><u>Region</u></p> | <p><u>Topics from 2016-2020 tweets</u><br/>(no order)</p> <p>Africa<br/>Children<br/>Cholera<br/>Ebola<br/>HIV/AIDS<br/>Humanitarian Aid<br/>Refugees<br/>Treatment<br/>Tuberculosis<br/>Violence</p> | <p>Medical humanitarian assistance to victims of conflict, natural disasters, epidemics, or healthcare exclusion.</p>                                                                                                                                                                                                                                                                                                           | <p>Humanitarian aid, HIV/AIDS, infectious diseases, and child health are consistent across DAH data and tweets.</p> | <p>Humanitarian aid, HIV/AIDS, infectious diseases, and child health are consistent across stated and revealed preferences.</p> <p>To maximize benefits of their pre-determined goal of bringing medical humanitarian assistance to victims of crises, MSF prioritizes humanitarian aid, HIV/AIDS, infectious diseases, and child health.</p> | Yes |

|                   |                                                                                                                                                                                                                                                                                                                                                                                                                                                                                                                                                                                                                                                                                                                                                                                                                                                                                           |                                                                                                                                                                                                                                                                                                                                                                                                                                                                                                          |                                                                                                                                                                                                      |                                                                                                                                                                                |                                                                                                                                                                                                                                                                                                               |     |  |
|-------------------|-------------------------------------------------------------------------------------------------------------------------------------------------------------------------------------------------------------------------------------------------------------------------------------------------------------------------------------------------------------------------------------------------------------------------------------------------------------------------------------------------------------------------------------------------------------------------------------------------------------------------------------------------------------------------------------------------------------------------------------------------------------------------------------------------------------------------------------------------------------------------------------------|----------------------------------------------------------------------------------------------------------------------------------------------------------------------------------------------------------------------------------------------------------------------------------------------------------------------------------------------------------------------------------------------------------------------------------------------------------------------------------------------------------|------------------------------------------------------------------------------------------------------------------------------------------------------------------------------------------------------|--------------------------------------------------------------------------------------------------------------------------------------------------------------------------------|---------------------------------------------------------------------------------------------------------------------------------------------------------------------------------------------------------------------------------------------------------------------------------------------------------------|-----|--|
|                   |                                                                                                                                                                                                                                                                                                                                                                                                                                                                                                                                                                                                                                                                                                                                                                                                                                                                                           | Funding data for MSF in 2019 have unallocated or unspecified regions.                                                                                                                                                                                                                                                                                                                                                                                                                                    |                                                                                                                                                                                                      |                                                                                                                                                                                |                                                                                                                                                                                                                                                                                                               |     |  |
| PATH              | <p>"At PATH, we are a global team of innovators working to <b>accelerate health equity</b> so all people and communities can thrive. We advise and partner with public institutions, businesses, grassroots groups, and investors to solve the world's most pressing health challenges." (<a href="#">PATH About Us</a>)</p> <p>"2019 Achievements</p> <ul style="list-style-type: none"> <li>Controlling and eliminating <b>malaria</b></li> <li>Differentiating services for <b>HIV</b> patients</li> <li>Reimagining <b>primary health care</b></li> <li>Creating <b>innovative devices</b> and diagnostics</li> <li>Maximizing impact through <b>policy</b></li> <li>Advancing <b>essential medicines</b></li> <li>Reducing the cost of <b>sanitation</b> and cleaning</li> <li>Expanding access to <b>contraception</b>"</li> </ul> <p>(<a href="#">PATH Annual Report 2019</a>)</p> | <p><b>Health Focus Area</b><br/>Of the \$303 million 2019 budget, 48% was allocated to global health programs, 37% to essential medicines, 11% to technology and innovation, 3.5% to other.</p> <p><b>Region</b><br/>Funding data for PATH in 2019 have unallocated or unspecified regions.</p>                                                                                                                                                                                                          | <p><b>Topics from 2016-2020 tweets (no order)</b></p> <p>Access<br/>Africa<br/>Breastfeeding<br/>Cancer<br/>Children<br/>Ebola<br/>Innovation<br/>Malaria<br/>Pneumonia<br/>Vaccines</p>             | <p>Accelerating health equity</p> <p>Areas:<br/>Malaria, HIV/AIDS, primary health care, health innovations, health policy, essential medicines, sanitation, contraceptives</p> | <p>Malaria, vaccines, and innovations are consistent across DAH data and tweets.</p> <p>To maximize benefits of their pre-determined goal of "accelerating health equity", PATH prioritizes malaria, vaccines, and health innovations.</p>                                                                    | Yes |  |
| Save the Children | <p>"For 100 years, we've been giving <b>children</b> in the U.S. and around the world a <b>healthy start in life, the opportunity to learn and protection from harm</b>. When crisis strikes, we are always among the first to respond and the last to leave. We do whatever it takes to save children, transforming their lives and the future we share." (<a href="#">Save the Children About Us</a>)</p> <p>Focus Areas</p> <ul style="list-style-type: none"> <li>Health and Nutrition</li> <li>Education</li> <li>Hunger and Livelihoods</li> <li>Public Policy and Advocacy</li> <li>HIV/AIDS</li> <li>Child Protection and Rights Governance</li> </ul> <p>(<a href="#">Save the Children Annual Report 2019</a>)</p>                                                                                                                                                              | <p><b>Health Focus Area</b><br/>In 2019, Save the Children had a budget of \$836 million.</p> <ul style="list-style-type: none"> <li>Health &amp; Nutrition (38%)</li> <li>Education (19%)</li> <li>Hunger &amp; Livelihoods (13%)</li> <li>Public Policy &amp; Advocacy (11%)</li> <li>HIV/AIDS (7%)</li> <li>Child Protection &amp; Rights Governance (4%)</li> <li>Other (8%)</li> </ul> <p><b>Region</b><br/>Funding data for Save the Children in 2019 have unallocated or unspecified regions.</p> | <p><b>Topics from 2016-2020 tweets (no order)</b></p> <p>Africa<br/>Children<br/>Donations<br/>Education<br/>Food Security<br/>Humanitarian Aid<br/>Pneumonia<br/>Refugees<br/>Schools<br/>Water</p> | <p>Health related: "giving children a healthy start", "protection from harm"</p>                                                                                               | <p>Child health, nutrition, and food security are consistent across DAH data and tweets.</p> <p>To maximize benefits of their pre-determined global health goals of "giving children a healthy start and protection from harm", Save the Children prioritizes child health, nutrition, and food security.</p> | Yes |  |
| Oxfam             | <p>"Oxfam is a global organization working to <b>end the injustice of poverty</b>. We help people <b>build better futures for themselves, hold the powerful accountable, and save lives in disasters</b>." (<a href="#">About Oxfam</a>)</p> <p>"Across Yemen, Puerto Rico, Bangladesh, Syria, Central America, and Mozambique, among many other places, our work is delivering tangible, measurable impact: providing lifesaving aid, partnering with local organizations to achieve long-term solutions, and using</p>                                                                                                                                                                                                                                                                                                                                                                  | <p><b>Health Focus Area</b><br/>Of the \$88 million 2019 budget, 36% was allocated to emergency response and preparedness, 28% to overcoming poverty, 28% to social justice campaigns, 8% to public education.</p> <p><b>Region</b><br/>Of the budget spent on emergency response and preparedness, 40% was allocated to Africa, 24% to Latin</p>                                                                                                                                                        | <p><b>Topics from 2016-2020 tweets (no order)</b></p> <p>Africa<br/>Climate Change<br/>Ebola<br/>Food Security<br/>Humanitarian Aid<br/>Malaria<br/>Pneumonia<br/>Refugees<br/>Water<br/>Women</p>   | <p>Health related: "help people build better futures for themselves," "save lives in disasters"</p>                                                                            | <p>Emergency response (humanitarian aid, Ebola, food security, and infectious disease) is consistent across DAH data and tweets.</p> <p>To maximize benefits of their pre-determined global health goals of "helping</p>                                                                                      | Yes |  |



|                      |                                                                                                                                                                                                                                                                                                                                                                                                                                                                                                                                                                                                                                                                                                                                                                                                                                                                                                                                                                                                                                                                                                                                                                                                                                                                                                                                                                                                                                                                                                                                                                                                     |                                                                                                                                                                                                                                                                                                                                                                                                                                                                                                                                                                                                                                                                                                                                                                              |                                                                                                                                                                                                                                                                                                                                                                                                                                                                                                                                                                                                                                                                                                                                                                                                                                                                                                                                                                                                                                                                                                                                                                                         |                                                                                                                            |                                                                                                         |                                                                                                                                                                                                                                                                                                                                                                                                                                                                                                           |     |
|----------------------|-----------------------------------------------------------------------------------------------------------------------------------------------------------------------------------------------------------------------------------------------------------------------------------------------------------------------------------------------------------------------------------------------------------------------------------------------------------------------------------------------------------------------------------------------------------------------------------------------------------------------------------------------------------------------------------------------------------------------------------------------------------------------------------------------------------------------------------------------------------------------------------------------------------------------------------------------------------------------------------------------------------------------------------------------------------------------------------------------------------------------------------------------------------------------------------------------------------------------------------------------------------------------------------------------------------------------------------------------------------------------------------------------------------------------------------------------------------------------------------------------------------------------------------------------------------------------------------------------------|------------------------------------------------------------------------------------------------------------------------------------------------------------------------------------------------------------------------------------------------------------------------------------------------------------------------------------------------------------------------------------------------------------------------------------------------------------------------------------------------------------------------------------------------------------------------------------------------------------------------------------------------------------------------------------------------------------------------------------------------------------------------------|-----------------------------------------------------------------------------------------------------------------------------------------------------------------------------------------------------------------------------------------------------------------------------------------------------------------------------------------------------------------------------------------------------------------------------------------------------------------------------------------------------------------------------------------------------------------------------------------------------------------------------------------------------------------------------------------------------------------------------------------------------------------------------------------------------------------------------------------------------------------------------------------------------------------------------------------------------------------------------------------------------------------------------------------------------------------------------------------------------------------------------------------------------------------------------------------|----------------------------------------------------------------------------------------------------------------------------|---------------------------------------------------------------------------------------------------------|-----------------------------------------------------------------------------------------------------------------------------------------------------------------------------------------------------------------------------------------------------------------------------------------------------------------------------------------------------------------------------------------------------------------------------------------------------------------------------------------------------------|-----|
|                      | <p>our strong policy voice to advocate for change.</p> <p><b>Program Services</b></p> <ul style="list-style-type: none"> <li>• Saving Lives: Emergency Response and Preparedness</li> <li>• Programs to overcome poverty</li> <li>• Campaigning for social justice</li> <li>• Public education”</li> </ul> <p>(<a href="#">Oxfam Annual Report 2019</a>)</p>                                                                                                                                                                                                                                                                                                                                                                                                                                                                                                                                                                                                                                                                                                                                                                                                                                                                                                                                                                                                                                                                                                                                                                                                                                        | America and the Caribbean, and 13% to Asia and the Pacific                                                                                                                                                                                                                                                                                                                                                                                                                                                                                                                                                                                                                                                                                                                   |                                                                                                                                                                                                                                                                                                                                                                                                                                                                                                                                                                                                                                                                                                                                                                                                                                                                                                                                                                                                                                                                                                                                                                                         |                                                                                                                            |                                                                                                         | people build better futures for themselves” and “saving lives in disasters”, Oxfam prioritizes emergency response, humanitarian aid, Ebola, food security, and infectious diseases.                                                                                                                                                                                                                                                                                                                       |     |
| Global health system | <p><b>WHO constitution (1948):</b> “Health for All” and the right to the highest attainable standard of health.</p> <p><b>Declaration of Alma-Ata (1978):</b> universal access to primary health care.</p> <p><b>MDGs (2000):</b> reduce child mortality (4), improve maternal health (5), combat HIV/AIDS and other diseases (6)</p> <p><b>SDGs (2015) [Relevant to study’s time period]:</b> good health and well-being (3)</p> <ul style="list-style-type: none"> <li>• By 2030, reduce the global <b>maternal mortality</b> ratio to less than 70 per 100,000 live births (3.1)</li> <li>• By 2030, end <b>preventable deaths of newborns and children</b> under 5 years of age, with all countries aiming to reduce neonatal mortality to at least as low as 12 per 1,000 live births and under-5 mortality to at least as low as 25 per 1,000 live births (3.2)</li> <li>• By 2030, end the epidemics of <b>AIDS, tuberculosis, malaria</b> and <b>neglected tropical diseases</b> and combat <b>hepatitis</b>, water-borne diseases and other <b>communicable diseases</b> (3.3)</li> <li>• By 2030, reduce by one third premature mortality from <b>non-communicable diseases</b> through prevention and treatment and promote <b>mental health and well-being</b> (3.4)</li> <li>• Strengthen the prevention and treatment of <b>substance abuse</b>, including narcotic drug abuse and harmful use of alcohol (3.5)</li> <li>• By 2020, halve the number of global deaths and injuries from <b>road traffic accidents</b> (3.6)</li> <li>• By 2030, ensure universal access to</li> </ul> | <p><u>Health Focus Areas</u></p> <p>Of the \$41 billion DAH transferred across all global health actors in 2019, 24% was allocated to <b>HIV/AIDS</b>, 21% to <b>newborn and child health</b>, 14% to <b>health system strengthening</b>, 12% to <b>reproductive and maternal health</b>, 6% to other infectious diseases, 6% to malaria, 4% to tuberculosis, and 2% to non-communicable diseases.</p> <p><u>Region</u></p> <p>Funding data in 2019 have unallocated or unspecified regions.</p> <p>In 2017, 33% of all DAH funding was allocated to <b>sub-Saharan Africa</b>, 5% to Southeast Asia, 5% to South Asia, 4% to North Africa and the Middle East, 3% to Latin America and the Caribbean, 2% to Europe and Central Asia, 15% globally, and 32% unallocated.</p> | <p><u>Most common topics from 2016-2020 across 20 key actors</u> (number in parenthesis indicates count of actors that had the topic as a priority from 2016-2020 tweets)</p> <ol style="list-style-type: none"> <li>1. Africa (17),</li> <li>2. Children (15),</li> <li>3. HIV/AIDS (11),</li> <li>4. Women (10),</li> <li>5. Ebola (9),</li> <li>6. Water (9),</li> <li>7. Food security (7),</li> <li>8. Humanitarian aid (7),</li> <li>9. Malaria (7),</li> <li>10. Education (6),</li> <li>11. Climate change (5),</li> <li>12. Pneumonia (5),</li> <li>13. Breastfeeding (4),</li> <li>14. Cancer (4),</li> <li>15. Measles (4),</li> <li>16. Polio (4),</li> <li>17. Tuberculosis (4),</li> <li>18. Vaccines (4),</li> <li>19. Access (3),</li> <li>20. Agriculture (3),</li> <li>21. Cholera (3),</li> <li>22. Human Rights (3),</li> <li>23. Mothers (3),</li> <li>24. Refugees (3),</li> <li>25. Treatment (3),</li> <li>26. Violence (3),</li> <li>27. FGM (2),</li> <li>28. Hepatitis (2),</li> <li>29. Influenza (2),</li> <li>30. Innovation (2),</li> <li>31. Poverty (2),</li> <li>32. Prevention (2),</li> <li>33. Sanitation (2),</li> <li>34. Testing (2)</li> </ol> | <p>Health for all and the right to highest attainable standard of health.</p> <p>9 important target areas under SDG 3.</p> | HIV/AIDS, child and maternal health, and infectious diseases are consistent across DAH data and tweets. | <p>HIV/AIDS, child and maternal health, and infectious diseases are consistent across stated and revealed priorities.</p> <p>To maximize benefits of the pre-determined goal of “health for all” and “SDG3: good health and well-being”, the global health system prioritizes 3 of the 9 target areas of SDG 3: HIV/AIDS, child and maternal health, and infectious diseases.</p> <p><b>Note:</b> These benefit-maximizing priorities are the same top priorities of the three funding organizations.</p> | Yes |

1  
2  
3  
4  
5  
6  
7  
8  
9  
10  
11  
12  
13  
14  
15  
16  
17  
18  
19  
20  
21  
22  
23  
24  
25  
26  
27  
28  
29  
30  
31  
32  
33  
34  
35  
36  
37  
38  
39  
40  
41  
42  
43  
44  
45  
46  
47  
48  
49  
50  
51  
52  
53  
54  
55  
56  
57  
58  
59  
60

|  |                                                                                                                                                                                                                                                                                                                                                                                                                                                                                                                                                                                                                                                                               |  |  |  |  |  |  |
|--|-------------------------------------------------------------------------------------------------------------------------------------------------------------------------------------------------------------------------------------------------------------------------------------------------------------------------------------------------------------------------------------------------------------------------------------------------------------------------------------------------------------------------------------------------------------------------------------------------------------------------------------------------------------------------------|--|--|--|--|--|--|
|  | <p><b>sexual and reproductive health-care services</b>, including for family planning, information and education, and the integration of reproductive health into national strategies and programmes (3.7)</p> <ul style="list-style-type: none"> <li>• Achieve <b>universal health coverage</b>, including financial risk protection, access to quality essential health-care services and access to safe, effective, quality and affordable essential medicines and vaccines for all (3.8)</li> <li>• By 2030, substantially reduce the number of <b>deaths and illnesses from hazardous chemicals and air, water and soil pollution and contamination</b> (3.9)</li> </ul> |  |  |  |  |  |  |
|--|-------------------------------------------------------------------------------------------------------------------------------------------------------------------------------------------------------------------------------------------------------------------------------------------------------------------------------------------------------------------------------------------------------------------------------------------------------------------------------------------------------------------------------------------------------------------------------------------------------------------------------------------------------------------------------|--|--|--|--|--|--|

**Supplementary Table 2. Breakdown of Collected Tweets by Actor and Month.** Total tweets and average tweets per month for each of the 20 global health actors.

| Global Health Actor                                        | Total Tweets  | Average Tweets per Month |
|------------------------------------------------------------|---------------|--------------------------|
| World Health Organization                                  | 10,827        | 722                      |
| Oxfam International                                        | 5,694         | 380                      |
| Doctors Without Borders (MSF)                              | 5,553         | 370                      |
| UN Children's Fund (UNICEF)                                | 5,395         | 360                      |
| World Bank                                                 | 5,365         | 358                      |
| UN Development Programme (UNDP)                            | 4,912         | 327                      |
| UN Population Fund (UNFPA)                                 | 3,908         | 261                      |
| UK Department of International Development                 | 3,823         | 255                      |
| Centers for Disease Control and Prevention (CDC)           | 3,701         | 247                      |
| United States Agency for International Development (USAID) | 3,604         | 240                      |
| Food and Agriculture Organization (FAO)                    | 3,263         | 218                      |
| Save the Children                                          | 3,121         | 208                      |
| Gavi, the Vaccine Alliance                                 | 2,739         | 183                      |
| National Institutes of Health (NIH)                        | 2,664         | 178                      |
| Joint UN Programme on HIV/AIDS (UNAIDS)                    | 2,214         | 148                      |
| PATH                                                       | 1,954         | 130                      |
| Global Fund                                                | 1,727         | 115                      |
| European Centre for Disease Prevention and Control (ECDC)  | 1,311         | 87                       |
| Gates Foundation                                           | 1,249         | 83                       |
| Unitaid                                                    | 1,217         | 81                       |
| <b>Total</b>                                               | <b>74,241</b> | <b>4,949</b>             |

**Supplementary Table 3. Breakdown of Collected Tweets by Year and Month** Tweets per month and per year for all the tweets collected.

|              | Tweets per Month | Tweets per Year |
|--------------|------------------|-----------------|
| 2016         |                  | 5,973           |
| November     | 5,973            |                 |
| 2017         |                  | 21,193          |
| February     | 4,474            |                 |
| May          | 5,582            |                 |
| August       | 5,103            |                 |
| November     | 6,034            |                 |
| 2018         |                  | 18,562          |
| February     | 4,145            |                 |
| May          | 4,965            |                 |
| August       | 4,205            |                 |
| November     | 5,247            |                 |
| 2019         |                  | 17,884          |
| February     | 4,500            |                 |
| May          | 4,886            |                 |
| August       | 3,987            |                 |
| November     | 4,511            |                 |
| 2020         |                  | 10,629          |
| February     | 4,446            |                 |
| May          | 6,183            |                 |
| <b>Total</b> | <b>74,241</b>    | <b>74,241</b>   |

**Supplementary Table 4. Priority Similarity Matrix** Scores are generated by comparing the list of 10 health priorities of actor A with that of actor B and the number of matching priorities is counted. Topic similarity scores range from 0-10.

|                   | USA | UK | BMGF | WHO | World Bank | UNAIDS | UNFPA | UNICEF | UNITAID | GAVI | Oxfam | Global Fund | CDC | EU CDC | NIH | FAO | UNDP | MSF | PATH | Save the Children |
|-------------------|-----|----|------|-----|------------|--------|-------|--------|---------|------|-------|-------------|-----|--------|-----|-----|------|-----|------|-------------------|
| USA               |     | 7  | 6    | 5   | 6          | 3      | 4     | 4      | 2       | 2    | 5     | 4           | 3   | 1      | 2   | 3   | 7    | 4   | 2    | 6                 |
| UK                | 7   |    | 4    | 4   | 6          | 2      | 3     | 5      | 2       | 3    | 5     | 4           | 2   | 2      | 2   | 4   | 6    | 5   | 3    | 6                 |
| BMGF              | 6   | 4  |      | 8   | 4          | 3      | 3     | 4      | 3       | 3    | 3     | 6           | 2   | 1      | 2   | 1   | 6    | 3   | 4    | 3                 |
| WHO               | 5   | 4  | 8    |     | 3          | 3      | 3     | 4      | 3       | 5    | 4     | 7           | 3   | 3      | 2   | 1   | 5    | 4   | 5    | 2                 |
| World Bank        | 6   | 6  | 4    | 3   |            | 2      | 4     | 4      | 1       | 3    | 6     | 3           | 3   | 0      | 1   | 5   | 6    | 3   | 2    | 5                 |
| UNAIDS            | 3   | 2  | 3    | 3   | 2          |        | 3     | 2      | 4       | 1    | 2     | 3           | 2   | 1      | 2   | 1   | 3    | 3   | 3    | 1                 |
| UNFPA             | 4   | 3  | 3    | 3   | 4          | 3      |       | 4      | 1       | 2    | 3     | 3           | 2   | 0      | 1   | 1   | 4    | 4   | 2    | 3                 |
| UNICEF            | 4   | 5  | 4    | 4   | 4          | 2      | 4     |        | 1       | 3    | 4     | 3           | 2   | 1      | 1   | 3   | 5    | 4   | 4    | 4                 |
| UNITAID           | 2   | 2  | 3    | 3   | 1          | 4      | 1     | 1      |         | 3    | 1     | 4           | 2   | 3      | 2   | 0   | 3    | 4   | 5    | 1                 |
| GAVI              | 2   | 3  | 3    | 5   | 3          | 1      | 2     | 3      | 3       |      | 3     | 6           | 3   | 2      | 2   | 1   | 2    | 4   | 5    | 2                 |
| Oxfam             | 5   | 5  | 3    | 4   | 6          | 2      | 3     | 4      | 1       | 3    |       | 5           | 2   | 1      | 1   | 4   | 6    | 4   | 3    | 5                 |
| Global Fund       | 4   | 4  | 6    | 7   | 3          | 3      | 3     | 3      | 4       | 6    | 5     |             | 2   | 3      | 2   | 1   | 5    | 6   | 4    | 2                 |
| CDC               | 3   | 2  | 2    | 3   | 3          | 2      | 2     | 2      | 2       | 3    | 2     | 2           |     | 2      | 0   | 1   | 3    | 1   | 2    | 2                 |
| EU CDC            | 1   | 2  | 1    | 3   | 0          | 1      | 0     | 1      | 3       | 2    | 1     | 3           | 2   |        | 1   | 0   | 1    | 3   | 1    | 0                 |
| NIH               | 2   | 2  | 2    | 2   | 1          | 2      | 1     | 1      | 2       | 2    | 1     | 2           | 0   | 1      |     | 1   | 2    | 2   | 2    | 1                 |
| FAO               | 3   | 4  | 1    | 1   | 5          | 1      | 1     | 3      | 0       | 1    | 4     | 1           | 1   | 0      | 1   |     | 4    | 1   | 1    | 3                 |
| UNDP              | 7   | 6  | 6    | 5   | 6          | 3      | 4     | 5      | 3       | 2    | 6     | 5           | 3   | 1      | 2   | 4   |      | 3   | 3    | 5                 |
| MSF               | 4   | 5  | 3    | 4   | 3          | 3      | 4     | 4      | 4       | 4    | 4     | 6           | 1   | 3      | 2   | 1   | 3    |     | 3    | 4                 |
| PATH              | 2   | 3  | 4    | 5   | 2          | 3      | 2     | 4      | 5       | 5    | 3     | 4           | 2   | 1      | 2   | 1   | 3    | 3   |      | 3                 |
| Save the Children | 6   | 6  | 3    | 2   | 5          | 1      | 3     | 4      | 1       | 2    | 5     | 2           | 2   | 0      | 1   | 3   | 5    | 4   | 3    |                   |

**Supplementary Table 5. Types of Power.** A summary of the four types of power as presented by Barnett and Duvall (2005) with examples in global health.

| Power Type          | Relational specificity | Power works through...           | Definition according to Barnett & Duvall (2005)                                                                          | Global Health Example                                                                                                                                            |
|---------------------|------------------------|----------------------------------|--------------------------------------------------------------------------------------------------------------------------|------------------------------------------------------------------------------------------------------------------------------------------------------------------|
| Compulsory Power    | Direct                 | Interactions of specific actors  | "Direct control of one actor over the conditions of existence or the actions of another." (p. 48)                        | Donor countries dictate the conditions in low and middle-income countries (LMICs) through dictating requirements in development aid.                             |
| Institutional Power | Diffuse                | Interactions of specific actors  | "Control actors exercise indirectly over others through diffuse relations of interactions." (p. 43)                      | High-income countries control funding allocations for LMICs through institutional power via their contributions to the WHO and other multilateral organizations. |
| Structural Power    | Direct                 | Social relations of constitution | "Constitution of subjects' capacities in direct structural relation to one another." (p. 43)                             | The structural and historical disempowerment of indigenous populations have resulted in their disproportionate outcomes in health.                               |
| Productive Power    | Diffuse                | Social relations of constitution | "Power [that] works through diffuse constitutive relations to produce the situated social capacities of actors." (p. 48) | High-income countries direct what research institutions prioritize and study, and ultimately determine what health issues are addressed.                         |

# BMJ Open

## Examining power dynamics in global health governance using topic modeling and network analysis

|                                 |                                                                                                                                                                                                                                                                                                 |
|---------------------------------|-------------------------------------------------------------------------------------------------------------------------------------------------------------------------------------------------------------------------------------------------------------------------------------------------|
| Journal:                        | <i>BMJ Open</i>                                                                                                                                                                                                                                                                                 |
| Manuscript ID                   | bmjopen-2021-054470.R1                                                                                                                                                                                                                                                                          |
| Article Type:                   | Original research                                                                                                                                                                                                                                                                               |
| Date Submitted by the Author:   | 25-Nov-2021                                                                                                                                                                                                                                                                                     |
| Complete List of Authors:       | Bermudez, Gian Franco; University of Pennsylvania, School of Social Policy and Practice<br>Prah, Jennifer; University of Pennsylvania, School of Social Policy and Practice                                                                                                                     |
| <b>Primary Subject Heading</b>: | Global health                                                                                                                                                                                                                                                                                   |
| Secondary Subject Heading:      | Health policy, Ethics, Public health                                                                                                                                                                                                                                                            |
| Keywords:                       | Health policy < HEALTH SERVICES ADMINISTRATION & MANAGEMENT, International health services < HEALTH SERVICES ADMINISTRATION & MANAGEMENT, Public health < INFECTIOUS DISEASES, Information technology < BIOTECHNOLOGY & BIOINFORMATICS, Rationing < HEALTH SERVICES ADMINISTRATION & MANAGEMENT |
|                                 |                                                                                                                                                                                                                                                                                                 |

SCHOLARONE™  
Manuscripts

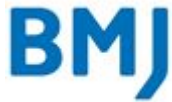

I, the Submitting Author has the right to grant and does grant on behalf of all authors of the Work (as defined in the below author licence), an exclusive licence and/or a non-exclusive licence for contributions from authors who are: i) UK Crown employees; ii) where BMJ has agreed a CC-BY licence shall apply, and/or iii) in accordance with the terms applicable for US Federal Government officers or employees acting as part of their official duties; on a worldwide, perpetual, irrevocable, royalty-free basis to BMJ Publishing Group Ltd ("BMJ") its licensees and where the relevant Journal is co-owned by BMJ to the co-owners of the Journal, to publish the Work in this journal and any other BMJ products and to exploit all rights, as set out in our [licence](#).

The Submitting Author accepts and understands that any supply made under these terms is made by BMJ to the Submitting Author unless you are acting as an employee on behalf of your employer or a postgraduate student of an affiliated institution which is paying any applicable article publishing charge ("APC") for Open Access articles. Where the Submitting Author wishes to make the Work available on an Open Access basis (and intends to pay the relevant APC), the terms of reuse of such Open Access shall be governed by a Creative Commons licence – details of these licences and which [Creative Commons](#) licence will apply to this Work are set out in our licence referred to above.

Other than as permitted in any relevant BMJ Author's Self Archiving Policies, I confirm this Work has not been accepted for publication elsewhere, is not being considered for publication elsewhere and does not duplicate material already published. I confirm all authors consent to publication of this Work and authorise the granting of this licence.



1  
2  
3  
4 **Title:** Examining power dynamics in global health governance  
5 using topic modeling and network analysis  
6  
7

8 **Authors:** Gian Franco Bermudez<sup>1</sup>, Jennifer Prah Ruger<sup>2</sup>  
9

10 **Affiliations:**  
11

12  
13 <sup>1</sup>University of Pennsylvania, School of Social Policy and Practice, Philadelphia,  
14 Pennsylvania, United States  
15

16 <sup>2</sup>University of Pennsylvania, School of Social Policy and Practice and Perelman School  
17 of Medicine, Philadelphia, Pennsylvania, United States  
18

19 **Correspondence to:**  
20

21 Dr. Jennifer Prah Ruger

22 Email: jenpr@upenn.edu

23 Address: 3701 Locust Walk, Caster Building, D-4, Philadelphia, PA 19104-6214

24 Office Phone: +1-215-746-1330  
25  
26

27 **Keywords:** Health policy, international health services, public health, information  
28 technology, rationing  
29

30 **Word Count:** 4,664  
31  
32  
33  
34  
35  
36  
37  
38  
39  
40  
41  
42  
43  
44  
45  
46  
47  
48  
49  
50  
51  
52  
53  
54  
55  
56  
57  
58  
59  
60

## Structured Abstract:

**Objectives:** Despite increases in global health actors and funding levels, health inequities persist. We empirically tested whether global health governance (GHG) operates under the Rational Actor Model (RAM) and characterized GHG power dynamics.

**Design:** We collected approximately 75,000 tweets of 20 key global health actors, between 2016 and 2020 using Twitter API. We generated priorities from tweets collected using a topic modeling algorithm. Priorities from tweets were compared with stated priorities from content analyses of policy documents and with revealed priorities from network analyses of development assistance for health (DAH) funding data. Comparing priorities derived from Twitter, policy documents, and DAH funding data, we are able to test if GHG operates under RAM and to characterize power dynamics in GHG.

**Participants:** 20 key global health actors were identified based on consensus of 3 peer-reviewed articles mapping global health networks. All tweets of global health actors were collected in three-month intervals from November 2016 to May 2020. Policy documents and DAH financial data for each actor were collected for the same time period.

**Results:** We find all 20 actors and the global health system collectively fulfill the 3 conditions of RAM based on stated and revealed priorities. We also find compulsory and institutional power asymmetries in GHG. Funding organizations have compulsory power over channels of DAH and implementing institutions they directly fund. Funding organizations also have transitive influence over implementing institutions receiving DAH funding.

**Conclusions:** GHG operates under RAM, the rational choice for all actors is to align their priorities with the priorities of wealthy funding organizations. Priorities of the entire global health system are determined by the priorities of wealthy funding organizations that have compulsory and institutional power over other actors. If health inequities are to be addressed, a reassessment of current global health governance is imperative.

## Strengths and limitations of this study:

- This study utilizes an alternative methodology of using Twitter data in understanding global health governance and priority-setting.
- This study triangulates findings from multiple data sources to test the rational actor model and to characterize power asymmetries in global health governance.
- Because the scope of this study is from 2016 to 2020, the findings may not be fully representative of global health governance during the COVID-19 pandemic.
- Only the key 20 actors of the hundreds of global health actors today were included in the study.

## INTRODUCTION

The turn of the 21st century introduced an unprecedented volume of new public and private actors in global health accompanied by stratospheric levels of funding.[1] While some argue that this multiplicity of new actors promotes cooperation, what persists is a politically fragmented network of actors with competing priorities and preferences.[2–4] Academics studying the complex network of global health actors have described it as a “congested” and “chaotic” network that causes inefficiencies in the practice and delivery of global health programs and aid.[5]

Inequities in global health have increasingly been attributed to the actions of transnational actors with varying degrees of power and divergent interests.[6] While more actors have entered global health with ostensible benevolent purposes, health inequities and inefficiencies in delivery still exist today. Fierce competition among donor priorities and requirements overwhelms the institutional capacities of recipient countries,[7,8] disrupts national health planning,[9] delays the delivery of aid,[10] and creates duplications and resource waste.[11,12] Paradoxically, despite the exponential increases in global health actors and funding, preventable global health inequities have persisted. Some argue that, to an extent, the multiplicity and fragmentation of global health actors contribute to the persistence of inequities and inefficiencies in global health.

Researchers have presented at least two arguments attempting to understand this paradox through the lens of economics, politics, and power. First, global health governance (GHG) has been theorized as operating under the rational actor model (RAM) where “each actor has its own set of goals and objectives, and these actors take actions based on analysis of the costs and benefits of various available options.”[13] With each actor acting on their own set of explicit goals in the form of mission statements, bylaws, and other founding documents, and implicit goals revealed from past decisions and behaviors, prioritization in GHG is not based on a shared ethical commitment to a common global health goal co-created by various health actors but is based on the aggregation of individual explicit and implicit objectives. GHG based on the RAM fails to “justify an obligation to help meet the health needs of others” and may have contributed to the persistence of global health inequities.[13]

Second, the Lancet-University of Oslo Commission on Global Governance for Health (2014) argues that “power asymmetry and global social norms limit the range of choice and constrain action on health inequity.”[6] The actions of powerful global health actors in pursuit of their own interests “are not designed to harm health but can have negative side-effects” that may have contributed to the persistence of inequities.[6] The lack of power of global health beneficiaries and smaller health actors, and the outsized wielded power of large global health funders may also have contributed to the slow rate of reduction in global health inequities.

The argument that GHG operates under the RAM and the Commission on Global Governance for Health’s argument about power asymmetry are mainly theoretical ideas about the behaviors of global health actors founded on a collection of studies within specific nations, regions, or institutions. What is necessary is empirical evidence at the global level that can confirm, deny or recharacterize these characterizations of how

global health currently operates. Empirical evidence at the global level eliminates doubts of how decisions are currently made in global health and can guide GHG towards addressing the world's inequities in health.

We aim to empirically test the following research questions at the global level: (1) does GHG operate under the RAM? and (2) how can we characterize power dynamics in GHG?

We hypothesize that GHG operates under RAM and that there are power asymmetries in GHG that limit the range of health priorities. We analyzed empirical evidence from Twitter, funding data, and policy documents at the global level to test whether GHG operates under RAM and to characterize the power dynamics in GHG.

## METHODS

We test if GHG operates under the RAM and characterize the power dynamics in GHG through the lens of global health priority-setting. All global health actors have certain preferences for health issues and act in alignment with these priorities.

Priorities can either be stated or revealed. Stated priorities are those preferences explicitly stated in a health actor's founding documents, websites, and annual reports. The mission statements and the health areas each actor explicitly mention in their official documents and websites are stated priorities. Revealed priorities are preferences that are gleaned from records of past behaviors and choices. Past health funding allocations and accounts of actually implemented programs and policies are revealed priorities. Revealed priorities may or may not be aligned with stated priorities.

We use evidence for both stated and revealed priorities from 2016 to 2020 to test both of our research questions.

### Study Sample

We identified 20 key global health actors based on a consensus among three past studies that mapped the global health network using quantitative and qualitative methodologies.[4, 14, 15] As shown in Table 1, the key global health actors were categorized based on their nature of work in global health. Global health actors were either funding organizations, channels of developmental assistance for health (DAH) or implementing institutions. While most actors fall into more than one of these categories in practice, for the integrity of this analysis, organizations were limited to only one category based on the nature of their main line of work.

**Table 1. Summary of Global Health Actors.** Characteristics of the 20 global health actors analyzed in this study.

| Nature of Work in Global Health                 | Organizational Category       | Twitter Username | Global Health Actor                                 | Number of Twitter Followers (as of October 2021) |
|-------------------------------------------------|-------------------------------|------------------|-----------------------------------------------------|--------------------------------------------------|
| Channels of Developmental Assistance for Health | Global health initiative      | gavi             | Gavi, the Vaccine Alliance                          | 153,000                                          |
|                                                 |                               | UNITAID          | Unitaid                                             | 17,200                                           |
|                                                 |                               | GlobalFund       | Global Fund to Fight AIDS, Tuberculosis and Malaria | 240,100                                          |
|                                                 | Multilateral Development Bank | WorldBank        | World Bank                                          | 3,500,000                                        |
|                                                 | United Nations System         | WHO              | World Health Organization                           | 10,000,000                                       |

|                                  |                            |                 |                                                                    |           |
|----------------------------------|----------------------------|-----------------|--------------------------------------------------------------------|-----------|
|                                  |                            | UNAIDS          | Joint United Nations Programme on HIV/AIDS (UNAIDS)                | 286,800   |
|                                  |                            | UNFPA           | United Nations Population Fund (UNFPA)                             | 260,800   |
|                                  |                            | UNICEF          | United Nations Children's Fund (UNICEF)                            | 8,900,000 |
| <b>Funding Organizations</b>     | National Government        | USAID           | United States Agency for International Development (USAID)         | 843,200   |
|                                  |                            | DFID_UK*        | United Kingdom Department for International Development (UK DFID)* | 1,000,000 |
|                                  | Philanthropic Organization | gatesfoundation | Bill and Melinda Gates Foundation                                  | 2,100,000 |
| <b>Implementing Institutions</b> | Global CSO/NGO             | MSF             | Doctors Without Borders (MSF)                                      | 165,100   |
|                                  |                            | PATHtweets      | PATH                                                               | 59,500    |
|                                  |                            | SavetheChildren | Save the Children                                                  | 2,700,000 |
|                                  |                            | Oxfam           | Oxfam International                                                | 836,300   |
|                                  | United Nations System      | FAO             | Food and Agriculture Organization (FAO)                            | 469,600   |
|                                  |                            | UNDP            | United Nations Development Programme (UNDP)                        | 1,600,000 |
|                                  | National Government        | CDCgov          | Centers for Disease Control and Prevention (CDC)                   | 4,300,000 |
|                                  |                            | ECDC_EU         | European Centre for Disease Prevention and Control (ECDC)          | 90,600    |
|                                  |                            | NIH             | National Institutes of Health (NIH)                                | 1,400,000 |

\* UK DFID is now the Foreign, Commonwealth, and Development Office. During the time of the analysis, the UK's agency for aid was known as DFID.

## Patient and public involvement

Patients and the public were not involved in the development of the research questions and outcome measures.

## Data Sources

We analyze stated and revealed priorities of 20 key global health actors from three data sources – policy documents, DAH funding data, and tweets. Table 2 summarizes each data source, how they were collected, how they were analyzed, and what types of priorities can be derived.

**Table 2. Summary of Data Source, Collection, and Analysis.** Description of how data is collected and analyzed in the study.

| Data Source      | Data Collection                                                                                                                       | Analysis                                                       | Type of Priorities Derived from Source |
|------------------|---------------------------------------------------------------------------------------------------------------------------------------|----------------------------------------------------------------|----------------------------------------|
| Policy Documents | Manual collection of annual reports, policy documents, and official communications from official websites of each global health actor | Manual content analysis                                        | Stated                                 |
| DAH Funding Data | Queried funding allocation data of each global health actor from the International Health Metrics and Evaluation (IHME) DAH Database  | Descriptive statistics; network analysis                       | Revealed                               |
| Twitter Data     | Collected all the tweets of each global health actor from November 2016 to May 2020                                                   | Natural language processing (topic modeling); network analysis | Revealed                               |

|  |                                                |  |  |
|--|------------------------------------------------|--|--|
|  | in three month intervals using the Twitter API |  |  |
|--|------------------------------------------------|--|--|

### **Drawing stated priorities from policy documents**

Stated priorities are obtained from a manual content analysis of policy documents, annual reports, and official websites of global health actors.

Available policy documents, annual reports, and relevant official communications from the websites of each global health actor within the timeframe of the study were collected. Documents not published between 2016 and 2020 were not collected. Manual content analysis was conducted to evaluate the available policy documents for each global health actor and identify their respective stated priorities.

The stated priorities drawn from these documents were commonly obtained from official statements that fall under the following headings: “strategic priorities,” “program priorities,” “strategic objectives,” “focus areas,” “strategic work areas,” “program focus,” “Strategy 20XX-20XX,” “strategic goals,” “priority areas,” among others. The first column of Supplementary Table 1 contains the stated priorities obtained from each actor.

### **Deriving revealed priorities from funding data**

Revealed priorities are derived using a network analysis and descriptive statistics of financial flows in DAH funding data. To obtain the revealed priorities of each global health actor, we use topic modeling in natural language processing (NLP) and a network analysis of the tweets for each global health actor. Further explanation of data collection from each source follows.

Data from the Institute for Health Metrics and Evaluation’s (IHME) Developmental Assistance for Health Database was collected for 2019.[16] The database includes approximately 800,000 transactions of financing for health programs and aid from funding organizations to channels of DAH and to implementing countries.

Descriptive statistics were conducted to determine the allocations of funding for each health area and geographic region for the 20 global health actors in 2019.

Network analysis is an analytic method that has proved to be useful in understanding relational dynamics across actors in global and public health.[17,18] Network analysis was conducted to observe the funding relationships between global health actors. Gephi 0.9.2 was used in constructing and analyzing the network map. The network modelled in the study allows for a graphical visualization of the flows of global health funding in 2019. The network map was designed such that each global health actor is represented by a node and lines or “edges” indicate a flow of funding in global health. The Fruchterman-Reingold algorithm was used in modelling the network map. The algorithm “calculates the optimal layout so that nodes with less strength and less connections are placed further apart, and those with more and/or stronger connections are placed closer to each other.”[19] The thickness of edges represents the amount of funding transferred between actors. The modelled network map can be found and will be discussed in the findings section.

### **Twitter data**



1  
2  
3 Using the Twitter API, we collected all the tweets of each global health actor by  
4 username from November 2016 to May 2020 in three month intervals. This means that  
5 all the tweets of each global health actor were collected for each day in the months of  
6 February, May, August, and November for each year. An interval of three months was  
7 decided for two reasons. First, a variation in the issues, topics, and themes that global  
8 health actors tweet can be observed in three month intervals. Initial small sample testing  
9 indicates that collecting all the tweets of every month for each actor yields redundancy  
10 in issues and topics observed. Redundancy is eliminated in three month intervals.  
11 Second, it also allows for efficient usage of the data request limits of the Twitter API. As  
12 Twitter limits the number of tweets one is able to collect from the Twitter API, this  
13 interval is an efficient way of collecting data for all 20 global health actors for the  
14 timeframe. A total of 74,241 tweets were collected from 2016 to 2020 for the 20 global  
15 health actors. Supplementary Tables 2 and 3 further describe the tweets collected.  
16  
17

18 Using Twitter as a data source plays an important role in analyzing GHG, examining  
19 whether it operates under the RAM, and characterizing power dynamics. In the  
20 academic area of communications studies, researchers suggest that there are two  
21 forms of utility that motivate actors to post content on Twitter. First, intrinsic utility  
22 assumes that a user receives inherent satisfaction from posting content on Twitter.[20]  
23 While global health actors do not necessarily receive the same “inherent satisfaction” as  
24 individual Twitter users, global health actors acquire more intrinsic utility as their  
25 communications reach a greater number of users. Second, image-related utility  
26 assumes that the perceptions of others,[21,22] and seeking status or prestige are strong  
27 motivators for posting content.[23,24] As global health actors operate best with high  
28 public approval, posting content on Twitter can improve public perception. Twitter is the  
29 ideal platform for global health actors to simultaneously share their work to a greater  
30 number of individuals and to improve their public perception. The utility received from  
31 using Twitter explains the social media’s ubiquity among global health actors.  
32  
33

34 Because Twitter limits each post to 280 characters, the platform promotes short,  
35 frequent, and straightforward manners of communication. The tweets of global health  
36 actors are regular ways of communicating their work, preferences, and priorities to the  
37 public.[25–28] The tweets of global health actors act as an archive, a record of historical  
38 preferences, priorities, goals, and implemented programs.[29]  
39  
40

41 While tweets can represent both stated and revealed priorities, for this study, we use  
42 tweets to represent revealed priorities. Since this study analyzes tweets in aggregation,  
43 our findings reveal the top themes discussed by each actor from 2016–2020. Because  
44 we do not analyze each tweet at an individual level, tweets are considered revealed  
45 priorities and not stated priorities.  
46  
47

### 48 **Obtaining revealed priorities from Twitter data**

49 NLP is a subfield in artificial intelligence, computer science, and linguistics at the  
50 intersection of the human language and computers. NLP is concerned about how to  
51 utilize computers to process and analyze large quantities of human language data. We  
52 use NLP in analyzing the tweets of the global health actors for two reasons. First, NLP  
53 allows for the efficient analysis of tens of thousands of rows of text data that could not  
54 be done manually.[30–32] Second, NLP allows for a technique called topic modeling  
55  
56  
57  
58  
59  
60



where an algorithm generates lists of words that are frequently used together.[33–35] These lists of words can then be interpreted to identify specific themes, topics, or issues to identify the top 10 priorities of each global health actor from 2016 to 2020. The results of the topic modeling are then used in a network analysis that visualizes where each actor converges or diverges in global health priorities with other actors.

As seen in Table 3, ten topics were generated using the Latent Dirichlet Allocation (LDA) topic model for each global health actor's tweets to reveal their priorities from 2016 to 2020. LDA is a generative probabilistic modeling method where words in a corpus of text that are frequently used together are categorized into topics.[36] This follows the assumption that documents, or in this case Twitter profiles, can be broken down into multiple topics that are identified by certain combinations of words.

**Table 3. Revealed Priorities from Twitter Topic Modeling.** Ten revealed priorities of each of the 20 global health actors based on their tweets from 2016 to 2020. Priorities are alphabetically arranged. Red indicates Funding Organizations. Blue indicates Channels of DAH. Gray indicates Implementing Institution.

| United States    | United Kingdom   | Gates Foundation | WHO           | World Bank       | UNAIDS         | UNFPA            | UNICEF         | UNITAID           | GAVI             |
|------------------|------------------|------------------|---------------|------------------|----------------|------------------|----------------|-------------------|------------------|
| Africa           | Africa           | Africa           | Africa        | Africa           | Access         | Africa           | Africa         | Access            | Africa           |
| Children         | Agriculture      | Breastfeeding    | Breastfeeding | Agriculture      | Africa         | Child Marriage   | Breastfeeding  | Cancer            | Cancer           |
| Education        | Children         | Children         | Children      | Children         | Discrimination | Children         | Children       | Children          | Children         |
| Food Security    | Development      | Education        | Ebola         | Climate Change   | HIV/AIDS       | Family Planning  | Climate Change | Hepatitis         | Cholera          |
| HIV/AIDS         | Ebola            | HIV/AIDS         | HIV/AIDS      | Food Security    | Human Rights   | FGM              | Ebola          | HIV/AIDS          | Ebola            |
| Humanitarian Aid | Education        | Malaria          | Malaria       | Humanitarian Aid | Innovation     | Human Rights     | Education      | Malaria           | Measles          |
| Mothers          | Food Security    | Mothers          | Measles       | Poverty          | Prevention     | Humanitarian Aid | Human Rights   | Testing           | Pneumonia        |
| South America    | HIV/AIDS         | Polio            | Mothers       | Sanitation       | Testing        | Nutrition        | Online         | Treatment         | Polio            |
| Water            | Humanitarian Aid | Sanitation       | Polio         | Water            | Treatment      | Violence         | Violence       | Tuberculosis      | Poverty          |
| Women            | Water            | Women            | Women         | Women            | Women          | Women            | Water          | Vaccines          | Vaccines         |
| Global Fund      | CDC              | EU CDC           | NIH           | FAO              | UNDP           | MSF              | PATH           | Save the Children | Oxfam            |
| Africa           | Children         | Ebola            | Africa        | Africa           | Africa         | Africa           | Access         | Africa            | Africa           |
| Children         | Diarrhea         | Hepatitis        | Cancer        | Agriculture      | Children       | Children         | Africa         | Children          | Climate Change   |
| Cholera          | E. Coli          | HIV/AIDS         | Funding       | Biodiversity     | Climate Change | Cholera          | Breastfeeding  | Donations         | Ebola            |
| Ebola            | Influenza        | Influenza        | Heart Disease | Climate Change   | Education      | Ebola            | Cancer         | Education         | Food Security    |
| HIV/AIDS         | Measles          | Measles          | HIV/AIDS      | Families         | FGM            | HIV/AIDS         | Children       | Food Security     | Humanitarian Aid |
| Malaria          | Prevention       | Outbreaks        | News          | Farmers          | Food Security  | Humanitarian Aid | Ebola          | Humanitarian Aid  | Malaria          |
| Pneumonia        | Vaccines         | Report           | Rare Disease  | Fisheries        | HIV/AIDS       | Refugees         | Innovation     | Pneumonia         | Pneumonia        |
| Polio            | Water            | Surveillance     | Research      | Food Security    | Malaria        | Treatment        | Malaria        | Refugees          | Refugees         |
| Tuberculosis     | Women            | Tuberculosis     | Stress        | Forests          | Water          | Tuberculosis     | Pneumonia      | Schools           | Water            |
| Women            | Zika             | West Nile        | Veterans      | Water            | Women          | Violence         | Vaccines       | Water             | Women            |

Additionally, we model a network map from the priorities generated using the LDA topic model also using the Fruchterman-Reingold algorithm. This network map visualizes the similarities in priorities between the 20 actors. Data used for this network map can be found in Supplementary Table 4. This network map is compared with the network map generated using financial data from IHME in the findings section. This comparison between network maps can illustrate if priorities from tweets and from financial data are aligned.

## Testing if GHG operates under the RAM

By combining evidence for stated and revealed priorities of 20 key global health actors, we can determine if GHG operates under the RAM.

The rational actor model (RAM) in international cooperation is categorized as the “linchpin of foreign policy decision making.”[37] This approach is rooted in expected utility theory in microeconomics introduced by von Neumann and Morgenstern in the 1940s and subsequent theories of rationality.[38]

RAM is most useful in explanations of economic behavior if the three conditions of the rationality assumption are fulfilled.[37] First, it is assumed that an actor’s goal is pre-determined before intentionally acting to achieve it.[37] Second, actors are assumed to “display consistent preferences as manifested in the ability to rank the preferences in transitive order.”[37] Third, actors are assumed to maximize utility while choosing an alternative that provides the highest amount of net personal benefit.[37]

“Rational” in this case does not simply mean a dispassionate calculation of costs and benefits. In the case of global health actors, acting rationally means weighing both economic and political factors, and acting according to the three assumptions of RAM.

GHG operates under RAM if each of the 20 global health actors and the global health system collectively fulfill the three assumptions of pre-determined goal, rank order preferences, and benefit maximization.

To test the first assumption of pre-determined goal, we determine the stated priorities of each global health actor from policy documents. We test whether there exist explicit statements on goals and priorities and note what health areas or issues are the stated priorities of each global health actor.

To test the second assumption of consistent rank order preferences, we compare revealed priorities from DAH funding data and revealed priorities from tweets. From the DAH funding data, we can determine rank order preferences based on which health issues are allocated the most funding in 2019. From tweets, we can determine rank order preferences based on the top 10 topics each global health actor tweeted about from 2016 to 2020. If there is consistency in rank order preferences between the revealed priorities from DAH funding data and revealed priorities from tweets, then the second assumption is fulfilled.

To test the third assumption of benefit maximization, we compare the stated and revealed priorities from all three data sources. The priorities that are consistent across stated priorities from policy documents and revealed priorities from DAH funding data and from tweets are revealed to be the priority that the global health actor determines to be benefit maximizing. An alignment of a preference across the three different sources can lead us to believe with high probability that it is the actor’s benefit maximizing preference.

We also test the three assumptions at the global health system level. Pre-determined goals are obtained from stated priorities from collective stated commitments to global health based on Sustainable Development Goal 3 (SDG-3) of “good health and well-being” as all 20 of the actors in this study have stated commitments to this goal. Consistent rank order preferences are derived from the alignment between aggregated

1  
2  
3 DAH funding allocations of all global health actors and the most common topics  
4 generated from tweets across all global health actors. The consistent preferences  
5 across stated and revealed priorities are inferred to be what the global health systems  
6 decides to be benefit maximizing.  
7

8 If each global health actor fulfills the three assumptions, and if the global health system  
9 collectively fulfills the three assumptions, then GHG operates under the RAM.  
10

### 11 **Characterizing power dynamics in GHG**

12 We use the following typology of power when characterizing power dynamics in GHG.  
13 “Power is exercised everywhere in global health although its presence may be more  
14 apparent in some instances than others,”[39] one global health researcher notes. The  
15 power concept in global health does not stray far from Robert Dahl’s (1957) definition in  
16 his seminal study where he describes “A has power over B to the extent that he can get  
17 B to do something B would not otherwise do.”[40] Specifically, one way to categorize  
18 power is through the four types introduced by Barnett and Duvall (2005), each  
19 manifesting in different manners in global health.[41] Supplementary Table 5  
20 summarizes Barnett and Duvall’s four types of power. First, compulsory power is  
21 defined as “direct control of one actor over the conditions of existence or the actions of  
22 another.”[41] In global health, compulsory power can be seen in how donor countries  
23 dictate the conditions in low and middle-income countries (LMICs) through development  
24 aid.[42] Second, institutional power is “the control actors exercise indirectly over others  
25 through diffuse relations of interactions.”[41] High-income countries control funding  
26 allocations for LMICs through institutional power via their contributions to the WHO and  
27 other multilateral organizations. Third, structural power refers to the “constitution of  
28 subjects’ capacities in direct structural relation to one another.”[41] The structural and  
29 historical disempowerment of indigenous populations have resulted in their  
30 disproportionate outcomes in health.[43,44] Fourth, “productive power works through  
31 diffuse constitutive relations to produce the situated social capacities of actors.”[40]  
32 Research institutions funded by high-income countries direct what health issues are  
33 studied and addressed.[45]  
34  
35  
36  
37  
38  
39

40 To characterize the power dynamics manifested in GHG, we analyze the interplay of  
41 stated and revealed priorities between funding organizations, channels of DAH, and  
42 implementing organizations. Particularly, we identify which global health actors have the  
43 most influence in setting global health priorities. The global health actors which have the  
44 most priorities aligned with the stated and revealed priorities of the global health system  
45 are determined to have the most influence and power in priority-setting.  
46  
47

## 48 **DISCUSSION**

### 49 **GHG operates under RAM**

50 As seen in Supplementary Table 1, we find that each of the 20 key global health actors  
51 fulfills the three assumptions of the RAM. Each actor has a pre-determined goal stated  
52 in mission statements, strategic plans, multi-year strategies, and other policy  
53 documents. Each actor has consistent rank order preferences as observed in the  
54  
55  
56  
57  
58  
59  
60

1  
2  
3 alignment of order of preferences in DAH funding data and top identified topics from  
4 tweets. Consistent, top-ranking preferences across policy documents, funding data, and  
5 tweets are the alternatives that maximize benefits for each global health actor based on  
6 their pre-determined goal.  
7

8 As an example, USAID's pre-determined goal is protecting national security through the  
9 providing aid the health areas of child and maternal health, HIV/AIDS, malaria, and  
10 tuberculosis as stated on their official website.[46] In 2019, 49% of aid from USAID  
11 support HIV/AIDS, 22% supported child and maternal health, and 7% to malaria.[47]  
12 The topic modelling for USAID's tweets shows that HIV/AIDS, child and maternal health,  
13 and malaria are the top themes tweeted about by the organization from 2016-2020 (See  
14 Supplementary Table 1). USAID behaves under the RAM since their revealed priorities  
15 from past funding behavior and from tweets align with their pre-determined goal.  
16  
17

18 As shown in the last row of Supplementary Table 1, we find that the global health  
19 system collectively fulfills the three assumptions of the RAM. The pre-determined goal  
20 of the global health system can be found in the WHO constitution and the 9 target areas  
21 for Sustainable Development Goal (SDG) 3 on good health and well-being. All 20 global  
22 health actors have stated commitments to the WHO mission and the SDGs. The  
23 alignment of DAH funding allocations and most common health issues from Twitter  
24 reveal that in terms of rank order, HIV/AIDS, child health, and maternal health are the  
25 top 3 priorities of the global health system collectively. To maximize benefits of the pre-  
26 determined goal of "health for all" and "SDG3: good health and well-being", the global  
27 health system prioritizes HIV/AIDS, child health, and maternal health. Among all 9  
28 stated targets in SDG3, only these three issues are prioritized. Effectively, the 6 other  
29 stated targets in SDG3 are deprioritized and underfunded by the global health system.  
30  
31

32 Since each global health actor and the global health system collectively fulfills the three  
33 assumptions, we find that GHG operates under the RAM. However, this does not imply  
34 cooperation of global health actors. This finding demonstrates the fact that each global  
35 health actor operates based on their rational self-interest and that the global health  
36 system operates based on the pursuit of only some of the stated priorities. Who  
37 determines which priorities are pursued by the global health system? The findings on  
38 power dynamics in GHG reveal the actors who determine global priorities.  
39  
40

### 41 **Compulsory and institutional power asymmetries in GHG**

42 As demonstrated in the following network maps, we find that there is compulsory and  
43 institutional power asymmetry in GHG.  
44

45 Compulsory power asymmetry can be found in how funding organizations strongly  
46 influence channels of DAH and implementing institutions based on their relationship.  
47 Channels of DAH and implementing institutions rely on funding organizations for  
48 resources to continue operating. We find that the top priorities of the 3 funding  
49 organizations in this study are also the priorities of channels of DAH and implementing  
50 institutions.  
51

52 As seen in Figure 1, HIV/AIDS is 1st priority of United States Agency for International  
53 Development (USAID), 2nd priority of United Kingdom Department for International  
54 Development (UK-DFID), and 2nd priority of the Bill and Melinda Gates Foundation  
55  
56  
57  
58  
59  
60

(BMGF) based on the alignment of stated and revealed priorities. HIV/AIDS is a priority of 4 of 8 channels of DAH and 4 of 9 implementing institutions based on its presence in policy documents, DAH funding, and tweets of each actor.

Figure 1 also demonstrates that maternal and child health is 2nd priority of USAID, 1st priority of UK-DFID, and 1st priority of BMGF based on the alignment stated and revealed priorities. Maternal and child health is a priority of 6 of 8 channels of DAH and 7 of 9 implementing institutions based on its presence in policy documents, DAH funding, and tweets of each actor.

Following the flow of the funding in Figure 2 and the similarities in tweets in Figure 1, we can see that institutional power asymmetry can be found in how funding organizations strongly influence implementing institutions through outsized influence of channels of DAH that allocate funding to these implementing institutions. As some implementing institutions do not get direct funding from funding organizations, but through channels of DAH, channels of DAH have direct control of funding of implementing institutions. Because wealthy funding organizations influence the priorities of channels of DAH, transitively, funders have power over implementing institutions. Implementing institutions in turn align their priorities with the priorities of channels of DAH, and transitively with the priorities of funding organizations.

Both network analyses of revealed priorities from DAH funding data and from tweets show how there is asymmetric levels of power held by the United States, United Kingdom, and the Gates Foundation in comparison to other actors. Figure 2 reveals how these three funding organizations are the largest funders for the work of the Global Fund, WHO, World Bank, US Foundations, UN organizations, and Gavi. The IHME DAH database reveals that 24% of all DAH funding was allocated to HIV/AIDS, 21% to child health, and 12% to maternal health – the three top priorities of funding organizations.[16] Only 14% was allocated to health system strengthening and 2% to non-communicable diseases.[16]

Figure 1 reveals how the most common topics generated across all global health actors include Africa, HIV/AIDS, child health, women health, and infectious diseases. These are the same health issues highly prioritized by the United States, United Kingdom, and Gates Foundation. Comparing figures 1 and 2, we find that these three funding organizations have outsized influence in priority-setting. Funding organizations have outsized influence because of how much DAH funding these three organizations have provided in comparison to other funding organizations. We find that the programs implemented and issues prioritized from 2016 to 2020 as documented through the tweets of the actor revolve around the main priorities of funding organizations of HIV/AIDS, child health, maternal health, infectious disease, and Africa. This outsized influence of global health funders limits the range of funded programs and policies that effectively reduce health inequities, especially making it difficult for smaller implementers to fund local programs and policies that do not neatly align with the priorities of major funders.

### **Limitations**

It is necessary to acknowledge the three limitations of this study. First, we assume stated priorities match what is specified in organizational documents. It may be the case



1  
2  
3 that some organizations communicate priorities differently from what is written in their  
4 foundational documents. Moreover, what is fundable may not necessarily be what is  
5 most important. Second, we assume that health funding is indeed spent on what it is  
6 ostensibly spent on when deriving revealed preferences from past health funding data,  
7 although may not be the case. Third, our scope is limited to examining 20 global health  
8 actors from 2016 to 2020. There is a multiplicity of non-health actors and processes that  
9 likely influence overall health outcomes of populations. Studying the stated and  
10 revealed priorities of non-health actors and processes such as foreign relations between  
11 nations and the influence of the private sector on health can improve the  
12 characterization of current GHG.  
13  
14

## 15 CONCLUSION

16  
17 We find empirical evidence at the global level showing that GHG operates under the  
18 RAM. Additionally, we find that at the global level, there is asymmetric compulsory and  
19 institutional power held by funding organizations, allowing global health priorities to be  
20 set by funders that have the money to spend on global health. In the past years, these  
21 funders have been the United States, United Kingdom, and the Gates Foundation. As  
22 shown by the triangulated evidence, the rational choice for all global health actors is to  
23 align their priorities with those of funding organizations in order to continue with their  
24 programs. These findings are in alignment with current literature discussing how  
25 “philantrocipitalists” and large funders having an outsized influence on global health  
26 agenda setting even without necessarily having an ethical framework for decision-  
27 making.[48,49]  
28  
29

30 Our paper complements the current research on agenda-setting in global health.  
31 Jeremy Shiffman’s (2016) discussion of how agenda-setting is not purely a rational  
32 deliberation of evidence but the convergence of problems, solutions, and political  
33 developments.[50] This study attempts to deepen the understanding of the  
34 manifestation and influence of power in agenda-setting through the lens of stated and  
35 revealed priorities.  
36

37 The priorities of funders of HIV/AIDS, child health, and maternal health have been  
38 prioritized from 2016-2020. While global health has seen improvements in these three  
39 areas, the existence of significant and severe preventable health inequalities  
40 demonstrates that this funding architecture does not necessarily promote equity and  
41 justice in global health. Additionally, other core health issues such as horizontal health  
42 system improvements do not appear to be prioritized that may have led to the  
43 persistence of global health inequity. We have empirical evidence supporting the  
44 arguments that current GHG operates under the RAM, and existing power asymmetries  
45 limit the range of choice for health policies and programs that aim to reduce inequities. If  
46 “health for all” and the SDG3 targets are to be achieved, then there must be a  
47 reassessment of current GHG under the RAM.  
48  
49  
50  
51

52 **Acknowledgements:** We thank participants in the Harvard Law School Global Justice  
53 Workshop for helpful comments on an earlier version of this work.  
54  
55  
56  
57  
58  
59  
60

1  
2  
3 **Author contributions:** G.F.B and J.P.R. made substantial contributions to the  
4 conception and design of the study, J.P.R supervised the research planning, analysis  
5 and execution and interpretation of data and analysis and G.F.B. conducted the  
6 analyses, G.F.B prepared the manuscript draft with J.P.R.'s critical input and revisions  
7 for important intellectual content, G.F.B. and J.P.R approved the final manuscript  
8 version to be published. J.P.R obtained funding, G.F.B and J.P.R agree to be  
9 accountable for all aspects of the work.  
10  
11

12 **Funding Statement:** This work was supported by the Health Equity and Policy Lab  
13 (HEPL) at the University of Pennsylvania. We acknowledge funding, in part, by the Vice  
14 Provost for Research University Research Foundation at the University of Pennsylvania.  
15  
16

17 **Competing interests:** No author has competing interests to declare.  
18

19 **Ethics approval:** The study did not have any human or animal participants.  
20 Additionally, the study did not require ethical approval as the Twitter data used were  
21 already in the public domain.  
22

23 **Data and materials availability:** Under the "Content Redistribution" section of Twitter's  
24 Developer Agreement and Policy, "We restrict the redistribution of Twitter Content to  
25 third parties. If you provide Twitter Content to third parties, including downloadable  
26 datasets or via an API, you may only distribute Tweet IDs, Direct Message IDs, and/or  
27 User IDs." Because the data collected using the Twitter API does not allow for  
28 redistribution under the Twitter Developer Agreement and Policy, tweets cannot be  
29 made publicly available. Only Tweet ID's and User ID's are allowed to be redistributed  
30 according to the Twitter policy. Please email [jenpr@upenn.edu](mailto:jenpr@upenn.edu) if you wish to receive a  
31 copy of the Tweet ID's and User ID's of the data and/or the code used in the study. The  
32 IHME DAH Database can be found at [http://ghdx.healthdata.org/record/ihme-](http://ghdx.healthdata.org/record/ihme-data/development-assistance-health-database-1990-2019)  
33 [data/development-assistance-health-database-1990-2019](http://ghdx.healthdata.org/record/ihme-data/development-assistance-health-database-1990-2019)  
34  
35  
36

## 37 **FIGURE LEGENDS**

38  
39 **Figure 1. Network Analysis of Revealed Priorities from Tweets.** Line thickness  
40 represents how many similar priorities one global health actor has with another. Font  
41 size of global health priorities represent the number of organizations have it as a  
42 priority. Data used found in Supplementary Table 4.  
43  
44

45 **Figure 2. Network Analysis of Revealed Priorities from Funding for DAH (2019).**  
46 Line thickness represents the amount of funding for health that was transferred between  
47 two actors. Font size represents the total amount of funding for health donated or  
48 received in 2019.  
49  
50  
51  
52  
53  
54  
55  
56  
57  
58  
59  
60



## REFERENCES

- 1 Ng NY, Ruger JP. Global Health Governance at a Crossroads. *Global health governance : the scholarly journal for the new health security paradigm* 2011;**3**.
- 2 Giaimo S. Interest Groups, Think Tanks, and Health Care Policy (1960s-Present). In: *Guide to U.S. Health and Health Care Policy*. Thousand Oaks CA: : SAGE Publications 2014. 375–92.
- 3 Spicer N, Agyepong I, Ottersen T, *et al*. ‘It’s far too complicated’: why fragmentation persists in global health. *Globalization and Health* 2020;**16**. doi:10.1186/s12992-020-00592-1
- 4 Szlezák NA, Bloom BR, Jamison DT, *et al*. The Global Health System: Actors, Norms, and Expectations in Transition. *PLoS Medicine* 2010;**7**. doi:10.1371/journal.pmed.1000183
- 5 United Kingdom House of Lords. Chapter 3: International health: the institutional labyrinth. Select Committee on Intergovernmental Organisations First Report. 2008.
- 6 Ottersen OP, Dasgupta J, Blouin C, *et al*. The political origins of health inequity: Prospects for change. *The Lancet*. 2014;**383**. doi:10.1016/S0140-6736(13)62407-1
- 7 Walt G. Global cooperation in international public health. In: Merson M, Black R, Mills A, eds. *International Public Health*. Gaithersburg, Maryland: : Aspen Publishers 2001.
- 8 Mayhew SH, Walt G, Lush L, *et al*. Donor Agencies’ Involvement in Reproductive Health: Saying One Thing and Doing Another? *International Journal of Health Services* 2005;**35**. doi:10.2190/K46B-RRXJ-95M4-JDQU
- 9 Burris S. Governance, Microgovernance and Health. *Temple Law Review* 2004;**77**:335–62.
- 10 Brooks A, Cutts FT, Walt G. Policy study of factors influencing the adoption of new and underutilized vaccines in developing countries. Washington D.C.: 1999.
- 11 Travis P, Bennett S, Haines A, *et al*. Overcoming health-systems constraints to achieve the Millennium Development Goals. *The Lancet* 2004;**364**. doi:10.1016/S0140-6736(04)16987-0
- 12 Hoffman SJ, Røttingen J-A. Dark sides of the proposed Framework Convention on Global Health’s many virtues: A systematic review and critical analysis. *Health and Human Rights* 2013;**15**:117–34.
- 13 Ruger JP. Global health governance as shared health governance. *Journal of Epidemiology and Community Health* 2012;**66**. doi:10.1136/jech.2009.101097
- 14 Frenk J, Moon S. Governance Challenges in Global Health. *New England Journal of Medicine* 2013;**368**. doi:10.1056/NEJMra1109339
- 15 Hoffman SJ, Cole CB. Defining the global health system and systematically mapping its network of actors. *Globalization and Health* 2018;**14**. doi:10.1186/s12992-018-0340-2
- 16 Institute for Health Metrics and Evaluation (IHME). Development Assistance for Health Database 1990-2019. *Institute for Health Metrics and Evaluation (IHME)* 2020.

- 1  
2  
3 17 Lopreite M, Puliga M, Riccaboni M, *et al.* A social network analysis of the organizations focusing on  
4 tuberculosis, malaria and pneumonia. *Social Science and Medicine* 2021;**278**.  
5 doi:10.1016/j.socscimed.2021.113940  
6
- 7 18 Quissell K, Berlan D, Shiffman J, *et al.* Explaining global network emergence and nonemergence:  
8 Comparing the processes of network formation for tuberculosis and pneumonia. *Public Administration*  
9 *and Development* 2018;**38**. doi:10.1002/pad.1836  
10
- 11 19 Hevey D. Network analysis: A brief overview and tutorial. *Health Psychology and Behavioral Medicine*  
12 2018;**6**. doi:10.1080/21642850.2018.1521283  
13
- 14 20 Ryan RM, Deci EL. Self-determination theory and the facilitation of intrinsic motivation, social  
15 development, and well-being. *American Psychologist* 2000;**55**. doi:10.1037/0003-066X.55.1.68  
16
- 17 21 Donelle L, Booth R. Health Tweets: An Exploration of Health Promotion on Twitter. *American Nurses*  
18 *Association* 2012;**17**.  
19
- 20 22 Park H, Rodgers S, Stemmler J. Analyzing Health Organizations' Use of Twitter for Promoting Health  
21 Literacy. *Journal of Health Communication* 2013;**18**. doi:10.1080/10810730.2012.727956  
22
- 23 23 Glazer A, Konrad K. A Signaling Explanation for Charity. *American Economic Review* 1996;**86**:1019–28.  
24
- 25 24 Harbaugh W. The Prestige Motive for Making Charitable Transfers. *American Economic Review*  
26 1998;**88**:227–82.  
27
- 28 25 Fung IC-H, Jackson AM, Ahweyevu JO, *et al.* #Globalhealth Twitter Conversations on #Malaria, #HIV, #TB,  
29 #NCDS, and #NTDS: a Cross-Sectional Analysis. *Annals of Global Health* 2017;**83**.  
30 doi:10.1016/j.aogh.2017.09.006  
31
- 32 26 Goff DA, Kullar R, Laxminarayan R, *et al.* Twitter to engage, educate, and advocate for global antibiotic  
33 stewardship and antimicrobial resistance. *The Lancet Infectious Diseases* 2019;**19**. doi:10.1016/S1473-  
34 3099(19)30058-1  
35
- 36 27 Guidry JPD, Jin Y, Orr CA, *et al.* Ebola on Instagram and Twitter: How health organizations address the  
37 health crisis in their social media engagement. *Public Relations Review* 2017;**43**.  
38 doi:10.1016/j.pubrev.2017.04.009  
39
- 40 28 Scanfeld D, Scanfeld V, Larson EL. Dissemination of health information through social networks: Twitter  
41 and antibiotics. *American Journal of Infection Control* 2010;**38**. doi:10.1016/j.ajic.2009.11.004  
42
- 43 29 Zamora A. Making Room For Big Data: Web Scraping and an Affirmative Right to Access Publicly  
44 Available Information Online. *Journal of Business, Entrepreneurship & the Law* 2019;**12**:203–28.  
45
- 46 30 Alvarez-Melis D, Saveski M. Topic Modeling in Twitter: Aggregating Tweets by Conversations. *Tenth*  
47 *International AAAI Conference on Web and Social Media* 2016.  
48
- 49 31 Hong L, Davison BD. Empirical study of topic modeling in Twitter. In: *Proceedings of the First Workshop*  
50 *on Social Media Analytics - SOMA '10*. New York, New York, USA: : ACM Press 2010.  
51 doi:10.1145/1964858.1964870  
52  
53  
54  
55  
56  
57  
58  
59  
60

- 1  
2  
3 32 Yang S-H, Kolcz A, Schlaikjer A, *et al.* Large-scale high-precision topic modeling on twitter. In:  
4 *Proceedings of the 20th ACM SIGKDD international conference on Knowledge discovery and data mining*  
5 *- KDD '14.* New York, New York, USA: : ACM Press 2014. doi:10.1145/2623330.2623336  
6
- 7 33 Bakshi RK, Kaur N, Kaur R, *et al.* Opinion mining and sentiment analysis. *2016 3rd International*  
8 *Conference on Computing for Sustainable Global Development (INDIACom)* 2016;:452–5.  
9
- 10 34 Pak A, Paroubek P. Twitter as a Corpus for Sentiment Analysis and Opinion Mining. *LREc* 2010;**10**:1320–  
11 6.  
12
- 13 35 Saif H, He Y, Alani H. Semantic Sentiment Analysis of Twitter. 2012. doi:10.1007/978-3-642-35176-1\_32  
14
- 15 36 Blei DM, Ng AY, Jordan MI. Latent Dirichlet allocation. *Journal of Machine Learning Research* 2003;**3**.  
16 doi:10.1016/b978-0-12-411519-4.00006-9  
17
- 18 37 Mintz A, DeRouen K. The Rational Actor Model. In: *Understanding Foreign Policy Decision Making*.  
19 Cambridge: : Cambridge University Press 2010. 57–68.  
20
- 21 38 MacDonald PK. Useful Fiction or Miracle Maker: The Competing Epistemological Foundations of Rational  
22 Choice Theory. *American Political Science Review* 2003;**97**. doi:10.1017/S000305540300087X  
23
- 24 39 Shiffman J. Knowledge, moral claims and the exercise of power in global health. *International Journal of*  
25 *Health Policy and Management* 2014;**3**. doi:10.15171/ijhpm.2014.120  
26
- 27 40 Dahl RA. The concept of power. *Behavioral Science* 2007;**2**. doi:10.1002/bs.3830020303  
28
- 29 41 Barnett M, Duvall R. Power in International Politics. *International Organization* 2005;**59**.  
30 doi:10.1017/S0020818305050010  
31
- 32 42 Shawar YR, Ruger JP. The Politics of Global Health Inequalities: Approaches to Studying the Role of  
33 Power. In: McInnes C, Lee K, Youde J, eds. *The Oxford Handbook of Global Health Politics*. Oxford: 2020.  
34 59–76.  
35
- 36 43 Holmes SM. Structural Vulnerability and Hierarchies of Ethnicity and Citizenship on the Farm. *Medical*  
37 *Anthropology* 2011;**30**. doi:10.1080/01459740.2011.576728  
38
- 39 44 Goldade K. “Health Is Hard Here” or “Health for All”? *Medical Anthropology Quarterly* 2009;**23**.  
40 doi:10.1111/j.1548-1387.2009.01074.x  
41
- 42 45 Sridhar D. Who Sets the Global Health Research Agenda? The Challenge of Multi-Bi Financing. *PLoS*  
43 *Medicine* 2012;**9**. doi:10.1371/journal.pmed.1001312  
44
- 45 46 Usaid.gov. 2021. Global Health. [online] Available at: <<https://www.usaid.gov/global-health>> [Accessed  
46 1 November 2021].  
47
- 48 47 Usaid.gov. 2021. Health Areas. [online] Available at: <[https://www.usaid.gov/global-health/health-](https://www.usaid.gov/global-health/health-areas)  
49 *areas*> [Accessed 1 November 2021].  
50
- 51 48 Birn A-E. Philanthrocapitalism Past and Present: The Rockefeller Foundation, the Gates Foundation and  
52 the Setting(s) of the International/Global Health Agenda. *Hypothesis* 2014;**12**.  
53
- 54 49 McGoey L. Philanthrocapitalism and its critics. *Poetics* 2012;**40**. doi:10.1016/j.poetic.2012.02.006  
55  
56  
57  
58  
59  
60

1  
2  
3  
4  
5  
6  
7  
8  
9  
10  
11  
12  
13  
14  
15  
16  
17  
18  
19  
20  
21  
22  
23  
24  
25  
26  
27  
28  
29  
30  
31  
32  
33  
34  
35  
36  
37  
38  
39  
40  
41  
42  
43  
44  
45  
46  
47  
48  
49  
50  
51  
52  
53  
54  
55  
56  
57  
58  
59  
60

50 Shiffman J. Agenda Setting in Public Health Policy. In: *International Encyclopedia of Public Health*. 2016. doi:10.1016/B978-0-12-803678-5.00007-2

For peer review only

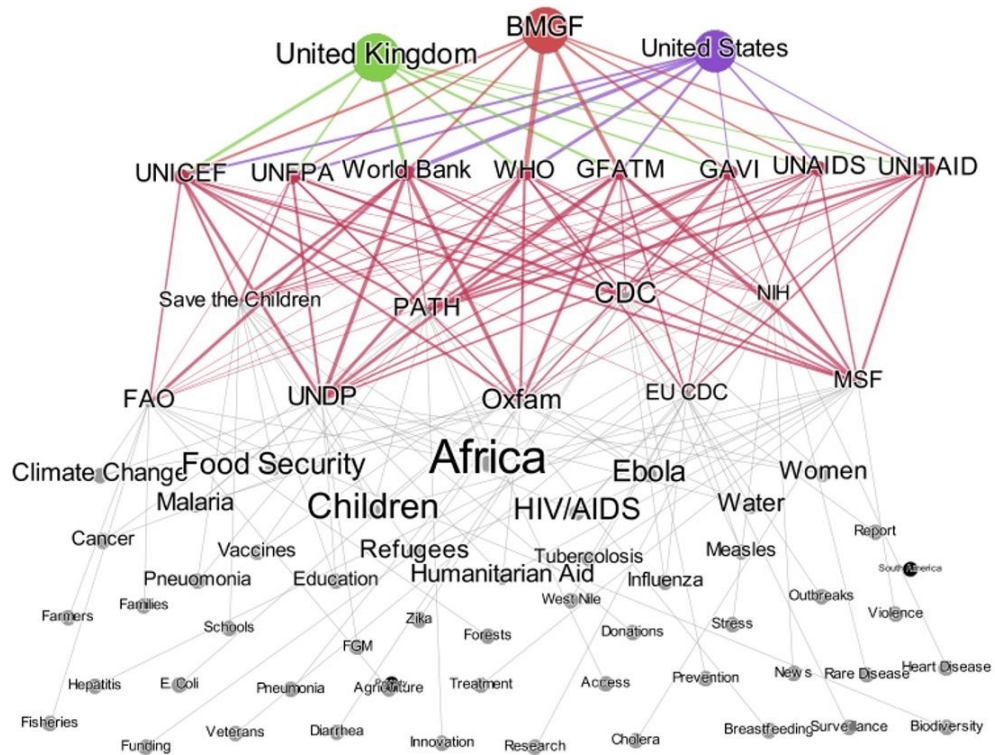

Figure 1. Network Analysis of Revealed Priorities from Tweets. Line thickness represents how many similar priorities one global health actor has with another. Font size of global health priorities represent the number of organizations have it as a priority. Data used found in Supplementary Table 4.

167x128mm (168 x 168 DPI)

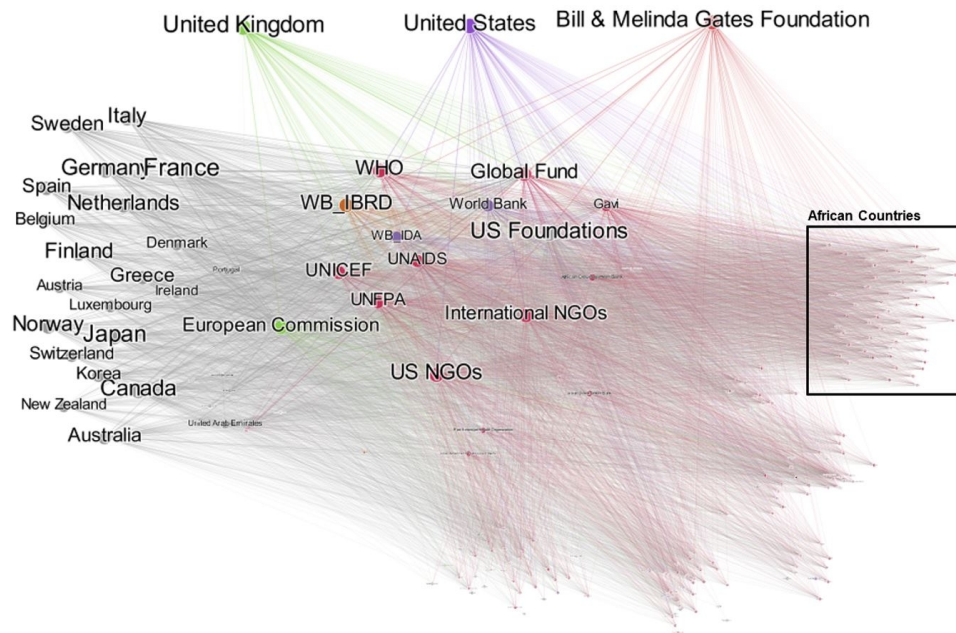

Figure 2. Network Analysis of Revealed Priorities from Funding for DAH (2019). Line thickness represents the amount of funding for health that was transferred between two actors. Font size represents the total amount of funding for health donated or received in 2019.

211x138mm (168 x 168 DPI)



Supplemental Material

**Supplementary Table 1. Evidence and Testing RAM by Actor.** Evidence for stated and revealed priorities and testing of RAM for each actor and the global health system as a whole. Light red indicates funding organization, blue indicates channel of DAH, yellow indicates implementing institution, and dark red indicates global health system as a whole.

|         | Evidence                                                                                                                                                                                                                                                                                                                                                                                                                                                                                                                                                                                                                                                                                                                                                                                                                                                                                                                                                                                                                                                                                                                                                                                             |                                                                                                                                                                                                                                                                                                                                                                                                                                                                                                                                                                                                                                                                                                                                                                                                                                                                                                                                                                                                                                        |                                                                                                                                                                                                                        | Testing Assumptions of RAM                                                                                                                                                                                     |                                                                                                   |                                                                                                                                                                                                                                       | Operates under RAM? |
|---------|------------------------------------------------------------------------------------------------------------------------------------------------------------------------------------------------------------------------------------------------------------------------------------------------------------------------------------------------------------------------------------------------------------------------------------------------------------------------------------------------------------------------------------------------------------------------------------------------------------------------------------------------------------------------------------------------------------------------------------------------------------------------------------------------------------------------------------------------------------------------------------------------------------------------------------------------------------------------------------------------------------------------------------------------------------------------------------------------------------------------------------------------------------------------------------------------------|----------------------------------------------------------------------------------------------------------------------------------------------------------------------------------------------------------------------------------------------------------------------------------------------------------------------------------------------------------------------------------------------------------------------------------------------------------------------------------------------------------------------------------------------------------------------------------------------------------------------------------------------------------------------------------------------------------------------------------------------------------------------------------------------------------------------------------------------------------------------------------------------------------------------------------------------------------------------------------------------------------------------------------------|------------------------------------------------------------------------------------------------------------------------------------------------------------------------------------------------------------------------|----------------------------------------------------------------------------------------------------------------------------------------------------------------------------------------------------------------|---------------------------------------------------------------------------------------------------|---------------------------------------------------------------------------------------------------------------------------------------------------------------------------------------------------------------------------------------|---------------------|
|         | Stated Priorities from Policy Documents                                                                                                                                                                                                                                                                                                                                                                                                                                                                                                                                                                                                                                                                                                                                                                                                                                                                                                                                                                                                                                                                                                                                                              | Revealed Priorities from DAH Data                                                                                                                                                                                                                                                                                                                                                                                                                                                                                                                                                                                                                                                                                                                                                                                                                                                                                                                                                                                                      | Revealed Priorities from Tweets                                                                                                                                                                                        | Pre-determined goal?                                                                                                                                                                                           | Consistent preferences?                                                                           | Utility maximizing?                                                                                                                                                                                                                   |                     |
| USAID   | <p>“On behalf of the American people, we promote and demonstrate democratic values abroad, and advance a free, peaceful, and prosperous world. <b>In support of America’s foreign policy</b>, the U.S. Agency for International Development leads the U.S. Government’s international development and disaster assistance through partnerships and investments that save lives, reduce poverty, strengthen democratic governance, and help people emerge from humanitarian crises and progress beyond assistance.” (<a href="#">2019 USAID Financial Report</a>)</p> <p>“For over 50 years, USAID’s global health programs have saved lives, protected people most vulnerable to disease, and promoted the stability of communities and nations, while advancing American security and prosperity. <b>America is safer and stronger when people can live healthy and productive lives and when nations around the world are self-reliant and resilient.</b>” (<a href="#">USAID Website</a>)</p> <p><b>Health Focus Area</b> (<a href="#">USAID Website</a>)</p> <ul style="list-style-type: none"> <li>Child and maternal death</li> <li>HIV/AIDS</li> <li>Malaria</li> <li>Tuberculosis</li> </ul> | <p><b>Health Focus Area</b><br/>49.0% of 2019 US DAH (\$6.0 billion) supported <b>HIV/AIDS</b>; 7.0% (\$862.5 million) supported <b>malaria</b>; 11.4% (\$1.4 billion) was disbursed for <b>child health</b>, and 10.8% (\$1.3 billion) went to <b>maternal health</b>.</p> <p><b>Region</b><br/>In 2017, the most recent year for which regional DAH estimates are available, the US directed much of its resources to <b>sub-Saharan Africa</b>, sending 50.5%, or \$6.9 billion, of 2017 DAH.</p> <p><b>Channel</b><br/>The US provided 59.2% of its funding in 2019 through its own bilateral agencies, including the United States Agency for International Development (<b>USAID</b>), the President’s Malaria Initiative (<b>PMI</b>), and <b>PEPFAR</b>. <b>UN agencies</b> received 6.2% of US DAH in 2019, or \$761.4 million. <b>Gavi</b> received \$307.0 million, up 9.0% from 2018, and the <b>Global Fund</b> received \$636.5 million, down 25.8%. <b>NGOs</b> received 26.8% of US DAH in 2019, or \$3.3 billion.</p> | <p><b>Topics from 2016-2020 tweets</b> (<a href="#">no order</a>)</p> <p>Africa<br/>Children<br/>Education<br/>Food Security<br/>HIV/AIDS<br/>Humanitarian Aid<br/>Mothers<br/>South America<br/>Water<br/>Women</p>   | <p>National security<br/>National interests</p> <p>Global health focus:<br/>Child and maternal health, HIV/AIDS, malaria, tuberculosis</p>                                                                     | <p>HIV/AIDS, child and maternal health, and Africa are consistent across DAH data and tweets</p>  | <p>HIV/AIDS, child and maternal health are consistent across stated and revealed priorities.</p> <p>To maximize benefits for national security and interests, USAID prioritizes HIV/AIDS and child and maternal health in Africa.</p> | Yes                 |
| UK DFID | <p><b>“We pursue our national interests and project the UK as a force for good in the world.</b> We promote the interests of British citizens, safeguard the UK’s security, defend our values, reduce poverty and tackle global challenges with our international partners.” (<a href="#">UK FCDO, formerly DFID website</a>)</p> <p>“We are responsible for:</p> <ol style="list-style-type: none"> <li>honouring the UK’s international commitments and taking</li> </ol>                                                                                                                                                                                                                                                                                                                                                                                                                                                                                                                                                                                                                                                                                                                          | <p><b>Health Focus Area</b><br/><b>Reproductive, maternal, newborn, and child health</b> was the focus of \$1.4 billion (38.5%) of the UK’s DAH in 2019, followed by <b>HIV/AIDS</b> with \$553.9 million (15.8%).</p> <p><b>Region</b><br/>By GBD super-regions, the UK contributed \$1.3 billion, or 37.3% of its 2017 DAH, to <b>sub-</b></p>                                                                                                                                                                                                                                                                                                                                                                                                                                                                                                                                                                                                                                                                                       | <p><b>Topics from 2016-2020 tweets</b> (<a href="#">no order</a>)</p> <p>Africa<br/>Agriculture<br/>Children<br/>Development<br/>Ebola<br/>Education<br/>Food Security<br/>HIV/AIDS<br/>Humanitarian Aid<br/>Water</p> | <p>National interests<br/>National security</p> <p>Global peace, security, and governance; Crisis response and resilience; Global prosperity; Extreme poverty and helping most vulnerable; Value for money</p> | <p>Child and maternal health, HIV/AIDS, and Africa are consistent across DAH data and tweets.</p> | <p>Child and maternal health, HIV/AIDS, and Africa are consistent across stated and revealed priorities.</p> <p>To maximize benefits for national security and interests, UK DFID prioritizes child and maternal</p>                  | Yes                 |



|      |                                                                                                                                                                                                                                                                                                                                                                                                                                                                                                                                                                                                                                                                                                                                                                                                                                                                                                                                                                                                                                                                                                                                      |                                                                                                                                                                                                                                                                                                                                                                                                                                                                                                                                                      |                                                                                                                                                                                                     |                                                                                                                                                                                                           |                                                                                                                                                          |                                                                                                                       |     |
|------|--------------------------------------------------------------------------------------------------------------------------------------------------------------------------------------------------------------------------------------------------------------------------------------------------------------------------------------------------------------------------------------------------------------------------------------------------------------------------------------------------------------------------------------------------------------------------------------------------------------------------------------------------------------------------------------------------------------------------------------------------------------------------------------------------------------------------------------------------------------------------------------------------------------------------------------------------------------------------------------------------------------------------------------------------------------------------------------------------------------------------------------|------------------------------------------------------------------------------------------------------------------------------------------------------------------------------------------------------------------------------------------------------------------------------------------------------------------------------------------------------------------------------------------------------------------------------------------------------------------------------------------------------------------------------------------------------|-----------------------------------------------------------------------------------------------------------------------------------------------------------------------------------------------------|-----------------------------------------------------------------------------------------------------------------------------------------------------------------------------------------------------------|----------------------------------------------------------------------------------------------------------------------------------------------------------|-----------------------------------------------------------------------------------------------------------------------|-----|
|      | <p>action to achieve the <b>United Nations' Global Goals</b> making British aid more effective by improving transparency, openness and value for money</p> <p>2. targeting British international development policy on economic growth and wealth creation</p> <p>3. improving the coherence and performance of British international development policy in <b>fragile and conflict-affected countries</b></p> <p>4. improving the lives of <b>girls and women</b> through better education and a greater choice on <b>family planning</b> preventing <b>violence against girls and women</b> in the developing world</p> <p>5. helping to prevent climate change and encouraging adaptation and low-carbon growth in developing countries</p> <p>Priorities</p> <ul style="list-style-type: none"> <li>strengthening global peace, security and governance</li> <li><b>strengthening resilience and response to crisis</b></li> <li>promoting global prosperity</li> <li>tackling extreme poverty and <b>helping the world's most vulnerable</b> delivering value for money"</li> </ul> <p><a href="#">(UK DFID About Page)</a></p> | <p><b>Saharan Africa;</b> \$301.0 million (8.7%) to South Asia; \$163.9 million (4.7%) to Southeast Asia, East Asia, and Oceania; \$237.9 million (6.9%) to North Africa and the Middle East; and \$41.0 million (1.2%) to Central Europe, Eastern Europe, and Central Asia.</p> <p><u>Channel</u><br/>Of the UK's 2019 DAH, \$990.3 million (28.2%) was channeled to <b>UK bilateral agencies;</b> \$524.6 million (14.9%) to <b>UN agencies;</b> \$306.4 million (8.7%) to <b>Gavi;</b> and \$817.1 million (23.3%) to the <b>Global Fund.</b></p> |                                                                                                                                                                                                     |                                                                                                                                                                                                           | health and HIV/AIDS in Africa.                                                                                                                           |                                                                                                                       |     |
| BMGF | <p><b>"Strategic Investments.</b> We partner with entrepreneurs, companies, and other organizations to create incentives that <b>harness the power of private enterprise to create change for those who need it most.</b>" (<a href="#">BMGF: how we work</a>)</p> <p><b>Global development.</b> "Our Global Development Division focuses on improving the delivery of <b>high-impact health</b></p>                                                                                                                                                                                                                                                                                                                                                                                                                                                                                                                                                                                                                                                                                                                                 | <p><u>Health Focus Area</u><br/>In 2019, the Gates Foundation directed \$1.5 billion, or 38.3%, of its DAH to <b>reproductive, maternal, newborn, and child health;</b> \$709.3 million, or 18.1%, to <b>HIV/AIDS;</b> \$303.9 million, or 7.8% to <b>malaria;</b> \$237.6 million, or 6.1%, to</p>                                                                                                                                                                                                                                                  | <p><u>Topics from 2016-2020 tweets</u><br/><u>(no order)</u></p> <p>Africa<br/>Breastfeeding<br/>Children<br/>Education<br/>HIV/AIDS<br/>Malaria<br/>Mothers<br/>Polio<br/>Sanitation<br/>Women</p> | <p>Strategic investments -- private enterprise solutions for most disadvantaged;</p> <p>High-impact health products and services to world's poorest</p> <p>Stated global development areas: Emergency</p> | <p>Child and maternal health, HIV/AIDS, malaria, and Africa are consistent across DAH data and tweets.</p> <p>To maximize returns of their strategic</p> | <p>Child and maternal health, HIV/AIDS, malaria, and Africa are consistent across stated and revealed priorities.</p> | Yes |

|            |                                                                                                                                                                                                                                                                                                                                                                                                                                                                                                                                                                                                                                                                                                                                                                                                                                                                                                                                                                                                                                                                                                                                                                                                                                                                                                                                                                                                |                                                                                                                                                                                                                                                                                                                                                                                                                                                                                                                                                                                                                                                                                                                                                                                                      |                                                                                                                                                                                                                                                                                                                                            |                                                                                                                                                                                                                                                                                                                                                                                                                                                                                                               |                                                                                                                  |                                                                                                                                                                                                                                                                                                |            |
|------------|------------------------------------------------------------------------------------------------------------------------------------------------------------------------------------------------------------------------------------------------------------------------------------------------------------------------------------------------------------------------------------------------------------------------------------------------------------------------------------------------------------------------------------------------------------------------------------------------------------------------------------------------------------------------------------------------------------------------------------------------------------------------------------------------------------------------------------------------------------------------------------------------------------------------------------------------------------------------------------------------------------------------------------------------------------------------------------------------------------------------------------------------------------------------------------------------------------------------------------------------------------------------------------------------------------------------------------------------------------------------------------------------|------------------------------------------------------------------------------------------------------------------------------------------------------------------------------------------------------------------------------------------------------------------------------------------------------------------------------------------------------------------------------------------------------------------------------------------------------------------------------------------------------------------------------------------------------------------------------------------------------------------------------------------------------------------------------------------------------------------------------------------------------------------------------------------------------|--------------------------------------------------------------------------------------------------------------------------------------------------------------------------------------------------------------------------------------------------------------------------------------------------------------------------------------------|---------------------------------------------------------------------------------------------------------------------------------------------------------------------------------------------------------------------------------------------------------------------------------------------------------------------------------------------------------------------------------------------------------------------------------------------------------------------------------------------------------------|------------------------------------------------------------------------------------------------------------------|------------------------------------------------------------------------------------------------------------------------------------------------------------------------------------------------------------------------------------------------------------------------------------------------|------------|
|            | <p><b>products and services</b> to the world's poorest communities and helps countries expand access to health coverage.<br/> <b>Areas:</b> Emergency Response, Family Planning, Global Delivery Programs, Global Libraries, Maternal, Newborn &amp; Child Health, Nutrition, Polio" (<a href="#">BMGF: our work</a>)</p> <p><b>Global health.</b> "Our Global Health Division aims to <b>reduce inequities in health</b> by developing new tools and strategies to reduce the <b>burden of infectious disease</b> and the <b>leading causes of child mortality</b> in developing countries.</p> <p><b>Areas:</b> Discovery &amp; Translational Sciences, Enteric and Diarrheal Diseases, HIV, Innovative Technology Solutions, Institute for Disease Modeling, Integrated Development, Malaria, Maternal, Newborn &amp; Child Health, Discovery &amp; Tools, Neglected Tropical Diseases, Pneumonia Tuberculosis, Vaccine Development and Surveillance" (<a href="#">BMGF: our work</a>)</p>                                                                                                                                                                                                                                                                                                                                                                                                  | <p><b>tuberculosis;</b> \$266.5 million, or 6.8%, to <b>health systems strengthening;</b> and \$72.4 million, or 1.9%, to <b>non-communicable diseases.</b></p> <p><u>Region</u><br/>                 In 2017, the Foundation provided 41% of its DAH to <b>global recipients</b> and programs and 18% to <b>sub-Saharan Africa.</b></p> <p><u>Channel</u><br/>                 The Gates Foundation's 2019 DAH total of \$3.9 billion was an increase of 9.9% from 2018. Of this, \$2.5 billion or 64.0% was channeled through the Gates Foundation <b>directly to implementing institutions.</b> In 2019, \$266.8 million (7%) in Gates Foundation DAH went to <b>UN agencies,</b> \$256.9 million (7%) went to the <b>Global Fund,</b> and \$406.1 million (10%) was directed to <b>Gavi.</b></p> |                                                                                                                                                                                                                                                                                                                                            | <p>Response, Family Planning, Global Delivery Programs, Global Libraries, Maternal, Newborn &amp; Child Health, Nutrition, Polio</p> <p>Stated global health areas: Discovery &amp; Translational Sciences, Enteric and Diarrheal Diseases, HIV, Innovative Technology Solutions, Institute for Disease Modeling, Integrated Development, Malaria, Maternal, Newborn &amp; Child Health, Discovery &amp; Tools, Neglected Tropical Diseases, Pneumonia Tuberculosis, Vaccine Development and Surveillance</p> |                                                                                                                  | <p>investments, BMGF prioritizes child and maternal health, HIV/AIDS, and malaria in Africa.</p>                                                                                                                                                                                               |            |
| <p>WHO</p> | <p><b>"Health for all.</b> Ensuring universal health coverage without impoverishment is the foundation for achieving the health objectives of the Sustainable Development Goals – because when people are healthy, their families, communities and countries benefit. Our top priority must be to support national health authorities' efforts to strengthen all the building blocks of health systems and to enact policies aimed at ensuring health care is equitable and affordable for all.</p> <p><b>Health emergencies.</b> In today's interconnected world, public health emergencies can affect anyone, anywhere – and the Ebola crisis in West Africa showed us the dangers of being unprepared. The development of resilient and robust global and local health systems capable of preventing, monitoring, detecting and responding to public health emergencies must therefore be a key priority, closely linked to our efforts to achieve universal health coverage.</p> <p><b>Women, children and adolescents.</b> We cannot achieve the ambitious health and development targets in the Sustainable Development Goals unless we secure the health, dignity and rights of women, children and adolescents. Yet, in too many places, gender gaps, harmful cultural and social practices and gender-based violence are negatively impacting these individuals. Because of that,</p> | <p><u>Health Focus Area</u><br/>                 WHO provided \$2.5 billion of DAH in 2019, down 1.2% from 2018. Of this, \$630.7 million or 24.9% was disbursed to other <b>infectious diseases</b> and \$1.0 billion or 39.8% to <b>health systems strengthening.</b></p> <p><u>Region</u><br/>                 DAH data for the WHO in 2019 have unallocated or unspecified regions.</p>                                                                                                                                                                                                                                                                                                                                                                                                          | <p><u>Topics from 2016-2020 tweets (no order)</u></p> <p>Africa<br/>                 Breastfeeding<br/>                 Children<br/>                 Ebola<br/>                 HIV/AIDS<br/>                 Malaria<br/>                 Measles<br/>                 Mothers<br/>                 Polio<br/>                 Women</p> | <p>Universal health coverage, health systems strengthening, health equity, health emergencies, infectious diseases, maternal and child health, gender equity, climate and environmental impacts on health, improved WHO governance</p>                                                                                                                                                                                                                                                                        | <p>Infectious diseases (ebola, HIV/AIDS, malaria, measles, polio) are consistent across DAH data and tweets.</p> | <p>Infectious diseases (ebola, HIV/AIDS, malaria, measles, polio) are consistent across stated and revealed priorities. To maximize the benefits of their pre-determined goal of health for all, WHO prioritizes on infectious diseases like Ebola, HIV/AIDS, malaria, measles, and polio.</p> | <p>Yes</p> |

|            |                                                                                                                                                                                                                                                                                                                                                                                                                                                                                                                                                                                                                                                                                                                                                                                                                                                                                                                                                                                                                                                                                                                                                                                                                                                                                                    |                                                                                                                                                                                                                                                                                                                                                                                                                                                                                                                                                                                                                                                                                                                                                                                   |                                                                                                                                                                                                           |                                                                                                                                                                                                                                                                       |                                                                                                                                                                                                                                                                                                                                                                                        |     |
|------------|----------------------------------------------------------------------------------------------------------------------------------------------------------------------------------------------------------------------------------------------------------------------------------------------------------------------------------------------------------------------------------------------------------------------------------------------------------------------------------------------------------------------------------------------------------------------------------------------------------------------------------------------------------------------------------------------------------------------------------------------------------------------------------------------------------------------------------------------------------------------------------------------------------------------------------------------------------------------------------------------------------------------------------------------------------------------------------------------------------------------------------------------------------------------------------------------------------------------------------------------------------------------------------------------------|-----------------------------------------------------------------------------------------------------------------------------------------------------------------------------------------------------------------------------------------------------------------------------------------------------------------------------------------------------------------------------------------------------------------------------------------------------------------------------------------------------------------------------------------------------------------------------------------------------------------------------------------------------------------------------------------------------------------------------------------------------------------------------------|-----------------------------------------------------------------------------------------------------------------------------------------------------------------------------------------------------------|-----------------------------------------------------------------------------------------------------------------------------------------------------------------------------------------------------------------------------------------------------------------------|----------------------------------------------------------------------------------------------------------------------------------------------------------------------------------------------------------------------------------------------------------------------------------------------------------------------------------------------------------------------------------------|-----|
|            | <p>we must put the well-being of women, children and adolescents at the centre of global health and development.</p> <p><b>The health impacts of climate and environmental change.</b> Climate and environmental change impact many aspects of life that are inextricably linked to health – food security, economic livelihoods, air safety and water and sanitation systems – and WHO estimates that 12.6 million people die each year as a result of living or working in an unhealthy environment. To address this, WHO has a key role to play advancing both mitigation and adaptation strategies for climate and environmental change, working in close partnership with other UN agencies and stakeholders.</p> <p><b>A transformed WHO.</b> Building WHO into a more effective, transparent and accountable agency will require striking a balance between bold reform and stability of the organization. To meet the evolving needs and challenges of the 21st century and deliver game-changing, sustainable results, WHO will need to focus its work where it has the most value, broaden and intensify its engagement across stakeholders, attract more predictable, flexible financing, and work to identify and retain the best global talent.” (<a href="#">WHO Priorities</a>)</p> |                                                                                                                                                                                                                                                                                                                                                                                                                                                                                                                                                                                                                                                                                                                                                                                   |                                                                                                                                                                                                           |                                                                                                                                                                                                                                                                       |                                                                                                                                                                                                                                                                                                                                                                                        |     |
| World Bank | <p>“The World Bank Group works in every major area of development. We provide a wide array of financial products and technical assistance, and we help countries share and apply innovative knowledge and solutions to the challenges they face.</p> <p>Three priorities guide our work with countries to <b>end poverty and boost prosperity for the poorest people.</b> Helping create sustainable economic growth, investing in people and building resilience to shocks and threats that can roll back decades of progress.</p> <p><b>Themes</b></p> <ul style="list-style-type: none"> <li>• Economic Policy</li> <li>• Environment and Resource Development</li> <li>• Finance</li> <li>• Human Development and Gender</li> <li>• Private Sector Development</li> <li>• Public Sector Management</li> <li>• Social Development and Protection</li> <li>• Urban and Rural Development” (<a href="#">World Bank Annual Report 2019</a>)</li> </ul>                                                                                                                                                                                                                                                                                                                                             | <p><b>Health Focus Area</b> Focused on ending poverty in the world’s poorest countries, the World Bank’s International Development Association (IDA) disbursed \$1.1 billion of DAH in 2019, down 33.9% from 2018. The International Bank for Reconstruction and Development (IBRD) is a global development cooperative owned by 189 countries. As “the world’s largest development bank,” the IBRD helps countries reduce poverty and extend the benefits of sustainable growth to all people. In 2019, the IBRD disbursed \$11.1 billion of DAH, up 25.4% from 2018. Funds were targeted at <b>reproductive, maternal, newborn, and child health; vaccination programs; infectious diseases; and NCDs.</b></p> <p><b>Region</b> 27.6% of DAH disbursed by development banks</p> | <p><u>Topics from 2016-2020 tweets (no order)</u></p> <p>Africa<br/>Agriculture<br/>Children<br/>Climate change<br/>Food security<br/>Humanitarian aid<br/>Poverty<br/>Sanitation<br/>Water<br/>Women</p> | <p>End poverty and boost prosperity through sustainable economic growth, investing in people, and building resilience to shocks and threats;</p> <p>Maternal and child health, health emergencies, nutrition, infectious diseases, tobacco control, mental health</p> | <p>Child and maternal health and Africa are consistent across DAH data and tweets.</p> <p>Child and maternal health are consistent across stated and revealed priorities.</p> <p>To maximize the benefits of their pre-determined goal of ending poverty and boosting prosperity for the poorest people, the World Bank prioritizes on child and maternal health issues in Africa.</p> | Yes |

|               |                                                                                                                                                                                                                                                                                                                                                                                                                                                                                                                                                                                                                                                                                                                                                                     |                                                                                                                                                                                                                                                                                                                                                                                                                                                                                                                                                                                                                                                                                                            |                                                                                                                                                                                                            |                                                                                                                  |                                                                                                                 |                                                                                                                                                                                                                                                                       |            |
|---------------|---------------------------------------------------------------------------------------------------------------------------------------------------------------------------------------------------------------------------------------------------------------------------------------------------------------------------------------------------------------------------------------------------------------------------------------------------------------------------------------------------------------------------------------------------------------------------------------------------------------------------------------------------------------------------------------------------------------------------------------------------------------------|------------------------------------------------------------------------------------------------------------------------------------------------------------------------------------------------------------------------------------------------------------------------------------------------------------------------------------------------------------------------------------------------------------------------------------------------------------------------------------------------------------------------------------------------------------------------------------------------------------------------------------------------------------------------------------------------------------|------------------------------------------------------------------------------------------------------------------------------------------------------------------------------------------------------------|------------------------------------------------------------------------------------------------------------------|-----------------------------------------------------------------------------------------------------------------|-----------------------------------------------------------------------------------------------------------------------------------------------------------------------------------------------------------------------------------------------------------------------|------------|
|               | <p>"World Bank Health Focus Areas:</p> <ol style="list-style-type: none"> <li>1. <b>Women and children's health</b></li> <li>2. <b>Health emergencies</b></li> <li>3. <b>Nutrition</b></li> <li>4. <b>Infectious diseases</b></li> <li>5. <b>Tobacco control</b></li> <li>6. <b>Mental health"</b></li> </ol> <p><a href="#">(World Bank Health Focus Areas)</a></p>                                                                                                                                                                                                                                                                                                                                                                                                | <p>as group went to <b>sub-Saharan Africa</b> and 20.5% to North Africa and the Middle East.</p>                                                                                                                                                                                                                                                                                                                                                                                                                                                                                                                                                                                                           |                                                                                                                                                                                                            |                                                                                                                  |                                                                                                                 |                                                                                                                                                                                                                                                                       |            |
| <p>UNAIDS</p> | <p><b>"Strategic leadership agenda</b><br/>In the light of the need for change, this Strategy seeks to achieve a set of far-reaching and people-centred goals and targets that must be met by 2020 if we are to reach our 2030 ambition of ending the AIDS epidemic. The goals correspond to each of the three strategic directions, and include achieving by 2020:</p> <ul style="list-style-type: none"> <li>• Fewer than 500 000 people newly infected with HIV</li> <li>• Fewer than 500 000 people dying from AIDS-related causes</li> <li>• Elimination of HIV-related discrimination"</li> </ul> <p><a href="#">(UNAIDS 2016-2021 Strategy)</a></p>                                                                                                          | <p><b>Health Focus Area</b><br/>UNAIDS is leading the global effort to end <b>AIDS</b> as a public health threat by 2030. In addition, the agency is working toward its 2020 90-90-90 targets: for 90% of people living with HIV/AIDS to know their status; for 90% of those diagnosed with infections to receive antiretroviral treatments; and for 90% of patients receiving antiretroviral therapy to have viral suppression. In 2019, the agency disbursed \$207.3 million, up 1.7% from 2018. The top five contributors to UNAIDS in 2019 were the US, Sweden, the Netherlands, the UK, and Norway.</p> <p><b>Region</b><br/>DAH data for UNAIDS in 2019 have unallocated or unspecified regions.</p> | <p><b>Topics from 2016-2020 tweets (no order)</b></p> <p>Access<br/>Africa<br/>Discrimination<br/>HIV/AIDS<br/>Human Rights<br/>Innovation<br/>Prevention<br/>Testing<br/>Treatment<br/>Women</p>          | <p>Ending the AIDS epidemic by 2030.</p>                                                                         | <p>HIV/AIDS prevention, testing, and treatment is consistent across DAH data and tweets.</p>                    | <p>HIV/AIDS prevention, testing, and treatment are consistent across stated and revealed priorities.</p> <p>To maximize benefits of their pre-determined goal of ending the AIDS epidemic by 2030, UNAIDS focuses on HIV/AIDS prevention, testing, and treatment.</p> | <p>Yes</p> |
| <p>UNFPA</p>  | <p>"Our goal is to achieve <b>universal access to sexual and reproductive health, realize reproductive rights, and reduce maternal mortality</b> to accelerate progress on the agenda of the Programme of Action of the International Conference on Population and Development (ICPD), to <b>improve the lives of women, adolescents and youth</b>, enabled by population dynamics, human rights and gender equality.</p> <p><b>Priority Areas</b></p> <ul style="list-style-type: none"> <li>• Sexual and reproductive health services and reproductive rights</li> <li>• Adolescent and youth empowerment</li> <li>• Gender equality and women's empowerment</li> <li>• Population data for development"</li> </ul> <p><a href="#">(UNFPA Strategic Plan)</a></p> | <p><b>Health Focus Area</b><br/>The United Nations Population Fund (UNFPA) is the United Nations' <b>sexual and reproductive health</b> agency. UNFPA's programs include the Maternal and Newborn Health Thematic Fund, focused on preventing maternal deaths through strategic interventions. Training midwives and ending fistula, a childbirth injury caused by prolonged obstructed labor, are also part of the <b>Maternal and Newborn Health Thematic Fund</b>. In 2019, UNFPA disbursed \$1.1 billion in DAH, down 1.7% from 2018. Of this, UNFPA received \$466.8 million, or 43.8% from governments. In</p>                                                                                       | <p><b>Topics from 2016-2020 tweets (no order)</b></p> <p>Africa<br/>Child Marriage<br/>Children<br/>Family planning<br/>FGM<br/>Human Rights<br/>Humanitarian Aid<br/>Nutrition<br/>Violence<br/>Women</p> | <p>Universal access to sexual and reproductive health, reproductive rights, maternal mortality, child health</p> | <p>Sexual and reproductive health, and maternal and child health are consistent across DAH data and tweets.</p> | <p>HIV/AIDS prevention, testing, and treatment are consistent across stated and revealed priorities.</p> <p>To maximize benefits of their pre-determined goal of ending the AIDS epidemic by 2030, UNAIDS focuses on HIV/AIDS prevention, testing, and treatment.</p> | <p>Yes</p> |

|         |                                                                                                                                                                                                                                                                                                                                                                                                                                                                                                                                                                                                                                                                                                                                                                                                                                                                                                                                                                                                                                                         |                                                                                                                                                                                                                                                                                                                                                                                                                                                                                                                                                                                               |                                                                                                                                                                                                  |                                                                                                                                     |                                                                                                                                    |                                                                                                                                                                                                                                                                                                             |     |
|---------|---------------------------------------------------------------------------------------------------------------------------------------------------------------------------------------------------------------------------------------------------------------------------------------------------------------------------------------------------------------------------------------------------------------------------------------------------------------------------------------------------------------------------------------------------------------------------------------------------------------------------------------------------------------------------------------------------------------------------------------------------------------------------------------------------------------------------------------------------------------------------------------------------------------------------------------------------------------------------------------------------------------------------------------------------------|-----------------------------------------------------------------------------------------------------------------------------------------------------------------------------------------------------------------------------------------------------------------------------------------------------------------------------------------------------------------------------------------------------------------------------------------------------------------------------------------------------------------------------------------------------------------------------------------------|--------------------------------------------------------------------------------------------------------------------------------------------------------------------------------------------------|-------------------------------------------------------------------------------------------------------------------------------------|------------------------------------------------------------------------------------------------------------------------------------|-------------------------------------------------------------------------------------------------------------------------------------------------------------------------------------------------------------------------------------------------------------------------------------------------------------|-----|
|         |                                                                                                                                                                                                                                                                                                                                                                                                                                                                                                                                                                                                                                                                                                                                                                                                                                                                                                                                                                                                                                                         | 2018, the US withheld funding from UNFPA for the third year in a row under the Kemp-Kasten amendment.                                                                                                                                                                                                                                                                                                                                                                                                                                                                                         |                                                                                                                                                                                                  |                                                                                                                                     |                                                                                                                                    |                                                                                                                                                                                                                                                                                                             |     |
|         |                                                                                                                                                                                                                                                                                                                                                                                                                                                                                                                                                                                                                                                                                                                                                                                                                                                                                                                                                                                                                                                         | <u>Region</u><br>DAH data for UNFPA in 2019 have unallocated or unspecified regions.                                                                                                                                                                                                                                                                                                                                                                                                                                                                                                          |                                                                                                                                                                                                  |                                                                                                                                     |                                                                                                                                    |                                                                                                                                                                                                                                                                                                             |     |
| UNICEF  | <p><b>"Vision:</b> Realizing the rights of every child, especially the most disadvantaged.</p> <p><b>Goal areas:</b></p> <ul style="list-style-type: none"> <li>• Every child survives and thrives</li> <li>• Every child learns</li> <li>• Every child is protected from violence and exploitation</li> <li>• Every child lives in a safe and clean environment</li> <li>• Every child has an equitable chance in life" (<a href="#">UNICEF Strategic Plan 2018-2021</a>)</li> </ul>                                                                                                                                                                                                                                                                                                                                                                                                                                                                                                                                                                   | <p><u>Health Focus Area</u><br/>UNICEF provides long-term <b>humanitarian and development assistance to children and mothers</b>, with a specific focus on <b>nutrition, immunization, and HIV/AIDS</b>, as well as <b>emergency (i.e., pandemic) assistance</b>.</p> <p>UNICEF disbursed \$2.6 billion in DAH in 2019, up 12.5% from 2018. Private philanthropies provided UNICEF with \$519.3 million, or 19.8% of its funding in 2019, and the US contributed \$316.9 million, or 12.1%.</p> <p><u>Region</u><br/>DAH data for UNICEF in 2019 have unallocated or unspecified regions.</p> | <p><u>Topics from 2016-2020 tweets (no order)</u></p> <p>Africa<br/>Breastfeeding<br/>Children<br/>Climate Change<br/>Ebola<br/>Education<br/>Human Rights<br/>Online<br/>Violence<br/>Water</p> | <p>Realizing the rights of every child, especially the most disadvantaged.</p> <p>Health related: child health, child mortality</p> | <p>Child and maternal health are consistent across DAH data and tweets.</p>                                                        | <p>Child and maternal health are consistent across stated and revealed priorities.</p> <p>To maximize benefits of their pre-determined goal of realizing the rights of every child, UNICEF focuses on child and maternal health.</p>                                                                        | Yes |
| UNITAID | <p>"Unitaid's Strategy for 2017-2021 is firmly grounded in its Constitution, which states that Unitaid aims to 'contribute to scale up access to treatment for <b>HIV/AIDS, malaria and tuberculosis</b> for the people in developing countries by <b>leveraging price reductions of quality drugs and diagnostics</b>, which currently are unaffordable for most developing countries, and to accelerate the pace at which they are made available.' Innovation, access, and scalability. They guide the design of unitaid's interventions, which</p> <ul style="list-style-type: none"> <li>• Promote innovation. Unitaid connects those who are developing innovations with people who need them the most. Innovation means both using existing commodities in new ways and developing new products and approaches.</li> <li>• Catalyze equitable access to better health products. Unitaid leverages its market expertise and its relationships with partners to design a portfolio of projects that will overcome barriers to access to</li> </ul> | <p><u>Health Focus Area</u><br/>In 2019, Unitaid disbursed \$154.1 million in DAH, up 35.2% from 2018. Projects Unitaid has been working on include a net program to combat malaria and a program to distribute and promote HIV self-testing kits in Africa. US contributed \$316.9 million, or 12.1%.</p> <p><u>Region</u><br/>DAH data for UNITAID in 2019 have unallocated or unspecified regions.</p>                                                                                                                                                                                     | <p><u>Topics from 2016-2020 tweets (no order)</u></p> <p>Access<br/>Cancer<br/>Children<br/>Hepatitis<br/>HIV/AIDS<br/>Malaria<br/>Testing<br/>Treatment<br/>Tuberculosis<br/>Vaccines</p>       | <p>Access to treatment of, affordability of drugs, and innovation in addressing HIV/AIDS, malaria, tuberculosis</p>                 | <p>Increasing access, testing, and treatment of HIV/AIDS, malaria, and tuberculosis are consistent across DAH data and tweets.</p> | <p>HIV/AIDS, malaria, and tuberculosis are consistent across stated and revealed priorities.</p> <p>To maximize benefits of their pre-determined goal of scaling up treatment for HIV/AIDS, malaria, and tuberculosis in developing countries, UNITAID prioritizes HIV/AIDS, malaria, and tuberculosis.</p> | Yes |

|             |                                                                                                                                                                                                                                                                                                                                                                                                                                                                                                                                                                                                                                                                                                                                                                                                                                                                                                                                                                                                                                                                                                                                                                                                                                              |                                                                                                                                                                                                                                                                                                                                                                                                                                                                                                                                              |                                                                                                                                                                                    |                                                                                                  |                                                                                                              |                                                                                                                                                                                                                                                                                                                                                                  |     |
|-------------|----------------------------------------------------------------------------------------------------------------------------------------------------------------------------------------------------------------------------------------------------------------------------------------------------------------------------------------------------------------------------------------------------------------------------------------------------------------------------------------------------------------------------------------------------------------------------------------------------------------------------------------------------------------------------------------------------------------------------------------------------------------------------------------------------------------------------------------------------------------------------------------------------------------------------------------------------------------------------------------------------------------------------------------------------------------------------------------------------------------------------------------------------------------------------------------------------------------------------------------------|----------------------------------------------------------------------------------------------------------------------------------------------------------------------------------------------------------------------------------------------------------------------------------------------------------------------------------------------------------------------------------------------------------------------------------------------------------------------------------------------------------------------------------------------|------------------------------------------------------------------------------------------------------------------------------------------------------------------------------------|--------------------------------------------------------------------------------------------------|--------------------------------------------------------------------------------------------------------------|------------------------------------------------------------------------------------------------------------------------------------------------------------------------------------------------------------------------------------------------------------------------------------------------------------------------------------------------------------------|-----|
|             | <p>innovative health products</p> <ul style="list-style-type: none"> <li>Create the right conditions for scale up, so better health products reach all people who need them. From conception through implementation, Unitaid works with partners to ensure that projects transition to scale.” (<a href="#">Unitaid Strategy 2017-2021</a>)</li> </ul>                                                                                                                                                                                                                                                                                                                                                                                                                                                                                                                                                                                                                                                                                                                                                                                                                                                                                       |                                                                                                                                                                                                                                                                                                                                                                                                                                                                                                                                              |                                                                                                                                                                                    |                                                                                                  |                                                                                                              |                                                                                                                                                                                                                                                                                                                                                                  |     |
| Gavi        | <p>“Our 2016–2020 mission, to <b>save children’s lives and protect people’s health by increasing equitable use of vaccines in lower-income countries</b>, is guided by four strategic goals</p> <ol style="list-style-type: none"> <li>1. Accelerate equitable uptake and coverage of vaccines.</li> <li>2. Increase effectiveness and efficiency of immunisation delivery as an integrated part of strengthened health systems.</li> <li>3. Improve sustainability of national immunisation programmes.</li> <li>4. Shape markets for vaccines and other immunisation products.</li> </ol> <p>The current five-year strategy was approved by the Board in June 2014 – the full implementation of the strategy will see developing countries immunise 300 million children, saving 5–6 million lives in the long term. <b>Coverage and equity</b> are at the core of our current strategy. While we continue to support countries to introduce new vaccines, our focus is expanding to reach every child with these vaccines. With as many as 20 countries transitioning out of our financial support in this period, ensuring that programmes are sustainable in the long term is essential.” (<a href="#">Gavi Strategy 2016-2020</a>)</p> | <p><u>Health Focus Area</u><br/>In 2019, Gavi channeled \$1.8 billion in development assistance for health to <b>child health</b> (94.4% of Gavi funding) and non-communicable disease-related programs. Top sources of funding for Gavi in 2019 were the Bill &amp; Melinda Gates Foundation, the United States, and the United Kingdom.</p> <p><u>Region</u><br/>In 2017, 52.6% of DAH disbursed by Gavi went to <b>sub-Saharan Africa</b> and 25.5% to South Asia. DAH data for Gavi in 2019 have unallocated or unspecified regions.</p> | <p><u>Topics from 2016-2020 tweets (no order)</u></p> <p>Africa<br/>Cancer<br/>Children<br/>Cholera<br/>Ebola<br/>Measles<br/>Pneumonia<br/>Polio<br/>Poverty<br/>Vaccines</p>     | <p>Increasing overall coverage and equity in vaccinating children in lower-income countries.</p> | <p>Child health, vaccination, infectious diseases, and Africa are consistent across DAH data and tweets.</p> | <p>Child health, vaccination, infectious diseases, and Africa are consistent across stated and revealed priorities.</p> <p>To maximize benefits of their pre-determined goal of “saving children’s lives by increasing equitable use of vaccines in lower-income countries”, Gavi prioritizes child health and vaccination of infectious diseases in Africa.</p> | Yes |
| Global Fund | <p>“The Global Fund Strategy 2017-2022: Investing to End Epidemics outlines our partnership’s bold agenda for 2017-2022 based on an ambitious vision <b>to end the epidemics</b>. These four strategic objectives are at the core of the strategy:</p> <ul style="list-style-type: none"> <li>• Maximize impact against <b>HIV, TB, and Malaria</b></li> <li>• Promote and protect <b>human rights and gender equality</b></li> <li>• Mobilize increased resources</li> <li>• Build <b>resilient and sustainable systems for health</b>” (<a href="#">Global</a>)</li> </ul>                                                                                                                                                                                                                                                                                                                                                                                                                                                                                                                                                                                                                                                                 | <p><u>Health Focus Area</u><br/>In 2019, the Global Fund channeled a total of \$3.5 billion to programs worldwide. Leading sources of Global Fund contributions were the United States, the United Kingdom, and Japan. The UK provided \$817.1 million or 23.3% to the Global Fund in 2019, more than any other contributor. The US contributed \$636.5 million or 18.1%, Japan contributed \$442.4 million or 12.6%, and Germany</p>                                                                                                        | <p><u>Topics from 2016-2020 tweets (no order)</u></p> <p>Africa<br/>Children<br/>Cholera<br/>Ebola<br/>HIV/AIDS<br/>Malaria<br/>Pneumonia<br/>Polio<br/>Tuberculosis<br/>Women</p> | <p>To end HIV/AIDS, malaria, and tuberculosis epidemics</p>                                      | <p>HIV/AIDS, malaria, tuberculosis, and Africa are consistent across DAH data and tweets.</p>                | <p>HIV/AIDS, malaria, tuberculosis, and Africa are consistent across stated and revealed priorities.</p> <p>To maximize benefits of their pre-determined goal of “ending the epidemics”, the Global Fund prioritizes child health and vaccination of</p>                                                                                                         | Yes |

|            |                                                                                                                                                                                                                                                                                                                                                                                                                                                                                                                                                                                                                                                                                                                                                                                                                                                                                                                                                                                                                                                                                                                                                                                                                                                                                                                              |                                                                                                                                                                                                                                                                                                                                                                                                                                                                                                                                                                       |                                                                                                                                                                                   |                                                                                                           |                                                                                              |                                                                                                                                                                                                                                                                                                     |            |
|------------|------------------------------------------------------------------------------------------------------------------------------------------------------------------------------------------------------------------------------------------------------------------------------------------------------------------------------------------------------------------------------------------------------------------------------------------------------------------------------------------------------------------------------------------------------------------------------------------------------------------------------------------------------------------------------------------------------------------------------------------------------------------------------------------------------------------------------------------------------------------------------------------------------------------------------------------------------------------------------------------------------------------------------------------------------------------------------------------------------------------------------------------------------------------------------------------------------------------------------------------------------------------------------------------------------------------------------|-----------------------------------------------------------------------------------------------------------------------------------------------------------------------------------------------------------------------------------------------------------------------------------------------------------------------------------------------------------------------------------------------------------------------------------------------------------------------------------------------------------------------------------------------------------------------|-----------------------------------------------------------------------------------------------------------------------------------------------------------------------------------|-----------------------------------------------------------------------------------------------------------|----------------------------------------------------------------------------------------------|-----------------------------------------------------------------------------------------------------------------------------------------------------------------------------------------------------------------------------------------------------------------------------------------------------|------------|
|            | <p><a href="#">Fund Strategy 2017-2022</a></p>                                                                                                                                                                                                                                                                                                                                                                                                                                                                                                                                                                                                                                                                                                                                                                                                                                                                                                                                                                                                                                                                                                                                                                                                                                                                               | <p>contributed \$396.7 million or 11.3%.</p> <p>50.4% of funding were allocated to address <b>HIV/AIDS</b>, 31.7% to <b>Malaria</b>, and 17.8% to <b>Tuberculosis</b>.</p> <p><u>Region</u><br/>In 2019, 72.7% of DAH disbursed by the Global Fund went to <b>sub-Saharan Africa</b> and 10.5% to Southeast Asia, East Asia, and Oceania. DAH data for the Global Fund in 2019 have unallocated or unspecified regions.</p>                                                                                                                                           |                                                                                                                                                                                   |                                                                                                           |                                                                                              | <p>infectious diseases in Africa.</p>                                                                                                                                                                                                                                                               |            |
| <p>CDC</p> | <p>“CDC’s Strategic Framework consists of five core capabilities that enable the agency’s three strategic priorities, all united behind one mission: <b>protect America’s safety, health, and security</b>. Our work is underscored by the agency’s Pledge to the American People.</p> <p><b>Strategic Priorities</b></p> <ul style="list-style-type: none"> <li>Securing global health and America’s preparedness             <ul style="list-style-type: none"> <li>By stopping the spread of pandemic contagions, addressing public health terror threats, and protecting people from vector-borne diseases.</li> </ul> </li> <li>Eliminating disease             <ul style="list-style-type: none"> <li>By controlling vaccine-preventable disease, targeting Hepatitis C, and reducing the maternal mortality rate.</li> </ul> </li> <li>Ending epidemics             <ul style="list-style-type: none"> <li>Such as HIV, decreasing opioid overdoses, improving strategies and interventions to stem seasonal influenza, developing and deploying new answers for antibiotic resistance, and reducing new incidents of diabetes.</li> </ul> </li> </ul> <p><b>Core Capabilities</b></p> <ul style="list-style-type: none"> <li>World-class data and analytics</li> <li>State-of-the-art laboratory capacity</li> </ul> | <p><u>Health Focus Area</u><br/>Protecting Americans from Infectious Diseases at Home and Abroad (\$3.0 billion)<br/>Preventing the Leading Causes of Disease, Disability, &amp; Death (\$2.0 billion)<br/>Protecting Americans from Natural Disasters, Terrorist Threats, Environmental &amp; Occupational Hazards (\$1.5 billion)<br/>Monitoring Health &amp; Ensuring Laboratory Excellence (\$496 million)<br/>Cross-cutting Support &amp; PHS Block Grant &amp; Buildings &amp; Facilities (\$357 million)</p> <p><u>Region</u><br/>United States and global</p> | <p><u>Topics from 2016-2020 tweets (no order)</u></p> <p>Children<br/>Diarrhea<br/>E. Coli<br/>influenza<br/>Measles<br/>Prevention<br/>Vaccines<br/>Water<br/>Women<br/>Zika</p> | <p>National security from infectious diseases</p> <p>Securing global health and national preparedness</p> | <p>Protecting the USA from infectious diseases is consistent across DAH data and tweets.</p> | <p>HIV/AIDS, malaria, tuberculosis, and Africa are consistent across stated and revealed priorities.</p> <p>To maximize benefits of their pre-determined goal of “protecting America’s safety, health, and security”, the CDC prioritizes infectious disease protection in the US and globally.</p> | <p>Yes</p> |



|        |                                                                                                                                                                                                                                                                                                                                                                                                                                                                                                                                                                                                                                                                                                                                                                                                                                                                                                                                                                                                                   |                                                                                                                                                                                                                                                                                                                                                                                                                               |                                                                                                                                                                                                  |                                                                                              |                                                                                                           |                                                                                                                                                                                                                                                                                                                                                           |     |
|--------|-------------------------------------------------------------------------------------------------------------------------------------------------------------------------------------------------------------------------------------------------------------------------------------------------------------------------------------------------------------------------------------------------------------------------------------------------------------------------------------------------------------------------------------------------------------------------------------------------------------------------------------------------------------------------------------------------------------------------------------------------------------------------------------------------------------------------------------------------------------------------------------------------------------------------------------------------------------------------------------------------------------------|-------------------------------------------------------------------------------------------------------------------------------------------------------------------------------------------------------------------------------------------------------------------------------------------------------------------------------------------------------------------------------------------------------------------------------|--------------------------------------------------------------------------------------------------------------------------------------------------------------------------------------------------|----------------------------------------------------------------------------------------------|-----------------------------------------------------------------------------------------------------------|-----------------------------------------------------------------------------------------------------------------------------------------------------------------------------------------------------------------------------------------------------------------------------------------------------------------------------------------------------------|-----|
|        | <ul style="list-style-type: none"> <li>Elite public health expertise</li> <li>Responding to outbreaks at their source</li> <li>Global capacity and domestic preparedness” (<a href="#">CDC Strategic Framework</a>)</li> </ul>                                                                                                                                                                                                                                                                                                                                                                                                                                                                                                                                                                                                                                                                                                                                                                                    |                                                                                                                                                                                                                                                                                                                                                                                                                               |                                                                                                                                                                                                  |                                                                                              |                                                                                                           |                                                                                                                                                                                                                                                                                                                                                           |     |
| EU CDC | <p>““ECDC is an EU agency aimed at <b>strengthening Europe's defences against infectious diseases</b>. The core functions cover a wide spectrum of activities: surveillance, epidemic intelligence, response, scientific advice, microbiology, preparedness, public health training, international relations, health communication, and the scientific journal Eurosurveillance.</p> <p><b>Strategic Work Areas</b></p> <ul style="list-style-type: none"> <li>Providing evidence for effective and efficient decision-making: We support efficient public health decisionmaking by providing <b>timely, accurate and relevant information</b>.</li> <li>Support the <b>strengthening of public health systems</b>: We strengthen European capacities and capabilities effectively prevent and control communicable diseases.</li> <li>Supporting <b>response to threats</b>: We support effective health threats detection, assessment and control.”</li> </ul> <p>(<a href="#">ECDC Annual Report 2019</a>)</p> | <p><b>Health Focus Area</b><br/>All funding is spent on expenses for staff, buildings and equipment, and operations for surveillance, research, and response to infectious disease epidemics.</p> <p><u>Region</u><br/>European Union and global</p>                                                                                                                                                                          | <p><u>Topics from 2016-2020 tweets (no order)</u></p> <p>Ebola<br/>Hepatitis<br/>HIV/AIDS<br/>Influenza<br/>Measles<br/>Outbreaks<br/>Report<br/>Surveillance<br/>Tuberculosis<br/>West Nile</p> | European security from infectious disease                                                    | Infectious disease surveillance, reporting, and research are consistent across DAH data and tweets.       | Infectious disease surveillance, reporting, and research are consistent across stated and revealed priorities.<br><br>To maximize benefits of their pre-determined goal of “strengthening Europe’s defences against infectious diseases”, the EU CDC prioritizes infectious disease surveillance, reporting, and research.                                | Yes |
| NIH    | <p>“NIH’s mission is to seek fundamental knowledge about the nature and behavior of living systems and the application of that knowledge to enhance health, lengthen life, and reduce illness and disability.</p> <p>The goals of the agency are:</p> <ul style="list-style-type: none"> <li>to foster <b>fundamental creative discoveries, innovative research strategies</b>, and their applications as a basis for ultimately <b>protecting and improving health</b>;</li> <li>to develop, maintain, and renew scientific human and physical resources that will <b>ensure the Nation’s capability to prevent disease</b>;</li> <li>to expand the knowledge base in medical and associated sciences in order to enhance the Nation’s economic well-being and ensure a continued high return on the public</li> </ul>                                                                                                                                                                                           | <p><b>Health Focus Area</b><br/>In 2019, NIH had a \$39.2B discretionary budget.</p> <ol style="list-style-type: none"> <li>NCI (14.7%) – cancer</li> <li>NIAID (14.1%) – allergy and infectious disease</li> <li>NHLBI (8.9%) – heart, lung, and blood</li> <li>NIA (7.9%) – instate on aging</li> <li>NIGMS (7.3%) – general medical sciences</li> </ol> <p><u>Region</u><br/>United States (with some global research)</p> | <p><u>Topics from 2016-2020 tweets (no order)</u></p> <p>Africa<br/>Cancer<br/>Funding<br/>Heart Disease<br/>HIV/AIDS<br/>News<br/>Rare Disease<br/>Research<br/>Stress<br/>Veterans</p>         | National security through developing new knowledge in enhancing health and lengthening life. | Research on cancer, HIV/AIDS, heart disease, and rare diseases are consistent across DAH data and tweets. | Research on cancer, HIV/AIDS, heart disease, and rare diseases are consistent across stated and revealed priorities.<br><br>To maximize benefits of their pre-determined goal of seeking knowledge to enhance life and ensure the US’s capability to prevent disease, the NIH prioritizes research on cancer, HIV/AIDS, heart disease, and rare diseases. | Yes |

|      |                                                                                                                                                                                                                                                                                                                                                                                                                                                                                                                                                                                                                                                                                                                                                                                                                                                                                                                                                                                                                                                            |                                                                                                                                                                                                                                                                                                  |                                                                                                                                                                                                        |                                                                                                       |                                                                                            |                                                                                                                                                                                                                                                                                        |     |
|------|------------------------------------------------------------------------------------------------------------------------------------------------------------------------------------------------------------------------------------------------------------------------------------------------------------------------------------------------------------------------------------------------------------------------------------------------------------------------------------------------------------------------------------------------------------------------------------------------------------------------------------------------------------------------------------------------------------------------------------------------------------------------------------------------------------------------------------------------------------------------------------------------------------------------------------------------------------------------------------------------------------------------------------------------------------|--------------------------------------------------------------------------------------------------------------------------------------------------------------------------------------------------------------------------------------------------------------------------------------------------|--------------------------------------------------------------------------------------------------------------------------------------------------------------------------------------------------------|-------------------------------------------------------------------------------------------------------|--------------------------------------------------------------------------------------------|----------------------------------------------------------------------------------------------------------------------------------------------------------------------------------------------------------------------------------------------------------------------------------------|-----|
|      | <p>investment in research; and</p> <ul style="list-style-type: none"> <li>to exemplify and promote the highest level of scientific integrity, public accountability, and social responsibility in the conduct of science.</li> </ul> <p>In realizing these goals, the NIH provides leadership and direction to programs designed to improve the health of the Nation by conducting and supporting research:</p> <ul style="list-style-type: none"> <li>in the <b>causes, diagnosis, prevention, and cure of human diseases;</b></li> <li>in the processes of human growth and development;</li> <li>in the biological effects of environmental contaminants;</li> <li>in the <b>understanding of mental, addictive and physical disorders;</b> and</li> <li>in directing programs for the collection, dissemination, and exchange of information in medicine and health, including the development and support of medical libraries and the training of medical librarians and other health information specialists.</li> </ul>                            |                                                                                                                                                                                                                                                                                                  |                                                                                                                                                                                                        |                                                                                                       |                                                                                            |                                                                                                                                                                                                                                                                                        |     |
| FAO  | <p>"Today, member states face an increasing number of demands and challenges in agricultural development. To support them, FAO has identified five key priorities on which it is best placed to intervene. These priorities, or Strategic Objectives, represent our main areas of work to achieve our <b>vision of a world free from hunger and malnutrition, where food and agriculture help to improve the living standards of all</b>, especially the poorest, in an economically, socially and environmentally sustainable manner – contributing to the implementation of the 2030 Agenda for Sustainable Development.</p> <ol style="list-style-type: none"> <li><b>Help eliminate hunger, food insecurity, and malnutrition</b></li> <li>Make agriculture, forestry, and fisheries more productive and sustainable</li> <li>Reduce rural poverty</li> <li>Enable inclusive and efficient agricultural food systems</li> <li>Increase the resilience of livelihoods to threats and crises" (<a href="#">FAO Strategic Objectives 2019</a>)</li> </ol> | <p><u>Health Focus Area</u><br/>All received funding is spent on staffing and program expenses in addressing hunger, food insecurity, malnutrition, and improving resiliency of food systems.</p> <p><u>Region</u><br/>Funding data for FAO in 2019 have unallocated or unspecified regions.</p> | <p><u>Topics from 2016-2020 tweets (no order)</u></p> <p>Africa<br/>Agriculture<br/>Biodiversity<br/>Climate Change<br/>Families<br/>Farmers<br/>Fisheries<br/>Food Security<br/>Forests<br/>Water</p> | Addressing hunger, food insecurity, and malnutrition through improving food and agricultural systems. | Food insecurity, malnutrition, and food systems are consistent across DAH data and tweets. | Food insecurity, malnutrition, and food systems are consistent across stated and revealed priorities.<br><br>To maximize benefits of their pre-determined goal of a world free from hunger and malnutrition, the FAO prioritizes eliminating hunger, food insecurity, and malnutrition | Yes |
| UNDP | "UNDP's Strategic Plan (2018-2021) has been designed to be                                                                                                                                                                                                                                                                                                                                                                                                                                                                                                                                                                                                                                                                                                                                                                                                                                                                                                                                                                                                 | <u>Total budget allocation</u>                                                                                                                                                                                                                                                                   | <u>Topics from 2016-2020 tweets</u>                                                                                                                                                                    | Poverty eradication,                                                                                  | HIV/AIDS, malaria, and                                                                     | HIV/AIDS, malaria, and                                                                                                                                                                                                                                                                 | Yes |

|            |                                                                                                                                                                                                                                                                                                                                                                                                                                                                                                                                                                                                                                                                                                                                                                                                                                                                                                                                                                                                                                                                                                                                                                                                                                                                                                                       |                                                                                                                                                                                                                                                                                                                                                                                                                                                                                                                                                                                                                             |                                                                                                                                                                                                       |                                                                                                                                                                                                                                                                                                                                                                                                                                 |                                                                                                                     |                                                                                                                                                                                                                                                                                                                                               |            |
|------------|-----------------------------------------------------------------------------------------------------------------------------------------------------------------------------------------------------------------------------------------------------------------------------------------------------------------------------------------------------------------------------------------------------------------------------------------------------------------------------------------------------------------------------------------------------------------------------------------------------------------------------------------------------------------------------------------------------------------------------------------------------------------------------------------------------------------------------------------------------------------------------------------------------------------------------------------------------------------------------------------------------------------------------------------------------------------------------------------------------------------------------------------------------------------------------------------------------------------------------------------------------------------------------------------------------------------------|-----------------------------------------------------------------------------------------------------------------------------------------------------------------------------------------------------------------------------------------------------------------------------------------------------------------------------------------------------------------------------------------------------------------------------------------------------------------------------------------------------------------------------------------------------------------------------------------------------------------------------|-------------------------------------------------------------------------------------------------------------------------------------------------------------------------------------------------------|---------------------------------------------------------------------------------------------------------------------------------------------------------------------------------------------------------------------------------------------------------------------------------------------------------------------------------------------------------------------------------------------------------------------------------|---------------------------------------------------------------------------------------------------------------------|-----------------------------------------------------------------------------------------------------------------------------------------------------------------------------------------------------------------------------------------------------------------------------------------------------------------------------------------------|------------|
|            | <p>responsive to the wide diversity of the countries we serve. The diversity is reflected in three broad development contexts:</p> <ul style="list-style-type: none"> <li>• Eradicate poverty in all its forms and dimensions</li> <li>• Accelerate structural transformations</li> <li>• Build resilience to shocks and crises</li> </ul> <p>To respond to these issues, and better focus its resources and expertise to deliver on the 2030 Agenda, UNDP has identified a set of approaches that we call our Signature Solutions:</p> <ul style="list-style-type: none"> <li>• Keeping people out of POVERTY</li> <li>• GOVERNANCE for peaceful, just, and inclusive societies</li> <li>• Crisis prevention and increased RESILIENCE</li> <li>• ENVIRONMENT: nature-based solutions for development</li> <li>• Clean, affordable ENERGY</li> <li>• Women's empowerment and GENDER equality</li> </ul> <p>In all our activities, we encourage the <b>protection of human rights and the empowerment of women, minorities and the poorest and most vulnerable.</b> (<a href="#">UNDP About us</a>)</p> <p>UNDP is the lead development agency in helping the achievement of the Sustainable Development Goals.</p> <p><b>SDG 3: Ensure healthy lives and promote well-being for all at all ages. (UNDP: SDGs)</b></p> | <p>\$5.7 billion budget in 2019</p> <p><u>By UNDP focus</u><br/>Eradicating poverty (43%), accelerate structural transformations (32%), build resilience to shocks and crises (11.5%), others (13.2%)</p> <p><u>By health focus area</u><br/>SDG3 was allotted \$504M (9% of total budget in 2019 –55% to HIV/AIDS, tuberculosis, and malaria (target 3.3), 26% to universal health coverage (target 3.8), 9% to child mortality (target 3.2)</p> <p><u>Region</u><br/>23% of 2019 budget was allocated to Africa, 19% to Asia and the Pacific, 18% to Latin America and the Caribbean.</p>                                 | <p>(no order)</p> <p>Africa<br/>Children<br/>Climate Change<br/>Education<br/>FGM<br/>Food Security<br/>HIV/AIDS<br/>Malaria<br/>Water<br/>Women</p>                                                  | <p>accelerate structural transformations, build resilience to shocks and crises</p> <p>SDG 3: Ensure healthy lives and promote well-being for all at all ages (includes: maternal mortality, child mortality, HIV/AIDS, tuberculosis, malaria, infectious diseases, mental health, substance abuse, road traffic accidents, sexual and reproductive health, universal health coverage, deaths from environmental pollution)</p> | <p>child and maternal health are consistent across DAH data and tweets.</p>                                         | <p>child and maternal health are consistent across stated and revealed preferences.</p> <p>To maximize benefits of their pre-determined global health goal of ensuring healthy lives and promoting well-being for all, the UNDP prioritizes HIV/AIDS, malaria, and child and maternal health.</p>                                             |            |
| <p>MSF</p> | <p>“Médecins Sans Frontières brings <b>medical humanitarian assistance</b> to victims of <b>conflict, natural disasters, epidemics or healthcare exclusion</b>” (<a href="#">MSF About Us</a>)</p> <p>“Program Priorities</p> <ul style="list-style-type: none"> <li>• Outpatient consultations</li> <li>• Birth assistance (including C-section)</li> <li>• Cholera treatment</li> <li>• Inpatient care</li> <li>• Vaccinations against measles</li> <li>• Malaria treatment</li> <li>• Sexual violence</li> <li>• Meningitis treatment</li> <li>• Inpatient feeding programs for malnourished children</li> <li>• TB treatment</li> <li>• HIV ART treatment</li> <li>• Mental health services</li> <li>• Distribution of relief goods”</li> </ul> <p>(<a href="#">International Activity Report 2019</a>)</p>                                                                                                                                                                                                                                                                                                                                                                                                                                                                                                       | <p><u>Health Focus Area</u><br/>“81% of our financial resources are allocated to fulfilling our social mission: 65% to our humanitarian programmes, 12% to support our projects and programmes, and 4% to awareness-raising, the Access Campaign, and the Drugs for Neglected Diseases initiative (DNDi). The rest is spent on general management and fundraising costs. We also maintain reserves that allow us to respond immediately to a crisis without having to wait for an appeal.”</p> <p>Funding is allocated mostly to outpatient consultations, malaria treatment, and birth assistance</p> <p><u>Region</u></p> | <p><u>Topics from 2016-2020 tweets</u><br/>(no order)</p> <p>Africa<br/>Children<br/>Cholera<br/>Ebola<br/>HIV/AIDS<br/>Humanitarian Aid<br/>Refugees<br/>Treatment<br/>Tuberculosis<br/>Violence</p> | <p>Medical humanitarian assistance to victims of conflict, natural disasters, epidemics, or healthcare exclusion.</p>                                                                                                                                                                                                                                                                                                           | <p>Humanitarian aid, HIV/AIDS, infectious diseases, and child health are consistent across DAH data and tweets.</p> | <p>Humanitarian aid, HIV/AIDS, infectious diseases, and child health are consistent across stated and revealed preferences.</p> <p>To maximize benefits of their pre-determined goal of bringing medical humanitarian assistance to victims of crises, MSF prioritizes humanitarian aid, HIV/AIDS, infectious diseases, and child health.</p> | <p>Yes</p> |

|                   |                                                                                                                                                                                                                                                                                                                                                                                                                                                                                                                                                                                                                                                                                                                                                                                                                                                                                           |                                                                                                                                                                                                                                                                                                                                                                                                                                                                                                          |                                                                                                                                                                                                      |                                                                                                                                                                                |                                                                                                                                      |                                                                                                                                                                                                                                                                                                                          |     |
|-------------------|-------------------------------------------------------------------------------------------------------------------------------------------------------------------------------------------------------------------------------------------------------------------------------------------------------------------------------------------------------------------------------------------------------------------------------------------------------------------------------------------------------------------------------------------------------------------------------------------------------------------------------------------------------------------------------------------------------------------------------------------------------------------------------------------------------------------------------------------------------------------------------------------|----------------------------------------------------------------------------------------------------------------------------------------------------------------------------------------------------------------------------------------------------------------------------------------------------------------------------------------------------------------------------------------------------------------------------------------------------------------------------------------------------------|------------------------------------------------------------------------------------------------------------------------------------------------------------------------------------------------------|--------------------------------------------------------------------------------------------------------------------------------------------------------------------------------|--------------------------------------------------------------------------------------------------------------------------------------|--------------------------------------------------------------------------------------------------------------------------------------------------------------------------------------------------------------------------------------------------------------------------------------------------------------------------|-----|
|                   |                                                                                                                                                                                                                                                                                                                                                                                                                                                                                                                                                                                                                                                                                                                                                                                                                                                                                           | Funding data for MSF in 2019 have unallocated or unspecified regions.                                                                                                                                                                                                                                                                                                                                                                                                                                    |                                                                                                                                                                                                      |                                                                                                                                                                                |                                                                                                                                      |                                                                                                                                                                                                                                                                                                                          |     |
| PATH              | <p>"At PATH, we are a global team of innovators working to <b>accelerate health equity</b> so all people and communities can thrive. We advise and partner with public institutions, businesses, grassroots groups, and investors to solve the world's most pressing health challenges." (<a href="#">PATH About Us</a>)</p> <p>"2019 Achievements</p> <ul style="list-style-type: none"> <li>Controlling and eliminating <b>malaria</b></li> <li>Differentiating services for <b>HIV</b> patients</li> <li>Reimagining <b>primary health care</b></li> <li>Creating <b>innovative devices</b> and diagnostics</li> <li>Maximizing impact through <b>policy</b></li> <li>Advancing <b>essential medicines</b></li> <li>Reducing the cost of <b>sanitation</b> and cleaning</li> <li>Expanding access to <b>contraception</b>"</li> </ul> <p>(<a href="#">PATH Annual Report 2019</a>)</p> | <p><b>Health Focus Area</b><br/>Of the \$303 million 2019 budget, 48% was allocated to global health programs, 37% to essential medicines, 11% to technology and innovation, 3.5% to other.</p> <p><b>Region</b><br/>Funding data for PATH in 2019 have unallocated or unspecified regions.</p>                                                                                                                                                                                                          | <p><b>Topics from 2016-2020 tweets (no order)</b></p> <p>Access<br/>Africa<br/>Breastfeeding<br/>Cancer<br/>Children<br/>Ebola<br/>Innovation<br/>Malaria<br/>Pneumonia<br/>Vaccines</p>             | <p>Accelerating health equity</p> <p>Areas:<br/>Malaria, HIV/AIDS, primary health care, health innovations, health policy, essential medicines, sanitation, contraceptives</p> | <p>Malaria, vaccines, and innovations are consistent across DAH data and tweets.</p>                                                 | <p>Malaria, vaccines, and innovations are consistent across stated and revealed preferences.</p> <p>To maximize benefits of their pre-determined goal of "accelerating health equity", PATH prioritizes malaria, vaccines, and health innovations.</p>                                                                   | Yes |
| Save the Children | <p>"For 100 years, we've been giving <b>children</b> in the U.S. and around the world a <b>healthy start in life, the opportunity to learn and protection from harm</b>. When crisis strikes, we are always among the first to respond and the last to leave. We do whatever it takes to save children, transforming their lives and the future we share." (<a href="#">Save the Children About Us</a>)</p> <p><b>Focus Areas</b></p> <ul style="list-style-type: none"> <li>Health and Nutrition</li> <li>Education</li> <li>Hunger and Livelihoods</li> <li>Public Policy and Advocacy</li> <li>HIV/AIDS</li> <li>Child Protection and Rights Governance</li> </ul> <p>(<a href="#">Save the Children Annual Report 2019</a>)</p>                                                                                                                                                       | <p><b>Health Focus Area</b><br/>In 2019, Save the Children had a budget of \$836 million.</p> <ul style="list-style-type: none"> <li>Health &amp; Nutrition (38%)</li> <li>Education (19%)</li> <li>Hunger &amp; Livelihoods (13%)</li> <li>Public Policy &amp; Advocacy (11%)</li> <li>HIV/AIDS (7%)</li> <li>Child Protection &amp; Rights Governance (4%)</li> <li>Other (8%)</li> </ul> <p><b>Region</b><br/>Funding data for Save the Children in 2019 have unallocated or unspecified regions.</p> | <p><b>Topics from 2016-2020 tweets (no order)</b></p> <p>Africa<br/>Children<br/>Donations<br/>Education<br/>Food Security<br/>Humanitarian Aid<br/>Pneumonia<br/>Refugees<br/>Schools<br/>Water</p> | <p>Health related: "giving children a healthy start", "protection from harm"</p>                                                                                               | <p>Child health, nutrition, and food security are consistent across DAH data and tweets.</p>                                         | <p>Child health, nutrition, and food security are consistent across stated and revealed priorities.</p> <p>To maximize benefits of their pre-determined global health goals of "giving children a healthy start and protection from harm", Save the Children prioritizes child health, nutrition, and food security.</p> | Yes |
| Oxfam             | <p>"Oxfam is a global organization working to <b>end the injustice of poverty</b>. We help people <b>build better futures for themselves, hold the powerful accountable, and save lives in disasters</b>." (<a href="#">About Oxfam</a>)</p> <p>"Across Yemen, Puerto Rico, Bangladesh, Syria, Central America, and Mozambique, among many other places, our work is delivering tangible, measurable impact: providing lifesaving aid, partnering with local organizations to achieve long-term solutions, and using</p>                                                                                                                                                                                                                                                                                                                                                                  | <p><b>Health Focus Area</b><br/>Of the \$88 million 2019 budget, 36% was allocated to emergency response and preparedness, 28% to overcoming poverty, 28% to social justice campaigns, 8% to public education.</p> <p><b>Region</b><br/>Of the budget spent on emergency response and preparedness, 40% was allocated to Africa, 24% to Latin</p>                                                                                                                                                        | <p><b>Topics from 2016-2020 tweets (no order)</b></p> <p>Africa<br/>Climate Change<br/>Ebola<br/>Food Security<br/>Humanitarian Aid<br/>Malaria<br/>Pneumonia<br/>Refugees<br/>Water<br/>Women</p>   | <p>Health related: "help people build better futures for themselves," "save lives in disasters"</p>                                                                            | <p>Emergency response (humanitarian aid, Ebola, food security, and infectious disease) is consistent across DAH data and tweets.</p> | <p>Emergency response (humanitarian aid, Ebola, food security, and infectious disease) is consistent across stated and revealed preferences.</p> <p>To maximize benefits of their pre-determined global health goals of "helping</p>                                                                                     | Yes |

|                      |                                                                                                                                                                                                                                                                                                                                                                                                                                                                                                                                                                                                                                                                                                                                                                                                                                                                                                                                                                                                                                                                                                                                                                                                                                                                                                                                                                                                                                                                                                                                                                                              |                                                                                                                                                                                                                                                                                                                                                                                                                                                                                                                                                                                                                                                                                                                                                                              |                                                                                                                                                                                                                                                                                                                                                                                                                                                                                                                                                                                                                                                                                                                                                                                                                                                                                                                                                                                                                                                                                                                                                                                         |                                                                                                                            |                                                                                                                                                                                                                                                                                                                                                                                                                                                                                                |                                                                                                                                                                                            |  |
|----------------------|----------------------------------------------------------------------------------------------------------------------------------------------------------------------------------------------------------------------------------------------------------------------------------------------------------------------------------------------------------------------------------------------------------------------------------------------------------------------------------------------------------------------------------------------------------------------------------------------------------------------------------------------------------------------------------------------------------------------------------------------------------------------------------------------------------------------------------------------------------------------------------------------------------------------------------------------------------------------------------------------------------------------------------------------------------------------------------------------------------------------------------------------------------------------------------------------------------------------------------------------------------------------------------------------------------------------------------------------------------------------------------------------------------------------------------------------------------------------------------------------------------------------------------------------------------------------------------------------|------------------------------------------------------------------------------------------------------------------------------------------------------------------------------------------------------------------------------------------------------------------------------------------------------------------------------------------------------------------------------------------------------------------------------------------------------------------------------------------------------------------------------------------------------------------------------------------------------------------------------------------------------------------------------------------------------------------------------------------------------------------------------|-----------------------------------------------------------------------------------------------------------------------------------------------------------------------------------------------------------------------------------------------------------------------------------------------------------------------------------------------------------------------------------------------------------------------------------------------------------------------------------------------------------------------------------------------------------------------------------------------------------------------------------------------------------------------------------------------------------------------------------------------------------------------------------------------------------------------------------------------------------------------------------------------------------------------------------------------------------------------------------------------------------------------------------------------------------------------------------------------------------------------------------------------------------------------------------------|----------------------------------------------------------------------------------------------------------------------------|------------------------------------------------------------------------------------------------------------------------------------------------------------------------------------------------------------------------------------------------------------------------------------------------------------------------------------------------------------------------------------------------------------------------------------------------------------------------------------------------|--------------------------------------------------------------------------------------------------------------------------------------------------------------------------------------------|--|
|                      | <p>our strong policy voice to advocate for change.</p> <p><b>Program Services</b></p> <ul style="list-style-type: none"> <li>• Saving Lives: Emergency Response and Preparedness</li> <li>• Programs to overcome poverty</li> <li>• Campaigning for social justice</li> <li>• Public education”</li> </ul> <p><a href="#">(Oxfam Annual Report 2019)</a></p>                                                                                                                                                                                                                                                                                                                                                                                                                                                                                                                                                                                                                                                                                                                                                                                                                                                                                                                                                                                                                                                                                                                                                                                                                                 | <p>America and the Caribbean, and 13% to Asia and the Pacific</p>                                                                                                                                                                                                                                                                                                                                                                                                                                                                                                                                                                                                                                                                                                            |                                                                                                                                                                                                                                                                                                                                                                                                                                                                                                                                                                                                                                                                                                                                                                                                                                                                                                                                                                                                                                                                                                                                                                                         |                                                                                                                            |                                                                                                                                                                                                                                                                                                                                                                                                                                                                                                | <p>people build better futures for themselves” and “saving lives in disasters”, Oxfam prioritizes emergency response, humanitarian aid, Ebola, food security, and infectious diseases.</p> |  |
| Global health system | <p><b>WHO constitution (1948):</b> “Health for All” and the right to the highest attainable standard of health.</p> <p><b>Declaration of Alma-Ata (1978):</b> universal access to primary health care.</p> <p><b>MDGs (2000):</b> reduce child mortality (4), improve maternal health (5), combat HIV/AIDS and other diseases (6)</p> <p><b>SDGs (2015) [Relevant to study’s time period]:</b> good health and well-being (3)</p> <ul style="list-style-type: none"> <li>• By 2030, reduce the global <b>maternal mortality</b> ratio to less than 70 per 100,000 live births (3.1)</li> <li>• By 2030, end <b>preventable deaths of newborns and children</b> under 5 years of age, with all countries aiming to reduce neonatal mortality to at least as low as 12 per 1,000 live births and under-5 mortality to at least as low as 25 per 1,000 live births (3.2)</li> <li>• By 2030, end the epidemics of <b>AIDS, tuberculosis, malaria and neglected tropical diseases</b> and combat <b>hepatitis</b>, water-borne diseases and other <b>communicable diseases</b> (3.3)</li> <li>• By 2030, reduce by one third premature mortality from <b>non-communicable diseases</b> through prevention and treatment and promote <b>mental health and well-being</b> (3.4)</li> <li>• Strengthen the prevention and treatment of <b>substance abuse</b>, including narcotic drug abuse and harmful use of alcohol (3.5)</li> <li>• By 2020, halve the number of global deaths and injuries from <b>road traffic accidents</b> (3.6)</li> <li>• By 2030, ensure universal access to</li> </ul> | <p><u>Health Focus Areas</u></p> <p>Of the \$41 billion DAH transferred across all global health actors in 2019, 24% was allocated to <b>HIV/AIDS</b>, 21% to <b>newborn and child health</b>, 14% to <b>health system strengthening</b>, 12% to <b>reproductive and maternal health</b>, 6% to other infectious diseases, 6% to malaria, 4% to tuberculosis, and 2% to non-communicable diseases.</p> <p><u>Region</u></p> <p>Funding data in 2019 have unallocated or unspecified regions.</p> <p>In 2017, 33% of all DAH funding was allocated to <b>sub-Saharan Africa</b>, 5% to Southeast Asia, 5% to South Asia, 4% to North Africa and the Middle East, 3% to Latin America and the Caribbean, 2% to Europe and Central Asia, 15% globally, and 32% unallocated.</p> | <p><u>Most common topics from 2016-2020 across 20 key actors</u> (number in parenthesis indicates count of actors that had the topic as a priority from 2016-2020 tweets)</p> <ol style="list-style-type: none"> <li>1. Africa (17),</li> <li>2. Children (15),</li> <li>3. HIV/AIDS (11),</li> <li>4. Women (10),</li> <li>5. Ebola (9),</li> <li>6. Water (9),</li> <li>7. Food security (7),</li> <li>8. Humanitarian aid (7),</li> <li>9. Malaria (7),</li> <li>10. Education (6),</li> <li>11. Climate change (5),</li> <li>12. Pneumonia (5),</li> <li>13. Breastfeeding (4),</li> <li>14. Cancer (4),</li> <li>15. Measles (4),</li> <li>16. Polio (4),</li> <li>17. Tuberculosis (4),</li> <li>18. Vaccines (4),</li> <li>19. Access (3),</li> <li>20. Agriculture (3),</li> <li>21. Cholera (3),</li> <li>22. Human Rights (3),</li> <li>23. Mothers (3),</li> <li>24. Refugees (3),</li> <li>25. Treatment (3),</li> <li>26. Violence (3),</li> <li>27. FGM (2),</li> <li>28. Hepatitis (2),</li> <li>29. Influenza (2),</li> <li>30. Innovation (2),</li> <li>31. Poverty (2),</li> <li>32. Prevention (2),</li> <li>33. Sanitation (2),</li> <li>34. Testing (2)</li> </ol> | <p>Health for all and the right to highest attainable standard of health.</p> <p>9 important target areas under SDG 3.</p> | <p>HIV/AIDS, child and maternal health, and infectious diseases are consistent across DAH data and tweets.</p> <p>To maximize benefits of the pre-determined goal of “health for all” and “SDG3: good health and well-being”, the global health system prioritizes 3 of the 9 target areas of SDG 3: HIV/AIDS, child and maternal health, and infectious diseases.</p> <p><b>Note:</b> These benefit-maximizing priorities are the same top priorities of the three funding organizations.</p> | Yes                                                                                                                                                                                        |  |

1  
2  
3  
4  
5  
6  
7  
8  
9  
10  
11  
12  
13  
14  
15  
16  
17  
18  
19  
20  
21  
22  
23  
24  
25  
26  
27  
28  
29  
30  
31  
32  
33  
34  
35  
36  
37  
38  
39  
40  
41  
42  
43  
44  
45  
46  
47  
48  
49  
50  
51  
52  
53  
54  
55  
56  
57  
58  
59  
60

|  |                                                                                                                                                                                                                                                                                                                                                                                                                                                                                                                                                                                                                                                                               |  |  |  |  |  |  |
|--|-------------------------------------------------------------------------------------------------------------------------------------------------------------------------------------------------------------------------------------------------------------------------------------------------------------------------------------------------------------------------------------------------------------------------------------------------------------------------------------------------------------------------------------------------------------------------------------------------------------------------------------------------------------------------------|--|--|--|--|--|--|
|  | <p><b>sexual and reproductive health-care services</b>, including for family planning, information and education, and the integration of reproductive health into national strategies and programmes (3.7)</p> <ul style="list-style-type: none"> <li>• Achieve <b>universal health coverage</b>, including financial risk protection, access to quality essential health-care services and access to safe, effective, quality and affordable essential medicines and vaccines for all (3.8)</li> <li>• By 2030, substantially reduce the number of <b>deaths and illnesses from hazardous chemicals and air, water and soil pollution and contamination</b> (3.9)</li> </ul> |  |  |  |  |  |  |
|--|-------------------------------------------------------------------------------------------------------------------------------------------------------------------------------------------------------------------------------------------------------------------------------------------------------------------------------------------------------------------------------------------------------------------------------------------------------------------------------------------------------------------------------------------------------------------------------------------------------------------------------------------------------------------------------|--|--|--|--|--|--|

**Supplementary Table 2. Breakdown of Collected Tweets by Actor and Month.** Total tweets and average tweets per month for each of the 20 global health actors.

| Global Health Actor                                        | Total Tweets  | Average Tweets per Month |
|------------------------------------------------------------|---------------|--------------------------|
| World Health Organization                                  | 10,827        | 722                      |
| Oxfam International                                        | 5,694         | 380                      |
| Doctors Without Borders (MSF)                              | 5,553         | 370                      |
| UN Children's Fund (UNICEF)                                | 5,395         | 360                      |
| World Bank                                                 | 5,365         | 358                      |
| UN Development Programme (UNDP)                            | 4,912         | 327                      |
| UN Population Fund (UNFPA)                                 | 3,908         | 261                      |
| UK Department of International Development                 | 3,823         | 255                      |
| Centers for Disease Control and Prevention (CDC)           | 3,701         | 247                      |
| United States Agency for International Development (USAID) | 3,604         | 240                      |
| Food and Agriculture Organization (FAO)                    | 3,263         | 218                      |
| Save the Children                                          | 3,121         | 208                      |
| Gavi, the Vaccine Alliance                                 | 2,739         | 183                      |
| National Institutes of Health (NIH)                        | 2,664         | 178                      |
| Joint UN Programme on HIV/AIDS (UNAIDS)                    | 2,214         | 148                      |
| PATH                                                       | 1,954         | 130                      |
| Global Fund                                                | 1,727         | 115                      |
| European Centre for Disease Prevention and Control (ECDC)  | 1,311         | 87                       |
| Gates Foundation                                           | 1,249         | 83                       |
| Unitaid                                                    | 1,217         | 81                       |
| <b>Total</b>                                               | <b>74,241</b> | <b>4,949</b>             |



**Supplementary Table 3. Breakdown of Collected Tweets by Year and Month** Tweets per month and per year for all the tweets collected.

|              | Tweets per Month | Tweets per Year |
|--------------|------------------|-----------------|
| 2016         |                  | 5,973           |
| November     | 5,973            |                 |
| 2017         |                  | 21,193          |
| February     | 4,474            |                 |
| May          | 5,582            |                 |
| August       | 5,103            |                 |
| November     | 6,034            |                 |
| 2018         |                  | 18,562          |
| February     | 4,145            |                 |
| May          | 4,965            |                 |
| August       | 4,205            |                 |
| November     | 5,247            |                 |
| 2019         |                  | 17,884          |
| February     | 4,500            |                 |
| May          | 4,886            |                 |
| August       | 3,987            |                 |
| November     | 4,511            |                 |
| 2020         |                  | 10,629          |
| February     | 4,446            |                 |
| May          | 6,183            |                 |
| <b>Total</b> | <b>74,241</b>    | <b>74,241</b>   |

**Supplementary Table 4. Priority Similarity Matrix** Scores are generated by comparing the list of 10 health priorities of actor A with that of actor B and the number of matching priorities is counted. Topic similarity scores range from 0-10.

|                   | USA | UK | BMGF | WHO | World Bank | UNAIDS | UNFPA | UNICEF | UNITAID | GAVI | Oxfam | Global Fund | CDC | EU CDC | NIH | FAO | UNDP | MSF | PATH | Save the Children |
|-------------------|-----|----|------|-----|------------|--------|-------|--------|---------|------|-------|-------------|-----|--------|-----|-----|------|-----|------|-------------------|
| USA               |     | 7  | 6    | 5   | 6          | 3      | 4     | 4      | 2       | 2    | 5     | 4           | 3   | 1      | 2   | 3   | 7    | 4   | 2    | 6                 |
| UK                | 7   |    | 4    | 4   | 6          | 2      | 3     | 5      | 2       | 3    | 5     | 4           | 2   | 2      | 2   | 4   | 6    | 5   | 3    | 6                 |
| BMGF              | 6   | 4  |      | 8   | 4          | 3      | 3     | 4      | 3       | 3    | 3     | 6           | 2   | 1      | 2   | 1   | 6    | 3   | 4    | 3                 |
| WHO               | 5   | 4  | 8    |     | 3          | 3      | 3     | 4      | 3       | 5    | 4     | 7           | 3   | 3      | 2   | 1   | 5    | 4   | 5    | 2                 |
| World Bank        | 6   | 6  | 4    | 3   |            | 2      | 4     | 4      | 1       | 3    | 6     | 3           | 3   | 0      | 1   | 5   | 6    | 3   | 2    | 5                 |
| UNAIDS            | 3   | 2  | 3    | 3   | 2          |        | 3     | 2      | 4       | 1    | 2     | 3           | 2   | 1      | 2   | 1   | 3    | 3   | 3    | 1                 |
| UNFPA             | 4   | 3  | 3    | 3   | 4          | 3      |       | 4      | 1       | 2    | 3     | 3           | 2   | 0      | 1   | 1   | 4    | 4   | 2    | 3                 |
| UNICEF            | 4   | 5  | 4    | 4   | 4          | 2      | 4     |        | 1       | 3    | 4     | 3           | 2   | 1      | 1   | 3   | 5    | 4   | 4    | 4                 |
| UNITAID           | 2   | 2  | 3    | 3   | 1          | 4      | 1     | 1      |         | 3    | 1     | 4           | 2   | 3      | 2   | 0   | 3    | 4   | 5    | 1                 |
| GAVI              | 2   | 3  | 3    | 5   | 3          | 1      | 2     | 3      | 3       |      | 3     | 6           | 3   | 2      | 2   | 1   | 2    | 4   | 5    | 2                 |
| Oxfam             | 5   | 5  | 3    | 4   | 6          | 2      | 3     | 4      | 1       | 3    |       | 5           | 2   | 1      | 1   | 4   | 6    | 4   | 3    | 5                 |
| Global Fund       | 4   | 4  | 6    | 7   | 3          | 3      | 3     | 3      | 4       | 6    | 5     |             | 2   | 3      | 2   | 1   | 5    | 6   | 4    | 2                 |
| CDC               | 3   | 2  | 2    | 3   | 3          | 2      | 2     | 2      | 2       | 3    | 2     | 2           |     | 2      | 0   | 1   | 3    | 1   | 2    | 2                 |
| EU CDC            | 1   | 2  | 1    | 3   | 0          | 1      | 0     | 1      | 3       | 2    | 1     | 3           | 2   |        | 1   | 0   | 1    | 3   | 1    | 0                 |
| NIH               | 2   | 2  | 2    | 2   | 1          | 2      | 1     | 1      | 2       | 2    | 1     | 2           | 0   | 1      |     | 1   | 2    | 2   | 2    | 1                 |
| FAO               | 3   | 4  | 1    | 1   | 5          | 1      | 1     | 3      | 0       | 1    | 4     | 1           | 1   | 0      | 1   |     | 4    | 1   | 1    | 3                 |
| UNDP              | 7   | 6  | 6    | 5   | 6          | 3      | 4     | 5      | 3       | 2    | 6     | 5           | 3   | 1      | 2   | 4   |      | 3   | 3    | 5                 |
| MSF               | 4   | 5  | 3    | 4   | 3          | 3      | 4     | 4      | 4       | 4    | 4     | 6           | 1   | 3      | 2   | 1   | 3    |     | 3    | 4                 |
| PATH              | 2   | 3  | 4    | 5   | 2          | 3      | 2     | 4      | 5       | 5    | 3     | 4           | 2   | 1      | 2   | 1   | 3    | 3   |      | 3                 |
| Save the Children | 6   | 6  | 3    | 2   | 5          | 1      | 3     | 4      | 1       | 2    | 5     | 2           | 2   | 0      | 1   | 3   | 5    | 4   | 3    |                   |

**Supplementary Table 5. Types of Power.** A summary of the four types of power as presented by Barnett and Duvall (2005) with examples in global health.

| Power Type          | Relational specificity | Power works through...           | Definition according to Barnett & Duvall (2005)                                                                          | Global Health Example                                                                                                                                            |
|---------------------|------------------------|----------------------------------|--------------------------------------------------------------------------------------------------------------------------|------------------------------------------------------------------------------------------------------------------------------------------------------------------|
| Compulsory Power    | Direct                 | Interactions of specific actors  | "Direct control of one actor over the conditions of existence or the actions of another." (p. 48)                        | Donor countries dictate the conditions in low and middle-income countries (LMICs) through dictating requirements in development aid.                             |
| Institutional Power | Diffuse                | Interactions of specific actors  | "Control actors exercise indirectly over others through diffuse relations of interactions." (p. 43)                      | High-income countries control funding allocations for LMICs through institutional power via their contributions to the WHO and other multilateral organizations. |
| Structural Power    | Direct                 | Social relations of constitution | "Constitution of subjects' capacities in direct structural relation to one another." (p. 43)                             | The structural and historical disempowerment of indigenous populations have resulted in their disproportionate outcomes in health.                               |
| Productive Power    | Diffuse                | Social relations of constitution | "Power [that] works through diffuse constitutive relations to produce the situated social capacities of actors." (p. 48) | High-income countries direct what research institutions prioritize and study, and ultimately determine what health issues are addressed.                         |

## SUPPLEMENTARY MATERIALS

### Materials and Methods

#### *Rationale for choosing the 20 global health actors*

1. Hoffman & Cole (2018), Frenk & Moon (2013), and Szlezak et al. (2010) were the basis for the 20 global health actors in this study.[4, 15, 16]
  - a. Hoffman & Cole (2018) used the related search function in Google in order to systematically map global health actors – 20 global health actors were identified as most important based on their methodology and was validated by 9 identified global health experts.
  - b. Frenk & Moon (2013) identifies 9 primary types of actors in global health with 24 examples in their study on pluralism and other challenges in global health.
  - c. Zlezak et al. (2010) describes their 8 identified types of actors in global health as a partnership in their article that argues for the norms and roles of each actor in the transition of global health.
2. The identified global health actors across the 3 studies were compared, and the 20 actors that were identified most important by all 3 studies were chosen.

#### *Collection of tweets*

1. Twitter is one of the social media platforms where global health actors actively and consistently share their work, research, and news to the general global public.
2. Using the [Twitter Application Programming Interface \(API\)](#), tweets from of the 20 global health actors were collected from November 2016 to May 2020 in three month intervals.
  - a. All the tweets of each of the 20 global health actors were collected for the following 15 months:
    - i. 2016: November
    - ii. 2017: February, May, August, November
    - iii. 2018: February, May, August, November
    - iv. 2019: February, May, August, November
    - v. 2020: February, May
  - b. November 2019 is the identified beginning of the COVID-19 outbreak.
  - c. This scope allows an analysis of tweets of global health actors 3 years leading up to the COVID-19 outbreak and 6-months into the pandemic.
3. Three month intervals were chosen with the assumption that a variance in the issues, topics, and themes that global health actors tweet can be seen in three month intervals while allowing for efficient usage of the request limit from the Twitter API.

#### *Topic modelling*

1. Topic Modeling was conducted to identify the 10 most tweeted global health issues/topics by each actor in each of the 15 months in the study.

- 1
  - 2
  - 3
  - 4
  - 5
  - 6
  - 7
  - 8
  - 9
  - 10
  - 11
  - 12
  - 13
  - 14
  - 15
  - 16
  - 17
  - 18
  - 19
  - 20
  - 21
  - 22
  - 23
  - 24
  - 25
  - 26
  - 27
  - 28
  - 29
  - 30
  - 31
  - 32
  - 33
  - 34
  - 35
  - 36
  - 37
  - 38
  - 39
  - 40
  - 41
  - 42
  - 43
  - 44
  - 45
  - 46
  - 47
  - 48
  - 49
  - 50
  - 51
  - 52
  - 53
  - 54
  - 55
  - 56
  - 57
  - 58
  - 59
  - 60
2. The 10 most tweeted global health issues/topics were used to describe the set of issues/problems a specific global health actor prioritizes in a given month.
  3. [Latent Dirichlet Allocation \(LDA\)](#) was used in topic modeling.
  4. Topic modeling answers the questions:
    - a. “What are the most prioritized issues among the identified global health actors from 2016 to 2020?”
    - b. “When did global health actors have pandemic preparedness as a priority in the three years leading up to the COVID-19 pandemic?”
    - c. “What are the trends in prioritization of global health issues between and among different types of global health actors?”

#### *FAQs about how LDA was used in this study*

- What did the authors do with tweets that mentioned both “breastfeeding” and “mothers”? Do the authors believe that the revealed priorities of an organization that references both breastfeeding and mothers are substantively different than those of an organization that just references breastfeeding, and so on?
  - For context, LDA topic modeling is a form of “unsupervised machine learning” where the data used is “unlabeled.” This means that when we ran the algorithm, we did not define what statements will be categorized as “breastfeeding” and what will be categorized as “mothers.” We also did not define what words would fall under any other topics that were generated by the model. The only input from us is was how many topics we want the LDA algorithm to categorize the corpus of text. In our analysis, we generated 10 topics for each of the 20 actors. The LDA algorithm generates topics based on a generative probabilistic model that assumes each topic is a mixture over an underlying set of words, and each corpus of text is a mixture of sets of topic probabilities. In a nutshell, the algorithm analyzes all the words in all the tweets of a specific actor. It then generates probabilities of each unique word appearing with other words in a certain tweet or sentence. Topics are then generated by the model based on these sets of probabilities.
- Some topics are quite general (e.g., “Poverty”, “Treatment”, “News”), while others are more specific (“Fisheries”, “Hepatitis”, “Veterans”). In cases where one topic could be subsumed by another (e.g., “Schools” could be subsumed by “Education”), how did the authors disaggregate these?
  - We did not have any input in categorizing any of the topics generated. The topics generated are based on the words and language used by each respective actor in their tweets. The algorithm uses the words/language used by the actor in their tweets to generate topics. We did not make any other edits to the topics after they were generated.

#### *Code for collecting tweets*

```
# CREDENTIALS
import yaml

config = dict(
    search_tweets_api = dict(
        account_type = 'premium',
        endpoint = 'https://api.twitter.com/1.1/tweets/search/fullarchive/datacollection.json',
```

```

1
2
3         consumer_key = 'xxxxxxxxxxxxxxxxxxxxxxxxxxxxxxxx',
4         consumer_secret = 'xxxxxxxxxxxxxxxxxxxxxxxxxxxxxxxx'
5     )
6
7 with open('twitter_keys_fullarchive.yaml', 'w') as config_file:
8     yaml.dump(config, config_file, default_flow_style=False)
9
10 # LOAD CREDENTIALS
11 from searchtweets import load_credentials
12
13 premium_search_args = load_credentials("twitter_keys_fullarchive.yaml",
14                                     yaml_key="search_tweets_api",
15                                     env_overwrite=False)
16
17 print(premium_search_args)
18
19 # QUERY RULE SET UP
20 from searchtweets import gen_rule_payload
21
22 rule = gen_rule_payload("from:username",
23                       results_per_call=500,
24                       from_date="2020-02-01",
25                       to_date="2020-03-01"
26                       )
27
28 # WRITE TO JSONL config_file
29 import json
30
31 with open('tweets_feb_2020.jsonl', 'a', encoding='utf-8') as f:
32     n = 0
33     for tweet in rs.stream():
34         n += 1
35         if n % 10 == 0:
36             print('{0}: {1}'.format(str(n), tweet['created_at']))
37             json.dump(tweet, f)
38             f.write('\n')
39     print('done')
40
41 # REPEAT FOR OTHER USERS AND MONTHS

```

### *Code for topic modelling*

```

32
33 # Importing modules
34
35 import pandas as pd
36
37 # Read data into tweets_df
38 tweets_df = pd.read_csv('tweets_nov2016-may2020.csv')
39
40 # Print head
41 tweets_df.head()
42
43 # Remove the columns
44 tweets_df = tweets_df[["username", "user_id", "created_at", "tweet"]]
45
46 # Print out the first rows of tweets_df
47 tweets_df.head()
48
49 # Create dataframe for each month in analysis
50 tweets_feb = tweets.loc[tweets.created_at.str.contains("Feb")]
51 tweets_feb_17 = tweets_feb.loc[tweets_feb.created_at.str.contains("2017")]
52 tweets_feb_18 = tweets_feb.loc[tweets_feb.created_at.str.contains("2018")]
53 tweets_feb_19 = tweets_feb.loc[tweets_feb.created_at.str.contains("2019")]
54 tweets_feb_20 = tweets_feb.loc[tweets_feb.created_at.str.contains("2020")]
55
56 tweets_may = tweets.loc[tweets.created_at.str.contains("May")]
57 tweets_may_17 = tweets_may.loc[tweets_may.created_at.str.contains("2017")]
58 tweets_may_18 = tweets_may.loc[tweets_may.created_at.str.contains("2018")]
59 tweets_may_19 = tweets_may.loc[tweets_may.created_at.str.contains("2019")]
60 tweets_may_20 = tweets_may.loc[tweets_may.created_at.str.contains("2020")]
61
62 tweets_aug = tweets.loc[tweets.created_at.str.contains("Aug")]
63 tweets_aug_17 = tweets_aug.loc[tweets_aug.created_at.str.contains("2017")]
64 tweets_aug_18 = tweets_aug.loc[tweets_aug.created_at.str.contains("2018")]
65 tweets_aug_19 = tweets_aug.loc[tweets_aug.created_at.str.contains("2019")]

```

```

1
2
3 tweets_nov = tweets.loc[tweets.created_at.str.contains("Nov")]
4 tweets_nov_16 = tweets_nov.loc[tweets_nov.created_at.str.contains("2016")]
5 tweets_nov_17 = tweets_nov.loc[tweets_nov.created_at.str.contains("2017")]
6 tweets_nov_18 = tweets_nov.loc[tweets_nov.created_at.str.contains("2018")]
7 tweets_nov_19 = tweets_nov.loc[tweets_nov.created_at.str.contains("2019")]
8
9 # Helper function
10 def plot_10_most_common_words(count_data, count_vectorizer):
11     import matplotlib.pyplot as plt
12     words = count_vectorizer.get_feature_names()
13     total_counts = np.zeros(len(words))
14     for t in count_data:
15         total_counts+=t.toarray()[0]
16
17     count_dict = (zip(words, total_counts))
18     count_dict = sorted(count_dict, key=lambda x:x[1], reverse=True)[1:23]
19     words = [w[0] for w in count_dict]
20     counts = [w[1] for w in count_dict]
21     x_pos = np.arange(len(words))
22
23     plt.figure(2, figsize=(15, 2))
24     plt.subplot(title=f'10 Most Common Words')
25     sns.set_context("notebook", font_scale=1.25, rc={"lines.linewidth": 2.5})
26     sns.barplot(x_pos, counts, palette='husl')
27     plt.xticks(x_pos, words, rotation=90)
28     plt.xlabel('words')
29     plt.ylabel('counts')
30     plt.show()
31
32 # Import Libraries
33 from sklearn.feature_extraction.text import CountVectorizer
34 import numpy as np
35
36 import matplotlib.pyplot as plt
37 import seaborn as sns
38
39 import re
40 import string
41
42 # Identify top 10 keywords, issues, topics of each actor for a given month
43 tweets = tweets_nov_16[tweets_nov_16["username"] == username]
44 tweets = tweets_df[tweets_df['username'].isin(username)]
45 printable = set(string.printable)
46 tweets['paper_text_processed'] = tweets['tweet'].map(lambda x: re.sub('[,\.\!?\']', '', x))
47 tweets['paper_text_processed'] = tweets['tweet'].map(lambda x: x.encode('ascii','ignore'))
48 exclusionList = ['amp', 'https', 'RT', 'people', 'know', 'living', 'new', '2018', 'latest', 'use', 'week',
49                 'ECDC_EU', 'thank', 'Thank', 'DYK', 'USAID', 'today', 'world', 'million', 'country',
50                 'foreignoffice', 'UK', 'billgates', 'melindagates', '2019', 'des', '33', 'DFID',
51                 '000', 'day', 'like', 'year', 'old', 'live', 'UNITAID', 'PATHtweets', 'PATH', 'para',
52                 'WorldBank', 'LIVE', 'WHOAFRO', 'WHOWPRO', 'WHOSEARO', 'WHOEMRO', 'GlobalFund', 'WHO_Europe', 'la'
53                 ]
54 exclusions = '|'.join(exclusionList)
55 tweets['paper_text_processed'] = tweets['tweet'].map(lambda x: re.sub(exclusions, '', x))
56 tweets['paper_text_processed'] = tweets['paper_text_processed'].map(lambda x: x.lower())
57 tweets['paper_text_processed'].head()
58 sns.set_style('whitegrid')
59 %matplotlib inline
60 count_vectorizer = CountVectorizer(stop_words='english')
61 count_data = count_vectorizer.fit_transform(tweets['paper_text_processed'])
62 import warnings
63 warnings.simplefilter("ignore")
64 plot_10_most_common_words(count_data, count_vectorizer)
65
66 # LDA Topic Modeling
67 import warnings
68 warnings.simplefilter("ignore", DeprecationWarning)
69 # Load the LDA model from sk-learn
70 from sklearn.decomposition import LatentDirichletAllocation as LDA
71
72 # Helper function
73 def print_topics(model, count_vectorizer, n_top_words):
74     words = count_vectorizer.get_feature_names()
75     for topic_idx, topic in enumerate(model.components_):
76         print("\nTopic #{}: {}".format(topic_idx,
77                                       " ".join([words[i]
78                                                 for i in topic.argsort()[::-n_top_words - 1:-1]])))
79
80 # Tweak the two parameters below
81 number_topics = 5

```



```

1
2
3 number_words = 10
4 # Create and fit the LDA model
5 lda = LDA(n_components=number_topics, n_jobs=-1)
6 lda.fit(count_data)
7 # Print the topics found by the LDA model
8 print("Topics found via LDA:")
9 print_topics(lda, count_vectorizer, number_words)

```

### How network maps were analyzed

- **What is network analysis?** Network analysis is an analytic method that has proved to be useful in understanding relational dynamics across actors in global and public health. (Lopreite et al. 2021 and Quisell et al. 2018).
- **Why use network analysis for the study?** Network analysis was conducted to observe the funding relationships between global health actors.
- **What tool was used?** Gephi 0.9.2 was used in constructing and analyzing the network map.
- **How was the network map designed?**
  - The network modelled in the study allows for a graphical visualization of the flows of global health funding in 2019.
  - The network map was designed such that each global health actor is represented by a node and lines or “edges” indicate a flow of funding in global health.
  - The Fruchterman-Reingold algorithm was used in modelling the network map.
    - The algorithm “calculates the optimal layout so that nodes with less strength and less connections are placed further apart, and those with more and/or stronger connections are placed closer to each other.”[18]
    - The thickness of edges represents the amount of funding transferred between actors.
    - The modelled network map can be found and will be discussed in the findings section.

### DAH funding data network analysis summary statistics

| Network Overview     |         |     |   |
|----------------------|---------|-----|---|
| Average Degree       | 25.403  | Run | ? |
| Avg. Weighted Degree | 254.124 | Run | ? |
| Network Diameter     | 4       | Run | ? |
| Graph Density        | 0.113   | Run | ? |
| HITS                 |         | Run | ? |
| Modularity           | 0.093   | Run | ? |
| PageRank             |         | Run | ? |
| Connected Components | 1       | Run | ? |

### Twitter data network analysis summary statistics

| Network Overview     |       |     |   |
|----------------------|-------|-----|---|
| Average Degree       | 2.181 | Run | ? |
| Avg. Weighted Degree | 4.614 | Run | ? |
| Network Diameter     | 3     | Run | ? |
| Graph Density        | 0.027 | Run | ? |
| HITS                 |       | Run | ? |
| Modularity           | 0.172 | Run | ? |
| PageRank             |       | Run | ? |
| Connected Components | 14    | Run | ? |

### DAH funding data network analysis statistics report

| Label                    | indegree | outdegree | Degree | weighted indegree | weighted outdegree | Weighted Degree | Eccentricity | closenesscentrality | harmonicclosenesscentrality | betweenscentrality | modularity_class | strongcompnum |
|--------------------------|----------|-----------|--------|-------------------|--------------------|-----------------|--------------|---------------------|-----------------------------|--------------------|------------------|---------------|
| African Development Bank | 25       | 57        | 82     | 1149              | 1149               | 2298            | 1            | 1.00                | 1.00                        | 54.18              | 1                | 57            |
| Asian Development Bank   | 26       | 48        | 74     | 723               | 723                | 1446            | 3            | 0.42                | 0.53                        | 52.20              | 0                | 160           |
| United Arab Emirates     | 1        | 79        | 80     | 79                | 79                 | 158             | 1            | 1.00                | 1.00                        | 7.28               | 2                | 161           |
| Australia                | 1        | 151       | 152    | 137               | 1021               | 1158            | 2            | 0.85                | 0.91                        | 0.00               | 2                | 175           |
| Austria                  | 1        | 128       | 129    | 112               | 1083               | 1195            | 2            | 0.76                | 0.85                        | 0.00               | 0                | 179           |
| Belgium                  | 1        | 140       | 141    | 123               | 1278               | 1401            | 2            | 0.80                | 0.87                        | 0.00               | 0                | 181           |
| Canada                   | 1        | 163       | 164    | 146               | 1564               | 1710            | 2            | 0.89                | 0.94                        | 0.00               | 2                | 183           |
| Switzerland              | 1        | 138       | 139    | 124               | 866                | 990             | 2            | 0.82                | 0.89                        | 0.00               | 2                | 184           |
| China                    | 39       | 12        | 51     | 251               | 380                | 631             | 2            | 0.52                | 0.53                        | 661.00             | 1                | 160           |
| Germany                  | 1        | 165       | 166    | 147               | 1476               | 1623            | 2            | 0.90                | 0.94                        | 0.00               | 0                | 185           |
| Denmark                  | 1        | 131       | 132    | 115               | 1229               | 1344            | 2            | 0.77                | 0.85                        | 0.00               | 0                | 186           |
| Spain                    | 1        | 152       | 153    | 134               | 1498               | 1632            | 2            | 0.84                | 0.91                        | 0.00               | 0                | 188           |
| Finland                  | 1        | 160       | 161    | 144               | 1210               | 1354            | 2            | 0.88                | 0.93                        | 0.00               | 0                | 189           |
| France                   | 1        | 172       | 173    | 154               | 1466               | 1620            | 2            | 0.92                | 0.96                        | 0.00               | 0                | 192           |
| United Kingdom           | 1        | 168       | 169    | 150               | 1552               | 1702            | 2            | 0.91                | 0.95                        | 0.00               | 0                | 193           |
| Greece                   | 1        | 148       | 149    | 133               | 1031               | 1164            | 2            | 0.83                | 0.90                        | 0.00               | 0                | 194           |
| Ireland                  | 1        | 120       | 121    | 104               | 1081               | 1185            | 2            | 0.74                | 0.82                        | 0.00               | 2                | 195           |
| Italy                    | 1        | 160       | 161    | 143               | 1433               | 1576            | 2            | 0.88                | 0.93                        | 0.00               | 0                | 196           |
| Japan                    | 1        | 169       | 170    | 155               | 1111               | 1266            | 2            | 0.94                | 0.97                        | 0.00               | 2                | 198           |
| Korea                    | 1        | 138       | 139    | 125               | 876                | 1001            | 2            | 0.82                | 0.89                        | 0.00               | 2                | 199           |
| Luxembourg               | 1        | 130       | 131    | 114               | 1124               | 1238            | 2            | 0.77                | 0.85                        | 0.00               | 2                | 200           |

1  
2  
3  
4  
5  
6  
7  
8  
9  
10  
11  
12  
13  
14  
15  
16  
17  
18  
19  
20  
21  
22  
23  
24  
25  
26  
27  
28  
29  
30  
31  
32  
33  
34  
35  
36  
37  
38  
39  
40  
41  
42  
43  
44  
45  
46  
47  
48  
49  
50  
51  
52  
53  
54  
55  
56  
57  
58  
59  
60

|                                                 |    |     |     |      |      |      |   |      |      |        |   |     |
|-------------------------------------------------|----|-----|-----|------|------|------|---|------|------|--------|---|-----|
| Netherlands                                     | 1  | 158 | 159 | 142  | 1380 | 1522 | 2 | 0.87 | 0.93 | 0.00   | 0 | 201 |
| Norway                                          | 1  | 157 | 158 | 138  | 1221 | 1359 | 2 | 0.86 | 0.92 | 0.00   | 2 | 203 |
| New Zealand                                     | 1  | 129 | 130 | 118  | 633  | 751  | 2 | 0.78 | 0.86 | 0.00   | 3 | 204 |
| Portugal                                        | 1  | 73  | 74  | 57   | 885  | 942  | 3 | 0.62 | 0.69 | 0.00   | 0 | 205 |
| Sweden                                          | 1  | 155 | 156 | 139  | 1464 | 1603 | 2 | 0.86 | 0.92 | 0.00   | 0 | 206 |
| United States                                   | 1  | 165 | 166 | 150  | 1390 | 1540 | 2 | 0.92 | 0.96 | 0.00   | 2 | 207 |
| Bill & Melinda Gates Foundation                 | 1  | 162 | 163 | 146  | 1280 | 1426 | 2 | 0.89 | 0.94 | 0.00   | 1 | 208 |
| Coalition for Epidemic Preparedness Innovations | 10 | 1   | 11  | 10   | 10   | 20   | 1 | 1.00 | 1.00 | 0.23   | 1 | 163 |
| European Commission                             | 15 | 148 | 163 | 2184 | 2184 | 4368 | 3 | 0.83 | 0.92 | 53.93  | 0 | 178 |
| European Economic Area                          | 3  | 7   | 10  | 17   | 17   | 34   | 1 | 1.00 | 1.00 | 8.85   | 2 | 202 |
| Gavi                                            | 28 | 118 | 146 | 2024 | 2024 | 4048 | 3 | 0.65 | 0.81 | 110.05 | 1 | 160 |
| Global Fund                                     | 29 | 155 | 184 | 4119 | 4119 | 8238 | 3 | 0.91 | 0.96 | 336.01 | 2 | 160 |
| Inter-American Development Bank                 | 15 | 34  | 49  | 269  | 269  | 538  | 1 | 1.00 | 1.00 | 49.50  | 2 | 119 |
| International NGOs                              | 27 | 151 | 178 | 2323 | 2323 | 4646 | 3 | 0.86 | 0.94 | 198.03 | 2 | 171 |
| US NGOs                                         | 27 | 158 | 185 | 442  | 442  | 884  | 3 | 0.90 | 0.95 | 306.65 | 1 | 174 |
| Pan American Health Organization                | 23 | 44  | 67  | 318  | 318  | 636  | 3 | 0.41 | 0.52 | 28.46  | 2 | 162 |
| UNAIDS                                          | 30 | 133 | 163 | 612  | 612  | 1224 | 3 | 0.73 | 0.87 | 198.05 | 1 | 160 |
| UNFPA                                           | 30 | 141 | 171 | 1630 | 1630 | 3260 | 3 | 0.79 | 0.90 | 226.79 | 0 | 160 |
| UNICEF                                          | 30 | 146 | 176 | 1913 | 1913 | 3826 | 3 | 0.83 | 0.92 | 250.51 | 1 | 160 |
| UNITAID                                         | 9  | 2   | 11  | 14   | 14   | 28   | 1 | 1.00 | 1.00 | 0.28   | 1 | 187 |
| US Foundations                                  | 1  | 164 | 165 | 164  | 164  | 328  | 3 | 0.92 | 0.96 | 23.90  | 1 | 210 |
| World Bank                                      | 21 | 129 | 150 | 1134 | 1134 | 2268 | 3 | 0.71 | 0.85 | 32.25  | 0 | 176 |
| WB_IBRD                                         | 20 | 153 | 173 | 1369 | 1369 | 2738 | 3 | 0.84 | 0.93 | 247.82 | 0 | 169 |
| WB_IDA                                          | 27 | 117 | 144 | 2596 | 2596 | 5192 | 3 | 0.64 | 0.81 | 163.51 | 3 | 160 |
| WHO                                             | 29 | 154 | 183 | 2476 | 2476 | 4952 | 3 | 0.90 | 0.95 | 314.53 | 0 | 160 |
| Corporate Donations                             | 0  | 2   | 2   | 0    | 2    | 2    | 4 | 0.48 | 0.49 | 0.00   | 1 | 211 |
| Debt Repayments                                 | 0  | 2   | 2   | 0    | 173  | 173  | 4 | 0.47 | 0.48 | 0.00   | 3 | 212 |
| Non-OECD DAC Countries                          | 0  | 17  | 17  | 0    | 710  | 710  | 2 | 0.52 | 0.55 | 0.00   | 2 | 213 |
| Other                                           | 0  | 11  | 11  | 0    | 285  | 285  | 3 | 0.52 | 0.53 | 0.00   | 2 | 214 |
| Other OECD DAC Countries                        | 0  | 8   | 8   | 0    | 220  | 220  | 3 | 0.51 | 0.52 | 0.00   | 2 | 215 |
| Private Other                                   | 0  | 14  | 14  | 0    | 941  | 941  | 3 | 0.52 | 0.54 | 0.00   | 1 | 216 |
| Unallocable                                     | 0  | 4   | 4   | 0    | 4    | 4    | 4 | 0.46 | 0.49 | 0.00   | 1 | 217 |
| Afghanistan                                     | 40 | 0   | 40  | 275  | 0    | 275  | 0 | 0.00 | 0.00 | 0.00   | 0 | 134 |
| Albania                                         | 34 | 0   | 34  | 190  | 0    | 190  | 0 | 0.00 | 0.00 | 0.00   | 3 | 122 |
| Algeria                                         | 36 | 0   | 36  | 138  | 0    | 138  | 0 | 0.00 | 0.00 | 0.00   | 2 | 3   |
| Angola                                          | 39 | 0   | 39  | 279  | 0    | 279  | 0 | 0.00 | 0.00 | 0.00   | 1 | 21  |
| Anguilla                                        | 3  | 0   | 3   | 3    | 0    | 3    | 0 | 0.00 | 0.00 | 0.00   | 2 | 170 |
| Antigua and Barbuda                             | 19 | 0   | 19  | 65   | 0    | 65   | 0 | 0.00 | 0.00 | 0.00   | 2 | 87  |
| Argentina                                       | 34 | 0   | 34  | 118  | 0    | 118  | 0 | 0.00 | 0.00 | 0.00   | 2 | 113 |
| Armenia                                         | 36 | 0   | 36  | 218  | 0    | 218  | 0 | 0.00 | 0.00 | 0.00   | 3 | 75  |
| Azerbaijan                                      | 36 | 0   | 36  | 199  | 0    | 199  | 0 | 0.00 | 0.00 | 0.00   | 3 | 74  |
| Bahrain                                         | 1  | 0   | 1   | 1    | 0    | 1    | 0 | 0.00 | 0.00 | 0.00   | 0 | 190 |
| Bangladesh                                      | 39 | 0   | 39  | 271  | 0    | 271  | 0 | 0.00 | 0.00 | 0.00   | 0 | 135 |
| Barbados                                        | 6  | 0   | 6   | 47   | 0    | 47   | 0 | 0.00 | 0.00 | 0.00   | 2 | 107 |

|    |                                  |    |   |    |     |   |     |   |      |      |      |   |     |
|----|----------------------------------|----|---|----|-----|---|-----|---|------|------|------|---|-----|
| 1  |                                  |    |   |    |     |   |     |   |      |      |      |   |     |
| 2  |                                  |    |   |    |     |   |     |   |      |      |      |   |     |
| 3  |                                  |    |   |    |     |   |     |   |      |      |      |   |     |
| 4  | Belarus                          | 30 | 0 | 30 | 119 | 0 | 119 | 0 | 0.00 | 0.00 | 0.00 | 2 | 144 |
| 5  | Belize                           | 33 | 0 | 33 | 119 | 0 | 119 | 0 | 0.00 | 0.00 | 0.00 | 2 | 94  |
| 6  | Benin                            | 39 | 0 | 39 | 273 | 0 | 273 | 0 | 0.00 | 0.00 | 0.00 | 1 | 43  |
| 7  | Bhutan                           | 34 | 0 | 34 | 163 | 0 | 163 | 0 | 0.00 | 0.00 | 0.00 | 3 | 70  |
| 8  | Bolivia                          | 38 | 0 | 38 | 180 | 0 | 180 | 0 | 0.00 | 0.00 | 0.00 | 2 | 108 |
| 9  | Bosnia and Herzegovina           | 35 | 0 | 35 | 182 | 0 | 182 | 0 | 0.00 | 0.00 | 0.00 | 3 | 121 |
| 10 | Botswana                         | 39 | 0 | 39 | 210 | 0 | 210 | 0 | 0.00 | 0.00 | 0.00 | 0 | 18  |
| 11 | Brazil                           | 37 | 0 | 37 | 131 | 0 | 131 | 0 | 0.00 | 0.00 | 0.00 | 2 | 117 |
| 12 | Bulgaria                         | 5  | 0 | 5  | 34  | 0 | 34  | 0 | 0.00 | 0.00 | 0.00 | 2 | 156 |
| 13 | Burkina Faso                     | 39 | 0 | 39 | 280 | 0 | 280 | 0 | 0.00 | 0.00 | 0.00 | 1 | 50  |
| 14 | Burundi                          | 39 | 0 | 39 | 264 | 0 | 264 | 0 | 0.00 | 0.00 | 0.00 | 1 | 19  |
| 15 | Cambodia                         | 37 | 0 | 37 | 266 | 0 | 266 | 0 | 0.00 | 0.00 | 0.00 | 0 | 130 |
| 16 | Cameroon                         | 39 | 0 | 39 | 277 | 0 | 277 | 0 | 0.00 | 0.00 | 0.00 | 1 | 37  |
| 17 | Cape Verde                       | 24 | 0 | 24 | 117 | 0 | 117 | 0 | 0.00 | 0.00 | 0.00 | 3 | 12  |
| 18 | Central African Republic         | 39 | 0 | 39 | 259 | 0 | 259 | 0 | 0.00 | 0.00 | 0.00 | 1 | 14  |
| 19 | Chad                             | 39 | 0 | 39 | 266 | 0 | 266 | 0 | 0.00 | 0.00 | 0.00 | 1 | 29  |
| 20 | Chile                            | 34 | 0 | 34 | 112 | 0 | 112 | 0 | 0.00 | 0.00 | 0.00 | 2 | 102 |
| 21 | Christmas Island                 | 1  | 0 | 1  | 1   | 0 | 1   | 0 | 0.00 | 0.00 | 0.00 | 1 | 209 |
| 22 | Colombia                         | 36 | 0 | 36 | 126 | 0 | 126 | 0 | 0.00 | 0.00 | 0.00 | 2 | 118 |
| 23 | Comoros                          | 39 | 0 | 39 | 223 | 0 | 223 | 0 | 0.00 | 0.00 | 0.00 | 3 | 5   |
| 24 | Congo                            | 39 | 0 | 39 | 249 | 0 | 249 | 0 | 0.00 | 0.00 | 0.00 | 1 | 7   |
| 25 | Cook Islands                     | 9  | 0 | 9  | 49  | 0 | 49  | 0 | 0.00 | 0.00 | 0.00 | 2 | 149 |
| 26 | Costa Rica                       | 35 | 0 | 35 | 131 | 0 | 131 | 0 | 0.00 | 0.00 | 0.00 | 2 | 97  |
| 27 | Cote d'Ivoire                    | 39 | 0 | 39 | 276 | 0 | 276 | 0 | 0.00 | 0.00 | 0.00 | 1 | 20  |
| 28 | Croatia                          | 22 | 0 | 22 | 61  | 0 | 61  | 0 | 0.00 | 0.00 | 0.00 | 2 | 153 |
| 29 | Cuba                             | 36 | 0 | 36 | 166 | 0 | 166 | 0 | 0.00 | 0.00 | 0.00 | 2 | 92  |
| 30 | Czech Republic                   | 2  | 0 | 2  | 2   | 0 | 2   | 0 | 0.00 | 0.00 | 0.00 | 1 | 173 |
| 31 | Democratic Republic of the Congo | 37 | 0 | 37 | 199 | 0 | 199 | 0 | 0.00 | 0.00 | 0.00 | 1 | 46  |
| 32 | Djibouti                         | 39 | 0 | 39 | 247 | 0 | 247 | 0 | 0.00 | 0.00 | 0.00 | 1 | 25  |
| 33 | Dominica                         | 26 | 0 | 26 | 83  | 0 | 83  | 0 | 0.00 | 0.00 | 0.00 | 2 | 89  |
| 34 | Dominican Republic               | 37 | 0 | 37 | 159 | 0 | 159 | 0 | 0.00 | 0.00 | 0.00 | 2 | 112 |
| 35 | Ecuador                          | 37 | 0 | 37 | 128 | 0 | 128 | 0 | 0.00 | 0.00 | 0.00 | 2 | 106 |
| 36 | Egypt                            | 39 | 0 | 39 | 254 | 0 | 254 | 0 | 0.00 | 0.00 | 0.00 | 1 | 35  |
| 37 | El Salvador                      | 37 | 0 | 37 | 161 | 0 | 161 | 0 | 0.00 | 0.00 | 0.00 | 2 | 100 |
| 38 | Equatorial Guinea                | 38 | 0 | 38 | 197 | 0 | 197 | 0 | 0.00 | 0.00 | 0.00 | 3 | 51  |
| 39 | Eritrea                          | 39 | 0 | 39 | 255 | 0 | 255 | 0 | 0.00 | 0.00 | 0.00 | 1 | 16  |
| 40 | Estonia                          | 5  | 0 | 5  | 31  | 0 | 31  | 0 | 0.00 | 0.00 | 0.00 | 2 | 154 |
| 41 | Ethiopia                         | 39 | 0 | 39 | 288 | 0 | 288 | 0 | 0.00 | 0.00 | 0.00 | 1 | 41  |
| 42 | Federated States of Micronesia   | 24 | 0 | 24 | 64  | 0 | 64  | 0 | 0.00 | 0.00 | 0.00 | 2 | 64  |
| 43 | Fiji                             | 26 | 0 | 26 | 81  | 0 | 81  | 0 | 0.00 | 0.00 | 0.00 | 2 | 139 |
| 44 | Gabon                            | 38 | 0 | 38 | 210 | 0 | 210 | 0 | 0.00 | 0.00 | 0.00 | 0 | 47  |
| 45 | Georgia                          | 36 | 0 | 36 | 245 | 0 | 245 | 0 | 0.00 | 0.00 | 0.00 | 3 | 81  |
| 46 | Ghana                            | 39 | 0 | 39 | 284 | 0 | 284 | 0 | 0.00 | 0.00 | 0.00 | 1 | 40  |
| 47 | Global                           | 43 | 0 | 43 | 260 | 0 | 260 | 0 | 0.00 | 0.00 | 0.00 | 1 | 6   |
| 48 |                                  |    |   |    |     |   |     |   |      |      |      |   |     |
| 49 |                                  |    |   |    |     |   |     |   |      |      |      |   |     |
| 50 |                                  |    |   |    |     |   |     |   |      |      |      |   |     |
| 51 |                                  |    |   |    |     |   |     |   |      |      |      |   |     |
| 52 |                                  |    |   |    |     |   |     |   |      |      |      |   |     |
| 53 |                                  |    |   |    |     |   |     |   |      |      |      |   |     |
| 54 |                                  |    |   |    |     |   |     |   |      |      |      |   |     |
| 55 |                                  |    |   |    |     |   |     |   |      |      |      |   |     |
| 56 |                                  |    |   |    |     |   |     |   |      |      |      |   |     |
| 57 |                                  |    |   |    |     |   |     |   |      |      |      |   |     |
| 58 |                                  |    |   |    |     |   |     |   |      |      |      |   |     |
| 59 |                                  |    |   |    |     |   |     |   |      |      |      |   |     |
| 60 |                                  |    |   |    |     |   |     |   |      |      |      |   |     |

|    |                  |    |   |    |     |   |     |   |      |      |      |   |     |
|----|------------------|----|---|----|-----|---|-----|---|------|------|------|---|-----|
| 1  |                  |    |   |    |     |   |     |   |      |      |      |   |     |
| 2  |                  |    |   |    |     |   |     |   |      |      |      |   |     |
| 3  |                  |    |   |    |     |   |     |   |      |      |      |   |     |
| 4  | Grenada          | 30 | 0 | 30 | 85  | 0 | 85  | 0 | 0.00 | 0.00 | 0.00 | 2 | 90  |
| 5  | Guatemala        | 37 | 0 | 37 | 170 | 0 | 170 | 0 | 0.00 | 0.00 | 0.00 | 2 | 115 |
| 6  | Guinea           | 39 | 0 | 39 | 270 | 0 | 270 | 0 | 0.00 | 0.00 | 0.00 | 1 | 31  |
| 7  | Guinea-Bissau    | 39 | 0 | 39 | 259 | 0 | 259 | 0 | 0.00 | 0.00 | 0.00 | 1 | 30  |
| 8  | Guyana           | 34 | 0 | 34 | 156 | 0 | 156 | 0 | 0.00 | 0.00 | 0.00 | 2 | 98  |
| 9  | Haiti            | 38 | 0 | 38 | 234 | 0 | 234 | 0 | 0.00 | 0.00 | 0.00 | 2 | 111 |
| 10 | Honduras         | 38 | 0 | 38 | 186 | 0 | 186 | 0 | 0.00 | 0.00 | 0.00 | 2 | 109 |
| 11 | Hungary          | 3  | 0 | 3  | 3   | 0 | 3   | 0 | 0.00 | 0.00 | 0.00 | 1 | 166 |
| 12 | India            | 39 | 0 | 39 | 274 | 0 | 274 | 0 | 0.00 | 0.00 | 0.00 | 0 | 136 |
| 13 | Indonesia        | 39 | 0 | 39 | 265 | 0 | 265 | 0 | 0.00 | 0.00 | 0.00 | 0 | 132 |
| 14 | Iran             | 36 | 0 | 36 | 142 | 0 | 142 | 0 | 0.00 | 0.00 | 0.00 | 2 | 73  |
| 15 | Iraq             | 37 | 0 | 37 | 195 | 0 | 195 | 0 | 0.00 | 0.00 | 0.00 | 0 | 76  |
| 16 | Jamaica          | 36 | 0 | 36 | 143 | 0 | 143 | 0 | 0.00 | 0.00 | 0.00 | 2 | 103 |
| 17 | Jordan           | 37 | 0 | 37 | 198 | 0 | 198 | 0 | 0.00 | 0.00 | 0.00 | 0 | 80  |
| 18 | Kazakhstan       | 37 | 0 | 37 | 212 | 0 | 212 | 0 | 0.00 | 0.00 | 0.00 | 3 | 78  |
| 19 | Kenya            | 39 | 0 | 39 | 285 | 0 | 285 | 0 | 0.00 | 0.00 | 0.00 | 1 | 48  |
| 20 | Kiribati         | 28 | 0 | 28 | 98  | 0 | 98  | 0 | 0.00 | 0.00 | 0.00 | 2 | 58  |
| 21 | Kosovo           | 32 | 0 | 32 | 142 | 0 | 142 | 0 | 0.00 | 0.00 | 0.00 | 3 | 143 |
| 22 | Kyrgyzstan       | 36 | 0 | 36 | 225 | 0 | 225 | 0 | 0.00 | 0.00 | 0.00 | 3 | 77  |
| 23 | Laos             | 37 | 0 | 37 | 258 | 0 | 258 | 0 | 0.00 | 0.00 | 0.00 | 0 | 127 |
| 24 | Latvia           | 5  | 0 | 5  | 7   | 0 | 7   | 0 | 0.00 | 0.00 | 0.00 | 1 | 157 |
| 25 | Lebanon          | 38 | 0 | 38 | 162 | 0 | 162 | 0 | 0.00 | 0.00 | 0.00 | 0 | 68  |
| 26 | Lesotho          | 39 | 0 | 39 | 253 | 0 | 253 | 0 | 0.00 | 0.00 | 0.00 | 1 | 22  |
| 27 | Liberia          | 39 | 0 | 39 | 269 | 0 | 269 | 0 | 0.00 | 0.00 | 0.00 | 1 | 33  |
| 28 | Libya            | 33 | 0 | 33 | 123 | 0 | 123 | 0 | 0.00 | 0.00 | 0.00 | 0 | 2   |
| 29 | Lithuania        | 5  | 0 | 5  | 7   | 0 | 7   | 0 | 0.00 | 0.00 | 0.00 | 1 | 158 |
| 30 | Macedonia        | 30 | 0 | 30 | 131 | 0 | 131 | 0 | 0.00 | 0.00 | 0.00 | 2 | 145 |
| 31 | Madagascar       | 39 | 0 | 39 | 276 | 0 | 276 | 0 | 0.00 | 0.00 | 0.00 | 1 | 38  |
| 32 | Malawi           | 39 | 0 | 39 | 277 | 0 | 277 | 0 | 0.00 | 0.00 | 0.00 | 1 | 44  |
| 33 | Malaysia         | 31 | 0 | 31 | 132 | 0 | 132 | 0 | 0.00 | 0.00 | 0.00 | 0 | 140 |
| 34 | Maldives         | 32 | 0 | 32 | 110 | 0 | 110 | 0 | 0.00 | 0.00 | 0.00 | 3 | 66  |
| 35 | Mali             | 40 | 0 | 40 | 282 | 0 | 282 | 0 | 0.00 | 0.00 | 0.00 | 1 | 45  |
| 36 | Malta            | 1  | 0 | 1  | 1   | 0 | 1   | 0 | 0.00 | 0.00 | 0.00 | 0 | 180 |
| 37 | Marshall Islands | 21 | 0 | 21 | 76  | 0 | 76  | 0 | 0.00 | 0.00 | 0.00 | 0 | 138 |
| 38 | Mauritania       | 39 | 0 | 39 | 259 | 0 | 259 | 0 | 0.00 | 0.00 | 0.00 | 1 | 34  |
| 39 | Mauritius        | 33 | 0 | 33 | 112 | 0 | 112 | 0 | 0.00 | 0.00 | 0.00 | 2 | 0   |
| 40 | Mayotte          | 1  | 0 | 1  | 1   | 0 | 1   | 0 | 0.00 | 0.00 | 0.00 | 0 | 191 |
| 41 | Mexico           | 37 | 0 | 37 | 161 | 0 | 161 | 0 | 0.00 | 0.00 | 0.00 | 2 | 114 |
| 42 | Moldova          | 33 | 0 | 33 | 185 | 0 | 185 | 0 | 0.00 | 0.00 | 0.00 | 3 | 125 |
| 43 | Mongolia         | 37 | 0 | 37 | 213 | 0 | 213 | 0 | 0.00 | 0.00 | 0.00 | 0 | 124 |
| 44 | Montenegro       | 31 | 0 | 31 | 137 | 0 | 137 | 0 | 0.00 | 0.00 | 0.00 | 3 | 142 |
| 45 | Montserrat       | 25 | 0 | 25 | 72  | 0 | 72  | 0 | 0.00 | 0.00 | 0.00 | 2 | 91  |
| 46 | Morocco          | 39 | 0 | 39 | 218 | 0 | 218 | 0 | 0.00 | 0.00 | 0.00 | 1 | 55  |
| 47 | Mozambique       | 39 | 0 | 39 | 288 | 0 | 288 | 0 | 0.00 | 0.00 | 0.00 | 1 | 36  |
| 48 |                  |    |   |    |     |   |     |   |      |      |      |   |     |
| 49 |                  |    |   |    |     |   |     |   |      |      |      |   |     |
| 50 |                  |    |   |    |     |   |     |   |      |      |      |   |     |
| 51 |                  |    |   |    |     |   |     |   |      |      |      |   |     |
| 52 |                  |    |   |    |     |   |     |   |      |      |      |   |     |
| 53 |                  |    |   |    |     |   |     |   |      |      |      |   |     |
| 54 |                  |    |   |    |     |   |     |   |      |      |      |   |     |
| 55 |                  |    |   |    |     |   |     |   |      |      |      |   |     |
| 56 |                  |    |   |    |     |   |     |   |      |      |      |   |     |
| 57 |                  |    |   |    |     |   |     |   |      |      |      |   |     |
| 58 |                  |    |   |    |     |   |     |   |      |      |      |   |     |
| 59 |                  |    |   |    |     |   |     |   |      |      |      |   |     |
| 60 |                  |    |   |    |     |   |     |   |      |      |      |   |     |

|    |                                  |    |   |    |     |   |     |   |      |      |      |   |     |
|----|----------------------------------|----|---|----|-----|---|-----|---|------|------|------|---|-----|
| 1  |                                  |    |   |    |     |   |     |   |      |      |      |   |     |
| 2  |                                  |    |   |    |     |   |     |   |      |      |      |   |     |
| 3  |                                  |    |   |    |     |   |     |   |      |      |      |   |     |
| 4  | Myanmar                          | 37 | 0 | 37 | 258 | 0 | 258 | 0 | 0.00 | 0.00 | 0.00 | 0 | 131 |
| 5  | Namibia                          | 39 | 0 | 39 | 222 | 0 | 222 | 0 | 0.00 | 0.00 | 0.00 | 1 | 17  |
| 6  | Nauru                            | 19 | 0 | 19 | 52  | 0 | 52  | 0 | 0.00 | 0.00 | 0.00 | 2 | 59  |
| 7  | Nepal                            | 39 | 0 | 39 | 265 | 0 | 265 | 0 | 0.00 | 0.00 | 0.00 | 0 | 86  |
| 8  | Netherlands Antilles             | 2  | 0 | 2  | 12  | 0 | 12  | 0 | 0.00 | 0.00 | 0.00 | 0 | 177 |
| 9  | Nicaragua                        | 37 | 0 | 37 | 201 | 0 | 201 | 0 | 0.00 | 0.00 | 0.00 | 2 | 110 |
| 10 | Niger                            | 39 | 0 | 39 | 276 | 0 | 276 | 0 | 0.00 | 0.00 | 0.00 | 1 | 42  |
| 11 | Nigeria                          | 39 | 0 | 39 | 287 | 0 | 287 | 0 | 0.00 | 0.00 | 0.00 | 1 | 52  |
| 12 | Niue                             | 18 | 0 | 18 | 64  | 0 | 64  | 0 | 0.00 | 0.00 | 0.00 | 2 | 63  |
| 13 | North Korea                      | 32 | 0 | 32 | 127 | 0 | 127 | 0 | 0.00 | 0.00 | 0.00 | 2 | 72  |
| 14 | North Korea                      | 32 | 0 | 32 | 127 | 0 | 127 | 0 | 0.00 | 0.00 | 0.00 | 2 | 72  |
| 15 | Northern Mariana Islands         | 2  | 0 | 2  | 2   | 0 | 2   | 0 | 0.00 | 0.00 | 0.00 | 2 | 197 |
| 16 | Oman                             | 5  | 0 | 5  | 5   | 0 | 5   | 0 | 0.00 | 0.00 | 0.00 | 1 | 164 |
| 17 | Oman                             | 5  | 0 | 5  | 5   | 0 | 5   | 0 | 0.00 | 0.00 | 0.00 | 1 | 164 |
| 18 | Pakistan                         | 39 | 0 | 39 | 273 | 0 | 273 | 0 | 0.00 | 0.00 | 0.00 | 0 | 137 |
| 19 | Palau                            | 18 | 0 | 18 | 50  | 0 | 50  | 0 | 0.00 | 0.00 | 0.00 | 2 | 62  |
| 20 | Palestine                        | 34 | 0 | 34 | 125 | 0 | 125 | 0 | 0.00 | 0.00 | 0.00 | 2 | 151 |
| 21 | Panama                           | 35 | 0 | 35 | 142 | 0 | 142 | 0 | 0.00 | 0.00 | 0.00 | 2 | 105 |
| 22 | Panama                           | 35 | 0 | 35 | 142 | 0 | 142 | 0 | 0.00 | 0.00 | 0.00 | 2 | 105 |
| 23 | Papua New Guinea                 | 32 | 0 | 32 | 138 | 0 | 138 | 0 | 0.00 | 0.00 | 0.00 | 0 | 128 |
| 24 | Paraguay                         | 36 | 0 | 36 | 116 | 0 | 116 | 0 | 0.00 | 0.00 | 0.00 | 2 | 95  |
| 25 | Peru                             | 37 | 0 | 37 | 131 | 0 | 131 | 0 | 0.00 | 0.00 | 0.00 | 2 | 104 |
| 26 | Philippines                      | 39 | 0 | 39 | 248 | 0 | 248 | 0 | 0.00 | 0.00 | 0.00 | 0 | 120 |
| 27 | Poland                           | 4  | 0 | 4  | 6   | 0 | 6   | 0 | 0.00 | 0.00 | 0.00 | 1 | 168 |
| 28 | Poland                           | 4  | 0 | 4  | 6   | 0 | 6   | 0 | 0.00 | 0.00 | 0.00 | 1 | 168 |
| 29 | Romania                          | 5  | 0 | 5  | 34  | 0 | 34  | 0 | 0.00 | 0.00 | 0.00 | 2 | 155 |
| 30 | Russia                           | 8  | 0 | 8  | 36  | 0 | 36  | 0 | 0.00 | 0.00 | 0.00 | 2 | 147 |
| 31 | Rwanda                           | 39 | 0 | 39 | 276 | 0 | 276 | 0 | 0.00 | 0.00 | 0.00 | 1 | 27  |
| 32 | Saint Helena                     | 33 | 0 | 33 | 130 | 0 | 130 | 0 | 0.00 | 0.00 | 0.00 | 0 | 10  |
| 33 | Saint Helena                     | 33 | 0 | 33 | 130 | 0 | 130 | 0 | 0.00 | 0.00 | 0.00 | 0 | 10  |
| 34 | Saint Kitts and Nevis            | 8  | 0 | 8  | 47  | 0 | 47  | 0 | 0.00 | 0.00 | 0.00 | 2 | 152 |
| 35 | Saint Lucia                      | 33 | 0 | 33 | 107 | 0 | 107 | 0 | 0.00 | 0.00 | 0.00 | 2 | 93  |
| 36 | Saint Vincent and the Grenadines | 32 | 0 | 32 | 95  | 0 | 95  | 0 | 0.00 | 0.00 | 0.00 | 2 | 88  |
| 37 | Samoa                            | 26 | 0 | 26 | 106 | 0 | 106 | 0 | 0.00 | 0.00 | 0.00 | 3 | 65  |
| 38 | Sao Tome and Principe            | 38 | 0 | 38 | 230 | 0 | 230 | 0 | 0.00 | 0.00 | 0.00 | 3 | 4   |
| 39 | Sao Tome and Principe            | 38 | 0 | 38 | 230 | 0 | 230 | 0 | 0.00 | 0.00 | 0.00 | 3 | 4   |
| 40 | Saudi Arabia                     | 5  | 0 | 5  | 5   | 0 | 5   | 0 | 0.00 | 0.00 | 0.00 | 1 | 172 |
| 41 | Senegal                          | 39 | 0 | 39 | 283 | 0 | 283 | 0 | 0.00 | 0.00 | 0.00 | 1 | 39  |
| 42 | Serbia                           | 35 | 0 | 35 | 167 | 0 | 167 | 0 | 0.00 | 0.00 | 0.00 | 2 | 146 |
| 43 | Seychelles                       | 33 | 0 | 33 | 97  | 0 | 97  | 0 | 0.00 | 0.00 | 0.00 | 2 | 1   |
| 44 | Sierra Leone                     | 39 | 0 | 39 | 270 | 0 | 270 | 0 | 0.00 | 0.00 | 0.00 | 1 | 49  |
| 45 | Sierra Leone                     | 39 | 0 | 39 | 270 | 0 | 270 | 0 | 0.00 | 0.00 | 0.00 | 1 | 49  |
| 46 | Slovakia                         | 2  | 0 | 2  | 2   | 0 | 2   | 0 | 0.00 | 0.00 | 0.00 | 1 | 165 |
| 47 | Slovenia                         | 8  | 0 | 8  | 8   | 0 | 8   | 0 | 0.00 | 0.00 | 0.00 | 0 | 159 |
| 48 | Solomon Islands                  | 26 | 0 | 26 | 128 | 0 | 128 | 0 | 0.00 | 0.00 | 0.00 | 3 | 82  |
| 49 | Somalia                          | 39 | 0 | 39 | 252 | 0 | 252 | 0 | 0.00 | 0.00 | 0.00 | 1 | 15  |
| 50 | Somalia                          | 39 | 0 | 39 | 252 | 0 | 252 | 0 | 0.00 | 0.00 | 0.00 | 1 | 15  |
| 51 | South Africa                     | 39 | 0 | 39 | 260 | 0 | 260 | 0 | 0.00 | 0.00 | 0.00 | 0 | 24  |
| 52 | South Korea                      | 7  | 0 | 7  | 7   | 0 | 7   | 0 | 0.00 | 0.00 | 0.00 | 0 | 167 |
| 53 | South Sudan                      | 39 | 0 | 39 | 245 | 0 | 245 | 0 | 0.00 | 0.00 | 0.00 | 1 | 13  |
| 54 | Sri Lanka                        | 37 | 0 | 37 | 231 | 0 | 231 | 0 | 0.00 | 0.00 | 0.00 | 0 | 126 |
| 55 | Sri Lanka                        | 37 | 0 | 37 | 231 | 0 | 231 | 0 | 0.00 | 0.00 | 0.00 | 0 | 126 |
| 56 | Sudan                            | 39 | 0 | 39 | 272 | 0 | 272 | 0 | 0.00 | 0.00 | 0.00 | 1 | 26  |
| 57 |                                  |    |   |    |     |   |     |   |      |      |      |   |     |
| 58 |                                  |    |   |    |     |   |     |   |      |      |      |   |     |
| 59 |                                  |    |   |    |     |   |     |   |      |      |      |   |     |
| 60 |                                  |    |   |    |     |   |     |   |      |      |      |   |     |

|    |                           |    |   |    |     |   |     |   |      |      |      |   |     |
|----|---------------------------|----|---|----|-----|---|-----|---|------|------|------|---|-----|
| 1  |                           |    |   |    |     |   |     |   |      |      |      |   |     |
| 2  |                           |    |   |    |     |   |     |   |      |      |      |   |     |
| 3  |                           |    |   |    |     |   |     |   |      |      |      |   |     |
| 4  | Suriname                  | 34 | 0 | 34 | 107 | 0 | 107 | 0 | 0.00 | 0.00 | 0.00 | 2 | 96  |
| 5  | Swaziland                 | 38 | 0 | 38 | 201 | 0 | 201 | 0 | 0.00 | 0.00 | 0.00 | 0 | 11  |
| 6  | Syria                     | 38 | 0 | 38 | 195 | 0 | 195 | 0 | 0.00 | 0.00 | 0.00 | 0 | 67  |
| 7  | Tajikistan                | 37 | 0 | 37 | 248 | 0 | 248 | 0 | 0.00 | 0.00 | 0.00 | 0 | 83  |
| 8  | Tanzania                  | 39 | 0 | 39 | 285 | 0 | 285 | 0 | 0.00 | 0.00 | 0.00 | 1 | 53  |
| 9  | Thailand                  | 38 | 0 | 38 | 193 | 0 | 193 | 0 | 0.00 | 0.00 | 0.00 | 0 | 85  |
| 10 | The Gambia                | 39 | 0 | 39 | 248 | 0 | 248 | 0 | 0.00 | 0.00 | 0.00 | 1 | 28  |
| 11 | Timor-Leste               | 37 | 0 | 37 | 231 | 0 | 231 | 0 | 0.00 | 0.00 | 0.00 | 0 | 79  |
| 12 | Togo                      | 39 | 0 | 39 | 255 | 0 | 255 | 0 | 0.00 | 0.00 | 0.00 | 1 | 9   |
| 13 | Tokelau                   | 13 | 0 | 13 | 18  | 0 | 18  | 0 | 0.00 | 0.00 | 0.00 | 2 | 148 |
| 14 | Tonga                     | 23 | 0 | 23 | 99  | 0 | 99  | 0 | 0.00 | 0.00 | 0.00 | 3 | 60  |
| 15 | Trinidad and Tobago       | 11 | 0 | 11 | 52  | 0 | 52  | 0 | 0.00 | 0.00 | 0.00 | 2 | 116 |
| 16 | Tunisia                   | 37 | 0 | 37 | 172 | 0 | 172 | 0 | 0.00 | 0.00 | 0.00 | 2 | 8   |
| 17 | Turkey                    | 29 | 0 | 29 | 142 | 0 | 142 | 0 | 0.00 | 0.00 | 0.00 | 0 | 141 |
| 18 | Turkmenistan              | 36 | 0 | 36 | 158 | 0 | 158 | 0 | 0.00 | 0.00 | 0.00 | 3 | 69  |
| 19 | Turks and Caicos Islands  | 2  | 0 | 2  | 2   | 0 | 2   | 0 | 0.00 | 0.00 | 0.00 | 2 | 182 |
| 20 | Tuvalu                    | 21 | 0 | 21 | 93  | 0 | 93  | 0 | 0.00 | 0.00 | 0.00 | 3 | 61  |
| 21 | Uganda                    | 39 | 0 | 39 | 286 | 0 | 286 | 0 | 0.00 | 0.00 | 0.00 | 1 | 54  |
| 22 | Ukraine                   | 32 | 0 | 32 | 181 | 0 | 181 | 0 | 0.00 | 0.00 | 0.00 | 0 | 123 |
| 23 | Unallocated/Unspecified   | 45 | 0 | 45 | 357 | 0 | 357 | 0 | 0.00 | 0.00 | 0.00 | 1 | 56  |
| 24 | Uruguay                   | 31 | 0 | 31 | 78  | 0 | 78  | 0 | 0.00 | 0.00 | 0.00 | 2 | 101 |
| 25 | Uzbekistan                | 35 | 0 | 35 | 253 | 0 | 253 | 0 | 0.00 | 0.00 | 0.00 | 0 | 129 |
| 26 | Vanuatu                   | 25 | 0 | 25 | 76  | 0 | 76  | 0 | 0.00 | 0.00 | 0.00 | 2 | 71  |
| 27 | Venezuela                 | 34 | 0 | 34 | 106 | 0 | 106 | 0 | 0.00 | 0.00 | 0.00 | 2 | 99  |
| 28 | Vietnam                   | 39 | 0 | 39 | 270 | 0 | 270 | 0 | 0.00 | 0.00 | 0.00 | 0 | 133 |
| 29 | Wallis and Futuna Islands | 18 | 0 | 18 | 27  | 0 | 27  | 0 | 0.00 | 0.00 | 0.00 | 0 | 150 |
| 30 | Yemen                     | 37 | 0 | 37 | 249 | 0 | 249 | 0 | 0.00 | 0.00 | 0.00 | 3 | 84  |
| 31 | Zambia                    | 39 | 0 | 39 | 283 | 0 | 283 | 0 | 0.00 | 0.00 | 0.00 | 1 | 32  |
| 32 | Zimbabwe                  | 39 | 0 | 39 | 275 | 0 | 275 | 0 | 0.00 | 0.00 | 0.00 | 1 | 23  |

### Twitter network analysis statistics report

| Label          | indegree | outdegree | Degree | weighted indegree | weighted outdegree | Weighted Degree | Eccentricity | closenesscentrality | harmonicclosenesscentrality | betweennesscentrality | modularity_class | strongcompnum |
|----------------|----------|-----------|--------|-------------------|--------------------|-----------------|--------------|---------------------|-----------------------------|-----------------------|------------------|---------------|
| United States  | 0        | 8         | 8      | 0                 | 30                 | 30              | 3            | 0.38                | 0.44                        | 0.00                  | 0                | 67            |
| United Kingdom | 0        | 8         | 8      | 0                 | 29                 | 29              | 3            | 0.38                | 0.44                        | 0.00                  | 1                | 68            |
| BMGF           | 0        | 8         | 8      | 0                 | 35                 | 35              | 3            | 0.38                | 0.44                        | 0.00                  | 0                | 69            |
| WHO            | 3        | 9         | 12     | 17                | 29                 | 46              | 2            | 0.54                | 0.58                        | 23.50                 | 0                | 66            |
| World Bank     | 3        | 8         | 11     | 16                | 31                 | 47              | 2            | 0.54                | 0.58                        | 19.65                 | 1                | 65            |
| UNAIDS         | 3        | 9         | 12     | 8                 | 18                 | 26              | 2            | 0.54                | 0.58                        | 23.50                 | 0                | 64            |



|    |                   |   |    |    |    |    |    |   |      |      |       |   |    |
|----|-------------------|---|----|----|----|----|----|---|------|------|-------|---|----|
| 1  |                   |   |    |    |    |    |    |   |      |      |       |   |    |
| 2  |                   |   |    |    |    |    |    |   |      |      |       |   |    |
| 3  |                   |   |    |    |    |    |    |   |      |      |       |   |    |
| 4  | UNFPA             | 3 | 8  | 11 | 10 | 20 | 30 | 2 | 0.54 | 0.58 | 19.65 | 1 | 63 |
| 5  | UNICEF            | 3 | 9  | 12 | 13 | 28 | 41 | 2 | 0.54 | 0.58 | 23.50 | 1 | 62 |
| 6  | UNITAID           | 3 | 8  | 11 | 7  | 21 | 28 | 2 | 0.54 | 0.58 | 20.21 | 4 | 61 |
| 7  | GAVI              | 3 | 9  | 12 | 9  | 24 | 33 | 2 | 0.54 | 0.58 | 23.50 | 4 | 60 |
| 8  | GFATM             | 3 | 9  | 12 | 14 | 30 | 44 | 2 | 0.54 | 0.58 | 23.50 | 3 | 59 |
| 9  | Oxfam             | 8 | 10 | 18 | 28 | 10 | 38 | 1 | 1.00 | 1.00 | 40.64 | 1 | 58 |
| 10 | CDC               | 8 | 10 | 18 | 19 | 10 | 29 | 1 | 1.00 | 1.00 | 72.46 | 2 | 56 |
| 11 | EU CDC            | 6 | 10 | 16 | 13 | 10 | 23 | 1 | 1.00 | 1.00 | 62.06 | 3 | 51 |
| 12 | NIH               | 8 | 10 | 18 | 13 | 10 | 23 | 1 | 1.00 | 1.00 | 87.07 | 4 | 43 |
| 13 | FAO               | 7 | 9  | 16 | 13 | 9  | 22 | 1 | 1.00 | 1.00 | 67.06 | 1 | 35 |
| 14 | UNDP              | 8 | 10 | 18 | 33 | 10 | 43 | 1 | 1.00 | 1.00 | 41.00 | 1 | 28 |
| 15 | MSF               | 8 | 10 | 18 | 32 | 10 | 42 | 1 | 1.00 | 1.00 | 56.78 | 3 | 23 |
| 16 | PATH              | 8 | 10 | 18 | 30 | 10 | 40 | 1 | 1.00 | 1.00 | 59.94 | 4 | 17 |
| 17 | Save the Children | 8 | 9  | 17 | 20 | 9  | 29 | 1 | 1.00 | 1.00 | 46.99 | 1 | 9  |
| 18 | Access            | 1 | 0  | 1  | 1  | 0  | 1  | 0 | 0.00 | 0.00 | 0.00  | 4 | 16 |
| 19 | Africa            | 7 | 0  | 7  | 7  | 0  | 7  | 0 | 0.00 | 0.00 | 0.00  | 1 | 8  |
| 20 | Agriculture       | 1 | 0  | 1  | 1  | 0  | 1  | 0 | 0.00 | 0.00 | 0.00  | 1 | 34 |
| 21 | Biodiversity      | 1 | 0  | 1  | 1  | 0  | 1  | 0 | 0.00 | 0.00 | 0.00  | 1 | 33 |
| 22 | Breastfeeding     | 1 | 0  | 1  | 1  | 0  | 1  | 0 | 0.00 | 0.00 | 0.00  | 4 | 15 |
| 23 | Cancer            | 2 | 0  | 2  | 2  | 0  | 2  | 0 | 0.00 | 0.00 | 0.00  | 4 | 14 |
| 24 | Child Marriage    | 0 | 0  | 0  | 0  | 0  | 0  | 0 | 0.00 | 0.00 | 0.00  | 5 | 70 |
| 25 | Children          | 5 | 0  | 5  | 5  | 0  | 5  | 0 | 0.00 | 0.00 | 0.00  | 1 | 7  |
| 26 | Cholera           | 1 | 0  | 1  | 1  | 0  | 1  | 0 | 0.00 | 0.00 | 0.00  | 3 | 22 |
| 27 | Climate Change    | 3 | 0  | 3  | 3  | 0  | 3  | 0 | 0.00 | 0.00 | 0.00  | 1 | 27 |
| 28 | Development       | 0 | 0  | 0  | 0  | 0  | 0  | 0 | 0.00 | 0.00 | 0.00  | 6 | 71 |
| 29 | Diarrhea          | 1 | 0  | 1  | 1  | 0  | 1  | 0 | 0.00 | 0.00 | 0.00  | 2 | 55 |
| 30 | Discrimination    | 0 | 0  | 0  | 0  | 0  | 0  | 0 | 0.00 | 0.00 | 0.00  | 7 | 72 |
| 31 | Donations         | 1 | 0  | 1  | 1  | 0  | 1  | 0 | 0.00 | 0.00 | 0.00  | 1 | 6  |
| 32 | E. Coli           | 1 | 0  | 1  | 1  | 0  | 1  | 0 | 0.00 | 0.00 | 0.00  | 2 | 54 |
| 33 | Ebola             | 4 | 0  | 4  | 4  | 0  | 4  | 0 | 0.00 | 0.00 | 0.00  | 3 | 13 |
| 34 | Education         | 2 | 0  | 2  | 2  | 0  | 2  | 0 | 0.00 | 0.00 | 0.00  | 1 | 5  |
| 35 | FGM               | 1 | 0  | 1  | 1  | 0  | 1  | 0 | 0.00 | 0.00 | 0.00  | 1 | 26 |
| 36 | Families          | 1 | 0  | 1  | 1  | 0  | 1  | 0 | 0.00 | 0.00 | 0.00  | 1 | 32 |
| 37 | Family Planning   | 0 | 0  | 0  | 0  | 0  | 0  | 0 | 0.00 | 0.00 | 0.00  | 8 | 73 |
| 38 | Farmers           | 1 | 0  | 1  | 1  | 0  | 1  | 0 | 0.00 | 0.00 | 0.00  | 1 | 31 |
| 39 | Fisheries         | 1 | 0  | 1  | 1  | 0  | 1  | 0 | 0.00 | 0.00 | 0.00  | 1 | 30 |
| 40 | Food Security     | 4 | 0  | 4  | 4  | 0  | 4  | 0 | 0.00 | 0.00 | 0.00  | 1 | 4  |
| 41 | Forests           | 1 | 0  | 1  | 1  | 0  | 1  | 0 | 0.00 | 0.00 | 0.00  | 1 | 29 |
| 42 | Funding           | 1 | 0  | 1  | 1  | 0  | 1  | 0 | 0.00 | 0.00 | 0.00  | 4 | 42 |
| 43 | HIV/AIDS          | 4 | 0  | 4  | 4  | 0  | 4  | 0 | 0.00 | 0.00 | 0.00  | 1 | 21 |
| 44 | Heart Disease     | 1 | 0  | 1  | 1  | 0  | 1  | 0 | 0.00 | 0.00 | 0.00  | 4 | 41 |
| 45 | Hepatitis         | 1 | 0  | 1  | 1  | 0  | 1  | 0 | 0.00 | 0.00 | 0.00  | 3 | 50 |
| 46 | Human Rights      | 0 | 0  | 0  | 0  | 0  | 0  | 0 | 0.00 | 0.00 | 0.00  | 9 | 74 |
| 47 |                   |   |    |    |    |    |    |   |      |      |       |   |    |
| 48 |                   |   |    |    |    |    |    |   |      |      |       |   |    |
| 49 |                   |   |    |    |    |    |    |   |      |      |       |   |    |
| 50 |                   |   |    |    |    |    |    |   |      |      |       |   |    |
| 51 |                   |   |    |    |    |    |    |   |      |      |       |   |    |
| 52 |                   |   |    |    |    |    |    |   |      |      |       |   |    |
| 53 |                   |   |    |    |    |    |    |   |      |      |       |   |    |
| 54 |                   |   |    |    |    |    |    |   |      |      |       |   |    |
| 55 |                   |   |    |    |    |    |    |   |      |      |       |   |    |
| 56 |                   |   |    |    |    |    |    |   |      |      |       |   |    |
| 57 |                   |   |    |    |    |    |    |   |      |      |       |   |    |
| 58 |                   |   |    |    |    |    |    |   |      |      |       |   |    |
| 59 |                   |   |    |    |    |    |    |   |      |      |       |   |    |
| 60 |                   |   |    |    |    |    |    |   |      |      |       |   |    |

|    |               |   |   |   |   |   |   |   |      |      |      |       |
|----|---------------|---|---|---|---|---|---|---|------|------|------|-------|
| 1  |               |   |   |   |   |   |   |   |      |      |      |       |
| 2  |               |   |   |   |   |   |   |   |      |      |      |       |
| 3  | Humanitarian  |   |   |   |   |   |   |   |      |      |      |       |
| 4  | Aid           | 3 | 0 | 3 | 3 | 0 | 3 | 0 | 0.00 | 0.00 | 0.00 | 3 3   |
| 5  | Influenza     | 2 | 0 | 2 | 2 | 0 | 2 | 0 | 0.00 | 0.00 | 0.00 | 2 49  |
| 6  | Innovation    | 1 | 0 | 1 | 1 | 0 | 1 | 0 | 0.00 | 0.00 | 0.00 | 4 12  |
| 7  | Malaria       | 3 | 0 | 3 | 3 | 0 | 3 | 0 | 0.00 | 0.00 | 0.00 | 1 11  |
| 8  | Measles       | 2 | 0 | 2 | 2 | 0 | 2 | 0 | 0.00 | 0.00 | 0.00 | 3 48  |
| 9  | Mothers       | 0 | 0 | 0 | 0 | 0 | 0 | 0 | 0.00 | 0.00 | 0.00 | 10 75 |
| 10 | News          | 1 | 0 | 1 | 1 | 0 | 1 | 0 | 0.00 | 0.00 | 0.00 | 4 40  |
| 11 | Nutrition     | 0 | 0 | 0 | 0 | 0 | 0 | 0 | 0.00 | 0.00 | 0.00 | 11 76 |
| 12 | Online        | 0 | 0 | 0 | 0 | 0 | 0 | 0 | 0.00 | 0.00 | 0.00 | 12 77 |
| 13 | Outbreaks     | 1 | 0 | 1 | 1 | 0 | 1 | 0 | 0.00 | 0.00 | 0.00 | 3 47  |
| 14 | Pneumonia     | 1 | 0 | 1 | 1 | 0 | 1 | 0 | 0.00 | 0.00 | 0.00 | 1 57  |
| 15 | Pneumonia     | 2 | 0 | 2 | 2 | 0 | 2 | 0 | 0.00 | 0.00 | 0.00 | 1 2   |
| 16 | Polio         | 0 | 0 | 0 | 0 | 0 | 0 | 0 | 0.00 | 0.00 | 0.00 | 13 78 |
| 17 | Poverty       | 0 | 0 | 0 | 0 | 0 | 0 | 0 | 0.00 | 0.00 | 0.00 | 14 79 |
| 18 | Prevention    | 1 | 0 | 1 | 1 | 0 | 1 | 0 | 0.00 | 0.00 | 0.00 | 2 53  |
| 19 | Rare Disease  | 1 | 0 | 1 | 1 | 0 | 1 | 0 | 0.00 | 0.00 | 0.00 | 4 39  |
| 20 | Refugees      | 3 | 0 | 3 | 3 | 0 | 3 | 0 | 0.00 | 0.00 | 0.00 | 3 1   |
| 21 | Report        | 1 | 0 | 1 | 1 | 0 | 1 | 0 | 0.00 | 0.00 | 0.00 | 3 46  |
| 22 | Research      | 1 | 0 | 1 | 1 | 0 | 1 | 0 | 0.00 | 0.00 | 0.00 | 4 38  |
| 23 | Sanitation    | 0 | 0 | 0 | 0 | 0 | 0 | 0 | 0.00 | 0.00 | 0.00 | 15 80 |
| 24 | Schools       | 1 | 0 | 1 | 1 | 0 | 1 | 0 | 0.00 | 0.00 | 0.00 | 1 0   |
| 25 | South America | 0 | 0 | 0 | 0 | 0 | 0 | 0 | 0.00 | 0.00 | 0.00 | 16 81 |
| 26 | Stress        | 1 | 0 | 1 | 1 | 0 | 1 | 0 | 0.00 | 0.00 | 0.00 | 4 37  |
| 27 | Surveillance  | 1 | 0 | 1 | 1 | 0 | 1 | 0 | 0.00 | 0.00 | 0.00 | 3 45  |
| 28 | Testing       | 0 | 0 | 0 | 0 | 0 | 0 | 0 | 0.00 | 0.00 | 0.00 | 17 82 |
| 29 | Treatment     | 1 | 0 | 1 | 1 | 0 | 1 | 0 | 0.00 | 0.00 | 0.00 | 3 20  |
| 30 | Tuberculosis  | 2 | 0 | 2 | 2 | 0 | 2 | 0 | 0.00 | 0.00 | 0.00 | 3 19  |
| 31 | Vaccines      | 2 | 0 | 2 | 2 | 0 | 2 | 0 | 0.00 | 0.00 | 0.00 | 2 10  |
| 32 | Veterans      | 1 | 0 | 1 | 1 | 0 | 1 | 0 | 0.00 | 0.00 | 0.00 | 4 36  |
| 33 | Violence      | 1 | 0 | 1 | 1 | 0 | 1 | 0 | 0.00 | 0.00 | 0.00 | 3 18  |
| 34 | Water         | 3 | 0 | 3 | 3 | 0 | 3 | 0 | 0.00 | 0.00 | 0.00 | 2 25  |
| 35 | West Nile     | 1 | 0 | 1 | 1 | 0 | 1 | 0 | 0.00 | 0.00 | 0.00 | 3 44  |
| 36 | Women         | 3 | 0 | 3 | 3 | 0 | 3 | 0 | 0.00 | 0.00 | 0.00 | 2 24  |
| 37 | Zika          | 1 | 0 | 1 | 1 | 0 | 1 | 0 | 0.00 | 0.00 | 0.00 | 2 52  |
| 38 |               |   |   |   |   |   |   |   |      |      |      |       |
| 39 |               |   |   |   |   |   |   |   |      |      |      |       |
| 40 |               |   |   |   |   |   |   |   |      |      |      |       |
| 41 |               |   |   |   |   |   |   |   |      |      |      |       |
| 42 |               |   |   |   |   |   |   |   |      |      |      |       |
| 43 |               |   |   |   |   |   |   |   |      |      |      |       |
| 44 |               |   |   |   |   |   |   |   |      |      |      |       |
| 45 |               |   |   |   |   |   |   |   |      |      |      |       |
| 46 |               |   |   |   |   |   |   |   |      |      |      |       |
| 47 |               |   |   |   |   |   |   |   |      |      |      |       |
| 48 |               |   |   |   |   |   |   |   |      |      |      |       |
| 49 |               |   |   |   |   |   |   |   |      |      |      |       |
| 50 |               |   |   |   |   |   |   |   |      |      |      |       |
| 51 |               |   |   |   |   |   |   |   |      |      |      |       |
| 52 |               |   |   |   |   |   |   |   |      |      |      |       |
| 53 |               |   |   |   |   |   |   |   |      |      |      |       |
| 54 |               |   |   |   |   |   |   |   |      |      |      |       |
| 55 |               |   |   |   |   |   |   |   |      |      |      |       |
| 56 |               |   |   |   |   |   |   |   |      |      |      |       |
| 57 |               |   |   |   |   |   |   |   |      |      |      |       |
| 58 |               |   |   |   |   |   |   |   |      |      |      |       |
| 59 |               |   |   |   |   |   |   |   |      |      |      |       |
| 60 |               |   |   |   |   |   |   |   |      |      |      |       |

# BMJ Open

## Examining power dynamics in global health governance using topic modeling and network analysis of twitter data

|                                 |                                                                                                                                                                                                                                                                                                 |
|---------------------------------|-------------------------------------------------------------------------------------------------------------------------------------------------------------------------------------------------------------------------------------------------------------------------------------------------|
| Journal:                        | <i>BMJ Open</i>                                                                                                                                                                                                                                                                                 |
| Manuscript ID                   | bmjopen-2021-054470.R2                                                                                                                                                                                                                                                                          |
| Article Type:                   | Original research                                                                                                                                                                                                                                                                               |
| Date Submitted by the Author:   | 17-Mar-2022                                                                                                                                                                                                                                                                                     |
| Complete List of Authors:       | Bermudez, Gian Franco; University of Pennsylvania, School of Social Policy and Practice<br>Prah, Jennifer; University of Pennsylvania, School of Social Policy and Practice                                                                                                                     |
| <b>Primary Subject Heading</b>: | Global health                                                                                                                                                                                                                                                                                   |
| Secondary Subject Heading:      | Health policy, Ethics, Public health                                                                                                                                                                                                                                                            |
| Keywords:                       | Health policy < HEALTH SERVICES ADMINISTRATION & MANAGEMENT, International health services < HEALTH SERVICES ADMINISTRATION & MANAGEMENT, Public health < INFECTIOUS DISEASES, Information technology < BIOTECHNOLOGY & BIOINFORMATICS, Rationing < HEALTH SERVICES ADMINISTRATION & MANAGEMENT |
|                                 |                                                                                                                                                                                                                                                                                                 |

SCHOLARONE™  
Manuscripts



I, the Submitting Author has the right to grant and does grant on behalf of all authors of the Work (as defined in the below author licence), an exclusive licence and/or a non-exclusive licence for contributions from authors who are: i) UK Crown employees; ii) where BMJ has agreed a CC-BY licence shall apply, and/or iii) in accordance with the terms applicable for US Federal Government officers or employees acting as part of their official duties; on a worldwide, perpetual, irrevocable, royalty-free basis to BMJ Publishing Group Ltd ("BMJ") its licensees and where the relevant Journal is co-owned by BMJ to the co-owners of the Journal, to publish the Work in this journal and any other BMJ products and to exploit all rights, as set out in our [licence](#).

The Submitting Author accepts and understands that any supply made under these terms is made by BMJ to the Submitting Author unless you are acting as an employee on behalf of your employer or a postgraduate student of an affiliated institution which is paying any applicable article publishing charge ("APC") for Open Access articles. Where the Submitting Author wishes to make the Work available on an Open Access basis (and intends to pay the relevant APC), the terms of reuse of such Open Access shall be governed by a Creative Commons licence – details of these licences and which [Creative Commons](#) licence will apply to this Work are set out in our licence referred to above.

Other than as permitted in any relevant BMJ Author's Self Archiving Policies, I confirm this Work has not been accepted for publication elsewhere, is not being considered for publication elsewhere and does not duplicate material already published. I confirm all authors consent to publication of this Work and authorise the granting of this licence.

1  
2  
3  
4 **Title:** Examining power dynamics in global health governance  
5 using topic modeling and network analysis of twitter data  
6  
7

8 **Authors:** Gian Franco Bermudez<sup>1</sup>, Jennifer J. Prah<sup>2</sup>  
9

10 **Affiliations:**  
11

12  
13 <sup>1</sup>University of Pennsylvania, School of Social Policy and Practice, Philadelphia,  
14 Pennsylvania, United States  
15

16 <sup>2</sup>University of Pennsylvania, School of Social Policy and Practice and Perelman School  
17 of Medicine, Philadelphia, Pennsylvania, United States  
18

19 **Correspondence to:**  
20

21 Dr. Jennifer J. Prah

22 Email: jenpr@upenn.edu

23 Address: 3701 Locust Walk, Caster Building, D-4, Philadelphia, PA 19104-6214

24 Office Phone: +1-215-746-1330  
25  
26

27 **Keywords:** Health policy, international health services, public health, information  
28 technology, rationing  
29

30 **Word Count:** 4,832  
31  
32  
33  
34  
35  
36  
37  
38  
39  
40  
41  
42  
43  
44  
45  
46  
47  
48  
49  
50  
51  
52  
53  
54  
55  
56  
57  
58  
59  
60

## Structured Abstract:

**Objectives:** Despite increases in global health actors and funding levels, health inequities persist. We empirically tested whether global health governance (GHG) operates under the Rational Actor Model (RAM) and characterized GHG power dynamics.

**Design:** We collected approximately 75,000 tweets of 20 key global health actors, between 2016 and 2020 using Twitter API. We generated priorities from tweets collected using topic modeling. Priorities from tweets were compared with stated priorities from content analyses of policy documents and with revealed priorities from network analyses of development assistance for health funding data. Comparing priorities derived from Twitter, policy documents, and funding data, we can test if GHG operates under RAM and characterize power dynamics in GHG.

**Participants:** 20 global health actors were identified based on a consensus of 3 peer-reviewed articles mapping global health networks. All tweets of each actor were collected in three-month intervals from November 2016 to May 2020. Policy documents and DAH financial data for each actor were collected for the same period.

**Results:** We find all 20 actors and the global health system collectively fulfill the 3 conditions of RAM based on stated and revealed priorities. We also find compulsory and institutional power asymmetries in GHG. Funding organizations have compulsory power over channels of DAH and implementing institutions they directly fund. Funding organizations also have transitive influence over implementing institutions receiving DAH funding.

**Conclusions:** We find that there is a correlation between the priorities of large funders and the priorities of health actors. This correlation in conjunction with GHG operating under the RAM and the asymmetric power held by funders raises issues. GHG under the RAM grants large funders majority of the power to determine global health priorities, and ultimately influencing outcomes while implementing organizations, especially those that work closest with populations, have little to no influence in priority-setting.

## Strengths and limitations of this study:

- This study utilizes an alternative methodology of using Twitter data in understanding global health governance and priority-setting.
- This study triangulates findings from multiple data sources to test the rational actor model and to characterize power asymmetries in global health governance.
- Because the scope of this study is from 2016 to 2020, the findings may not be fully representative of global health governance during the COVID-19 pandemic.
- Only the key 20 actors of the hundreds of global health actors today were included in the study.

## INTRODUCTION

The turn of the 21st century introduced an unprecedented volume of new public and private actors in global health accompanied by stratospheric levels of funding.[1] While some argue that this multiplicity of new actors promotes cooperation, what persists is a politically fragmented network of actors with competing priorities and preferences.[2–4] Academics studying the complex network of global health actors have described it as a “congested” and “chaotic” network that causes inefficiencies in the practice and delivery of global health programs and aid.[5]

Inequities in global health have increasingly been attributed to the actions of transnational actors with varying degrees of power and divergent interests.[6] While more actors have entered global health with ostensible benevolent purposes, health inequities and inefficiencies in delivery still exist today. Fierce competition among donor priorities and requirements overwhelms the institutional capacities of recipient countries,[7,8] disrupts national health planning,[9] delays the delivery of aid,[10] and creates duplications and resource waste.[11,12] Paradoxically, despite the exponential increases in global health actors and funding, preventable global health inequities have persisted.

Researchers have presented at least two arguments attempting to understand this paradox through the lens of economics, politics, and power. First, global health governance (GHG) has been theorized as operating under the rational actor model (RAM) where “each actor has its own set of goals and objectives, and these actors take actions based on analysis of the costs and benefits of various available options.”[13] Under RAM, each actor acts on their own set of explicit and implicit goals. Explicit goals come in the form of mission statements, bylaws, and other founding documents. Implicit goals are priorities revealed from past decisions and behaviors. It is theorized that under RAM, prioritization in GHG is based on the aggregation of individual explicit and implicit objectives.

Second, the Lancet-University of Oslo Commission on Global Governance for Health (2014) argues that “power asymmetry and global social norms limit the range of choice and constrain action on health inequity.”[6] The actions of powerful global health actors in pursuit of their own interests “are not designed to harm health but can have negative side-effects” that may have contributed to the persistence of inequities.[6] The lack of power of global health beneficiaries and smaller health actors, and the outsized wielded power of large global health funders may also have contributed to the slow rate of reduction in global health inequities.

The argument that GHG operates under the RAM and the Commission on Global Governance for Health’s argument about power asymmetry are mainly theoretical ideas about the behaviors of global health actors founded on a collection of studies within specific nations, regions, or institutions. What is necessary is empirical evidence at the global level that can confirm, deny or recharacterize these characterizations of how global health currently operates. Empirical evidence at the global level eliminates doubts of how decisions are currently made in global health and can guide GHG towards addressing the world’s inequities in health.



We aim to empirically test the following research questions at the global level: (1) does GHG operate under the RAM? and (2) how can we characterize power dynamics in GHG?

We hypothesize that GHG operates under RAM and that there are power asymmetries in GHG that limit the range of health priorities. We analyzed empirical evidence from Twitter, funding data, and policy documents at the global level to test whether GHG operates under RAM and to characterize the power dynamics in GHG.

## METHODS

We test if GHG operates under the RAM and characterize the power dynamics in GHG through the lens of global health priority-setting. All global health actors have certain preferences for health issues and act in alignment with these priorities.

Priorities can either be stated or revealed. Stated priorities are those preferences explicitly stated in a health actor's founding documents, websites, and annual reports. The mission statements and the health areas each actor explicitly mention in their official documents and websites are stated priorities. Revealed priorities are preferences that are gleaned from records of past behaviors and choices. Past health funding allocations and accounts of implemented programs and policies are revealed priorities. Revealed priorities may or may not be aligned with stated priorities.

We use evidence for both stated and revealed priorities from 2016 to 2020 to test our research questions.

### Study Sample

We identified 20 key global health actors based on a consensus among three past studies that mapped the global health network using quantitative and qualitative methodologies.[4, 14, 15] As shown in Table 1, the key global health actors were categorized based on their nature of work in global health. Global health actors were either funding organizations, channels of developmental assistance for health (DAH) or implementing institutions. While most actors fall into multiple categories in practice, for the integrity of this analysis, organizations were limited to only one category based on the nature of their main line of work.

**Table 1. Summary of Global Health Actors.** Characteristics of the 20 global health actors analyzed in this study.

| Nature of Work in Global Health                 | Organizational Category       | Twitter Username | Global Health Actor                                 | Number of Twitter Followers (as of October 2021) |
|-------------------------------------------------|-------------------------------|------------------|-----------------------------------------------------|--------------------------------------------------|
| Channels of Developmental Assistance for Health | Global health initiative      | gavi             | Gavi, the Vaccine Alliance                          | 153,000                                          |
|                                                 |                               | UNITAID          | Unitaid                                             | 17,200                                           |
|                                                 |                               | GlobalFund       | Global Fund to Fight AIDS, Tuberculosis and Malaria | 240,100                                          |
|                                                 | Multilateral Development Bank | WorldBank        | World Bank                                          | 3,500,000                                        |
|                                                 | United Nations System         | WHO              | World Health Organization                           | 10,000,000                                       |
|                                                 |                               | UNAIDS           | Joint United Nations Programme on HIV/AIDS (UNAIDS) | 286,800                                          |
|                                                 |                               | UNFPA            | United Nations Population Fund (UNFPA)              | 260,800                                          |
|                                                 |                               | UNICEF           | United Nations Children's Fund (UNICEF)             | 8,900,000                                        |

|                           |                            |                 |                                                                    |           |
|---------------------------|----------------------------|-----------------|--------------------------------------------------------------------|-----------|
| Funding Organizations     | National Government        | USAID           | United States Agency for International Development (USAID)         | 843,200   |
|                           |                            | DFID_UK*        | United Kingdom Department for International Development (UK DFID)* | 1,000,000 |
|                           | Philanthropic Organization | gatesfoundation | Bill and Melinda Gates Foundation                                  | 2,100,000 |
| Implementing Institutions | Global CSO/NGO             | MSF             | Doctors Without Borders (MSF)                                      | 165,100   |
|                           |                            | PATHtweets      | PATH                                                               | 59,500    |
|                           |                            | SavetheChildren | Save the Children                                                  | 2,700,000 |
|                           |                            | Oxfam           | Oxfam International                                                | 836,300   |
|                           | United Nations System      | FAO             | Food and Agriculture Organization (FAO)                            | 469,600   |
|                           |                            | UNDP            | United Nations Development Programme (UNDP)                        | 1,600,000 |
|                           | National Government        | CDCgov          | Centers for Disease Control and Prevention (CDC)                   | 4,300,000 |
|                           |                            | ECDC_EU         | European Centre for Disease Prevention and Control (ECDC)          | 90,600    |
|                           |                            | NIH             | National Institutes of Health (NIH)                                | 1,400,000 |

\* UK DFID is now the Foreign, Commonwealth, and Development Office. During the time of the analysis, the UK's agency for aid was known as DFID.

## Patient and public involvement

Patients and the public were not involved in the development of the research questions and outcome measures.

## Data Sources

We analyze stated and revealed priorities of 20 key global health actors from three data sources – policy documents, DAH funding data, and tweets. Table 2 summarizes each data source, how they were collected, how they were analyzed, and what types of priorities can be derived.

**Table 2. Summary of Data Source, Collection, and Analysis.** Description of how data is collected and analyzed in the study.

| Data Source      | Data Collection                                                                                                                       | Analysis                                                       | Type of Priorities Derived from Source |
|------------------|---------------------------------------------------------------------------------------------------------------------------------------|----------------------------------------------------------------|----------------------------------------|
| Policy Documents | Manual collection of annual reports, policy documents, and official communications from official websites of each global health actor | Manual content analysis                                        | Stated                                 |
| DAH Funding Data | Queried funding allocation data of each global health actor from the International Health Metrics and Evaluation (IHME) DAH Database  | Descriptive statistics; network analysis                       | Revealed                               |
| Twitter Data     | Collected all the tweets of each global health actor from November 2016 to May 2020 in three month intervals using the Twitter API    | Natural language processing (topic modeling); network analysis | Revealed                               |

## Drawing stated priorities from policy documents

Stated priorities are obtained from a manual content analysis of policy documents, annual reports, and official websites of global health actors.

1  
2  
3 Available policy documents, annual reports, and relevant official communications from  
4 the websites of each global health actor between 2016 and 2020 were collected.  
5 Manual content analysis was conducted to evaluate the available policy documents for  
6 each global health actor and identify their respective stated priorities.  
7

8 The stated priorities drawn from these documents were commonly obtained from official  
9 statements that fall under the following headings: “strategic priorities,” “program  
10 priorities,” “strategic objectives,” “focus areas,” “strategic work areas,” “program focus,”  
11 “Strategy 20XX-20XX,” “strategic goals,” “priority areas,” among others. Supplementary  
12 Table 1 contains the stated priorities obtained from each actor.  
13

### 14 **Deriving revealed priorities from funding data**

15  
16 The first of two ways we derive revealed priorities is by using a network analysis and  
17 descriptive statistics of financial flows in DAH funding data.  
18

19 Data from the Institute for Health Metrics and Evaluation’s (IHME) Developmental  
20 Assistance for Health Database was collected for 2019.[16] The database includes  
21 approximately 800,000 transactions of health financing from funding organizations to  
22 channels of DAH and to implementing countries.  
23

24 Descriptive statistics were conducted to determine the allocations of funding for each  
25 health area and geographic region for the 20 global health actors in 2019.  
26

27 Network analysis is an analytic method that has proved to be useful in understanding  
28 relational dynamics across actors in global and public health.[17,18] Network analysis  
29 was conducted to observe the funding relationships between global health actors. Gephi  
30 0.9.2 was used in constructing and analyzing the network map. The network modelled  
31 in the study allows for a visualization of the flows of global health funding in 2019. In the  
32 network map, nodes represent global health actors and lines or “edges” indicate a flow  
33 of funding in global health. The Fruchterman-Reingold algorithm was used in modelling  
34 the network map. The algorithm “calculates the optimal layout so that nodes with less  
35 strength and less connections are placed further apart, and those with more and/or  
36 stronger connections are placed closer to each other.”[19] The thickness of edges  
37 represents the amount of funding transferred between actors. The modelled network is  
38 discussed in the findings section.  
39  
40

### 41 **Twitter data**

42  
43 The second way we derive revealed priorities is by using topic modeling in natural  
44 language processing (NLP) and conducting a network analysis of the global health  
45 actors’ tweets.  
46

47 Using the Twitter API, we collected all the tweets of each global health actor by  
48 username from November 2016 to May 2020 in three-month intervals. This means that  
49 all the tweets of each global health actor were collected for each day in the months of  
50 February, May, August, and November for each year. An interval of three months was  
51 decided for two reasons. First, a variation in the issues, topics, and themes that global  
52 health actors’ tweet can be observed in three-month intervals. Initial small sample  
53 testing indicates that collecting all the tweets of every month for each actor yields  
54 redundancy in issues and topics observed. Redundancy is eliminated in three-month  
55 intervals. Second, it also allows for efficient usage of the data request limits of the  
56  
57  
58  
59

1  
2  
3 Twitter API. As Twitter limits the number of tweets one can collect from the Twitter API,  
4 this interval is an efficient way of collecting data for the timeframe. A total of 74,241  
5 tweets were collected from 2016 to 2020 for the 20 global health actors. Supplementary  
6 Tables 2 and 3 describe the tweets collected.  
7

8 Using Twitter as a data source plays an important role in analyzing GHG. In the  
9 academic area of communications studies, researchers suggest that there are two  
10 forms of utility that motivate actors to post content on Twitter. First, intrinsic utility  
11 assumes that a user receives inherent satisfaction from posting content on Twitter.[20]  
12 While global health actors do not necessarily receive the same “inherent satisfaction” as  
13 individual Twitter users, global health actors acquire more intrinsic utility as their  
14 communications reach a greater number of users. Second, image-related utility  
15 assumes that the perceptions of others,[21,22] and seeking status are strong motivators  
16 for posting content.[23,24] As global health actors operate best with high public  
17 approval, posting content on Twitter can improve public perception. Twitter is the ideal  
18 platform for global health actors to simultaneously share their work to a greater number  
19 of individuals and to improve their public perception.  
20  
21

22 Because Twitter limits each post to 280 characters, the platform promotes short,  
23 frequent, and straightforward manners of communication. The tweets of global health  
24 actors are regular ways of communicating their work, preferences, and priorities to the  
25 public.[25–28] The tweets of global health actors act as an archive, a record of historical  
26 preferences, priorities, goals, and implemented programs.[29]  
27  
28

29 We consider tweets equally to funding data as they both reveal priorities through  
30 documentation of past decisions, preferences, and goals. Funding data is a record of  
31 priorities in the form of financial flows and transactions towards certain global health  
32 issues. Twitter is a record of priorities in the form of programs, policies, and opinions  
33 deemed important and necessary to communicate with the world. Because of their  
34 archival nature, both funding data and tweets reveal priorities through complementing  
35 records of decisions.  
36

37 While tweets can represent both stated and revealed priorities, for this study, we use  
38 tweets to represent revealed priorities. Since this study analyzes tweets in aggregation,  
39 our findings reveal the top themes discussed by each actor from 2016–2020. Because  
40 we do not analyze each tweet at an individual level, tweets are considered revealed  
41 priorities and not stated priorities.  
42  
43

#### 44 **Obtaining revealed priorities from Twitter data**

45 NLP is a subfield in artificial intelligence, computer science, and linguistics at the  
46 intersection of the human language and computers. NLP utilizes computers to process  
47 and analyze large quantities of human language data. We use NLP to analyze the  
48 tweets of the global health actors for two reasons. First, NLP allows for the efficient  
49 analysis of tens of thousands of rows of text data that could not be done manually.[30–  
50 32] Second, NLP allows for topic modeling, an algorithm that generates lists of words  
51 frequently used together.[33–35] These lists of words correspond to themes, topics, or  
52 issues that can be used to identify the top 10 priorities of each global health actor. The  
53 results are then used in a network analysis that visualizes where actors converge or  
54 diverge in global health priorities.  
55  
56  
57  
58  
59  
60

As seen in Table 3, ten topics were generated using the Latent Dirichlet Allocation (LDA) topic model for each global health actor's tweets to reveal their priorities from 2016 to 2020. LDA is a generative probabilistic modeling method where words in a corpus of text that are frequently used together are categorized into topics.[36] This follows the assumption that documents, or in this case Twitter profiles, can be broken down into multiple topics that are identified by certain combinations of words.

**Table 3. Revealed Priorities from Twitter Topic Modeling.** Ten revealed priorities of each of the 20 global health actors based on their tweets from 2016 to 2020. Priorities are alphabetically arranged. Red indicates Funding Organizations. Blue indicates Channels of DAH. Gray indicates Implementing Institution.

| United States    | United Kingdom   | Gates Foundation | WHO           | World Bank       | UNAIDS         | UNFPA            | UNICEF         | UNITAID           | GAVI             |
|------------------|------------------|------------------|---------------|------------------|----------------|------------------|----------------|-------------------|------------------|
| Africa           | Africa           | Africa           | Africa        | Africa           | Access         | Africa           | Africa         | Access            | Africa           |
| Children         | Agriculture      | Breastfeeding    | Breastfeeding | Agriculture      | Africa         | Child Marriage   | Breastfeeding  | Cancer            | Cancer           |
| Education        | Children         | Children         | Children      | Children         | Discrimination | Children         | Children       | Children          | Children         |
| Food Security    | Development      | Education        | Ebola         | Climate Change   | HIV/AIDS       | Family Planning  | Climate Change | Hepatitis         | Cholera          |
| HIV/AIDS         | Ebola            | HIV/AIDS         | HIV/AIDS      | Food Security    | Human Rights   | FGM              | Ebola          | HIV/AIDS          | Ebola            |
| Humanitarian Aid | Education        | Malaria          | Malaria       | Humanitarian Aid | Innovation     | Human Rights     | Education      | Malaria           | Measles          |
| Mothers          | Food Security    | Mothers          | Measles       | Poverty          | Prevention     | Humanitarian Aid | Human Rights   | Testing           | Pneumonia        |
| South America    | HIV/AIDS         | Polio            | Mothers       | Sanitation       | Testing        | Nutrition        | Online         | Treatment         | Polio            |
| Water            | Humanitarian Aid | Sanitation       | Polio         | Water            | Treatment      | Violence         | Violence       | Tuberculosis      | Poverty          |
| Women            | Water            | Women            | Women         | Women            | Women          | Women            | Water          | Vaccines          | Vaccines         |
| Global Fund      | CDC              | EU CDC           | NIH           | FAO              | UNDP           | MSF              | PATH           | Save the Children | Oxfam            |
| Africa           | Children         | Ebola            | Africa        | Africa           | Africa         | Africa           | Access         | Africa            | Africa           |
| Children         | Diarrhea         | Hepatitis        | Cancer        | Agriculture      | Children       | Children         | Africa         | Children          | Climate Change   |
| Cholera          | E. Coli          | HIV/AIDS         | Funding       | Biodiversity     | Climate Change | Cholera          | Breastfeeding  | Donations         | Ebola            |
| Ebola            | Influenza        | Influenza        | Heart Disease | Climate Change   | Education      | Ebola            | Cancer         | Education         | Food Security    |
| HIV/AIDS         | Measles          | Measles          | HIV/AIDS      | Families         | FGM            | HIV/AIDS         | Children       | Food Security     | Humanitarian Aid |
| Malaria          | Prevention       | Outbreaks        | News          | Farmers          | Food Security  | Humanitarian Aid | Ebola          | Humanitarian Aid  | Malaria          |
| Pneumonia        | Vaccines         | Report           | Rare Disease  | Fisheries        | HIV/AIDS       | Refugees         | Innovation     | Pneumonia         | Pneumonia        |
| Polio            | Water            | Surveillance     | Research      | Food Security    | Malaria        | Treatment        | Malaria        | Refugees          | Refugees         |
| Tuberculosis     | Women            | Tuberculosis     | Stress        | Forests          | Water          | Tuberculosis     | Pneumonia      | Schools           | Water            |
| Women            | Zika             | West Nile        | Veterans      | Water            | Women          | Violence         | Vaccines       | Water             | Women            |

Additionally, we model a network map from the priorities generated using the LDA topic model also using the Fruchterman-Reingold algorithm. This network map visualizes the similarities in priorities between the 20 actors. Data used for this network map can be found in Supplementary Table 4. This network map is compared with the network map generated using financial data from IHME in the findings section. This comparison between network maps can illustrate if priorities from tweets and from financial data are aligned. Further details on LDA and network maps can be found in Supplemental Methods.

### Testing if GHG operates under the RAM

By combining evidence for stated and revealed priorities of 20 key global health actors, we can determine if GHG operates under the RAM.



1  
2  
3 The rational actor model (RAM) in international cooperation is categorized as the  
4 “linchpin of foreign policy decision making.”[37] This approach is rooted in expected  
5 utility theory in microeconomics introduced by von Neumann and Morgenstern in the  
6 1940s and subsequent theories of rationality.[38]  
7

8 RAM is most useful in explanations of economic behavior if the three conditions of the  
9 rationality assumption are fulfilled.[37] First, it is assumed that an actor’s goal is pre-  
10 determined before intentionally acting to achieve it.[37] Second, actors are assumed to  
11 “display consistent preferences as manifested in the ability to rank the preferences in  
12 transitive order.”[37] Third, actors are assumed to maximize utility while choosing an  
13 alternative that provides the highest amount of net personal benefit.[37]  
14

15 “Rational” in this case does not simply mean a dispassionate calculation of costs and  
16 benefits. In the case of global health actors, acting rationally means weighing both  
17 economic and political factors, and acting according to the three assumptions of RAM.  
18

19 “To maximize utility” in this study refers to maximizing the net personal benefits however  
20 defined by the health actor. It can be defined as financial benefits, ethical benefits such  
21 as equity, or however else the health actor defines their utility.  
22

23 GHG operates under RAM if each of the 20 global health actors and the global health  
24 system collectively fulfill the three assumptions of pre-determined goal, rank order  
25 preferences, and benefit maximization.  
26

27 To test the first assumption of pre-determined goal, we determine the stated priorities of  
28 each global health actor from policy documents. We test whether there exist explicit  
29 statements on goals and priorities and note what health areas or issues are the stated  
30 priorities of each global health actor.  
31

32 To test the second assumption of consistent rank order preferences, we compare  
33 revealed priorities from DAH funding data and revealed priorities from tweets. From the  
34 funding data, we can determine rank order preferences based on which health issues  
35 are allocated the most funding in 2019. From tweets, we can determine rank order  
36 preferences based on the top 10 topics each global health actor tweeted about from  
37 2016 to 2020. If there is consistency in rank order preferences between the revealed  
38 priorities from funding data and revealed priorities from tweets, then the second  
39 assumption is fulfilled.  
40

41 To test the third assumption of benefit maximization, we compare the stated and  
42 revealed priorities from all three data sources. The priorities that are consistent across  
43 stated priorities from policy documents and revealed priorities from funding data and  
44 from tweets are revealed to be the priority that the global health actor determines to be  
45 benefit maximizing. An alignment of a preference across the three different sources can  
46 lead us to believe with some certainty that it is the actor’s benefit-maximizing  
47 preference. While indirect, we believe this method of determining benefit-maximizing  
48 preference is the best method given the available data.  
49

50 We also test the three assumptions at the global health system level. Pre-determined  
51 goals are obtained from stated priorities from collective stated commitments to global  
52 health based on Sustainable Development Goal 3 (SDG3) of “good health and well-  
53 being” as all 20 of the actors in this study have stated commitments to this goal.  
54  
55  
56  
57  
58  
59

1  
2  
3 Consistent rank order preferences are derived from the alignment between aggregated  
4 DAH funding allocations of all global health actors and the most common topics  
5 generated from tweets across all global health actors. The consistent preferences  
6 across stated and revealed priorities are inferred to be the global health systems'  
7 benefit-maximizing preference.  
8

9  
10 If each global health actor and the global health system collectively fulfill the three  
11 assumptions, then GHG operates under the RAM.

### 12 **Characterizing power dynamics in GHG**

13 We use the following typology of power when characterizing power dynamics in GHG.  
14 "Power is exercised everywhere in global health although its presence may be more  
15 apparent in some instances than others,"[39] one global health researcher notes. The  
16 power concept in global health does not stray far from Robert Dahl's (1957) definition in  
17 his seminal study where he describes "A has power over B to the extent that he can get  
18 B to do something B would not otherwise do." [40] One way to categorize power is  
19 through the four types introduced by Barnett and Duvall (2005), each manifesting in  
20 different manners in global health.[41] Supplementary Table 5 summarizes Barnett and  
21 Duvall's four types of power. First, compulsory power is defined as "direct control of one  
22 actor over the conditions of existence or the actions of another." [41] In global health,  
23 compulsory power can be seen in how donor countries dictate the conditions in low and  
24 middle-income countries (LMICs) through development aid.[42] Second, institutional  
25 power is "the control actors exercise indirectly over others through diffuse relations of  
26 interactions." [41] High-income countries control funding allocations for LMICs through  
27 institutional power via their contributions to multilateral organizations. Third, structural  
28 power refers to the "constitution of subjects' capacities in direct structural relation to one  
29 another." [41] The structural and historical disempowerment of indigenous populations  
30 have resulted in their disproportionate outcomes in health.[43,44] Fourth, "productive  
31 power works through diffuse constitutive relations to produce the situated social  
32 capacities of actors." [40] Research institutions funded by high-income countries direct  
33 what health issues are studied and addressed.[45]  
34  
35  
36  
37  
38  
39

40 To characterize the power dynamics in GHG, we analyze the interplay of stated and  
41 revealed priorities between funding organizations, channels of DAH, and implementing  
42 organizations. Particularly, we identify which global health actors have the most  
43 influence in setting global health priorities. The global health actors which have the most  
44 priorities aligned with the stated and revealed priorities of the global health system are  
45 determined to have the most influence and power in priority-setting.  
46  
47

## 48 **DISCUSSION**

### 49 **GHG operates under RAM**

50 As seen in Supplementary Table 1, we find that each of the 20 key global health actors  
51 fulfills the three assumptions of the RAM. Each actor has a pre-determined goal stated  
52 in policy documents, annual reports, and official websites. Each actor has consistent  
53 rank order preferences as observed in the alignment of order of preferences in DAH  
54  
55  
56  
57  
58  
59



1  
2  
3 funding data and top identified topics from tweets. Consistent, top-ranking preferences  
4 across policy documents, funding data, and tweets are the alternatives that maximize  
5 benefits for each global health actor based on their pre-determined goal.  
6

7 As an example, USAID's pre-determined goal is "advancing American security and  
8 prosperity" through providing aid in the health areas of child and maternal health,  
9 HIV/AIDS, malaria, and tuberculosis as found on their official website.[46] In 2019, 49%  
10 of aid from USAID support HIV/AIDS, 22% supported child and maternal health, and 7%  
11 to malaria.[47] The topic modelling for USAID's tweets shows that HIV/AIDS, child and  
12 maternal health, and malaria are the top themes tweeted about by the organization from  
13 2016-2020 (See Supplementary Table 1). USAID behaves under the RAM since their  
14 revealed priorities from past funding behavior and from tweets align with their pre-  
15 determined goal.  
16  
17

18 As shown in the last row of Supplementary Table 1, we find that the global health  
19 system collectively fulfills the three assumptions of the RAM. The pre-determined goal  
20 of the global health system can be found in the WHO constitution and the 9 target areas  
21 for SDG3 on good health and well-being. All 20 global health actors have stated  
22 commitments to the WHO mission and the SDGs. The alignment of DAH funding  
23 allocations and most common health issues from Twitter reveal that in terms of rank  
24 order, HIV/AIDS, child health, and maternal health are the top 3 priorities of the global  
25 health system collectively. To maximize benefits of the pre-determined goal of "health  
26 for all" and "SDG3: good health and well-being", the global health system prioritizes  
27 HIV/AIDS, child health, and maternal health. Among all 9 stated targets in SDG3, only  
28 these three issues are prioritized. Effectively, the 6 other stated targets in SDG3 are  
29 deprioritized and underfunded by the global health system.  
30  
31

32 Since each global health actor and the global health system collectively fulfills the three  
33 assumptions, we find that GHG operates under the RAM. This finding demonstrates that  
34 each global health actor operates based on their rational self-interest and that the global  
35 health system pursues only some pre-determined health priorities. Who determines  
36 which priorities are pursued by the global health system? The findings on power  
37 dynamics in GHG reveal the actors who determine global priorities.  
38  
39

### 40 **Compulsory and institutional power asymmetries in GHG**

41 As demonstrated in the following network maps, we find that there is compulsory and  
42 institutional power asymmetry in GHG.  
43

44 Compulsory power asymmetry can be found in how funding organizations strongly  
45 influence channels of DAH and implementing institutions based on their relationship.  
46 Channels of DAH and implementing institutions rely on funding organizations for  
47 resources to continue operating. We find that the top priorities of the 3 funding  
48 organizations in this study are also the priorities of channels of DAH and implementing  
49 institutions.  
50

51 [INSERT FIGURE 1 HERE]  
52

53 As seen in Figure 1, HIV/AIDS is 1st priority of United States Agency for International  
54 Development (USAID), 2nd priority of United Kingdom Department for International  
55 Development (UK-DFID), and 2nd priority of the Bill and Melinda Gates Foundation  
56  
57  
58  
59

(BMGF) based on the alignment of stated and revealed priorities. HIV/AIDS is a priority of 4 of 8 channels of DAH and 4 of 9 implementing institutions based on its presence in policy documents, DAH funding, and tweets of each actor.

Figure 1 also demonstrates that maternal and child health is 2nd priority of USAID, 1st priority of UK-DFID, and 1st priority of BMGF based on the alignment stated and revealed priorities. Maternal and child health is a priority of 6 of 8 channels of DAH and 7 of 9 implementing institutions based on its presence in policy documents, DAH funding, and tweets of each actor.

[INSERT FIGURE 2 HERE]

Following the flow of the funding in Figure 2 and the similarities in tweets in Figure 1, we can see that institutional power asymmetry can be found in how funding organizations strongly influence implementing institutions through outsized influence of channels of DAH that allocate funding to these implementing institutions. As some implementing institutions do not get direct funding from funding organizations, but through channels of DAH, their funding is controlled by channels of DAH. Because wealthy funding organizations influence the priorities of channels of DAH, transitively, funders have power over implementing institutions. Implementing institutions in turn align their priorities with the priorities of channels of DAH, and transitively with the priorities of funding organizations.

Both network analyses of revealed priorities from DAH funding data and from tweets show how there is asymmetric levels of power held by the United States, United Kingdom, and the Gates Foundation. Figure 2 reveals how these three funding organizations are the largest funders of the Global Fund, WHO, World Bank, US Foundations, UN organizations, and Gavi. The IHME DAH database reveals that 24% of all DAH funding was allocated to HIV/AIDS, 21% to child health, and 12% to maternal health – the three top priorities of funding organizations.[16] Only 14% was allocated to health system strengthening and 2% to non-communicable diseases.[16]

Figure 1 reveals how the most common topics generated across all global health actors include Africa, HIV/AIDS, child health, women health, and infectious diseases. These are the same health issues highly prioritized by the United States, United Kingdom, and Gates Foundation. Comparing figures 1 and 2, we find that these three funding organizations have outsized influence in priority-setting because of how much DAH funding these three organizations have provided relative to other funders. We find that the priorities from 2016 to 2020 documented through the tweets of actors align with these funders' priorities of HIV/AIDS, child health, maternal health, infectious disease, and Africa. This outsized influence of global health funders limits the range of funded programs and policies, especially making it difficult for smaller implementers to fund local programs and policies that do not neatly align with the priorities of large funders.

## Limitations

It is necessary to acknowledge the limitations of this study. First, we assume stated priorities match what is specified in organizational documents. It may be the case that some organizations communicate priorities differently from what is written in their foundational documents. Moreover, what is fundable may not necessarily be what is

1  
2  
3 deemed important. Second, we assume that health funding is indeed spent on what it is  
4 ostensibly spent on when deriving revealed preferences from funding data, which may  
5 not always be true. Third, our scope is limited to examining 20 global health actors from  
6 2016 to 2020. There are non-health actors and processes that likely influence health  
7 outcomes. Studying the stated and revealed priorities of non-health actors and  
8 processes such as foreign relations between nations and the influence of the private  
9 sector on health can improve the characterization of current GHG. Fourth, tweets may  
10 only reveal priorities that the actor wants to communicate. As organizations have teams  
11 that plan communications, priorities derived from Twitter may be limited and not reveal  
12 all priorities. While what happens behind closed doors in GHG is unknowable, tweets  
13 can reveal some of the implicit priorities of actors. Fifth, we derived benefit-maximizing  
14 preferences by identifying consistently top-ranking preferences across stated priorities  
15 from policy documents and revealed preferences from tweets and funding data. This  
16 manner of identifying benefit-maximizing preferences is indirect and does not  
17 necessitate that it is indeed what the actor believes is a benefit-maximizing preference.  
18 To be certain about what is benefit-maximizing can only be done by directly asking  
19 health actors. However, even within organizations, there are inconsistencies about what  
20 members think are benefit-maximizing. We acknowledge this indirect manner of deriving  
21 benefit-maximizing priorities is a limitation.  
22  
23  
24

## 25 **CONCLUSION**

26  
27 We find empirical evidence at the global level showing that GHG operates under the  
28 RAM. Additionally, we find that at the global level, there is asymmetric compulsory and  
29 institutional power held by funding organizations, allowing global health priorities to be  
30 largely influenced by large funders. In the past years, these funders have been the  
31 United States, United Kingdom, and the Gates Foundation.  
32

33 We find that there is a correlation between the priorities of large funders and the  
34 priorities of channels of DAH and implementing institutions. This correlation in  
35 conjunction with GHG operating under the RAM and the asymmetric power held by  
36 funders raises issues. What is worrying is that GHG under the RAM grants large  
37 funders majority of the power to determine where GHG resources go, and ultimately  
38 influencing outcomes. Effectively, this limits the range of health issues that are  
39 adequately funded. Additionally, if outcomes are unfavorable, funding organizations do  
40 not have full accountability even if they have outsized influence in GHG priority-setting.  
41 It is an issue that implementing organizations, especially smaller local organizations,  
42 who have the closest relationship with target populations, have little to no say in how  
43 resources are distributed in GHG under the RAM. GHG under the RAM can only lead to  
44 equitable health outcomes if and only if major funding organizations have a joint  
45 commitment towards the same goals of health equity and justice. If funders set priorities  
46 that is grounded on equity and justice, then it would be good for all actors to adhere to  
47 the RAM and seek funding by aligning their priorities with funder priorities. In this  
48 situation, all actors' individual goals will be aligned with the funding organizations' goals  
49 of equity and justice. These findings are aligned with current literature discussing how  
50 "philantroc capitalists" and large funders have an outsized influence on global health  
51 agenda-setting even without having an ethical framework for decision-making.[48,49]  
52  
53  
54  
55  
56  
57  
58  
59  
60

1  
2  
3 Our paper complements the current research on agenda-setting in global health, which  
4 discusses how agenda-setting is not purely a rational deliberation of evidence but the  
5 convergence of problems, solutions, and political developments.[50] This study attempts  
6 to deepen the understanding power's manifestation and influence in agenda-setting  
7 through the lens of stated and revealed priorities.  
8

9 The priorities of funders of HIV/AIDS, child health, and maternal health have been  
10 prioritized from 2016-2020. While we have seen improvements in these three areas, the  
11 existence of significant and severe preventable health inequalities demonstrates that  
12 this prioritization architecture does not necessarily promote equity and justice in global  
13 health. Additionally, other core health issues such as horizontal health system  
14 improvements were not found to be prioritized which may have affected the persistence  
15 of health inequities. We have empirical evidence supporting the arguments that current  
16 GHG operates under the RAM, and existing power asymmetries limit the range of  
17 choice for health policies and programs that aim to reduce inequities.  
18  
19

20 **Acknowledgements:** We thank participants in the Harvard Law School Global Justice  
21 Workshop for helpful comments on an earlier version of this work.  
22

23 **Author contributions:** G.F.B and J.J.P. made substantial contributions to the  
24 conception and design of the study, J.J.P supervised the research planning, analysis  
25 and execution and interpretation of data and analysis and G.F.B. conducted the  
26 analyses, G.F.B prepared the manuscript draft with J.J.P.'s critical input and revisions  
27 for important intellectual content, G.F.B. and J.J.P approved the final manuscript version  
28 to be published. J.J.P obtained funding, G.F.B and J.J.P agree to be accountable for all  
29 aspects of the work.  
30

31 **Funding Statement:** This work was supported by the Health Equity and Policy Lab  
32 (HEPL) at the University of Pennsylvania. We acknowledge funding, in part, by the Vice  
33 Provost for Research University Research Foundation at the University of Pennsylvania.  
34

35 **Competing interests:** No author has competing interests to declare.  
36

37 **Ethics approval:** The study did not have any human or animal participants.  
38 Additionally, the study did not require ethical approval as the Twitter data used were  
39 already in the public domain.  
40

41 **Data and materials availability:** Under the "Content Redistribution" section of Twitter's  
42 Developer Agreement and Policy, "We restrict the redistribution of Twitter Content to  
43 third parties. If you provide Twitter Content to third parties, including downloadable  
44 datasets or via an API, you may only distribute Tweet IDs, Direct Message IDs, and/or  
45 User IDs." Because the data collected using the Twitter API does not allow for  
46 redistribution under the Twitter Developer Agreement and Policy, tweets cannot be  
47 made publicly available. Only Tweet ID's and User ID's are allowed to be redistributed  
48 according to the Twitter policy. Please email [jenpr@upenn.edu](mailto:jenpr@upenn.edu) if you wish to receive a  
49 copy of the Tweet ID's and User ID's of the data and/or the code used in the study. The  
50 IHME DAH Database can be found at [http://ghdx.healthdata.org/record/ihme-](http://ghdx.healthdata.org/record/ihme-data/development-assistance-health-database-1990-2019)  
51 [data/development-assistance-health-database-1990-2019](http://ghdx.healthdata.org/record/ihme-data/development-assistance-health-database-1990-2019)  
52  
53

## 54 **FIGURE LEGENDS**

55  
56  
57  
58  
59  
60

**Figure 1. Network Analysis of Revealed Priorities from Tweets.** Line thickness represents how many similar priorities one global health actor has with another. Font size of global health priorities represent the number of organizations have it as a priority. Data used found in Supplementary Table 4.

**Figure 2. Network Analysis of Revealed Priorities from Funding for DAH (2019).** Line thickness represents the amount of funding for health that was transferred between two actors. Font size represents the total amount of funding for health donated or received in 2019.

## REFERENCES

- 1 Ng NY, Ruger JP. Global Health Governance at a Crossroads. *Global health governance : the scholarly journal for the new health security paradigm* 2011;**3**.
- 2 Giaimo S. Interest Groups, Think Tanks, and Health Care Policy (1960s-Present). In: *Guide to U.S. Health and Health Care Policy*. Thousand Oaks CA: : SAGE Publications 2014. 375–92.
- 3 Spicer N, Agyepong I, Ottersen T, *et al*. 'It's far too complicated': why fragmentation persists in global health. *Globalization and Health* 2020;**16**. doi:10.1186/s12992-020-00592-1
- 4 Szlezák NA, Bloom BR, Jamison DT, *et al*. The Global Health System: Actors, Norms, and Expectations in Transition. *PLoS Medicine* 2010;**7**. doi:10.1371/journal.pmed.1000183
- 5 United Kingdom House of Lords. Chapter 3: International health: the institutional labyrinth. Select Committee on Intergovernmental Organisations First Report. 2008.
- 6 Ottersen OP, Dasgupta J, Blouin C, *et al*. The political origins of health inequity: Prospects for change. *The Lancet*. 2014;**383**. doi:10.1016/S0140-6736(13)62407-1
- 7 Walt G. Global cooperation in international public health. In: Merson M, Black R, Mills A, eds. *International Public Health*. Gaithersburg, Maryland: : Aspen Publishers 2001.
- 8 Mayhew SH, Walt G, Lush L, *et al*. Donor Agencies' Involvement in Reproductive Health: Saying One Thing and Doing Another? *International Journal of Health Services* 2005;**35**. doi:10.2190/K46B-RRXJ-95M4-JDQU
- 9 Burris S. Governance, Microgovernance and Health. *Temple Law Review* 2004;**77**:335–62.
- 10 Brooks A, Cutts FT, Walt G. Policy study of factors influencing the adoption of new and underutilized vaccines in developing countries. Washington D.C.: 1999.
- 11 Travis P, Bennett S, Haines A, *et al*. Overcoming health-systems constraints to achieve the Millennium Development Goals. *The Lancet* 2004;**364**. doi:10.1016/S0140-6736(04)16987-0
- 12 Hoffman SJ, Røttingen J-A. Dark sides of the proposed Framework Convention on Global Health's many virtues: A systematic review and critical analysis. *Health and Human Rights* 2013;**15**:117–34.
- 13 Ruger JP. Global health governance as shared health governance. *Journal of Epidemiology and Community Health* 2012;**66**. doi:10.1136/jech.2009.101097



- 1  
2  
3 14 Frenk J, Moon S. Governance Challenges in Global Health. *New England Journal of Medicine* 2013;**368**.  
4 doi:10.1056/NEJMra1109339  
5
- 6 15 Hoffman SJ, Cole CB. Defining the global health system and systematically mapping its network of actors.  
7 *Globalization and Health* 2018;**14**. doi:10.1186/s12992-018-0340-2  
8
- 9 16 Institute for Health Metrics and Evaluation (IHME). Development Assistance for Health Database 1990-  
10 2019. *Institute for Health Metrics and Evaluation (IHME)* 2020.  
11
- 12 17 Lopreite M, Puliga M, Riccaboni M, *et al*. A social network analysis of the organizations focusing on  
13 tuberculosis, malaria and pneumonia. *Social Science and Medicine* 2021;**278**.  
14 doi:10.1016/j.socscimed.2021.113940  
15
- 16 18 Quissell K, Berlan D, Shiffman J, *et al*. Explaining global network emergence and nonemergence:  
17 Comparing the processes of network formation for tuberculosis and pneumonia. *Public Administration*  
18 *and Development* 2018;**38**. doi:10.1002/pad.1836  
19
- 20 19 Hevey D. Network analysis: A brief overview and tutorial. *Health Psychology and Behavioral Medicine*  
21 2018;**6**. doi:10.1080/21642850.2018.1521283  
22
- 23 20 Ryan RM, Deci EL. Self-determination theory and the facilitation of intrinsic motivation, social  
24 development, and well-being. *American Psychologist* 2000;**55**. doi:10.1037/0003-066X.55.1.68  
25
- 26 21 Donelle L, Booth R. Health Tweets: An Exploration of Health Promotion on Twitter. *American Nurses*  
27 *Association* 2012;**17**.  
28
- 29 22 Park H, Rodgers S, Stemmler J. Analyzing Health Organizations' Use of Twitter for Promoting Health  
30 Literacy. *Journal of Health Communication* 2013;**18**. doi:10.1080/10810730.2012.727956  
31
- 32 23 Glazer A, Konrad K. A Signaling Explanation for Charity. *American Economic Review* 1996;**86**:1019–28.  
33
- 34 24 Harbaugh W. The Prestige Motive for Making Charitable Transfers. *American Economic Review*  
35 1998;**88**:227–82.  
36
- 37 25 Fung IC-H, Jackson AM, Ahweyevu JO, *et al*. #Globalhealth Twitter Conversations on #Malaria, #HIV, #TB,  
38 #NCDS, and #NTDS: a Cross-Sectional Analysis. *Annals of Global Health* 2017;**83**.  
39 doi:10.1016/j.aogh.2017.09.006  
40
- 41 26 Goff DA, Kullar R, Laxminarayan R, *et al*. Twitter to engage, educate, and advocate for global antibiotic  
42 stewardship and antimicrobial resistance. *The Lancet Infectious Diseases* 2019;**19**. doi:10.1016/S1473-  
43 3099(19)30058-1  
44
- 45 27 Guidry JPD, Jin Y, Orr CA, *et al*. Ebola on Instagram and Twitter: How health organizations address the  
46 health crisis in their social media engagement. *Public Relations Review* 2017;**43**.  
47 doi:10.1016/j.pubrev.2017.04.009  
48
- 49 28 Scanfeld D, Scanfeld V, Larson EL. Dissemination of health information through social networks: Twitter  
50 and antibiotics. *American Journal of Infection Control* 2010;**38**. doi:10.1016/j.ajic.2009.11.004  
51
- 52 29 Zamora A. Making Room For Big Data: Web Scraping and an Affirmative Right to Access Publicly  
53 Available Information Online. *Journal of Business, Entrepreneurship & the Law* 2019;**12**:203–28.  
54  
55  
56  
57  
58  
59

- 1  
2  
3 30 Alvarez-Melis D, Saveski M. Topic Modeling in Twitter: Aggregating Tweets by Conversations. *Tenth International AAI Conference on Web and Social Media* 2016.
- 4  
5  
6 31 Hong L, Davison BD. Empirical study of topic modeling in Twitter. In: *Proceedings of the First Workshop on Social Media Analytics - SOMA '10*. New York, New York, USA: : ACM Press 2010.  
7  
8 doi:10.1145/1964858.1964870  
9
- 10 32 Yang S-H, Kolcz A, Schlaikjer A, et al. Large-scale high-precision topic modeling on twitter. In:  
11 *Proceedings of the 20th ACM SIGKDD international conference on Knowledge discovery and data mining*  
12 *- KDD '14*. New York, New York, USA: : ACM Press 2014. doi:10.1145/2623330.2623336  
13  
14
- 15 33 Bakshi RK, Kaur N, Kaur R, et al. Opinion mining and sentiment analysis. *2016 3rd International*  
16 *Conference on Computing for Sustainable Global Development (INDIACom)* 2016;:452–5.  
17
- 18 34 Pak A, Paroubek P. Twitter as a Corpus for Sentiment Analysis and Opinion Mining. *LREc* 2010;**10**:1320–  
19 6.  
20
- 21 35 Saif H, He Y, Alani H. Semantic Sentiment Analysis of Twitter. 2012. doi:10.1007/978-3-642-35176-1\_32  
22
- 23 36 Blei DM, Ng AY, Jordan MI. Latent Dirichlet allocation. *Journal of Machine Learning Research* 2003;**3**.  
24 doi:10.1016/b978-0-12-411519-4.00006-9  
25
- 26 37 Mintz A, DeRouen K. The Rational Actor Model. In: *Understanding Foreign Policy Decision Making*.  
27 Cambridge: : Cambridge University Press 2010. 57–68.  
28
- 29 38 MacDonald PK. Useful Fiction or Miracle Maker: The Competing Epistemological Foundations of Rational  
30 Choice Theory. *American Political Science Review* 2003;**97**. doi:10.1017/S000305540300087X  
31
- 32 39 Shiffman J. Knowledge, moral claims and the exercise of power in global health. *International Journal of*  
33 *Health Policy and Management* 2014;**3**. doi:10.15171/ijhpm.2014.120  
34
- 35 40 Dahl RA. The concept of power. *Behavioral Science* 2007;**2**. doi:10.1002/bs.3830020303  
36
- 37 41 Barnett M, Duvall R. Power in International Politics. *International Organization* 2005;**59**.  
38 doi:10.1017/S0020818305050010  
39
- 40 42 Shawar YR, Ruger JP. The Politics of Global Health Inequalities: Approaches to Studying the Role of  
41 Power. In: McInnes C, Lee K, Youde J, eds. *The Oxford Handbook of Global Health Politics*. Oxford: 2020.  
42 59–76.  
43
- 44 43 Holmes SM. Structural Vulnerability and Hierarchies of Ethnicity and Citizenship on the Farm. *Medical*  
45 *Anthropology* 2011;**30**. doi:10.1080/01459740.2011.576728  
46
- 47 44 Goldade K. “Health Is Hard Here” or “Health for All”? *Medical Anthropology Quarterly* 2009;**23**.  
48 doi:10.1111/j.1548-1387.2009.01074.x  
49
- 50 45 Sridhar D. Who Sets the Global Health Research Agenda? The Challenge of Multi-Bi Financing. *PLoS*  
51 *Medicine* 2012;**9**. doi:10.1371/journal.pmed.1001312  
52
- 53 46 Usaid.gov. 2021. Global Health. [online] Available at: <<https://www.usaid.gov/global-health>> [Accessed  
54 1 November 2021].  
55  
56  
57  
58  
59  
60



- 1  
2  
3 47 Usaid.gov. 2021. Health Areas. [online] Available at: <[https://www.usaid.gov/global-health/health-](https://www.usaid.gov/global-health/health-areas)  
4 areas> [Accessed 1 November 2021].  
5  
6 48 Birn A-E. Philanthrocapitalism Past and Present: The Rockefeller Foundation, the Gates Foundation and  
7 the Setting(s) of the International/Global Health Agenda. *Hypothesis* 2014;**12**.  
8  
9 49 McGoey L. Philanthrocapitalism and its critics. *Poetics* 2012;**40**. doi:10.1016/j.poetic.2012.02.006  
10  
11 50 Shiffman J. Agenda Setting in Public Health Policy. In: *International Encyclopedia of Public Health*. 2016.  
12 doi:10.1016/B978-0-12-803678-5.00007-2  
13  
14  
15  
16  
17  
18  
19  
20  
21  
22  
23  
24  
25  
26  
27  
28  
29  
30  
31  
32  
33  
34  
35  
36  
37  
38  
39  
40  
41  
42  
43  
44  
45  
46  
47  
48  
49  
50  
51  
52  
53  
54  
55  
56  
57  
58  
59  
60

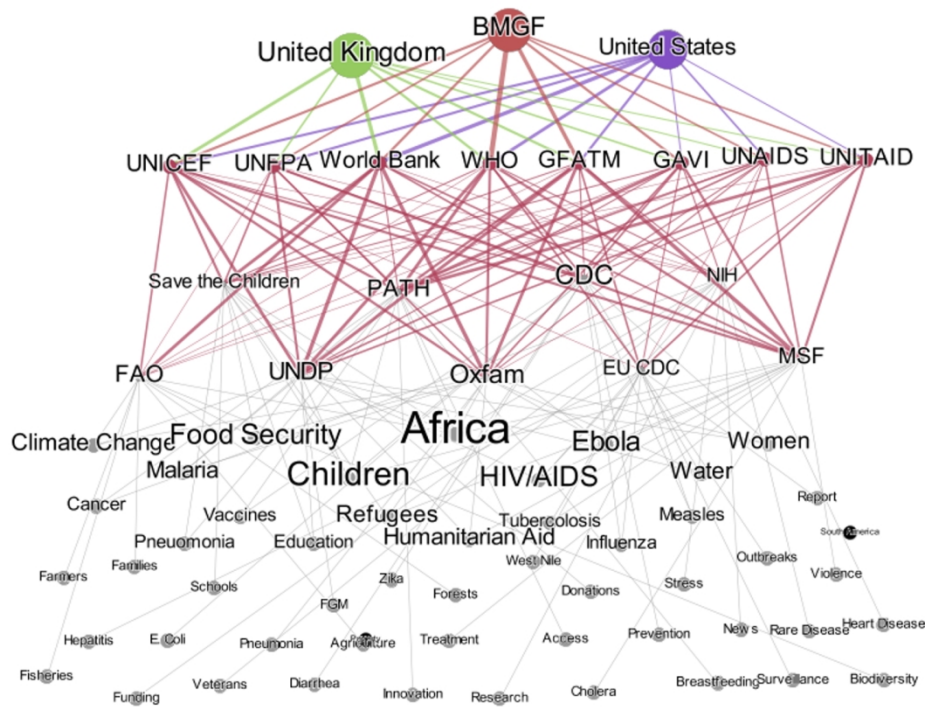

Figure 1. Network Analysis of Revealed Priorities from Tweets. Line thickness represents how many similar priorities one global health actor has with another. Font size of global health priorities represent the number of organizations have it as a priority. Data used found in Supplementary Table 4.

282x210mm (144 x 144 DPI)

1  
2  
3  
4  
5  
6  
7  
8  
9  
10  
11  
12  
13  
14  
15  
16  
17  
18  
19  
20  
21  
22  
23  
24  
25  
26  
27  
28  
29  
30  
31  
32  
33  
34  
35  
36  
37  
38  
39  
40  
41  
42  
43  
44  
45  
46  
47  
48  
49  
50  
51  
52  
53  
54  
55  
56  
57  
58  
59  
60

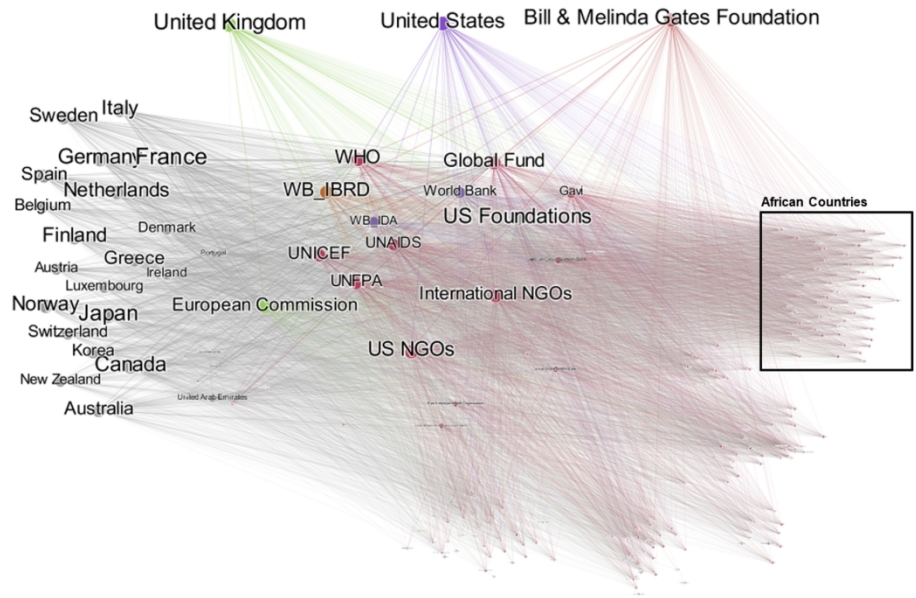

Figure 2. Network Analysis of Revealed Priorities from Funding for DAH (2019). Line thickness represents the amount of funding for health that was transferred between two actors. Font size represents the total amount of funding for health donated or received in 2019.

366x230mm (144 x 144 DPI)

Supplemental Material

**Supplementary Table 1. Evidence and Testing RAM by Actor.** Evidence for stated and revealed priorities and testing of RAM for each actor and the global health system as a whole. Light red indicates funding organization, blue indicates channel of DAH, yellow indicates implementing institution, and dark red indicates global health system as a whole.

|         | Evidence                                                                                                                                                                                                                                                                                                                                                                                                                                                                                                                                                                                                                                                                                                                                                                                                                                                                                                                                                                                                                                                                                                                                                                                                     |                                                                                                                                                                                                                                                                                                                                                                                                                                                                                                                                                                                                                                                                                                                                                                                                                                                                                                                                                                                                                                        |                                                                                                                                                                                                                        | Testing Assumptions of RAM                                                                                                                                                                                     |                                                                                                   |                                                                                                                                                                                                                                       | Operates under RAM? |
|---------|--------------------------------------------------------------------------------------------------------------------------------------------------------------------------------------------------------------------------------------------------------------------------------------------------------------------------------------------------------------------------------------------------------------------------------------------------------------------------------------------------------------------------------------------------------------------------------------------------------------------------------------------------------------------------------------------------------------------------------------------------------------------------------------------------------------------------------------------------------------------------------------------------------------------------------------------------------------------------------------------------------------------------------------------------------------------------------------------------------------------------------------------------------------------------------------------------------------|----------------------------------------------------------------------------------------------------------------------------------------------------------------------------------------------------------------------------------------------------------------------------------------------------------------------------------------------------------------------------------------------------------------------------------------------------------------------------------------------------------------------------------------------------------------------------------------------------------------------------------------------------------------------------------------------------------------------------------------------------------------------------------------------------------------------------------------------------------------------------------------------------------------------------------------------------------------------------------------------------------------------------------------|------------------------------------------------------------------------------------------------------------------------------------------------------------------------------------------------------------------------|----------------------------------------------------------------------------------------------------------------------------------------------------------------------------------------------------------------|---------------------------------------------------------------------------------------------------|---------------------------------------------------------------------------------------------------------------------------------------------------------------------------------------------------------------------------------------|---------------------|
|         | Stated Priorities from Policy Documents                                                                                                                                                                                                                                                                                                                                                                                                                                                                                                                                                                                                                                                                                                                                                                                                                                                                                                                                                                                                                                                                                                                                                                      | Revealed Priorities from DAH Data                                                                                                                                                                                                                                                                                                                                                                                                                                                                                                                                                                                                                                                                                                                                                                                                                                                                                                                                                                                                      | Revealed Priorities from Tweets                                                                                                                                                                                        | Pre-determined goal?                                                                                                                                                                                           | Consistent preferences?                                                                           | Utility maximizing?                                                                                                                                                                                                                   |                     |
| USAID   | <p>“On behalf of the American people, we promote and demonstrate democratic values abroad, and advance a free, peaceful, and prosperous world. <b>In support of America’s foreign policy</b>, the U.S. Agency for International Development leads the U.S. Government’s international development and disaster assistance through partnerships and investments that save lives, reduce poverty, strengthen democratic governance, and help people emerge from humanitarian crises and progress beyond assistance.” (<a href="#">2019 USAID Financial Report</a>)</p> <p>“For over 50 years, USAID’s global health programs have saved lives, protected people most vulnerable to disease, and promoted the stability of communities and nations, while advancing American security and prosperity. <b>America is safer and stronger when people can live healthy and productive lives and when nations around the world are self-reliant and resilient.</b>” (<a href="#">USAID Website</a>)</p> <p><b>Health Focus Area</b> (<a href="#">USAID Website</a>)</p> <ul style="list-style-type: none"> <li>• Child and maternal death</li> <li>• HIV/AIDS</li> <li>• Malaria</li> <li>• Tuberculosis</li> </ul> | <p><b>Health Focus Area</b><br/>49.0% of 2019 US DAH (\$6.0 billion) supported <b>HIV/AIDS</b>; 7.0% (\$862.5 million) supported <b>malaria</b>; 11.4% (\$1.4 billion) was disbursed for <b>child health</b>, and 10.8% (\$1.3 billion) went to <b>maternal health</b>.</p> <p><b>Region</b><br/>In 2017, the most recent year for which regional DAH estimates are available, the US directed much of its resources to <b>sub-Saharan Africa</b>, sending 50.5%, or \$6.9 billion, of 2017 DAH.</p> <p><b>Channel</b><br/>The US provided 59.2% of its funding in 2019 through its own bilateral agencies, including the United States Agency for International Development (<b>USAID</b>), the President’s Malaria Initiative (<b>PMI</b>), and <b>PEPFAR</b>. <b>UN agencies</b> received 6.2% of US DAH in 2019, or \$761.4 million. <b>Gavi</b> received \$307.0 million, up 9.0% from 2018, and the <b>Global Fund</b> received \$636.5 million, down 25.8%. <b>NGOs</b> received 26.8% of US DAH in 2019, or \$3.3 billion.</p> | <p><b>Topics from 2016-2020 tweets</b> (<a href="#">no order</a>)</p> <p>Africa<br/>Children<br/>Education<br/>Food Security<br/>HIV/AIDS<br/>Humanitarian Aid<br/>Mothers<br/>South America<br/>Water<br/>Women</p>   | <p>National security<br/>National interests</p> <p>Global health focus:<br/>Child and maternal health, HIV/AIDS, malaria, tuberculosis</p>                                                                     | <p>HIV/AIDS, child and maternal health, and Africa are consistent across DAH data and tweets</p>  | <p>HIV/AIDS, child and maternal health are consistent across stated and revealed priorities.</p> <p>To maximize benefits for national security and interests, USAID prioritizes HIV/AIDS and child and maternal health in Africa.</p> | Yes                 |
| UK DFID | <p><b>“We pursue our national interests and project the UK as a force for good in the world.</b> We promote the interests of British citizens, safeguard the UK’s security, defend our values, reduce poverty and tackle global challenges with our international partners.” (<a href="#">UK FCDO, formerly DFID website</a>)</p> <p>“We are responsible for:</p> <ol style="list-style-type: none"> <li>1. honouring the UK’s international commitments and taking</li> </ol>                                                                                                                                                                                                                                                                                                                                                                                                                                                                                                                                                                                                                                                                                                                               | <p><b>Health Focus Area</b><br/><b>Reproductive, maternal, newborn, and child health</b> was the focus of \$1.4 billion (38.5%) of the UK’s DAH in 2019, followed by <b>HIV/AIDS</b> with \$553.9 million (15.8%).</p> <p><b>Region</b><br/>By GBD super-regions, the UK contributed \$1.3 billion, or 37.3% of its 2017 DAH, to <b>sub-</b></p>                                                                                                                                                                                                                                                                                                                                                                                                                                                                                                                                                                                                                                                                                       | <p><b>Topics from 2016-2020 tweets</b> (<a href="#">no order</a>)</p> <p>Africa<br/>Agriculture<br/>Children<br/>Development<br/>Ebola<br/>Education<br/>Food Security<br/>HIV/AIDS<br/>Humanitarian Aid<br/>Water</p> | <p>National interests<br/>National security</p> <p>Global peace, security, and governance; Crisis response and resilience; Global prosperity; Extreme poverty and helping most vulnerable; Value for money</p> | <p>Child and maternal health, HIV/AIDS, and Africa are consistent across DAH data and tweets.</p> | <p>Child and maternal health, HIV/AIDS, and Africa are consistent across stated and revealed priorities.</p> <p>To maximize benefits for national security and interests, UK DFID prioritizes child and maternal</p>                  | Yes                 |

|      |                                                                                                                                                                                                                                                                                                                                                                                                                                                                                                                                                                                                                                                                                                                                                                                                                                                                                                                                                                                                                                                                               |                                                                                                                                                                                                                                                                                                                                                                                                                                                                                                                                                      |                                                                                                                                                                                                     |                                                                                                                                                                                                           |                                                                                                                                                          |                                                                                                                       |     |
|------|-------------------------------------------------------------------------------------------------------------------------------------------------------------------------------------------------------------------------------------------------------------------------------------------------------------------------------------------------------------------------------------------------------------------------------------------------------------------------------------------------------------------------------------------------------------------------------------------------------------------------------------------------------------------------------------------------------------------------------------------------------------------------------------------------------------------------------------------------------------------------------------------------------------------------------------------------------------------------------------------------------------------------------------------------------------------------------|------------------------------------------------------------------------------------------------------------------------------------------------------------------------------------------------------------------------------------------------------------------------------------------------------------------------------------------------------------------------------------------------------------------------------------------------------------------------------------------------------------------------------------------------------|-----------------------------------------------------------------------------------------------------------------------------------------------------------------------------------------------------|-----------------------------------------------------------------------------------------------------------------------------------------------------------------------------------------------------------|----------------------------------------------------------------------------------------------------------------------------------------------------------|-----------------------------------------------------------------------------------------------------------------------|-----|
|      | <p>action to achieve the <b>United Nations' Global Goals</b> making British aid more effective by improving transparency, openness and value for money</p> <p>2. targeting British international development policy on economic growth and wealth creation</p> <p>3. improving the coherence and performance of British international development policy in <b>fragile and conflict-affected countries</b></p> <p>4. improving the lives of <b>girls and women</b> through better education and a greater choice on <b>family planning</b> preventing <b>violence against girls and women</b> in the developing world</p> <p>5. helping to prevent climate change and encouraging adaptation and low-carbon growth in developing countries</p> <p>6. strengthening global peace, security and governance</p> <p>7. <b>strengthening resilience and response to crisis</b></p> <p>8. promoting global prosperity</p> <p>9. tackling extreme poverty and <b>helping the world's most vulnerable</b> delivering value for money"</p> <p><a href="#">(UK DFID About Page)</a></p> | <p><b>Saharan Africa;</b> \$301.0 million (8.7%) to South Asia; \$163.9 million (4.7%) to Southeast Asia, East Asia, and Oceania; \$237.9 million (6.9%) to North Africa and the Middle East; and \$41.0 million (1.2%) to Central Europe, Eastern Europe, and Central Asia.</p> <p><u>Channel</u><br/>Of the UK's 2019 DAH, \$990.3 million (28.2%) was channeled to <b>UK bilateral agencies;</b> \$524.6 million (14.9%) to <b>UN agencies;</b> \$306.4 million (8.7%) to <b>Gavi;</b> and \$817.1 million (23.3%) to the <b>Global Fund.</b></p> |                                                                                                                                                                                                     |                                                                                                                                                                                                           | health and HIV/AIDS in Africa.                                                                                                                           |                                                                                                                       |     |
| BMGF | <p><b>"Strategic Investments.</b> We partner with entrepreneurs, companies, and other organizations to create incentives that <b>harness the power of private enterprise to create change for those who need it most.</b>" (<a href="#">BMGF: how we work</a>)</p> <p><b>Global development.</b> "Our Global Development Division focuses on improving the delivery of <b>high-impact health</b></p>                                                                                                                                                                                                                                                                                                                                                                                                                                                                                                                                                                                                                                                                          | <p><u>Health Focus Area</u><br/>In 2019, the Gates Foundation directed \$1.5 billion, or 38.3%, of its DAH to <b>reproductive, maternal, newborn, and child health;</b> \$709.3 million, or 18.1%, to <b>HIV/AIDS;</b> \$303.9 million, or 7.8% to <b>malaria;</b> \$237.6 million, or 6.1%, to</p>                                                                                                                                                                                                                                                  | <p><u>Topics from 2016-2020 tweets</u><br/><u>(no order)</u></p> <p>Africa<br/>Breastfeeding<br/>Children<br/>Education<br/>HIV/AIDS<br/>Malaria<br/>Mothers<br/>Polio<br/>Sanitation<br/>Women</p> | <p>Strategic investments -- private enterprise solutions for most disadvantaged;</p> <p>High-impact health products and services to world's poorest</p> <p>Stated global development areas: Emergency</p> | <p>Child and maternal health, HIV/AIDS, malaria, and Africa are consistent across DAH data and tweets.</p> <p>To maximize returns of their strategic</p> | <p>Child and maternal health, HIV/AIDS, malaria, and Africa are consistent across stated and revealed priorities.</p> | Yes |

|            |                                                                                                                                                                                                                                                                                                                                                                                                                                                                                                                                                                                                                                                                                                                                                                                                                                                                                                                                                                                                                                                                                                                                                                                                                                                                                                                                                                                                |                                                                                                                                                                                                                                                                                                                                                                                                                                                                                                                                                                                                                                                                                                                                                                                                      |                                                                                                                                                                                                                                                                                                                                            |                                                                                                                                                                                                                                                                                                                                                                                                                                                                                                               |                                                                                                                  |                                                                                                                                                                                                                                                                                                |            |
|------------|------------------------------------------------------------------------------------------------------------------------------------------------------------------------------------------------------------------------------------------------------------------------------------------------------------------------------------------------------------------------------------------------------------------------------------------------------------------------------------------------------------------------------------------------------------------------------------------------------------------------------------------------------------------------------------------------------------------------------------------------------------------------------------------------------------------------------------------------------------------------------------------------------------------------------------------------------------------------------------------------------------------------------------------------------------------------------------------------------------------------------------------------------------------------------------------------------------------------------------------------------------------------------------------------------------------------------------------------------------------------------------------------|------------------------------------------------------------------------------------------------------------------------------------------------------------------------------------------------------------------------------------------------------------------------------------------------------------------------------------------------------------------------------------------------------------------------------------------------------------------------------------------------------------------------------------------------------------------------------------------------------------------------------------------------------------------------------------------------------------------------------------------------------------------------------------------------------|--------------------------------------------------------------------------------------------------------------------------------------------------------------------------------------------------------------------------------------------------------------------------------------------------------------------------------------------|---------------------------------------------------------------------------------------------------------------------------------------------------------------------------------------------------------------------------------------------------------------------------------------------------------------------------------------------------------------------------------------------------------------------------------------------------------------------------------------------------------------|------------------------------------------------------------------------------------------------------------------|------------------------------------------------------------------------------------------------------------------------------------------------------------------------------------------------------------------------------------------------------------------------------------------------|------------|
|            | <p><b>products and services</b> to the world's poorest communities and helps countries expand access to health coverage.<br/> <b>Areas:</b> Emergency Response, Family Planning, Global Delivery Programs, Global Libraries, Maternal, Newborn &amp; Child Health, Nutrition, Polio" (<a href="#">BMGF: our work</a>)</p> <p><b>Global health.</b> "Our Global Health Division aims to <b>reduce inequities in health</b> by developing new tools and strategies to reduce the <b>burden of infectious disease</b> and the <b>leading causes of child mortality</b> in developing countries.</p> <p><b>Areas:</b> Discovery &amp; Translational Sciences, Enteric and Diarrheal Diseases, HIV, Innovative Technology Solutions, Institute for Disease Modeling, Integrated Development, Malaria, Maternal, Newborn &amp; Child Health, Discovery &amp; Tools, Neglected Tropical Diseases, Pneumonia Tuberculosis, Vaccine Development and Surveillance" (<a href="#">BMGF: our work</a>)</p>                                                                                                                                                                                                                                                                                                                                                                                                  | <p><b>tuberculosis;</b> \$266.5 million, or 6.8%, to <b>health systems strengthening;</b> and \$72.4 million, or 1.9%, to <b>non-communicable diseases.</b></p> <p><u>Region</u><br/>                 In 2017, the Foundation provided 41% of its DAH to <b>global recipients</b> and programs and 18% to <b>sub-Saharan Africa.</b></p> <p><u>Channel</u><br/>                 The Gates Foundation's 2019 DAH total of \$3.9 billion was an increase of 9.9% from 2018. Of this, \$2.5 billion or 64.0% was channeled through the Gates Foundation <b>directly to implementing institutions.</b> In 2019, \$266.8 million (7%) in Gates Foundation DAH went to <b>UN agencies,</b> \$256.9 million (7%) went to the <b>Global Fund,</b> and \$406.1 million (10%) was directed to <b>Gavi.</b></p> |                                                                                                                                                                                                                                                                                                                                            | <p>Response, Family Planning, Global Delivery Programs, Global Libraries, Maternal, Newborn &amp; Child Health, Nutrition, Polio</p> <p>Stated global health areas: Discovery &amp; Translational Sciences, Enteric and Diarrheal Diseases, HIV, Innovative Technology Solutions, Institute for Disease Modeling, Integrated Development, Malaria, Maternal, Newborn &amp; Child Health, Discovery &amp; Tools, Neglected Tropical Diseases, Pneumonia Tuberculosis, Vaccine Development and Surveillance</p> |                                                                                                                  | <p>investments, BMGF prioritizes child and maternal health, HIV/AIDS, and malaria in Africa.</p>                                                                                                                                                                                               |            |
| <p>WHO</p> | <p><b>"Health for all.</b> Ensuring universal health coverage without impoverishment is the foundation for achieving the health objectives of the Sustainable Development Goals – because when people are healthy, their families, communities and countries benefit. Our top priority must be to support national health authorities' efforts to strengthen all the building blocks of health systems and to enact policies aimed at ensuring health care is equitable and affordable for all.</p> <p><b>Health emergencies.</b> In today's interconnected world, public health emergencies can affect anyone, anywhere – and the Ebola crisis in West Africa showed us the dangers of being unprepared. The development of resilient and robust global and local health systems capable of preventing, monitoring, detecting and responding to public health emergencies must therefore be a key priority, closely linked to our efforts to achieve universal health coverage.</p> <p><b>Women, children and adolescents.</b> We cannot achieve the ambitious health and development targets in the Sustainable Development Goals unless we secure the health, dignity and rights of women, children and adolescents. Yet, in too many places, gender gaps, harmful cultural and social practices and gender-based violence are negatively impacting these individuals. Because of that,</p> | <p><u>Health Focus Area</u><br/>                 WHO provided \$2.5 billion of DAH in 2019, down 1.2% from 2018. Of this, \$630.7 million or 24.9% was disbursed to other <b>infectious diseases</b> and \$1.0 billion or 39.8% to <b>health systems strengthening.</b></p> <p><u>Region</u><br/>                 DAH data for the WHO in 2019 have unallocated or unspecified regions.</p>                                                                                                                                                                                                                                                                                                                                                                                                          | <p><u>Topics from 2016-2020 tweets (no order)</u></p> <p>Africa<br/>                 Breastfeeding<br/>                 Children<br/>                 Ebola<br/>                 HIV/AIDS<br/>                 Malaria<br/>                 Measles<br/>                 Mothers<br/>                 Polio<br/>                 Women</p> | <p>Universal health coverage, health systems strengthening, health equity, health emergencies, infectious diseases, maternal and child health, gender equity, climate and environmental impacts on health, improved WHO governance</p>                                                                                                                                                                                                                                                                        | <p>Infectious diseases (ebola, HIV/AIDS, malaria, measles, polio) are consistent across DAH data and tweets.</p> | <p>Infectious diseases (ebola, HIV/AIDS, malaria, measles, polio) are consistent across stated and revealed priorities. To maximize the benefits of their pre-determined goal of health for all, WHO prioritizes on infectious diseases like Ebola, HIV/AIDS, malaria, measles, and polio.</p> | <p>Yes</p> |

|            |                                                                                                                                                                                                                                                                                                                                                                                                                                                                                                                                                                                                                                                                                                                                                                                                                                                                                                                                                                                                                                                                                                                                                                                                                                                                                                    |                                                                                                                                                                                                                                                                                                                                                                                                                                                                                                                                                                                                                                                                                                                                                                                   |                                                                                                                                                                                                           |                                                                                                                                                                                                                                                                       |                                                                                                                                                                                                                                                                                                                                                                                        |     |
|------------|----------------------------------------------------------------------------------------------------------------------------------------------------------------------------------------------------------------------------------------------------------------------------------------------------------------------------------------------------------------------------------------------------------------------------------------------------------------------------------------------------------------------------------------------------------------------------------------------------------------------------------------------------------------------------------------------------------------------------------------------------------------------------------------------------------------------------------------------------------------------------------------------------------------------------------------------------------------------------------------------------------------------------------------------------------------------------------------------------------------------------------------------------------------------------------------------------------------------------------------------------------------------------------------------------|-----------------------------------------------------------------------------------------------------------------------------------------------------------------------------------------------------------------------------------------------------------------------------------------------------------------------------------------------------------------------------------------------------------------------------------------------------------------------------------------------------------------------------------------------------------------------------------------------------------------------------------------------------------------------------------------------------------------------------------------------------------------------------------|-----------------------------------------------------------------------------------------------------------------------------------------------------------------------------------------------------------|-----------------------------------------------------------------------------------------------------------------------------------------------------------------------------------------------------------------------------------------------------------------------|----------------------------------------------------------------------------------------------------------------------------------------------------------------------------------------------------------------------------------------------------------------------------------------------------------------------------------------------------------------------------------------|-----|
|            | <p>we must put the well-being of women, children and adolescents at the centre of global health and development.</p> <p><b>The health impacts of climate and environmental change.</b> Climate and environmental change impact many aspects of life that are inextricably linked to health – food security, economic livelihoods, air safety and water and sanitation systems – and WHO estimates that 12.6 million people die each year as a result of living or working in an unhealthy environment. To address this, WHO has a key role to play advancing both mitigation and adaptation strategies for climate and environmental change, working in close partnership with other UN agencies and stakeholders.</p> <p><b>A transformed WHO.</b> Building WHO into a more effective, transparent and accountable agency will require striking a balance between bold reform and stability of the organization. To meet the evolving needs and challenges of the 21st century and deliver game-changing, sustainable results, WHO will need to focus its work where it has the most value, broaden and intensify its engagement across stakeholders, attract more predictable, flexible financing, and work to identify and retain the best global talent.” (<a href="#">WHO Priorities</a>)</p> |                                                                                                                                                                                                                                                                                                                                                                                                                                                                                                                                                                                                                                                                                                                                                                                   |                                                                                                                                                                                                           |                                                                                                                                                                                                                                                                       |                                                                                                                                                                                                                                                                                                                                                                                        |     |
| World Bank | <p>“The World Bank Group works in every major area of development. We provide a wide array of financial products and technical assistance, and we help countries share and apply innovative knowledge and solutions to the challenges they face.</p> <p>Three priorities guide our work with countries to <b>end poverty and boost prosperity for the poorest people. Helping create sustainable economic growth, investing in people and building resilience to shocks and threats</b> that can roll back decades of progress.</p> <p><b>Themes</b></p> <ul style="list-style-type: none"> <li>• Economic Policy</li> <li>• Environment and Resource Development</li> <li>• Finance</li> <li>• Human Development and Gender</li> <li>• Private Sector Development</li> <li>• Public Sector Management</li> <li>• Social Development and Protection</li> <li>• Urban and Rural Development” (<a href="#">World Bank Annual Report 2019</a>)</li> </ul>                                                                                                                                                                                                                                                                                                                                             | <p><b>Health Focus Area</b> Focused on ending poverty in the world’s poorest countries, the World Bank’s International Development Association (IDA) disbursed \$1.1 billion of DAH in 2019, down 33.9% from 2018. The International Bank for Reconstruction and Development (IBRD) is a global development cooperative owned by 189 countries. As “the world’s largest development bank,” the IBRD helps countries reduce poverty and extend the benefits of sustainable growth to all people. In 2019, the IBRD disbursed \$11.1 billion of DAH, up 25.4% from 2018. Funds were targeted at <b>reproductive, maternal, newborn, and child health; vaccination programs; infectious diseases; and NCDs.</b></p> <p><b>Region</b> 27.6% of DAH disbursed by development banks</p> | <p><u>Topics from 2016-2020 tweets (no order)</u></p> <p>Africa<br/>Agriculture<br/>Children<br/>Climate change<br/>Food security<br/>Humanitarian aid<br/>Poverty<br/>Sanitation<br/>Water<br/>Women</p> | <p>End poverty and boost prosperity through sustainable economic growth, investing in people, and building resilience to shocks and threats;</p> <p>Maternal and child health, health emergencies, nutrition, infectious diseases, tobacco control, mental health</p> | <p>Child and maternal health and Africa are consistent across DAH data and tweets.</p> <p>Child and maternal health are consistent across stated and revealed priorities.</p> <p>To maximize the benefits of their pre-determined goal of ending poverty and boosting prosperity for the poorest people, the World Bank prioritizes on child and maternal health issues in Africa.</p> | Yes |



|               |                                                                                                                                                                                                                                                                                                                                                                                                                                                                                                                                                                                                                                                                                                                                                                     |                                                                                                                                                                                                                                                                                                                                                                                                                                                                                                                                                                                                                                                                                                            |                                                                                                                                                                                                            |                                                                                                                  |                                                                                                                 |                                                                                                                                                                                                                                                                       |            |
|---------------|---------------------------------------------------------------------------------------------------------------------------------------------------------------------------------------------------------------------------------------------------------------------------------------------------------------------------------------------------------------------------------------------------------------------------------------------------------------------------------------------------------------------------------------------------------------------------------------------------------------------------------------------------------------------------------------------------------------------------------------------------------------------|------------------------------------------------------------------------------------------------------------------------------------------------------------------------------------------------------------------------------------------------------------------------------------------------------------------------------------------------------------------------------------------------------------------------------------------------------------------------------------------------------------------------------------------------------------------------------------------------------------------------------------------------------------------------------------------------------------|------------------------------------------------------------------------------------------------------------------------------------------------------------------------------------------------------------|------------------------------------------------------------------------------------------------------------------|-----------------------------------------------------------------------------------------------------------------|-----------------------------------------------------------------------------------------------------------------------------------------------------------------------------------------------------------------------------------------------------------------------|------------|
|               | <p>"World Bank Health Focus Areas:</p> <ol style="list-style-type: none"> <li>1. <b>Women and children's health</b></li> <li>2. <b>Health emergencies</b></li> <li>3. <b>Nutrition</b></li> <li>4. <b>Infectious diseases</b></li> <li>5. <b>Tobacco control</b></li> <li>6. <b>Mental health"</b></li> </ol> <p><a href="#">(World Bank Health Focus Areas)</a></p>                                                                                                                                                                                                                                                                                                                                                                                                | <p>as group went to <b>sub-Saharan Africa</b> and 20.5% to North Africa and the Middle East.</p>                                                                                                                                                                                                                                                                                                                                                                                                                                                                                                                                                                                                           |                                                                                                                                                                                                            |                                                                                                                  |                                                                                                                 |                                                                                                                                                                                                                                                                       |            |
| <p>UNAIDS</p> | <p><b>"Strategic leadership agenda</b><br/>In the light of the need for change, this Strategy seeks to achieve a set of far-reaching and people-centred goals and targets that must be met by 2020 if we are to reach our 2030 ambition of ending the AIDS epidemic. The goals correspond to each of the three strategic directions, and include achieving by 2020:</p> <ul style="list-style-type: none"> <li>• Fewer than 500 000 people newly infected with HIV</li> <li>• Fewer than 500 000 people dying from AIDS-related causes</li> <li>• Elimination of HIV-related discrimination"</li> </ul> <p><a href="#">(UNAIDS 2016-2021 Strategy)</a></p>                                                                                                          | <p><b>Health Focus Area</b><br/>UNAIDS is leading the global effort to end <b>AIDS</b> as a public health threat by 2030. In addition, the agency is working toward its 2020 90-90-90 targets: for 90% of people living with HIV/AIDS to know their status; for 90% of those diagnosed with infections to receive antiretroviral treatments; and for 90% of patients receiving antiretroviral therapy to have viral suppression. In 2019, the agency disbursed \$207.3 million, up 1.7% from 2018. The top five contributors to UNAIDS in 2019 were the US, Sweden, the Netherlands, the UK, and Norway.</p> <p><b>Region</b><br/>DAH data for UNAIDS in 2019 have unallocated or unspecified regions.</p> | <p><b>Topics from 2016-2020 tweets (no order)</b></p> <p>Access<br/>Africa<br/>Discrimination<br/>HIV/AIDS<br/>Human Rights<br/>Innovation<br/>Prevention<br/>Testing<br/>Treatment<br/>Women</p>          | <p>Ending the AIDS epidemic by 2030.</p>                                                                         | <p>HIV/AIDS prevention, testing, and treatment is consistent across DAH data and tweets.</p>                    | <p>HIV/AIDS prevention, testing, and treatment are consistent across stated and revealed priorities.</p> <p>To maximize benefits of their pre-determined goal of ending the AIDS epidemic by 2030, UNAIDS focuses on HIV/AIDS prevention, testing, and treatment.</p> | <p>Yes</p> |
| <p>UNFPA</p>  | <p>"Our goal is to achieve <b>universal access to sexual and reproductive health, realize reproductive rights, and reduce maternal mortality</b> to accelerate progress on the agenda of the Programme of Action of the International Conference on Population and Development (ICPD), to <b>improve the lives of women, adolescents and youth</b>, enabled by population dynamics, human rights and gender equality.</p> <p><b>Priority Areas</b></p> <ul style="list-style-type: none"> <li>• Sexual and reproductive health services and reproductive rights</li> <li>• Adolescent and youth empowerment</li> <li>• Gender equality and women's empowerment</li> <li>• Population data for development"</li> </ul> <p><a href="#">(UNFPA Strategic Plan)</a></p> | <p><b>Health Focus Area</b><br/>The United Nations Population Fund (UNFPA) is the United Nations' <b>sexual and reproductive health</b> agency. UNFPA's programs include the Maternal and Newborn Health Thematic Fund, focused on preventing maternal deaths through strategic interventions. Training midwives and ending fistula, a childbirth injury caused by prolonged obstructed labor, are also part of the <b>Maternal and Newborn Health Thematic Fund</b>. In 2019, UNFPA disbursed \$1.1 billion in DAH, down 1.7% from 2018. Of this, UNFPA received \$466.8 million, or 43.8% from governments. In</p>                                                                                       | <p><b>Topics from 2016-2020 tweets (no order)</b></p> <p>Africa<br/>Child Marriage<br/>Children<br/>Family planning<br/>FGM<br/>Human Rights<br/>Humanitarian Aid<br/>Nutrition<br/>Violence<br/>Women</p> | <p>Universal access to sexual and reproductive health, reproductive rights, maternal mortality, child health</p> | <p>Sexual and reproductive health, and maternal and child health are consistent across DAH data and tweets.</p> | <p>HIV/AIDS prevention, testing, and treatment are consistent across stated and revealed priorities.</p> <p>To maximize benefits of their pre-determined goal of ending the AIDS epidemic by 2030, UNAIDS focuses on HIV/AIDS prevention, testing, and treatment.</p> | <p>Yes</p> |

|         |                                                                                                                                                                                                                                                                                                                                                                                                                                                                                                                                                                                                                                                                                                                                                                                                                                                                                                                                                                                                                                                         |                                                                                                                                                                                                                                                                                                                                                                                                                                                                                                                                                                                               |                                                                                                                                                                                                  |                                                                                                                                     |                                                                                                                                    |                                                                                                                                                                                                                                                                                                             |     |
|---------|---------------------------------------------------------------------------------------------------------------------------------------------------------------------------------------------------------------------------------------------------------------------------------------------------------------------------------------------------------------------------------------------------------------------------------------------------------------------------------------------------------------------------------------------------------------------------------------------------------------------------------------------------------------------------------------------------------------------------------------------------------------------------------------------------------------------------------------------------------------------------------------------------------------------------------------------------------------------------------------------------------------------------------------------------------|-----------------------------------------------------------------------------------------------------------------------------------------------------------------------------------------------------------------------------------------------------------------------------------------------------------------------------------------------------------------------------------------------------------------------------------------------------------------------------------------------------------------------------------------------------------------------------------------------|--------------------------------------------------------------------------------------------------------------------------------------------------------------------------------------------------|-------------------------------------------------------------------------------------------------------------------------------------|------------------------------------------------------------------------------------------------------------------------------------|-------------------------------------------------------------------------------------------------------------------------------------------------------------------------------------------------------------------------------------------------------------------------------------------------------------|-----|
|         |                                                                                                                                                                                                                                                                                                                                                                                                                                                                                                                                                                                                                                                                                                                                                                                                                                                                                                                                                                                                                                                         | 2018, the US withheld funding from UNFPA for the third year in a row under the Kemp-Kasten amendment.                                                                                                                                                                                                                                                                                                                                                                                                                                                                                         |                                                                                                                                                                                                  |                                                                                                                                     |                                                                                                                                    |                                                                                                                                                                                                                                                                                                             |     |
|         |                                                                                                                                                                                                                                                                                                                                                                                                                                                                                                                                                                                                                                                                                                                                                                                                                                                                                                                                                                                                                                                         | <u>Region</u><br>DAH data for UNFPA in 2019 have unallocated or unspecified regions.                                                                                                                                                                                                                                                                                                                                                                                                                                                                                                          |                                                                                                                                                                                                  |                                                                                                                                     |                                                                                                                                    |                                                                                                                                                                                                                                                                                                             |     |
| UNICEF  | <p><b>“Vision:</b> Realizing the rights of every child, especially the most disadvantaged.</p> <p><b>Goal areas:</b></p> <ul style="list-style-type: none"> <li>• Every child survives and thrives</li> <li>• Every child learns</li> <li>• Every child is protected from violence and exploitation</li> <li>• Every child lives in a safe and clean environment</li> <li>• Every child has an equitable chance in life”</li> </ul> <p><a href="#">(UNICEF Strategic Plan 2018-2021)</a></p>                                                                                                                                                                                                                                                                                                                                                                                                                                                                                                                                                            | <p><u>Health Focus Area</u><br/>UNICEF provides long-term <b>humanitarian and development assistance to children and mothers</b>, with a specific focus on <b>nutrition, immunization, and HIV/AIDS</b>, as well as <b>emergency (i.e., pandemic) assistance</b>.</p> <p>UNICEF disbursed \$2.6 billion in DAH in 2019, up 12.5% from 2018. Private philanthropies provided UNICEF with \$519.3 million, or 19.8% of its funding in 2019, and the US contributed \$316.9 million, or 12.1%.</p> <p><u>Region</u><br/>DAH data for UNICEF in 2019 have unallocated or unspecified regions.</p> | <p><u>Topics from 2016-2020 tweets (no order)</u></p> <p>Africa<br/>Breastfeeding<br/>Children<br/>Climate Change<br/>Ebola<br/>Education<br/>Human Rights<br/>Online<br/>Violence<br/>Water</p> | <p>Realizing the rights of every child, especially the most disadvantaged.</p> <p>Health related: child health, child mortality</p> | <p>Child and maternal health are consistent across DAH data and tweets.</p>                                                        | <p>Child and maternal health are consistent across stated and revealed priorities.</p> <p>To maximize benefits of their pre-determined goal of realizing the rights of every child, UNICEF focuses on child and maternal health.</p>                                                                        | Yes |
| UNITAID | <p>“Unitaid’s Strategy for 2017-2021 is firmly grounded in its Constitution, which states that Unitaid aims to ‘contribute to scale up access to treatment for <b>HIV/AIDS, malaria and tuberculosis</b> for the people in developing countries by <b>leveraging price reductions of quality drugs and diagnostics</b>, which currently are unaffordable for most developing countries, and to accelerate the pace at which they are made available.’ Innovation, access, and scalability. They guide the design of unitaid’s interventions, which</p> <ul style="list-style-type: none"> <li>• Promote innovation. Unitaid connects those who are developing innovations with people who need them the most. Innovation means both using existing commodities in new ways and developing new products and approaches.</li> <li>• Catalyze equitable access to better health products. Unitaid leverages its market expertise and its relationships with partners to design a portfolio of projects that will overcome barriers to access to</li> </ul> | <p><u>Health Focus Area</u><br/>In 2019, Unitaid disbursed \$154.1 million in DAH, up 35.2% from 2018. Projects Unitaid has been working on include a net program to combat malaria and a program to distribute and promote HIV self-testing kits in Africa. US contributed \$316.9 million, or 12.1%.</p> <p><u>Region</u><br/>DAH data for UNITAID in 2019 have unallocated or unspecified regions.</p>                                                                                                                                                                                     | <p><u>Topics from 2016-2020 tweets (no order)</u></p> <p>Access<br/>Cancer<br/>Children<br/>Hepatitis<br/>HIV/AIDS<br/>Malaria<br/>Testing<br/>Treatment<br/>Tuberculosis<br/>Vaccines</p>       | <p>Access to treatment of, affordability of drugs, and innovation in addressing HIV/AIDS, malaria, tuberculosis</p>                 | <p>Increasing access, testing, and treatment of HIV/AIDS, malaria, and tuberculosis are consistent across DAH data and tweets.</p> | <p>HIV/AIDS, malaria, and tuberculosis are consistent across stated and revealed priorities.</p> <p>To maximize benefits of their pre-determined goal of scaling up treatment for HIV/AIDS, malaria, and tuberculosis in developing countries, UNITAID prioritizes HIV/AIDS, malaria, and tuberculosis.</p> | Yes |

|             |                                                                                                                                                                                                                                                                                                                                                                                                                                                                                                                                                                                                                                                                                                                                                                                                                                                                                                                                                                                                                                                                                                                                                                                                                                              |                                                                                                                                                                                                                                                                                                                                                                                                                                                                                                                                              |                                                                                                                                                                                    |                                                                                                  |                                                                                                                                                                                                                                                                                                                                                                                                                                                                               |     |  |
|-------------|----------------------------------------------------------------------------------------------------------------------------------------------------------------------------------------------------------------------------------------------------------------------------------------------------------------------------------------------------------------------------------------------------------------------------------------------------------------------------------------------------------------------------------------------------------------------------------------------------------------------------------------------------------------------------------------------------------------------------------------------------------------------------------------------------------------------------------------------------------------------------------------------------------------------------------------------------------------------------------------------------------------------------------------------------------------------------------------------------------------------------------------------------------------------------------------------------------------------------------------------|----------------------------------------------------------------------------------------------------------------------------------------------------------------------------------------------------------------------------------------------------------------------------------------------------------------------------------------------------------------------------------------------------------------------------------------------------------------------------------------------------------------------------------------------|------------------------------------------------------------------------------------------------------------------------------------------------------------------------------------|--------------------------------------------------------------------------------------------------|-------------------------------------------------------------------------------------------------------------------------------------------------------------------------------------------------------------------------------------------------------------------------------------------------------------------------------------------------------------------------------------------------------------------------------------------------------------------------------|-----|--|
|             | <p>innovative health products</p> <ul style="list-style-type: none"> <li>Create the right conditions for scale up, so better health products reach all people who need them. From conception through implementation, Unitaid works with partners to ensure that projects transition to scale.” (<a href="#">Unitaid Strategy 2017-2021</a>)</li> </ul>                                                                                                                                                                                                                                                                                                                                                                                                                                                                                                                                                                                                                                                                                                                                                                                                                                                                                       |                                                                                                                                                                                                                                                                                                                                                                                                                                                                                                                                              |                                                                                                                                                                                    |                                                                                                  |                                                                                                                                                                                                                                                                                                                                                                                                                                                                               |     |  |
| Gavi        | <p>“Our 2016–2020 mission, to <b>save children’s lives and protect people’s health by increasing equitable use of vaccines in lower-income countries</b>, is guided by four strategic goals</p> <ol style="list-style-type: none"> <li>1. Accelerate equitable uptake and coverage of vaccines.</li> <li>2. Increase effectiveness and efficiency of immunisation delivery as an integrated part of strengthened health systems.</li> <li>3. Improve sustainability of national immunisation programmes.</li> <li>4. Shape markets for vaccines and other immunisation products.</li> </ol> <p>The current five-year strategy was approved by the Board in June 2014 – the full implementation of the strategy will see developing countries immunise 300 million children, saving 5–6 million lives in the long term. <b>Coverage and equity</b> are at the core of our current strategy. While we continue to support countries to introduce new vaccines, our focus is expanding to reach every child with these vaccines. With as many as 20 countries transitioning out of our financial support in this period, ensuring that programmes are sustainable in the long term is essential.” (<a href="#">Gavi Strategy 2016-2020</a>)</p> | <p><u>Health Focus Area</u><br/>In 2019, Gavi channeled \$1.8 billion in development assistance for health to <b>child health</b> (94.4% of Gavi funding) and non-communicable disease-related programs. Top sources of funding for Gavi in 2019 were the Bill &amp; Melinda Gates Foundation, the United States, and the United Kingdom.</p> <p><u>Region</u><br/>In 2017, 52.6% of DAH disbursed by Gavi went to <b>sub-Saharan Africa</b> and 25.5% to South Asia. DAH data for Gavi in 2019 have unallocated or unspecified regions.</p> | <p><u>Topics from 2016-2020 tweets (no order)</u></p> <p>Africa<br/>Cancer<br/>Children<br/>Cholera<br/>Ebola<br/>Measles<br/>Pneumonia<br/>Polio<br/>Poverty<br/>Vaccines</p>     | <p>Increasing overall coverage and equity in vaccinating children in lower-income countries.</p> | <p>Child health, vaccination, infectious diseases, and Africa are consistent across DAH data and tweets.</p> <p>Child health, vaccination, infectious diseases, and Africa are consistent across stated and revealed priorities.</p> <p>To maximize benefits of their pre-determined goal of “saving children’s lives by increasing equitable use of vaccines in lower-income countries”, Gavi prioritizes child health and vaccination of infectious diseases in Africa.</p> | Yes |  |
| Global Fund | <p>“The Global Fund Strategy 2017-2022: Investing to End Epidemics outlines our partnership’s bold agenda for 2017-2022 based on an ambitious vision to <b>end the epidemics</b>. These four strategic objectives are at the core of the strategy:</p> <ul style="list-style-type: none"> <li>• Maximize impact against <b>HIV, TB, and Malaria</b></li> <li>• Promote and protect <b>human rights and gender equality</b></li> <li>• Mobilize increased resources</li> <li>• Build <b>resilient and sustainable systems for health</b>” (<a href="#">Global</a>)</li> </ul>                                                                                                                                                                                                                                                                                                                                                                                                                                                                                                                                                                                                                                                                 | <p><u>Health Focus Area</u><br/>In 2019, the Global Fund channeled a total of \$3.5 billion to programs worldwide. Leading sources of Global Fund contributions were the United States, the United Kingdom, and Japan. The UK provided \$817.1 million or 23.3% to the Global Fund in 2019, more than any other contributor. The US contributed \$636.5 million or 18.1%, Japan contributed \$442.4 million or 12.6%, and Germany</p>                                                                                                        | <p><u>Topics from 2016-2020 tweets (no order)</u></p> <p>Africa<br/>Children<br/>Cholera<br/>Ebola<br/>HIV/AIDS<br/>Malaria<br/>Pneumonia<br/>Polio<br/>Tuberculosis<br/>Women</p> | <p>To end HIV/AIDS, malaria, and tuberculosis epidemics</p>                                      | <p>HIV/AIDS, malaria, tuberculosis, and Africa are consistent across DAH data and tweets.</p> <p>To maximize benefits of their pre-determined goal of “ending the epidemics”, the Global Fund prioritizes child health and vaccination of</p>                                                                                                                                                                                                                                 | Yes |  |

|            |                                                                                                                                                                                                                                                                                                                                                                                                                                                                                                                                                                                                                                                                                                                                                                                                                                                                                                                                                                                                                                                                                                                                                                                                                                                                                                                                              |                                                                                                                                                                                                                                                                                                                                                                                                                                                                                                                                                                       |                                                                                                                                                                                   |                                                                                                           |                                                                                              |                                                                                                                                                                                                                                                                                                     |            |
|------------|----------------------------------------------------------------------------------------------------------------------------------------------------------------------------------------------------------------------------------------------------------------------------------------------------------------------------------------------------------------------------------------------------------------------------------------------------------------------------------------------------------------------------------------------------------------------------------------------------------------------------------------------------------------------------------------------------------------------------------------------------------------------------------------------------------------------------------------------------------------------------------------------------------------------------------------------------------------------------------------------------------------------------------------------------------------------------------------------------------------------------------------------------------------------------------------------------------------------------------------------------------------------------------------------------------------------------------------------|-----------------------------------------------------------------------------------------------------------------------------------------------------------------------------------------------------------------------------------------------------------------------------------------------------------------------------------------------------------------------------------------------------------------------------------------------------------------------------------------------------------------------------------------------------------------------|-----------------------------------------------------------------------------------------------------------------------------------------------------------------------------------|-----------------------------------------------------------------------------------------------------------|----------------------------------------------------------------------------------------------|-----------------------------------------------------------------------------------------------------------------------------------------------------------------------------------------------------------------------------------------------------------------------------------------------------|------------|
|            | <p><a href="#">Fund Strategy 2017-2022</a></p>                                                                                                                                                                                                                                                                                                                                                                                                                                                                                                                                                                                                                                                                                                                                                                                                                                                                                                                                                                                                                                                                                                                                                                                                                                                                                               | <p>contributed \$396.7 million or 11.3%.</p> <p>50.4% of funding were allocated to address <b>HIV/AIDS</b>, 31.7% to <b>Malaria</b>, and 17.8% to <b>Tuberculosis</b>.</p> <p><u>Region</u><br/>In 2019, 72.7% of DAH disbursed by the Global Fund went to <b>sub-Saharan Africa</b> and 10.5% to Southeast Asia, East Asia, and Oceania. DAH data for the Global Fund in 2019 have unallocated or unspecified regions.</p>                                                                                                                                           |                                                                                                                                                                                   |                                                                                                           |                                                                                              | <p>infectious diseases in Africa.</p>                                                                                                                                                                                                                                                               |            |
| <p>CDC</p> | <p>“CDC’s Strategic Framework consists of five core capabilities that enable the agency’s three strategic priorities, all united behind one mission: <b>protect America’s safety, health, and security</b>. Our work is underscored by the agency’s Pledge to the American People.</p> <p><b>Strategic Priorities</b></p> <ul style="list-style-type: none"> <li>• Securing global health and America’s preparedness             <ul style="list-style-type: none"> <li>• By stopping the spread of pandemic contagions, addressing public health terror threats, and protecting people from vector-borne diseases.</li> </ul> </li> <li>• Eliminating disease             <ul style="list-style-type: none"> <li>• By controlling vaccine-preventable disease, targeting Hepatitis C, and reducing the maternal mortality rate.</li> </ul> </li> <li>• Ending epidemics             <ul style="list-style-type: none"> <li>• Such as HIV, decreasing opioid overdoses, improving strategies and interventions to stem seasonal influenza, developing and deploying new answers for antibiotic resistance, and reducing new incidents of diabetes.</li> </ul> </li> </ul> <p><b>Core Capabilities</b></p> <ul style="list-style-type: none"> <li>• World-class data and analytics</li> <li>• State-of-the-art laboratory capacity</li> </ul> | <p><u>Health Focus Area</u><br/>Protecting Americans from Infectious Diseases at Home and Abroad (\$3.0 billion)<br/>Preventing the Leading Causes of Disease, Disability, &amp; Death (\$2.0 billion)<br/>Protecting Americans from Natural Disasters, Terrorist Threats, Environmental &amp; Occupational Hazards (\$1.5 billion)<br/>Monitoring Health &amp; Ensuring Laboratory Excellence (\$496 million)<br/>Cross-cutting Support &amp; PHS Block Grant &amp; Buildings &amp; Facilities (\$357 million)</p> <p><u>Region</u><br/>United States and global</p> | <p><u>Topics from 2016-2020 tweets (no order)</u></p> <p>Children<br/>Diarrhea<br/>E. Coli<br/>influenza<br/>Measles<br/>Prevention<br/>Vaccines<br/>Water<br/>Women<br/>Zika</p> | <p>National security from infectious diseases</p> <p>Securing global health and national preparedness</p> | <p>Protecting the USA from infectious diseases is consistent across DAH data and tweets.</p> | <p>HIV/AIDS, malaria, tuberculosis, and Africa are consistent across stated and revealed priorities.</p> <p>To maximize benefits of their pre-determined goal of “protecting America’s safety, health, and security”, the CDC prioritizes infectious disease protection in the US and globally.</p> | <p>Yes</p> |

|        |                                                                                                                                                                                                                                                                                                                                                                                                                                                                                                                                                                                                                                                                                                                                                                                                                                                                                                                                                                                                                   |                                                                                                                                                                                                                                                                                                                                                                                                                               |                                                                                                                                                                                                  |                                                                                              |                                                                                                           |                                                                                                                      |     |
|--------|-------------------------------------------------------------------------------------------------------------------------------------------------------------------------------------------------------------------------------------------------------------------------------------------------------------------------------------------------------------------------------------------------------------------------------------------------------------------------------------------------------------------------------------------------------------------------------------------------------------------------------------------------------------------------------------------------------------------------------------------------------------------------------------------------------------------------------------------------------------------------------------------------------------------------------------------------------------------------------------------------------------------|-------------------------------------------------------------------------------------------------------------------------------------------------------------------------------------------------------------------------------------------------------------------------------------------------------------------------------------------------------------------------------------------------------------------------------|--------------------------------------------------------------------------------------------------------------------------------------------------------------------------------------------------|----------------------------------------------------------------------------------------------|-----------------------------------------------------------------------------------------------------------|----------------------------------------------------------------------------------------------------------------------|-----|
|        | <ul style="list-style-type: none"> <li>Elite public health expertise</li> <li>Responding to outbreaks at their source</li> <li>Global capacity and domestic preparedness” (<a href="#">CDC Strategic Framework</a>)</li> </ul>                                                                                                                                                                                                                                                                                                                                                                                                                                                                                                                                                                                                                                                                                                                                                                                    |                                                                                                                                                                                                                                                                                                                                                                                                                               |                                                                                                                                                                                                  |                                                                                              |                                                                                                           |                                                                                                                      |     |
| EU CDC | <p>““ECDC is an EU agency aimed at <b>strengthening Europe's defences against infectious diseases</b>. The core functions cover a wide spectrum of activities: surveillance, epidemic intelligence, response, scientific advice, microbiology, preparedness, public health training, international relations, health communication, and the scientific journal Eurosurveillance.</p> <p><b>Strategic Work Areas</b></p> <ul style="list-style-type: none"> <li>Providing evidence for effective and efficient decision-making: We support efficient public health decisionmaking by providing <b>timely, accurate and relevant information</b>.</li> <li>Support the <b>strengthening of public health systems</b>: We strengthen European capacities and capabilities effectively prevent and control communicable diseases.</li> <li>Supporting <b>response to threats</b>: We support effective health threats detection, assessment and control.”</li> </ul> <p>(<a href="#">ECDC Annual Report 2019</a>)</p> | <p><b>Health Focus Area</b><br/>All funding is spent on expenses for staff, buildings and equipment, and operations for surveillance, research, and response to infectious disease epidemics.</p> <p><u>Region</u><br/>European Union and global</p>                                                                                                                                                                          | <p><u>Topics from 2016-2020 tweets (no order)</u></p> <p>Ebola<br/>Hepatitis<br/>HIV/AIDS<br/>Influenza<br/>Measles<br/>Outbreaks<br/>Report<br/>Surveillance<br/>Tuberculosis<br/>West Nile</p> | European security from infectious disease                                                    | Infectious disease surveillance, reporting, and research are consistent across DAH data and tweets.       | Infectious disease surveillance, reporting, and research are consistent across stated and revealed priorities.       | Yes |
| NIH    | <p>“NIH’s mission is to seek fundamental knowledge about the nature and behavior of living systems and the application of that knowledge to enhance health, lengthen life, and reduce illness and disability.</p> <p>The goals of the agency are:</p> <ul style="list-style-type: none"> <li>to foster <b>fundamental creative discoveries, innovative research strategies</b>, and their applications as a basis for ultimately <b>protecting and improving health</b>;</li> <li>to develop, maintain, and renew scientific human and physical resources that will <b>ensure the Nation’s capability to prevent disease</b>;</li> <li>to expand the knowledge base in medical and associated sciences in order to enhance the Nation’s economic well-being and ensure a continued high return on the public</li> </ul>                                                                                                                                                                                           | <p><b>Health Focus Area</b><br/>In 2019, NIH had a \$39.2B discretionary budget.</p> <ol style="list-style-type: none"> <li>NCI (14.7%) – cancer</li> <li>NIAID (14.1%) – allergy and infectious disease</li> <li>NHLBI (8.9%) – heart, lung, and blood</li> <li>NIA (7.9%) – instate on aging</li> <li>NIGMS (7.3%) – general medical sciences</li> </ol> <p><u>Region</u><br/>United States (with some global research)</p> | <p><u>Topics from 2016-2020 tweets (no order)</u></p> <p>Africa<br/>Cancer<br/>Funding<br/>Heart Disease<br/>HIV/AIDS<br/>News<br/>Rare Disease<br/>Research<br/>Stress<br/>Veterans</p>         | National security through developing new knowledge in enhancing health and lengthening life. | Research on cancer, HIV/AIDS, heart disease, and rare diseases are consistent across DAH data and tweets. | Research on cancer, HIV/AIDS, heart disease, and rare diseases are consistent across stated and revealed priorities. | Yes |

|      |                                                                                                                                                                                                                                                                                                                                                                                                                                                                                                                                                                                                                                                                                                                                                                                                                                                                                                                                                                                                                                                            |                                                                                                                                                                                                                                                                                                  |                                                                                                                                                                                                        |                                                                                                       |                                                                                            |                                                                                                                                                                                                                                                                                        |     |
|------|------------------------------------------------------------------------------------------------------------------------------------------------------------------------------------------------------------------------------------------------------------------------------------------------------------------------------------------------------------------------------------------------------------------------------------------------------------------------------------------------------------------------------------------------------------------------------------------------------------------------------------------------------------------------------------------------------------------------------------------------------------------------------------------------------------------------------------------------------------------------------------------------------------------------------------------------------------------------------------------------------------------------------------------------------------|--------------------------------------------------------------------------------------------------------------------------------------------------------------------------------------------------------------------------------------------------------------------------------------------------|--------------------------------------------------------------------------------------------------------------------------------------------------------------------------------------------------------|-------------------------------------------------------------------------------------------------------|--------------------------------------------------------------------------------------------|----------------------------------------------------------------------------------------------------------------------------------------------------------------------------------------------------------------------------------------------------------------------------------------|-----|
|      | <p>investment in research; and</p> <ul style="list-style-type: none"> <li>to exemplify and promote the highest level of scientific integrity, public accountability, and social responsibility in the conduct of science.</li> </ul> <p>In realizing these goals, the NIH provides leadership and direction to programs designed to improve the health of the Nation by conducting and supporting research:</p> <ul style="list-style-type: none"> <li>in the <b>causes, diagnosis, prevention, and cure of human diseases;</b></li> <li>in the processes of human growth and development;</li> <li>in the biological effects of environmental contaminants;</li> <li>in the <b>understanding of mental, addictive and physical disorders;</b> and</li> <li>in directing programs for the collection, dissemination, and exchange of information in medicine and health, including the development and support of medical libraries and the training of medical librarians and other health information specialists.</li> </ul>                            |                                                                                                                                                                                                                                                                                                  |                                                                                                                                                                                                        |                                                                                                       |                                                                                            |                                                                                                                                                                                                                                                                                        |     |
| FAO  | <p>"Today, member states face an increasing number of demands and challenges in agricultural development. To support them, FAO has identified five key priorities on which it is best placed to intervene. These priorities, or Strategic Objectives, represent our main areas of work to achieve our <b>vision of a world free from hunger and malnutrition, where food and agriculture help to improve the living standards of all</b>, especially the poorest, in an economically, socially and environmentally sustainable manner – contributing to the implementation of the 2030 Agenda for Sustainable Development.</p> <ol style="list-style-type: none"> <li><b>Help eliminate hunger, food insecurity, and malnutrition</b></li> <li>Make agriculture, forestry, and fisheries more productive and sustainable</li> <li>Reduce rural poverty</li> <li>Enable inclusive and efficient agricultural food systems</li> <li>Increase the resilience of livelihoods to threats and crises" (<a href="#">FAO Strategic Objectives 2019</a>)</li> </ol> | <p><u>Health Focus Area</u><br/>All received funding is spent on staffing and program expenses in addressing hunger, food insecurity, malnutrition, and improving resiliency of food systems.</p> <p><u>Region</u><br/>Funding data for FAO in 2019 have unallocated or unspecified regions.</p> | <p><u>Topics from 2016-2020 tweets (no order)</u></p> <p>Africa<br/>Agriculture<br/>Biodiversity<br/>Climate Change<br/>Families<br/>Farmers<br/>Fisheries<br/>Food Security<br/>Forests<br/>Water</p> | Addressing hunger, food insecurity, and malnutrition through improving food and agricultural systems. | Food insecurity, malnutrition, and food systems are consistent across DAH data and tweets. | Food insecurity, malnutrition, and food systems are consistent across stated and revealed priorities.<br><br>To maximize benefits of their pre-determined goal of a world free from hunger and malnutrition, the FAO prioritizes eliminating hunger, food insecurity, and malnutrition | Yes |
| UNDP | "UNDP's Strategic Plan (2018-2021) has been designed to be                                                                                                                                                                                                                                                                                                                                                                                                                                                                                                                                                                                                                                                                                                                                                                                                                                                                                                                                                                                                 | <u>Total budget allocation</u>                                                                                                                                                                                                                                                                   | <u>Topics from 2016-2020 tweets</u>                                                                                                                                                                    | Poverty eradication,                                                                                  | HIV/AIDS, malaria, and                                                                     | HIV/AIDS, malaria, and                                                                                                                                                                                                                                                                 | Yes |

|     |                                                                                                                                                                                                                                                                                                                                                                                                                                                                                                                                                                                                                                                                                                                                                                                                                                                                                                                                                                                                                                                                                                                                                                                                                                                                                                                       |                                                                                                                                                                                                                                                                                                                                                                                                                                                                                                                                                                                                                             |                                                                                                                                                                                                       |                                                                                                                                                                                                                                                                                                                                                                                                                                 |                                                                                                                     |                                                                                                                                                                                                                                                                                                                                               |     |
|-----|-----------------------------------------------------------------------------------------------------------------------------------------------------------------------------------------------------------------------------------------------------------------------------------------------------------------------------------------------------------------------------------------------------------------------------------------------------------------------------------------------------------------------------------------------------------------------------------------------------------------------------------------------------------------------------------------------------------------------------------------------------------------------------------------------------------------------------------------------------------------------------------------------------------------------------------------------------------------------------------------------------------------------------------------------------------------------------------------------------------------------------------------------------------------------------------------------------------------------------------------------------------------------------------------------------------------------|-----------------------------------------------------------------------------------------------------------------------------------------------------------------------------------------------------------------------------------------------------------------------------------------------------------------------------------------------------------------------------------------------------------------------------------------------------------------------------------------------------------------------------------------------------------------------------------------------------------------------------|-------------------------------------------------------------------------------------------------------------------------------------------------------------------------------------------------------|---------------------------------------------------------------------------------------------------------------------------------------------------------------------------------------------------------------------------------------------------------------------------------------------------------------------------------------------------------------------------------------------------------------------------------|---------------------------------------------------------------------------------------------------------------------|-----------------------------------------------------------------------------------------------------------------------------------------------------------------------------------------------------------------------------------------------------------------------------------------------------------------------------------------------|-----|
|     | <p>responsive to the wide diversity of the countries we serve. The diversity is reflected in three broad development contexts:</p> <ul style="list-style-type: none"> <li>• Eradicate poverty in all its forms and dimensions</li> <li>• Accelerate structural transformations</li> <li>• Build resilience to shocks and crises</li> </ul> <p>To respond to these issues, and better focus its resources and expertise to deliver on the 2030 Agenda, UNDP has identified a set of approaches that we call our Signature Solutions:</p> <ul style="list-style-type: none"> <li>• Keeping people out of POVERTY</li> <li>• GOVERNANCE for peaceful, just, and inclusive societies</li> <li>• Crisis prevention and increased RESILIENCE</li> <li>• ENVIRONMENT: nature-based solutions for development</li> <li>• Clean, affordable ENERGY</li> <li>• Women's empowerment and GENDER equality</li> </ul> <p>In all our activities, we encourage the <b>protection of human rights and the empowerment of women, minorities and the poorest and most vulnerable.</b> (<a href="#">UNDP About us</a>)</p> <p>UNDP is the lead development agency in helping the achievement of the Sustainable Development Goals.</p> <p><b>SDG 3: Ensure healthy lives and promote well-being for all at all ages. (UNDP: SDGs)</b></p> | <p>\$5.7 billion budget in 2019</p> <p><u>By UNDP focus</u><br/>Eradicating poverty (43%), accelerate structural transformations (32%), build resilience to shocks and crises (11.5%), others (13.2%)</p> <p><u>By health focus area</u><br/>SDG3 was allotted \$504M (9% of total budget in 2019 –55% to HIV/AIDS, tuberculosis, and malaria (target 3.3), 26% to universal health coverage (target 3.8), 9% to child mortality (target 3.2)</p> <p><u>Region</u><br/>23% of 2019 budget was allocated to Africa, 19% to Asia and the Pacific, 18% to Latin America and the Caribbean.</p>                                 | <p>(no order)</p> <p>Africa<br/>Children<br/>Climate Change<br/>Education<br/>FGM<br/>Food Security<br/>HIV/AIDS<br/>Malaria<br/>Water<br/>Women</p>                                                  | <p>accelerate structural transformations, build resilience to shocks and crises</p> <p>SDG 3: Ensure healthy lives and promote well-being for all at all ages (includes: maternal mortality, child mortality, HIV/AIDS, tuberculosis, malaria, infectious diseases, mental health, substance abuse, road traffic accidents, sexual and reproductive health, universal health coverage, deaths from environmental pollution)</p> | <p>child and maternal health are consistent across DAH data and tweets.</p>                                         | <p>child and maternal health are consistent across stated and revealed preferences.</p> <p>To maximize benefits of their pre-determined global health goal of ensuring healthy lives and promoting well-being for all, the UNDP prioritizes HIV/AIDS, malaria, and child and maternal health.</p>                                             |     |
| MSF | <p>“Médecins Sans Frontières brings <b>medical humanitarian assistance</b> to victims of <b>conflict, natural disasters, epidemics or healthcare exclusion</b>” (<a href="#">MSF About Us</a>)</p> <p>“Program Priorities</p> <ul style="list-style-type: none"> <li>• Outpatient consultations</li> <li>• Birth assistance (including C-section)</li> <li>• Cholera treatment</li> <li>• Inpatient care</li> <li>• Vaccinations against measles</li> <li>• Malaria treatment</li> <li>• Sexual violence</li> <li>• Meningitis treatment</li> <li>• Inpatient feeding programs for malnourished children</li> <li>• TB treatment</li> <li>• HIV ART treatment</li> <li>• Mental health services</li> <li>• Distribution of relief goods”</li> </ul> <p>(<a href="#">International Activity Report 2019</a>)</p>                                                                                                                                                                                                                                                                                                                                                                                                                                                                                                       | <p><u>Health Focus Area</u><br/>“81% of our financial resources are allocated to fulfilling our social mission: 65% to our humanitarian programmes, 12% to support our projects and programmes, and 4% to awareness-raising, the Access Campaign, and the Drugs for Neglected Diseases initiative (DNDi). The rest is spent on general management and fundraising costs. We also maintain reserves that allow us to respond immediately to a crisis without having to wait for an appeal.”</p> <p>Funding is allocated mostly to outpatient consultations, malaria treatment, and birth assistance</p> <p><u>Region</u></p> | <p><u>Topics from 2016-2020 tweets</u><br/>(no order)</p> <p>Africa<br/>Children<br/>Cholera<br/>Ebola<br/>HIV/AIDS<br/>Humanitarian Aid<br/>Refugees<br/>Treatment<br/>Tuberculosis<br/>Violence</p> | <p>Medical humanitarian assistance to victims of conflict, natural disasters, epidemics, or healthcare exclusion.</p>                                                                                                                                                                                                                                                                                                           | <p>Humanitarian aid, HIV/AIDS, infectious diseases, and child health are consistent across DAH data and tweets.</p> | <p>Humanitarian aid, HIV/AIDS, infectious diseases, and child health are consistent across stated and revealed preferences.</p> <p>To maximize benefits of their pre-determined goal of bringing medical humanitarian assistance to victims of crises, MSF prioritizes humanitarian aid, HIV/AIDS, infectious diseases, and child health.</p> | Yes |



|                   |                                                                                                                                                                                                                                                                                                                                                                                                                                                                                                                                                                                                                                                                                                                                                                                                                                                                                           |                                                                                                                                                                                                                                                                                                                                                                                                                                                                                                          |                                                                                                                                                                                                      |                                                                                                                                                                                |                                                                                                                                      |                                                                                                                                                                                                                                                                                                                          |     |
|-------------------|-------------------------------------------------------------------------------------------------------------------------------------------------------------------------------------------------------------------------------------------------------------------------------------------------------------------------------------------------------------------------------------------------------------------------------------------------------------------------------------------------------------------------------------------------------------------------------------------------------------------------------------------------------------------------------------------------------------------------------------------------------------------------------------------------------------------------------------------------------------------------------------------|----------------------------------------------------------------------------------------------------------------------------------------------------------------------------------------------------------------------------------------------------------------------------------------------------------------------------------------------------------------------------------------------------------------------------------------------------------------------------------------------------------|------------------------------------------------------------------------------------------------------------------------------------------------------------------------------------------------------|--------------------------------------------------------------------------------------------------------------------------------------------------------------------------------|--------------------------------------------------------------------------------------------------------------------------------------|--------------------------------------------------------------------------------------------------------------------------------------------------------------------------------------------------------------------------------------------------------------------------------------------------------------------------|-----|
|                   |                                                                                                                                                                                                                                                                                                                                                                                                                                                                                                                                                                                                                                                                                                                                                                                                                                                                                           | Funding data for MSF in 2019 have unallocated or unspecified regions.                                                                                                                                                                                                                                                                                                                                                                                                                                    |                                                                                                                                                                                                      |                                                                                                                                                                                |                                                                                                                                      |                                                                                                                                                                                                                                                                                                                          |     |
| PATH              | <p>"At PATH, we are a global team of innovators working to <b>accelerate health equity</b> so all people and communities can thrive. We advise and partner with public institutions, businesses, grassroots groups, and investors to solve the world's most pressing health challenges." (<a href="#">PATH About Us</a>)</p> <p>"2019 Achievements</p> <ul style="list-style-type: none"> <li>Controlling and eliminating <b>malaria</b></li> <li>Differentiating services for <b>HIV</b> patients</li> <li>Reimagining <b>primary health care</b></li> <li>Creating <b>innovative devices</b> and diagnostics</li> <li>Maximizing impact through <b>policy</b></li> <li>Advancing <b>essential medicines</b></li> <li>Reducing the cost of <b>sanitation</b> and cleaning</li> <li>Expanding access to <b>contraception</b>"</li> </ul> <p>(<a href="#">PATH Annual Report 2019</a>)</p> | <p><b>Health Focus Area</b><br/>Of the \$303 million 2019 budget, 48% was allocated to global health programs, 37% to essential medicines, 11% to technology and innovation, 3.5% to other.</p> <p><b>Region</b><br/>Funding data for PATH in 2019 have unallocated or unspecified regions.</p>                                                                                                                                                                                                          | <p><b>Topics from 2016-2020 tweets (no order)</b></p> <p>Access<br/>Africa<br/>Breastfeeding<br/>Cancer<br/>Children<br/>Ebola<br/>Innovation<br/>Malaria<br/>Pneumonia<br/>Vaccines</p>             | <p>Accelerating health equity</p> <p>Areas:<br/>Malaria, HIV/AIDS, primary health care, health innovations, health policy, essential medicines, sanitation, contraceptives</p> | <p>Malaria, vaccines, and innovations are consistent across DAH data and tweets.</p>                                                 | <p>Malaria, vaccines, and innovations are consistent across stated and revealed preferences.</p> <p>To maximize benefits of their pre-determined goal of "accelerating health equity", PATH prioritizes malaria, vaccines, and health innovations.</p>                                                                   | Yes |
| Save the Children | <p>"For 100 years, we've been giving <b>children</b> in the U.S. and around the world a <b>healthy start in life, the opportunity to learn and protection from harm</b>. When crisis strikes, we are always among the first to respond and the last to leave. We do whatever it takes to save children, transforming their lives and the future we share." (<a href="#">Save the Children About Us</a>)</p> <p><b>Focus Areas</b></p> <ul style="list-style-type: none"> <li>Health and Nutrition</li> <li>Education</li> <li>Hunger and Livelihoods</li> <li>Public Policy and Advocacy</li> <li>HIV/AIDS</li> <li>Child Protection and Rights Governance</li> </ul> <p>(<a href="#">Save the Children Annual Report 2019</a>)</p>                                                                                                                                                       | <p><b>Health Focus Area</b><br/>In 2019, Save the Children had a budget of \$836 million.</p> <ul style="list-style-type: none"> <li>Health &amp; Nutrition (38%)</li> <li>Education (19%)</li> <li>Hunger &amp; Livelihoods (13%)</li> <li>Public Policy &amp; Advocacy (11%)</li> <li>HIV/AIDS (7%)</li> <li>Child Protection &amp; Rights Governance (4%)</li> <li>Other (8%)</li> </ul> <p><b>Region</b><br/>Funding data for Save the Children in 2019 have unallocated or unspecified regions.</p> | <p><b>Topics from 2016-2020 tweets (no order)</b></p> <p>Africa<br/>Children<br/>Donations<br/>Education<br/>Food Security<br/>Humanitarian Aid<br/>Pneumonia<br/>Refugees<br/>Schools<br/>Water</p> | <p>Health related: "giving children a healthy start", "protection from harm"</p>                                                                                               | <p>Child health, nutrition, and food security are consistent across DAH data and tweets.</p>                                         | <p>Child health, nutrition, and food security are consistent across stated and revealed priorities.</p> <p>To maximize benefits of their pre-determined global health goals of "giving children a healthy start and protection from harm", Save the Children prioritizes child health, nutrition, and food security.</p> | Yes |
| Oxfam             | <p>"Oxfam is a global organization working to <b>end the injustice of poverty</b>. We help people <b>build better futures for themselves, hold the powerful accountable, and save lives in disasters</b>." (<a href="#">About Oxfam</a>)</p> <p>"Across Yemen, Puerto Rico, Bangladesh, Syria, Central America, and Mozambique, among many other places, our work is delivering tangible, measurable impact: providing lifesaving aid, partnering with local organizations to achieve long-term solutions, and using</p>                                                                                                                                                                                                                                                                                                                                                                  | <p><b>Health Focus Area</b><br/>Of the \$88 million 2019 budget, 36% was allocated to emergency response and preparedness, 28% to overcoming poverty, 28% to social justice campaigns, 8% to public education.</p> <p><b>Region</b><br/>Of the budget spent on emergency response and preparedness, 40% was allocated to Africa, 24% to Latin</p>                                                                                                                                                        | <p><b>Topics from 2016-2020 tweets (no order)</b></p> <p>Africa<br/>Climate Change<br/>Ebola<br/>Food Security<br/>Humanitarian Aid<br/>Malaria<br/>Pneumonia<br/>Refugees<br/>Water<br/>Women</p>   | <p>Health related: "help people build better futures for themselves," "save lives in disasters"</p>                                                                            | <p>Emergency response (humanitarian aid, Ebola, food security, and infectious disease) is consistent across DAH data and tweets.</p> | <p>Emergency response (humanitarian aid, Ebola, food security, and infectious disease) is consistent across stated and revealed preferences.</p> <p>To maximize benefits of their pre-determined global health goals of "helping</p>                                                                                     | Yes |

|                                    |                                                                                                                                                                                                                                                                                                                                                                                                                                                                                                                                                                                                                                                                                                                                                                                                                                                                                                                                                                                                                                                                                                                                                                                                                                                                                                                                                                                                                                                                                                                                                                                                     |                                                                                                                                                                                                                                                                                                                                                                                                                                                                                                                                                                                                                                                                                                                                                                              |                                                                                                                                                                                                                                                                                                                                                                                                                                                                                                                                                                                                                                                                                                                                                                                                                                                                                                                                                                                                                                                                                                                                                                                         |                                                                                                                            |                                                                                                                                                                                                                                                                                                                                                                                                                                                                                                |                                                                                                                                                                                            |
|------------------------------------|-----------------------------------------------------------------------------------------------------------------------------------------------------------------------------------------------------------------------------------------------------------------------------------------------------------------------------------------------------------------------------------------------------------------------------------------------------------------------------------------------------------------------------------------------------------------------------------------------------------------------------------------------------------------------------------------------------------------------------------------------------------------------------------------------------------------------------------------------------------------------------------------------------------------------------------------------------------------------------------------------------------------------------------------------------------------------------------------------------------------------------------------------------------------------------------------------------------------------------------------------------------------------------------------------------------------------------------------------------------------------------------------------------------------------------------------------------------------------------------------------------------------------------------------------------------------------------------------------------|------------------------------------------------------------------------------------------------------------------------------------------------------------------------------------------------------------------------------------------------------------------------------------------------------------------------------------------------------------------------------------------------------------------------------------------------------------------------------------------------------------------------------------------------------------------------------------------------------------------------------------------------------------------------------------------------------------------------------------------------------------------------------|-----------------------------------------------------------------------------------------------------------------------------------------------------------------------------------------------------------------------------------------------------------------------------------------------------------------------------------------------------------------------------------------------------------------------------------------------------------------------------------------------------------------------------------------------------------------------------------------------------------------------------------------------------------------------------------------------------------------------------------------------------------------------------------------------------------------------------------------------------------------------------------------------------------------------------------------------------------------------------------------------------------------------------------------------------------------------------------------------------------------------------------------------------------------------------------------|----------------------------------------------------------------------------------------------------------------------------|------------------------------------------------------------------------------------------------------------------------------------------------------------------------------------------------------------------------------------------------------------------------------------------------------------------------------------------------------------------------------------------------------------------------------------------------------------------------------------------------|--------------------------------------------------------------------------------------------------------------------------------------------------------------------------------------------|
|                                    | <p>our strong policy voice to advocate for change.</p> <p><b>Program Services</b></p> <ul style="list-style-type: none"> <li>• Saving Lives: Emergency Response and Preparedness</li> <li>• Programs to overcome poverty</li> <li>• Campaigning for social justice</li> <li>• Public education”</li> </ul> <p><a href="#">(Oxfam Annual Report 2019)</a></p>                                                                                                                                                                                                                                                                                                                                                                                                                                                                                                                                                                                                                                                                                                                                                                                                                                                                                                                                                                                                                                                                                                                                                                                                                                        | <p>America and the Caribbean, and 13% to Asia and the Pacific</p>                                                                                                                                                                                                                                                                                                                                                                                                                                                                                                                                                                                                                                                                                                            |                                                                                                                                                                                                                                                                                                                                                                                                                                                                                                                                                                                                                                                                                                                                                                                                                                                                                                                                                                                                                                                                                                                                                                                         |                                                                                                                            |                                                                                                                                                                                                                                                                                                                                                                                                                                                                                                | <p>people build better futures for themselves” and “saving lives in disasters”, Oxfam prioritizes emergency response, humanitarian aid, Ebola, food security, and infectious diseases.</p> |
| <p><b>Global health system</b></p> | <p><b>WHO constitution (1948):</b> “Health for All” and the right to the highest attainable standard of health.</p> <p><b>Declaration of Alma-Ata (1978):</b> universal access to primary health care.</p> <p><b>MDGs (2000):</b> reduce child mortality (4), improve maternal health (5), combat HIV/AIDS and other diseases (6)</p> <p><b>SDGs (2015) [Relevant to study’s time period]:</b> good health and well-being (3)</p> <ul style="list-style-type: none"> <li>• By 2030, reduce the global <b>maternal mortality</b> ratio to less than 70 per 100,000 live births (3.1)</li> <li>• By 2030, end <b>preventable deaths of newborns and children</b> under 5 years of age, with all countries aiming to reduce neonatal mortality to at least as low as 12 per 1,000 live births and under-5 mortality to at least as low as 25 per 1,000 live births (3.2)</li> <li>• By 2030, end the epidemics of <b>AIDS, tuberculosis, malaria</b> and <b>neglected tropical diseases</b> and combat <b>hepatitis</b>, water-borne diseases and other <b>communicable diseases</b> (3.3)</li> <li>• By 2030, reduce by one third premature mortality from <b>non-communicable diseases</b> through prevention and treatment and promote <b>mental health and well-being</b> (3.4)</li> <li>• Strengthen the prevention and treatment of <b>substance abuse</b>, including narcotic drug abuse and harmful use of alcohol (3.5)</li> <li>• By 2020, halve the number of global deaths and injuries from <b>road traffic accidents</b> (3.6)</li> <li>• By 2030, ensure universal access to</li> </ul> | <p><u>Health Focus Areas</u></p> <p>Of the \$41 billion DAH transferred across all global health actors in 2019, 24% was allocated to <b>HIV/AIDS</b>, 21% to <b>newborn and child health</b>, 14% to <b>health system strengthening</b>, 12% to <b>reproductive and maternal health</b>, 6% to other infectious diseases, 6% to malaria, 4% to tuberculosis, and 2% to non-communicable diseases.</p> <p><u>Region</u></p> <p>Funding data in 2019 have unallocated or unspecified regions.</p> <p>In 2017, 33% of all DAH funding was allocated to <b>sub-Saharan Africa</b>, 5% to Southeast Asia, 5% to South Asia, 4% to North Africa and the Middle East, 3% to Latin America and the Caribbean, 2% to Europe and Central Asia, 15% globally, and 32% unallocated.</p> | <p><u>Most common topics from 2016-2020 across 20 key actors</u> (number in parenthesis indicates count of actors that had the topic as a priority from 2016-2020 tweets)</p> <ol style="list-style-type: none"> <li>1. Africa (17),</li> <li>2. Children (15),</li> <li>3. HIV/AIDS (11),</li> <li>4. Women (10),</li> <li>5. Ebola (9),</li> <li>6. Water (9),</li> <li>7. Food security (7),</li> <li>8. Humanitarian aid (7),</li> <li>9. Malaria (7),</li> <li>10. Education (6),</li> <li>11. Climate change (5),</li> <li>12. Pneumonia (5),</li> <li>13. Breastfeeding (4),</li> <li>14. Cancer (4),</li> <li>15. Measles (4),</li> <li>16. Polio (4),</li> <li>17. Tuberculosis (4),</li> <li>18. Vaccines (4),</li> <li>19. Access (3),</li> <li>20. Agriculture (3),</li> <li>21. Cholera (3),</li> <li>22. Human Rights (3),</li> <li>23. Mothers (3),</li> <li>24. Refugees (3),</li> <li>25. Treatment (3),</li> <li>26. Violence (3),</li> <li>27. FGM (2),</li> <li>28. Hepatitis (2),</li> <li>29. Influenza (2),</li> <li>30. Innovation (2),</li> <li>31. Poverty (2),</li> <li>32. Prevention (2),</li> <li>33. Sanitation (2),</li> <li>34. Testing (2)</li> </ol> | <p>Health for all and the right to highest attainable standard of health.</p> <p>9 important target areas under SDG 3.</p> | <p>HIV/AIDS, child and maternal health, and infectious diseases are consistent across DAH data and tweets.</p> <p>To maximize benefits of the pre-determined goal of “health for all” and “SDG3: good health and well-being”, the global health system prioritizes 3 of the 9 target areas of SDG 3: HIV/AIDS, child and maternal health, and infectious diseases.</p> <p><b>Note:</b> These benefit-maximizing priorities are the same top priorities of the three funding organizations.</p> | <p>Yes</p>                                                                                                                                                                                 |

1  
2  
3  
4  
5  
6  
7  
8  
9  
10  
11  
12  
13  
14  
15  
16  
17  
18  
19  
20  
21  
22  
23  
24  
25  
26  
27  
28  
29  
30  
31  
32  
33  
34  
35  
36  
37  
38  
39  
40  
41  
42  
43  
44  
45  
46  
47  
48  
49  
50  
51  
52  
53  
54  
55  
56  
57  
58  
59  
60

|  |                                                                                                                                                                                                                                                                                                                                                                                                                                                                                                                                                                                                                                                                               |  |  |  |  |  |  |
|--|-------------------------------------------------------------------------------------------------------------------------------------------------------------------------------------------------------------------------------------------------------------------------------------------------------------------------------------------------------------------------------------------------------------------------------------------------------------------------------------------------------------------------------------------------------------------------------------------------------------------------------------------------------------------------------|--|--|--|--|--|--|
|  | <p><b>sexual and reproductive health-care services</b>, including for family planning, information and education, and the integration of reproductive health into national strategies and programmes (3.7)</p> <ul style="list-style-type: none"> <li>• Achieve <b>universal health coverage</b>, including financial risk protection, access to quality essential health-care services and access to safe, effective, quality and affordable essential medicines and vaccines for all (3.8)</li> <li>• By 2030, substantially reduce the number of <b>deaths and illnesses from hazardous chemicals and air, water and soil pollution and contamination</b> (3.9)</li> </ul> |  |  |  |  |  |  |
|--|-------------------------------------------------------------------------------------------------------------------------------------------------------------------------------------------------------------------------------------------------------------------------------------------------------------------------------------------------------------------------------------------------------------------------------------------------------------------------------------------------------------------------------------------------------------------------------------------------------------------------------------------------------------------------------|--|--|--|--|--|--|

**Supplementary Table 2. Breakdown of Collected Tweets by Actor and Month.** Total tweets and average tweets per month for each of the 20 global health actors.

| Global Health Actor                                        | Total Tweets  | Average Tweets per Month |
|------------------------------------------------------------|---------------|--------------------------|
| World Health Organization                                  | 10,827        | 722                      |
| Oxfam International                                        | 5,694         | 380                      |
| Doctors Without Borders (MSF)                              | 5,553         | 370                      |
| UN Children's Fund (UNICEF)                                | 5,395         | 360                      |
| World Bank                                                 | 5,365         | 358                      |
| UN Development Programme (UNDP)                            | 4,912         | 327                      |
| UN Population Fund (UNFPA)                                 | 3,908         | 261                      |
| UK Department of International Development                 | 3,823         | 255                      |
| Centers for Disease Control and Prevention (CDC)           | 3,701         | 247                      |
| United States Agency for International Development (USAID) | 3,604         | 240                      |
| Food and Agriculture Organization (FAO)                    | 3,263         | 218                      |
| Save the Children                                          | 3,121         | 208                      |
| Gavi, the Vaccine Alliance                                 | 2,739         | 183                      |
| National Institutes of Health (NIH)                        | 2,664         | 178                      |
| Joint UN Programme on HIV/AIDS (UNAIDS)                    | 2,214         | 148                      |
| PATH                                                       | 1,954         | 130                      |
| Global Fund                                                | 1,727         | 115                      |
| European Centre for Disease Prevention and Control (ECDC)  | 1,311         | 87                       |
| Gates Foundation                                           | 1,249         | 83                       |
| Unitaid                                                    | 1,217         | 81                       |
| <b>Total</b>                                               | <b>74,241</b> | <b>4,949</b>             |

**Supplementary Table 3. Breakdown of Collected Tweets by Year and Month** Tweets per month and per year for all the tweets collected.

|              | Tweets per Month | Tweets per Year |
|--------------|------------------|-----------------|
| 2016         |                  | 5,973           |
| November     | 5,973            |                 |
| 2017         |                  | 21,193          |
| February     | 4,474            |                 |
| May          | 5,582            |                 |
| August       | 5,103            |                 |
| November     | 6,034            |                 |
| 2018         |                  | 18,562          |
| February     | 4,145            |                 |
| May          | 4,965            |                 |
| August       | 4,205            |                 |
| November     | 5,247            |                 |
| 2019         |                  | 17,884          |
| February     | 4,500            |                 |
| May          | 4,886            |                 |
| August       | 3,987            |                 |
| November     | 4,511            |                 |
| 2020         |                  | 10,629          |
| February     | 4,446            |                 |
| May          | 6,183            |                 |
| <b>Total</b> | <b>74,241</b>    | <b>74,241</b>   |

**Supplementary Table 4. Priority Similarity Matrix** Scores are generated by comparing the list of 10 health priorities of actor A with that of actor B and the number of matching priorities is counted. Topic similarity scores range from 0-10.

|                   | USA | UK | BMGF | WHO | World Bank | UNAIDS | UNFPA | UNICEF | UNITAID | GAVI | Oxfam | Global Fund | CDC | EU CDC | NIH | FAO | UNDP | MSF | PATH | Save the Children |
|-------------------|-----|----|------|-----|------------|--------|-------|--------|---------|------|-------|-------------|-----|--------|-----|-----|------|-----|------|-------------------|
| USA               |     | 7  | 6    | 5   | 6          | 3      | 4     | 4      | 2       | 2    | 5     | 4           | 3   | 1      | 2   | 3   | 7    | 4   | 2    | 6                 |
| UK                | 7   |    | 4    | 4   | 6          | 2      | 3     | 5      | 2       | 3    | 5     | 4           | 2   | 2      | 2   | 4   | 6    | 5   | 3    | 6                 |
| BMGF              | 6   | 4  |      | 8   | 4          | 3      | 3     | 4      | 3       | 3    | 3     | 6           | 2   | 1      | 2   | 1   | 6    | 3   | 4    | 3                 |
| WHO               | 5   | 4  | 8    |     | 3          | 3      | 3     | 4      | 3       | 5    | 4     | 7           | 3   | 3      | 2   | 1   | 5    | 4   | 5    | 2                 |
| World Bank        | 6   | 6  | 4    | 3   |            | 2      | 4     | 4      | 1       | 3    | 6     | 3           | 3   | 0      | 1   | 5   | 6    | 3   | 2    | 5                 |
| UNAIDS            | 3   | 2  | 3    | 3   | 2          |        | 3     | 2      | 4       | 1    | 2     | 3           | 2   | 1      | 2   | 1   | 3    | 3   | 3    | 1                 |
| UNFPA             | 4   | 3  | 3    | 3   | 4          | 3      |       | 4      | 1       | 2    | 3     | 3           | 2   | 0      | 1   | 1   | 4    | 4   | 2    | 3                 |
| UNICEF            | 4   | 5  | 4    | 4   | 4          | 2      | 4     |        | 1       | 3    | 4     | 3           | 2   | 1      | 1   | 3   | 5    | 4   | 4    | 4                 |
| UNITAID           | 2   | 2  | 3    | 3   | 1          | 4      | 1     | 1      |         | 3    | 1     | 4           | 2   | 3      | 2   | 0   | 3    | 4   | 5    | 1                 |
| GAVI              | 2   | 3  | 3    | 5   | 3          | 1      | 2     | 3      | 3       |      | 3     | 6           | 3   | 2      | 2   | 1   | 2    | 4   | 5    | 2                 |
| Oxfam             | 5   | 5  | 3    | 4   | 6          | 2      | 3     | 4      | 1       | 3    |       | 5           | 2   | 1      | 1   | 4   | 6    | 4   | 3    | 5                 |
| Global Fund       | 4   | 4  | 6    | 7   | 3          | 3      | 3     | 3      | 4       | 6    | 5     |             | 2   | 3      | 2   | 1   | 5    | 6   | 4    | 2                 |
| CDC               | 3   | 2  | 2    | 3   | 3          | 2      | 2     | 2      | 2       | 3    | 2     | 2           |     | 2      | 0   | 1   | 3    | 1   | 2    | 2                 |
| EU CDC            | 1   | 2  | 1    | 3   | 0          | 1      | 0     | 1      | 3       | 2    | 1     | 3           | 2   |        | 1   | 0   | 1    | 3   | 1    | 0                 |
| NIH               | 2   | 2  | 2    | 2   | 1          | 2      | 1     | 1      | 2       | 2    | 1     | 2           | 0   | 1      |     | 1   | 2    | 2   | 2    | 1                 |
| FAO               | 3   | 4  | 1    | 1   | 5          | 1      | 1     | 3      | 0       | 1    | 4     | 1           | 1   | 0      | 1   |     | 4    | 1   | 1    | 3                 |
| UNDP              | 7   | 6  | 6    | 5   | 6          | 3      | 4     | 5      | 3       | 2    | 6     | 5           | 3   | 1      | 2   | 4   |      | 3   | 3    | 5                 |
| MSF               | 4   | 5  | 3    | 4   | 3          | 3      | 4     | 4      | 4       | 4    | 4     | 6           | 1   | 3      | 2   | 1   | 3    |     | 3    | 4                 |
| PATH              | 2   | 3  | 4    | 5   | 2          | 3      | 2     | 4      | 5       | 5    | 3     | 4           | 2   | 1      | 2   | 1   | 3    | 3   |      | 3                 |
| Save the Children | 6   | 6  | 3    | 2   | 5          | 1      | 3     | 4      | 1       | 2    | 5     | 2           | 2   | 0      | 1   | 3   | 5    | 4   | 3    |                   |

**Supplementary Table 5. Types of Power.** A summary of the four types of power as presented by Barnett and Duvall (2005) with examples in global health.

| Power Type          | Relational specificity | Power works through...           | Definition according to Barnett & Duvall (2005)                                                                          | Global Health Example                                                                                                                                            |
|---------------------|------------------------|----------------------------------|--------------------------------------------------------------------------------------------------------------------------|------------------------------------------------------------------------------------------------------------------------------------------------------------------|
| Compulsory Power    | Direct                 | Interactions of specific actors  | "Direct control of one actor over the conditions of existence or the actions of another." (p. 48)                        | Donor countries dictate the conditions in low and middle-income countries (LMICs) through dictating requirements in development aid.                             |
| Institutional Power | Diffuse                | Interactions of specific actors  | "Control actors exercise indirectly over others through diffuse relations of interactions." (p. 43)                      | High-income countries control funding allocations for LMICs through institutional power via their contributions to the WHO and other multilateral organizations. |
| Structural Power    | Direct                 | Social relations of constitution | "Constitution of subjects' capacities in direct structural relation to one another." (p. 43)                             | The structural and historical disempowerment of indigenous populations have resulted in their disproportionate outcomes in health.                               |
| Productive Power    | Diffuse                | Social relations of constitution | "Power [that] works through diffuse constitutive relations to produce the situated social capacities of actors." (p. 48) | High-income countries direct what research institutions prioritize and study, and ultimately determine what health issues are addressed.                         |



## SUPPLEMENTARY MATERIALS

### Materials and Methods

#### *Rationale for choosing the 20 global health actors*

1. Hoffman & Cole (2018), Frenk & Moon (2013), and Szlezak et al. (2010) were the basis for the 20 global health actors in this study.[4, 15, 16]
  - a. Hoffman & Cole (2018) used the related search function in Google in order to systematically map global health actors – 20 global health actors were identified as most important based on their methodology and was validated by 9 identified global health experts.
  - b. Frenk & Moon (2013) identifies 9 primary types of actors in global health with 24 examples in their study on pluralism and other challenges in global health.
  - c. Zlezak et al. (2010) describes their 8 identified types of actors in global health as a partnership in their article that argues for the norms and roles of each actor in the transition of global health.
2. The identified global health actors across the 3 studies were compared, and the 20 actors that were identified most important by all 3 studies were chosen.

#### *Collection of tweets*

1. Twitter is one of the social media platforms where global health actors actively and consistently share their work, research, and news to the general global public.
2. Using the [Twitter Application Programming Interface \(API\)](#), tweets from of the 20 global health actors were collected from November 2016 to May 2020 in three month intervals.
  - a. All the tweets of each of the 20 global health actors were collected for the following 15 months:
    - i. 2016: November
    - ii. 2017: February, May, August, November
    - iii. 2018: February, May, August, November
    - iv. 2019: February, May, August, November
    - v. 2020: February, May
  - b. November 2019 is the identified beginning of the COVID-19 outbreak.
  - c. This scope allows an analysis of tweets of global health actors 3 years leading up to the COVID-19 outbreak and 6-months into the pandemic.
3. Three month intervals were chosen with the assumption that a variance in the issues, topics, and themes that global health actors tweet can be seen in three month intervals while allowing for efficient usage of the request limit from the Twitter API.

#### *Topic modelling*

1. Topic Modeling was conducted to identify the 10 most tweeted global health issues/topics by each actor in each of the 15 months in the study.

- 1
  - 2
  - 3
  - 4
  - 5
  - 6
  - 7
  - 8
  - 9
  - 10
  - 11
  - 12
  - 13
  - 14
  - 15
  - 16
  - 17
  - 18
  - 19
  - 20
  - 21
  - 22
  - 23
  - 24
  - 25
  - 26
  - 27
  - 28
  - 29
  - 30
  - 31
  - 32
  - 33
  - 34
  - 35
  - 36
  - 37
  - 38
  - 39
  - 40
  - 41
  - 42
  - 43
  - 44
  - 45
  - 46
  - 47
  - 48
  - 49
  - 50
  - 51
  - 52
  - 53
  - 54
  - 55
  - 56
  - 57
  - 58
  - 59
  - 60
2. The 10 most tweeted global health issues/topics were used to describe the set of issues/problems a specific global health actor prioritizes in a given month.
  3. [Latent Dirichlet Allocation \(LDA\)](#) was used in topic modeling.
  4. Topic modeling answers the questions:
    - a. “What are the most prioritized issues among the identified global health actors from 2016 to 2020?”
    - b. “When did global health actors have pandemic preparedness as a priority in the three years leading up to the COVID-19 pandemic?”
    - c. “What are the trends in prioritization of global health issues between and among different types of global health actors?”

#### *FAQs about how LDA was used in this study*

- What did the authors do with tweets that mentioned both “breastfeeding” and “mothers”? Do the authors believe that the revealed priorities of an organization that references both breastfeeding and mothers are substantively different than those of an organization that just references breastfeeding, and so on?
  - For context, LDA topic modeling is a form of “unsupervised machine learning” where the data used is “unlabeled.” This means that when we ran the algorithm, we did not define what statements will be categorized as “breastfeeding” and what will be categorized as “mothers.” We also did not define what words would fall under any other topics that were generated by the model. The only input from us is was how many topics we want the LDA algorithm to categorize the corpus of text. In our analysis, we generated 10 topics for each of the 20 actors. The LDA algorithm generates topics based on a generative probabilistic model that assumes each topic is a mixture over an underlying set of words, and each corpus of text is a mixture of sets of topic probabilities. In a nutshell, the algorithm analyzes all the words in all the tweets of a specific actor. It then generates probabilities of each unique word appearing with other words in a certain tweet or sentence. Topics are then generated by the model based on these sets of probabilities.
- Some topics are quite general (e.g., “Poverty”, “Treatment”, “News”), while others are more specific (“Fisheries”, “Hepatitis”, “Veterans”). In cases where one topic could be subsumed by another (e.g., “Schools” could be subsumed by “Education”), how did the authors disaggregate these?
  - We did not have any input in categorizing any of the topics generated. The topics generated are based on the words and language used by each respective actor in their tweets. The algorithm uses the words/language used by the actor in their tweets to generate topics. We did not make any other edits to the topics after they were generated.

#### *Code for collecting tweets*

```
# CREDENTIALS
import yaml

config = dict(
    search_tweets_api = dict(
        account_type = 'premium',
        endpoint = 'https://api.twitter.com/1.1/tweets/search/fullarchive/datacollection.json',
```

```

1
2
3         consumer_key = 'xxxxxxxxxxxxxxxxxxxxxxxxxxxxxxxx',
4         consumer_secret = 'xxxxxxxxxxxxxxxxxxxxxxxxxxxxxxxx'
5     )
6
7 with open('twitter_keys_fullarchive.yaml', 'w') as config_file:
8     yaml.dump(config, config_file, default_flow_style=False)
9
10 # LOAD CREDENTIALS
11 from searchtweets import load_credentials
12
13 premium_search_args = load_credentials("twitter_keys_fullarchive.yaml",
14                                     yaml_key="search_tweets_api",
15                                     env_overwrite=False)
16
17 print(premium_search_args)
18
19 # QUERY RULE SET UP
20 from searchtweets import gen_rule_payload
21
22 rule = gen_rule_payload("from:username",
23                       results_per_call=500,
24                       from_date="2020-02-01",
25                       to_date="2020-03-01"
26                       )
27
28 # WRITE TO JSONL config_file
29 import json
30
31 with open('tweets_feb_2020.jsonl', 'a', encoding='utf-8') as f:
32     n = 0
33     for tweet in rs.stream():
34         n += 1
35         if n % 10 == 0:
36             print('{0}: {1}'.format(str(n), tweet['created_at']))
37             json.dump(tweet, f)
38             f.write('\n')
39     print('done')
40
41 # REPEAT FOR OTHER USERS AND MONTHS

```

### *Code for topic modelling*

```

33 # Importing modules
34
35 import pandas as pd
36
37 # Read data into tweets_df
38 tweets_df = pd.read_csv('tweets_nov2016-may2020.csv')
39
40 # Print head
41 tweets_df.head()
42
43 # Remove the columns
44 tweets_df = tweets_df[["username", "user_id", "created_at", "tweet"]]
45
46 # Print out the first rows of tweets_df
47 tweets_df.head()
48
49 # Create dataframe for each month in analysis
50 tweets_feb = tweets.loc[tweets.created_at.str.contains("Feb")]
51 tweets_feb_17 = tweets_feb.loc[tweets_feb.created_at.str.contains("2017")]
52 tweets_feb_18 = tweets_feb.loc[tweets_feb.created_at.str.contains("2018")]
53 tweets_feb_19 = tweets_feb.loc[tweets_feb.created_at.str.contains("2019")]
54 tweets_feb_20 = tweets_feb.loc[tweets_feb.created_at.str.contains("2020")]
55
56 tweets_may = tweets.loc[tweets.created_at.str.contains("May")]
57 tweets_may_17 = tweets_may.loc[tweets_may.created_at.str.contains("2017")]
58 tweets_may_18 = tweets_may.loc[tweets_may.created_at.str.contains("2018")]
59 tweets_may_19 = tweets_may.loc[tweets_may.created_at.str.contains("2019")]
60 tweets_may_20 = tweets_may.loc[tweets_may.created_at.str.contains("2020")]
61
62 tweets_aug = tweets.loc[tweets.created_at.str.contains("Aug")]
63 tweets_aug_17 = tweets_aug.loc[tweets_aug.created_at.str.contains("2017")]
64 tweets_aug_18 = tweets_aug.loc[tweets_aug.created_at.str.contains("2018")]
65 tweets_aug_19 = tweets_aug.loc[tweets_aug.created_at.str.contains("2019")]

```

```

1
2
3 tweets_nov = tweets.loc[tweets.created_at.str.contains("Nov")]
4 tweets_nov_16 = tweets_nov.loc[tweets_nov.created_at.str.contains("2016")]
5 tweets_nov_17 = tweets_nov.loc[tweets_nov.created_at.str.contains("2017")]
6 tweets_nov_18 = tweets_nov.loc[tweets_nov.created_at.str.contains("2018")]
7 tweets_nov_19 = tweets_nov.loc[tweets_nov.created_at.str.contains("2019")]
8
9 # Helper function
10 def plot_10_most_common_words(count_data, count_vectorizer):
11     import matplotlib.pyplot as plt
12     words = count_vectorizer.get_feature_names()
13     total_counts = np.zeros(len(words))
14     for t in count_data:
15         total_counts+=t.toarray()[0]
16
17     count_dict = (zip(words, total_counts))
18     count_dict = sorted(count_dict, key=lambda x:x[1], reverse=True)[1:23]
19     words = [w[0] for w in count_dict]
20     counts = [w[1] for w in count_dict]
21     x_pos = np.arange(len(words))
22
23     plt.figure(2, figsize=(15, 2))
24     plt.subplot(title=f'10 Most Common Words')
25     sns.set_context("notebook", font_scale=1.25, rc={"lines.linewidth": 2.5})
26     sns.barplot(x_pos, counts, palette='husl')
27     plt.xticks(x_pos, words, rotation=90)
28     plt.xlabel('words')
29     plt.ylabel('counts')
30     plt.show()
31
32 # Import Libraries
33 from sklearn.feature_extraction.text import CountVectorizer
34 import numpy as np
35
36 import matplotlib.pyplot as plt
37 import seaborn as sns
38
39 import re
40 import string
41
42 # Identify top 10 keywords, issues, topics of each actor for a given month
43 tweets = tweets_nov_16[tweets_nov_16["username"] == username]
44 tweets = tweets_df[tweets_df['username'].isin(username)]
45 printable = set(string.printable)
46 tweets['paper_text_processed'] = tweets['tweet'].map(lambda x: re.sub('[,\.\!?\']', '', x))
47 tweets['paper_text_processed'] = tweets['tweet'].map(lambda x: x.encode('ascii', 'ignore'))
48 exclusionList = ['amp', 'https', 'RT', 'people', 'know', 'living', 'new', '2018', 'latest', 'use', 'week',
49                 'ECDC_EU', 'thank', 'Thank', 'DYK', 'USAID', 'today', 'world', 'million', 'country',
50                 'foreignoffice', 'UK', 'billgates', 'melindagates', '2019', 'des', '33', 'DFID',
51                 '000', 'day', 'like', 'year', 'old', 'live', 'UNITAID', 'PATHtweets', 'PATH', 'para',
52                 'WorldBank', 'LIVE', 'WHOAFRO', 'WHOWPRO', 'WHOSEARO', 'WHOEMRO', 'GlobalFund', 'WHO_Europe', 'la'
53                 ]
54 exclusions = '|'.join(exclusionList)
55 tweets['paper_text_processed'] = tweets['tweet'].map(lambda x: re.sub(exclusions, '', x))
56 tweets['paper_text_processed'] = tweets['paper_text_processed'].map(lambda x: x.lower())
57 tweets['paper_text_processed'].head()
58 sns.set_style('whitegrid')
59 %matplotlib inline
60 count_vectorizer = CountVectorizer(stop_words='english')
61 count_data = count_vectorizer.fit_transform(tweets['paper_text_processed'])
62 import warnings
63 warnings.simplefilter("ignore")
64 plot_10_most_common_words(count_data, count_vectorizer)
65
66 # LDA Topic Modeling
67 import warnings
68 warnings.simplefilter("ignore", DeprecationWarning)
69 # Load the LDA model from sk-learn
70 from sklearn.decomposition import LatentDirichletAllocation as LDA
71
72 # Helper function
73 def print_topics(model, count_vectorizer, n_top_words):
74     words = count_vectorizer.get_feature_names()
75     for topic_idx, topic in enumerate(model.components_):
76         print("\nTopic #{}: {}".format(topic_idx,
77                                       " ".join([words[i]
78                                                 for i in topic.argsort()[::-n_top_words - 1:-1]])))
79
80 # Tweak the two parameters below
81 number_topics = 5

```

```

1
2
3 number_words = 10
4 # Create and fit the LDA model
5 lda = LDA(n_components=number_topics, n_jobs=-1)
6 lda.fit(count_data)
7 # Print the topics found by the LDA model
8 print("Topics found via LDA:")
9 print_topics(lda, count_vectorizer, number_words)

```

### How network maps were analyzed

- **What is network analysis?** Network analysis is an analytic method that has proved to be useful in understanding relational dynamics across actors in global and public health. (Lopreite et al. 2021 and Quisell et al. 2018).
- **Why use network analysis for the study?** Network analysis was conducted to observe the funding relationships between global health actors.
- **What tool was used?** Gephi 0.9.2 was used in constructing and analyzing the network map.
- **How was the network map designed?**
  - The network modelled in the study allows for a graphical visualization of the flows of global health funding in 2019.
  - The network map was designed such that each global health actor is represented by a node and lines or “edges” indicate a flow of funding in global health.
  - The Fruchterman-Reingold algorithm was used in modelling the network map.
    - The algorithm “calculates the optimal layout so that nodes with less strength and less connections are placed further apart, and those with more and/or stronger connections are placed closer to each other.”[18]
    - The thickness of edges represents the amount of funding transferred between actors.
    - The modelled network map can be found and will be discussed in the findings section.

### DAH funding data network analysis summary statistics

| Network Overview     |         |     |   |
|----------------------|---------|-----|---|
| Average Degree       | 25.403  | Run | ? |
| Avg. Weighted Degree | 254.124 | Run | ? |
| Network Diameter     | 4       | Run | ? |
| Graph Density        | 0.113   | Run | ? |
| HITS                 |         | Run | ? |
| Modularity           | 0.093   | Run | ? |
| PageRank             |         | Run | ? |
| Connected Components | 1       | Run | ? |

### Twitter data network analysis summary statistics

| Network Overview     |       |     |   |
|----------------------|-------|-----|---|
| Average Degree       | 2.181 | Run | ? |
| Avg. Weighted Degree | 4.614 | Run | ? |
| Network Diameter     | 3     | Run | ? |
| Graph Density        | 0.027 | Run | ? |
| HITS                 |       | Run | ? |
| Modularity           | 0.172 | Run | ? |
| PageRank             |       | Run | ? |
| Connected Components | 14    | Run | ? |

### DAH funding data network analysis statistics report

| Label                    | indegree | outdegree | Degree | weighted indegree | weighted outdegree | Weighted Degree | Eccentricity | closenesscentrality | harmonicclosenesscentrality | betweennesscentrality | modularity_class | strongcompnum |
|--------------------------|----------|-----------|--------|-------------------|--------------------|-----------------|--------------|---------------------|-----------------------------|-----------------------|------------------|---------------|
| African Development Bank | 25       | 57        | 82     | 1149              | 1149               | 2298            | 1            | 1.00                | 1.00                        | 54.18                 | 1                | 57            |
| Asian Development Bank   | 26       | 48        | 74     | 723               | 723                | 1446            | 3            | 0.42                | 0.53                        | 52.20                 | 0                | 160           |
| United Arab Emirates     | 1        | 79        | 80     | 79                | 79                 | 158             | 1            | 1.00                | 1.00                        | 7.28                  | 2                | 161           |
| Australia                | 1        | 151       | 152    | 137               | 1021               | 1158            | 2            | 0.85                | 0.91                        | 0.00                  | 2                | 175           |
| Austria                  | 1        | 128       | 129    | 112               | 1083               | 1195            | 2            | 0.76                | 0.85                        | 0.00                  | 0                | 179           |
| Belgium                  | 1        | 140       | 141    | 123               | 1278               | 1401            | 2            | 0.80                | 0.87                        | 0.00                  | 0                | 181           |
| Canada                   | 1        | 163       | 164    | 146               | 1564               | 1710            | 2            | 0.89                | 0.94                        | 0.00                  | 2                | 183           |
| Switzerland              | 1        | 138       | 139    | 124               | 866                | 990             | 2            | 0.82                | 0.89                        | 0.00                  | 2                | 184           |
| China                    | 39       | 12        | 51     | 251               | 380                | 631             | 2            | 0.52                | 0.53                        | 661.00                | 1                | 160           |
| Germany                  | 1        | 165       | 166    | 147               | 1476               | 1623            | 2            | 0.90                | 0.94                        | 0.00                  | 0                | 185           |
| Denmark                  | 1        | 131       | 132    | 115               | 1229               | 1344            | 2            | 0.77                | 0.85                        | 0.00                  | 0                | 186           |
| Spain                    | 1        | 152       | 153    | 134               | 1498               | 1632            | 2            | 0.84                | 0.91                        | 0.00                  | 0                | 188           |
| Finland                  | 1        | 160       | 161    | 144               | 1210               | 1354            | 2            | 0.88                | 0.93                        | 0.00                  | 0                | 189           |
| France                   | 1        | 172       | 173    | 154               | 1466               | 1620            | 2            | 0.92                | 0.96                        | 0.00                  | 0                | 192           |
| United Kingdom           | 1        | 168       | 169    | 150               | 1552               | 1702            | 2            | 0.91                | 0.95                        | 0.00                  | 0                | 193           |
| Greece                   | 1        | 148       | 149    | 133               | 1031               | 1164            | 2            | 0.83                | 0.90                        | 0.00                  | 0                | 194           |
| Ireland                  | 1        | 120       | 121    | 104               | 1081               | 1185            | 2            | 0.74                | 0.82                        | 0.00                  | 2                | 195           |
| Italy                    | 1        | 160       | 161    | 143               | 1433               | 1576            | 2            | 0.88                | 0.93                        | 0.00                  | 0                | 196           |
| Japan                    | 1        | 169       | 170    | 155               | 1111               | 1266            | 2            | 0.94                | 0.97                        | 0.00                  | 2                | 198           |
| Korea                    | 1        | 138       | 139    | 125               | 876                | 1001            | 2            | 0.82                | 0.89                        | 0.00                  | 2                | 199           |
| Luxembourg               | 1        | 130       | 131    | 114               | 1124               | 1238            | 2            | 0.77                | 0.85                        | 0.00                  | 2                | 200           |

1  
2  
3  
4  
5  
6  
7  
8  
9  
10  
11  
12  
13  
14  
15  
16  
17  
18  
19  
20  
21  
22  
23  
24  
25  
26  
27  
28  
29  
30  
31  
32  
33  
34  
35  
36  
37  
38  
39  
40  
41  
42  
43  
44  
45  
46  
47  
48  
49  
50  
51  
52  
53  
54  
55  
56  
57  
58  
59  
60

|                                                 |    |     |     |      |      |      |   |      |      |        |   |     |
|-------------------------------------------------|----|-----|-----|------|------|------|---|------|------|--------|---|-----|
| Netherlands                                     | 1  | 158 | 159 | 142  | 1380 | 1522 | 2 | 0.87 | 0.93 | 0.00   | 0 | 201 |
| Norway                                          | 1  | 157 | 158 | 138  | 1221 | 1359 | 2 | 0.86 | 0.92 | 0.00   | 2 | 203 |
| New Zealand                                     | 1  | 129 | 130 | 118  | 633  | 751  | 2 | 0.78 | 0.86 | 0.00   | 3 | 204 |
| Portugal                                        | 1  | 73  | 74  | 57   | 885  | 942  | 3 | 0.62 | 0.69 | 0.00   | 0 | 205 |
| Sweden                                          | 1  | 155 | 156 | 139  | 1464 | 1603 | 2 | 0.86 | 0.92 | 0.00   | 0 | 206 |
| United States                                   | 1  | 165 | 166 | 150  | 1390 | 1540 | 2 | 0.92 | 0.96 | 0.00   | 2 | 207 |
| Bill & Melinda Gates Foundation                 | 1  | 162 | 163 | 146  | 1280 | 1426 | 2 | 0.89 | 0.94 | 0.00   | 1 | 208 |
| Coalition for Epidemic Preparedness Innovations | 10 | 1   | 11  | 10   | 10   | 20   | 1 | 1.00 | 1.00 | 0.23   | 1 | 163 |
| European Commission                             | 15 | 148 | 163 | 2184 | 2184 | 4368 | 3 | 0.83 | 0.92 | 53.93  | 0 | 178 |
| European Economic Area                          | 3  | 7   | 10  | 17   | 17   | 34   | 1 | 1.00 | 1.00 | 8.85   | 2 | 202 |
| Gavi                                            | 28 | 118 | 146 | 2024 | 2024 | 4048 | 3 | 0.65 | 0.81 | 110.05 | 1 | 160 |
| Global Fund                                     | 29 | 155 | 184 | 4119 | 4119 | 8238 | 3 | 0.91 | 0.96 | 336.01 | 2 | 160 |
| Inter-American Development Bank                 | 15 | 34  | 49  | 269  | 269  | 538  | 1 | 1.00 | 1.00 | 49.50  | 2 | 119 |
| International NGOs                              | 27 | 151 | 178 | 2323 | 2323 | 4646 | 3 | 0.86 | 0.94 | 198.03 | 2 | 171 |
| US NGOs                                         | 27 | 158 | 185 | 442  | 442  | 884  | 3 | 0.90 | 0.95 | 306.65 | 1 | 174 |
| Pan American Health Organization                | 23 | 44  | 67  | 318  | 318  | 636  | 3 | 0.41 | 0.52 | 28.46  | 2 | 162 |
| UNAIDS                                          | 30 | 133 | 163 | 612  | 612  | 1224 | 3 | 0.73 | 0.87 | 198.05 | 1 | 160 |
| UNFPA                                           | 30 | 141 | 171 | 1630 | 1630 | 3260 | 3 | 0.79 | 0.90 | 226.79 | 0 | 160 |
| UNICEF                                          | 30 | 146 | 176 | 1913 | 1913 | 3826 | 3 | 0.83 | 0.92 | 250.51 | 1 | 160 |
| UNITAID                                         | 9  | 2   | 11  | 14   | 14   | 28   | 1 | 1.00 | 1.00 | 0.28   | 1 | 187 |
| US Foundations                                  | 1  | 164 | 165 | 164  | 164  | 328  | 3 | 0.92 | 0.96 | 23.90  | 1 | 210 |
| World Bank                                      | 21 | 129 | 150 | 1134 | 1134 | 2268 | 3 | 0.71 | 0.85 | 32.25  | 0 | 176 |
| WB_IBRD                                         | 20 | 153 | 173 | 1369 | 1369 | 2738 | 3 | 0.84 | 0.93 | 247.82 | 0 | 169 |
| WB_IDA                                          | 27 | 117 | 144 | 2596 | 2596 | 5192 | 3 | 0.64 | 0.81 | 163.51 | 3 | 160 |
| WHO                                             | 29 | 154 | 183 | 2476 | 2476 | 4952 | 3 | 0.90 | 0.95 | 314.53 | 0 | 160 |
| Corporate Donations                             | 0  | 2   | 2   | 0    | 2    | 2    | 4 | 0.48 | 0.49 | 0.00   | 1 | 211 |
| Debt Repayments                                 | 0  | 2   | 2   | 0    | 173  | 173  | 4 | 0.47 | 0.48 | 0.00   | 3 | 212 |
| Non-OECD DAC Countries                          | 0  | 17  | 17  | 0    | 710  | 710  | 2 | 0.52 | 0.55 | 0.00   | 2 | 213 |
| Other                                           | 0  | 11  | 11  | 0    | 285  | 285  | 3 | 0.52 | 0.53 | 0.00   | 2 | 214 |
| Other OECD DAC Countries                        | 0  | 8   | 8   | 0    | 220  | 220  | 3 | 0.51 | 0.52 | 0.00   | 2 | 215 |
| Private Other                                   | 0  | 14  | 14  | 0    | 941  | 941  | 3 | 0.52 | 0.54 | 0.00   | 1 | 216 |
| Unallocable                                     | 0  | 4   | 4   | 0    | 4    | 4    | 4 | 0.46 | 0.49 | 0.00   | 1 | 217 |
| Afghanistan                                     | 40 | 0   | 40  | 275  | 0    | 275  | 0 | 0.00 | 0.00 | 0.00   | 0 | 134 |
| Albania                                         | 34 | 0   | 34  | 190  | 0    | 190  | 0 | 0.00 | 0.00 | 0.00   | 3 | 122 |
| Algeria                                         | 36 | 0   | 36  | 138  | 0    | 138  | 0 | 0.00 | 0.00 | 0.00   | 2 | 3   |
| Angola                                          | 39 | 0   | 39  | 279  | 0    | 279  | 0 | 0.00 | 0.00 | 0.00   | 1 | 21  |
| Anguilla                                        | 3  | 0   | 3   | 3    | 0    | 3    | 0 | 0.00 | 0.00 | 0.00   | 2 | 170 |
| Antigua and Barbuda                             | 19 | 0   | 19  | 65   | 0    | 65   | 0 | 0.00 | 0.00 | 0.00   | 2 | 87  |
| Argentina                                       | 34 | 0   | 34  | 118  | 0    | 118  | 0 | 0.00 | 0.00 | 0.00   | 2 | 113 |
| Armenia                                         | 36 | 0   | 36  | 218  | 0    | 218  | 0 | 0.00 | 0.00 | 0.00   | 3 | 75  |
| Azerbaijan                                      | 36 | 0   | 36  | 199  | 0    | 199  | 0 | 0.00 | 0.00 | 0.00   | 3 | 74  |
| Bahrain                                         | 1  | 0   | 1   | 1    | 0    | 1    | 0 | 0.00 | 0.00 | 0.00   | 0 | 190 |
| Bangladesh                                      | 39 | 0   | 39  | 271  | 0    | 271  | 0 | 0.00 | 0.00 | 0.00   | 0 | 135 |
| Barbados                                        | 6  | 0   | 6   | 47   | 0    | 47   | 0 | 0.00 | 0.00 | 0.00   | 2 | 107 |



|    |                                  |    |   |    |     |   |     |   |      |      |      |   |     |
|----|----------------------------------|----|---|----|-----|---|-----|---|------|------|------|---|-----|
| 1  |                                  |    |   |    |     |   |     |   |      |      |      |   |     |
| 2  |                                  |    |   |    |     |   |     |   |      |      |      |   |     |
| 3  |                                  |    |   |    |     |   |     |   |      |      |      |   |     |
| 4  | Belarus                          | 30 | 0 | 30 | 119 | 0 | 119 | 0 | 0.00 | 0.00 | 0.00 | 2 | 144 |
| 5  | Belize                           | 33 | 0 | 33 | 119 | 0 | 119 | 0 | 0.00 | 0.00 | 0.00 | 2 | 94  |
| 6  | Benin                            | 39 | 0 | 39 | 273 | 0 | 273 | 0 | 0.00 | 0.00 | 0.00 | 1 | 43  |
| 7  | Bhutan                           | 34 | 0 | 34 | 163 | 0 | 163 | 0 | 0.00 | 0.00 | 0.00 | 3 | 70  |
| 8  | Bolivia                          | 38 | 0 | 38 | 180 | 0 | 180 | 0 | 0.00 | 0.00 | 0.00 | 2 | 108 |
| 9  | Bosnia and Herzegovina           | 35 | 0 | 35 | 182 | 0 | 182 | 0 | 0.00 | 0.00 | 0.00 | 3 | 121 |
| 10 | Botswana                         | 39 | 0 | 39 | 210 | 0 | 210 | 0 | 0.00 | 0.00 | 0.00 | 0 | 18  |
| 11 | Brazil                           | 37 | 0 | 37 | 131 | 0 | 131 | 0 | 0.00 | 0.00 | 0.00 | 2 | 117 |
| 12 | Bulgaria                         | 5  | 0 | 5  | 34  | 0 | 34  | 0 | 0.00 | 0.00 | 0.00 | 2 | 156 |
| 13 | Burkina Faso                     | 39 | 0 | 39 | 280 | 0 | 280 | 0 | 0.00 | 0.00 | 0.00 | 1 | 50  |
| 14 | Burundi                          | 39 | 0 | 39 | 264 | 0 | 264 | 0 | 0.00 | 0.00 | 0.00 | 1 | 19  |
| 15 | Cambodia                         | 37 | 0 | 37 | 266 | 0 | 266 | 0 | 0.00 | 0.00 | 0.00 | 0 | 130 |
| 16 | Cameroon                         | 39 | 0 | 39 | 277 | 0 | 277 | 0 | 0.00 | 0.00 | 0.00 | 1 | 37  |
| 17 | Cape Verde                       | 24 | 0 | 24 | 117 | 0 | 117 | 0 | 0.00 | 0.00 | 0.00 | 3 | 12  |
| 18 | Central African Republic         | 39 | 0 | 39 | 259 | 0 | 259 | 0 | 0.00 | 0.00 | 0.00 | 1 | 14  |
| 19 | Chad                             | 39 | 0 | 39 | 266 | 0 | 266 | 0 | 0.00 | 0.00 | 0.00 | 1 | 29  |
| 20 | Chile                            | 34 | 0 | 34 | 112 | 0 | 112 | 0 | 0.00 | 0.00 | 0.00 | 2 | 102 |
| 21 | Christmas Island                 | 1  | 0 | 1  | 1   | 0 | 1   | 0 | 0.00 | 0.00 | 0.00 | 1 | 209 |
| 22 | Colombia                         | 36 | 0 | 36 | 126 | 0 | 126 | 0 | 0.00 | 0.00 | 0.00 | 2 | 118 |
| 23 | Comoros                          | 39 | 0 | 39 | 223 | 0 | 223 | 0 | 0.00 | 0.00 | 0.00 | 3 | 5   |
| 24 | Congo                            | 39 | 0 | 39 | 249 | 0 | 249 | 0 | 0.00 | 0.00 | 0.00 | 1 | 7   |
| 25 | Cook Islands                     | 9  | 0 | 9  | 49  | 0 | 49  | 0 | 0.00 | 0.00 | 0.00 | 2 | 149 |
| 26 | Costa Rica                       | 35 | 0 | 35 | 131 | 0 | 131 | 0 | 0.00 | 0.00 | 0.00 | 2 | 97  |
| 27 | Cote d'Ivoire                    | 39 | 0 | 39 | 276 | 0 | 276 | 0 | 0.00 | 0.00 | 0.00 | 1 | 20  |
| 28 | Croatia                          | 22 | 0 | 22 | 61  | 0 | 61  | 0 | 0.00 | 0.00 | 0.00 | 2 | 153 |
| 29 | Cuba                             | 36 | 0 | 36 | 166 | 0 | 166 | 0 | 0.00 | 0.00 | 0.00 | 2 | 92  |
| 30 | Czech Republic                   | 2  | 0 | 2  | 2   | 0 | 2   | 0 | 0.00 | 0.00 | 0.00 | 1 | 173 |
| 31 | Democratic Republic of the Congo | 37 | 0 | 37 | 199 | 0 | 199 | 0 | 0.00 | 0.00 | 0.00 | 1 | 46  |
| 32 | Djibouti                         | 39 | 0 | 39 | 247 | 0 | 247 | 0 | 0.00 | 0.00 | 0.00 | 1 | 25  |
| 33 | Dominica                         | 26 | 0 | 26 | 83  | 0 | 83  | 0 | 0.00 | 0.00 | 0.00 | 2 | 89  |
| 34 | Dominican Republic               | 37 | 0 | 37 | 159 | 0 | 159 | 0 | 0.00 | 0.00 | 0.00 | 2 | 112 |
| 35 | Ecuador                          | 37 | 0 | 37 | 128 | 0 | 128 | 0 | 0.00 | 0.00 | 0.00 | 2 | 106 |
| 36 | Egypt                            | 39 | 0 | 39 | 254 | 0 | 254 | 0 | 0.00 | 0.00 | 0.00 | 1 | 35  |
| 37 | El Salvador                      | 37 | 0 | 37 | 161 | 0 | 161 | 0 | 0.00 | 0.00 | 0.00 | 2 | 100 |
| 38 | Equatorial Guinea                | 38 | 0 | 38 | 197 | 0 | 197 | 0 | 0.00 | 0.00 | 0.00 | 3 | 51  |
| 39 | Eritrea                          | 39 | 0 | 39 | 255 | 0 | 255 | 0 | 0.00 | 0.00 | 0.00 | 1 | 16  |
| 40 | Estonia                          | 5  | 0 | 5  | 31  | 0 | 31  | 0 | 0.00 | 0.00 | 0.00 | 2 | 154 |
| 41 | Ethiopia                         | 39 | 0 | 39 | 288 | 0 | 288 | 0 | 0.00 | 0.00 | 0.00 | 1 | 41  |
| 42 | Federated States of Micronesia   | 24 | 0 | 24 | 64  | 0 | 64  | 0 | 0.00 | 0.00 | 0.00 | 2 | 64  |
| 43 | Fiji                             | 26 | 0 | 26 | 81  | 0 | 81  | 0 | 0.00 | 0.00 | 0.00 | 2 | 139 |
| 44 | Gabon                            | 38 | 0 | 38 | 210 | 0 | 210 | 0 | 0.00 | 0.00 | 0.00 | 0 | 47  |
| 45 | Georgia                          | 36 | 0 | 36 | 245 | 0 | 245 | 0 | 0.00 | 0.00 | 0.00 | 3 | 81  |
| 46 | Ghana                            | 39 | 0 | 39 | 284 | 0 | 284 | 0 | 0.00 | 0.00 | 0.00 | 1 | 40  |
| 47 | Global                           | 43 | 0 | 43 | 260 | 0 | 260 | 0 | 0.00 | 0.00 | 0.00 | 1 | 6   |
| 48 |                                  |    |   |    |     |   |     |   |      |      |      |   |     |
| 49 |                                  |    |   |    |     |   |     |   |      |      |      |   |     |
| 50 |                                  |    |   |    |     |   |     |   |      |      |      |   |     |
| 51 |                                  |    |   |    |     |   |     |   |      |      |      |   |     |
| 52 |                                  |    |   |    |     |   |     |   |      |      |      |   |     |
| 53 |                                  |    |   |    |     |   |     |   |      |      |      |   |     |
| 54 |                                  |    |   |    |     |   |     |   |      |      |      |   |     |
| 55 |                                  |    |   |    |     |   |     |   |      |      |      |   |     |
| 56 |                                  |    |   |    |     |   |     |   |      |      |      |   |     |
| 57 |                                  |    |   |    |     |   |     |   |      |      |      |   |     |
| 58 |                                  |    |   |    |     |   |     |   |      |      |      |   |     |
| 59 |                                  |    |   |    |     |   |     |   |      |      |      |   |     |
| 60 |                                  |    |   |    |     |   |     |   |      |      |      |   |     |

|    |                  |    |   |    |     |   |     |   |      |      |      |   |     |
|----|------------------|----|---|----|-----|---|-----|---|------|------|------|---|-----|
| 1  |                  |    |   |    |     |   |     |   |      |      |      |   |     |
| 2  |                  |    |   |    |     |   |     |   |      |      |      |   |     |
| 3  |                  |    |   |    |     |   |     |   |      |      |      |   |     |
| 4  | Grenada          | 30 | 0 | 30 | 85  | 0 | 85  | 0 | 0.00 | 0.00 | 0.00 | 2 | 90  |
| 5  | Guatemala        | 37 | 0 | 37 | 170 | 0 | 170 | 0 | 0.00 | 0.00 | 0.00 | 2 | 115 |
| 6  | Guinea           | 39 | 0 | 39 | 270 | 0 | 270 | 0 | 0.00 | 0.00 | 0.00 | 1 | 31  |
| 7  | Guinea-Bissau    | 39 | 0 | 39 | 259 | 0 | 259 | 0 | 0.00 | 0.00 | 0.00 | 1 | 30  |
| 8  | Guyana           | 34 | 0 | 34 | 156 | 0 | 156 | 0 | 0.00 | 0.00 | 0.00 | 2 | 98  |
| 9  | Haiti            | 38 | 0 | 38 | 234 | 0 | 234 | 0 | 0.00 | 0.00 | 0.00 | 2 | 111 |
| 10 | Honduras         | 38 | 0 | 38 | 186 | 0 | 186 | 0 | 0.00 | 0.00 | 0.00 | 2 | 109 |
| 11 | Hungary          | 3  | 0 | 3  | 3   | 0 | 3   | 0 | 0.00 | 0.00 | 0.00 | 1 | 166 |
| 12 | India            | 39 | 0 | 39 | 274 | 0 | 274 | 0 | 0.00 | 0.00 | 0.00 | 0 | 136 |
| 13 | Indonesia        | 39 | 0 | 39 | 265 | 0 | 265 | 0 | 0.00 | 0.00 | 0.00 | 0 | 132 |
| 14 | Iran             | 36 | 0 | 36 | 142 | 0 | 142 | 0 | 0.00 | 0.00 | 0.00 | 2 | 73  |
| 15 | Iraq             | 37 | 0 | 37 | 195 | 0 | 195 | 0 | 0.00 | 0.00 | 0.00 | 0 | 76  |
| 16 | Jamaica          | 36 | 0 | 36 | 143 | 0 | 143 | 0 | 0.00 | 0.00 | 0.00 | 2 | 103 |
| 17 | Jordan           | 37 | 0 | 37 | 198 | 0 | 198 | 0 | 0.00 | 0.00 | 0.00 | 0 | 80  |
| 18 | Kazakhstan       | 37 | 0 | 37 | 212 | 0 | 212 | 0 | 0.00 | 0.00 | 0.00 | 3 | 78  |
| 19 | Kenya            | 39 | 0 | 39 | 285 | 0 | 285 | 0 | 0.00 | 0.00 | 0.00 | 1 | 48  |
| 20 | Kiribati         | 28 | 0 | 28 | 98  | 0 | 98  | 0 | 0.00 | 0.00 | 0.00 | 2 | 58  |
| 21 | Kosovo           | 32 | 0 | 32 | 142 | 0 | 142 | 0 | 0.00 | 0.00 | 0.00 | 3 | 143 |
| 22 | Kyrgyzstan       | 36 | 0 | 36 | 225 | 0 | 225 | 0 | 0.00 | 0.00 | 0.00 | 3 | 77  |
| 23 | Laos             | 37 | 0 | 37 | 258 | 0 | 258 | 0 | 0.00 | 0.00 | 0.00 | 0 | 127 |
| 24 | Latvia           | 5  | 0 | 5  | 7   | 0 | 7   | 0 | 0.00 | 0.00 | 0.00 | 1 | 157 |
| 25 | Lebanon          | 38 | 0 | 38 | 162 | 0 | 162 | 0 | 0.00 | 0.00 | 0.00 | 0 | 68  |
| 26 | Lesotho          | 39 | 0 | 39 | 253 | 0 | 253 | 0 | 0.00 | 0.00 | 0.00 | 1 | 22  |
| 27 | Liberia          | 39 | 0 | 39 | 269 | 0 | 269 | 0 | 0.00 | 0.00 | 0.00 | 1 | 33  |
| 28 | Libya            | 33 | 0 | 33 | 123 | 0 | 123 | 0 | 0.00 | 0.00 | 0.00 | 0 | 2   |
| 29 | Lithuania        | 5  | 0 | 5  | 7   | 0 | 7   | 0 | 0.00 | 0.00 | 0.00 | 1 | 158 |
| 30 | Macedonia        | 30 | 0 | 30 | 131 | 0 | 131 | 0 | 0.00 | 0.00 | 0.00 | 2 | 145 |
| 31 | Madagascar       | 39 | 0 | 39 | 276 | 0 | 276 | 0 | 0.00 | 0.00 | 0.00 | 1 | 38  |
| 32 | Malawi           | 39 | 0 | 39 | 277 | 0 | 277 | 0 | 0.00 | 0.00 | 0.00 | 1 | 44  |
| 33 | Malaysia         | 31 | 0 | 31 | 132 | 0 | 132 | 0 | 0.00 | 0.00 | 0.00 | 0 | 140 |
| 34 | Maldives         | 32 | 0 | 32 | 110 | 0 | 110 | 0 | 0.00 | 0.00 | 0.00 | 3 | 66  |
| 35 | Mali             | 40 | 0 | 40 | 282 | 0 | 282 | 0 | 0.00 | 0.00 | 0.00 | 1 | 45  |
| 36 | Malta            | 1  | 0 | 1  | 1   | 0 | 1   | 0 | 0.00 | 0.00 | 0.00 | 0 | 180 |
| 37 | Marshall Islands | 21 | 0 | 21 | 76  | 0 | 76  | 0 | 0.00 | 0.00 | 0.00 | 0 | 138 |
| 38 | Mauritania       | 39 | 0 | 39 | 259 | 0 | 259 | 0 | 0.00 | 0.00 | 0.00 | 1 | 34  |
| 39 | Mauritius        | 33 | 0 | 33 | 112 | 0 | 112 | 0 | 0.00 | 0.00 | 0.00 | 2 | 0   |
| 40 | Mayotte          | 1  | 0 | 1  | 1   | 0 | 1   | 0 | 0.00 | 0.00 | 0.00 | 0 | 191 |
| 41 | Mexico           | 37 | 0 | 37 | 161 | 0 | 161 | 0 | 0.00 | 0.00 | 0.00 | 2 | 114 |
| 42 | Moldova          | 33 | 0 | 33 | 185 | 0 | 185 | 0 | 0.00 | 0.00 | 0.00 | 3 | 125 |
| 43 | Mongolia         | 37 | 0 | 37 | 213 | 0 | 213 | 0 | 0.00 | 0.00 | 0.00 | 0 | 124 |
| 44 | Montenegro       | 31 | 0 | 31 | 137 | 0 | 137 | 0 | 0.00 | 0.00 | 0.00 | 3 | 142 |
| 45 | Montserrat       | 25 | 0 | 25 | 72  | 0 | 72  | 0 | 0.00 | 0.00 | 0.00 | 2 | 91  |
| 46 | Morocco          | 39 | 0 | 39 | 218 | 0 | 218 | 0 | 0.00 | 0.00 | 0.00 | 1 | 55  |
| 47 | Mozambique       | 39 | 0 | 39 | 288 | 0 | 288 | 0 | 0.00 | 0.00 | 0.00 | 1 | 36  |
| 48 |                  |    |   |    |     |   |     |   |      |      |      |   |     |
| 49 |                  |    |   |    |     |   |     |   |      |      |      |   |     |
| 50 |                  |    |   |    |     |   |     |   |      |      |      |   |     |
| 51 |                  |    |   |    |     |   |     |   |      |      |      |   |     |
| 52 |                  |    |   |    |     |   |     |   |      |      |      |   |     |
| 53 |                  |    |   |    |     |   |     |   |      |      |      |   |     |
| 54 |                  |    |   |    |     |   |     |   |      |      |      |   |     |
| 55 |                  |    |   |    |     |   |     |   |      |      |      |   |     |
| 56 |                  |    |   |    |     |   |     |   |      |      |      |   |     |
| 57 |                  |    |   |    |     |   |     |   |      |      |      |   |     |
| 58 |                  |    |   |    |     |   |     |   |      |      |      |   |     |
| 59 |                  |    |   |    |     |   |     |   |      |      |      |   |     |
| 60 |                  |    |   |    |     |   |     |   |      |      |      |   |     |

|    |                                  |    |   |    |     |   |     |   |      |      |      |   |     |
|----|----------------------------------|----|---|----|-----|---|-----|---|------|------|------|---|-----|
| 1  |                                  |    |   |    |     |   |     |   |      |      |      |   |     |
| 2  |                                  |    |   |    |     |   |     |   |      |      |      |   |     |
| 3  |                                  |    |   |    |     |   |     |   |      |      |      |   |     |
| 4  | Myanmar                          | 37 | 0 | 37 | 258 | 0 | 258 | 0 | 0.00 | 0.00 | 0.00 | 0 | 131 |
| 5  | Namibia                          | 39 | 0 | 39 | 222 | 0 | 222 | 0 | 0.00 | 0.00 | 0.00 | 1 | 17  |
| 6  | Nauru                            | 19 | 0 | 19 | 52  | 0 | 52  | 0 | 0.00 | 0.00 | 0.00 | 2 | 59  |
| 7  | Nepal                            | 39 | 0 | 39 | 265 | 0 | 265 | 0 | 0.00 | 0.00 | 0.00 | 0 | 86  |
| 8  | Netherlands Antilles             | 2  | 0 | 2  | 12  | 0 | 12  | 0 | 0.00 | 0.00 | 0.00 | 0 | 177 |
| 9  | Nicaragua                        | 37 | 0 | 37 | 201 | 0 | 201 | 0 | 0.00 | 0.00 | 0.00 | 2 | 110 |
| 10 | Niger                            | 39 | 0 | 39 | 276 | 0 | 276 | 0 | 0.00 | 0.00 | 0.00 | 1 | 42  |
| 11 | Nigeria                          | 39 | 0 | 39 | 287 | 0 | 287 | 0 | 0.00 | 0.00 | 0.00 | 1 | 52  |
| 12 | Niue                             | 18 | 0 | 18 | 64  | 0 | 64  | 0 | 0.00 | 0.00 | 0.00 | 2 | 63  |
| 13 | North Korea                      | 32 | 0 | 32 | 127 | 0 | 127 | 0 | 0.00 | 0.00 | 0.00 | 2 | 72  |
| 14 | North Korea                      | 32 | 0 | 32 | 127 | 0 | 127 | 0 | 0.00 | 0.00 | 0.00 | 2 | 72  |
| 15 | Northern Mariana Islands         | 2  | 0 | 2  | 2   | 0 | 2   | 0 | 0.00 | 0.00 | 0.00 | 2 | 197 |
| 16 | Oman                             | 5  | 0 | 5  | 5   | 0 | 5   | 0 | 0.00 | 0.00 | 0.00 | 1 | 164 |
| 17 | Oman                             | 5  | 0 | 5  | 5   | 0 | 5   | 0 | 0.00 | 0.00 | 0.00 | 1 | 164 |
| 18 | Pakistan                         | 39 | 0 | 39 | 273 | 0 | 273 | 0 | 0.00 | 0.00 | 0.00 | 0 | 137 |
| 19 | Palau                            | 18 | 0 | 18 | 50  | 0 | 50  | 0 | 0.00 | 0.00 | 0.00 | 2 | 62  |
| 20 | Palestine                        | 34 | 0 | 34 | 125 | 0 | 125 | 0 | 0.00 | 0.00 | 0.00 | 2 | 151 |
| 21 | Panama                           | 35 | 0 | 35 | 142 | 0 | 142 | 0 | 0.00 | 0.00 | 0.00 | 2 | 105 |
| 22 | Panama                           | 35 | 0 | 35 | 142 | 0 | 142 | 0 | 0.00 | 0.00 | 0.00 | 2 | 105 |
| 23 | Papua New Guinea                 | 32 | 0 | 32 | 138 | 0 | 138 | 0 | 0.00 | 0.00 | 0.00 | 0 | 128 |
| 24 | Paraguay                         | 36 | 0 | 36 | 116 | 0 | 116 | 0 | 0.00 | 0.00 | 0.00 | 2 | 95  |
| 25 | Peru                             | 37 | 0 | 37 | 131 | 0 | 131 | 0 | 0.00 | 0.00 | 0.00 | 2 | 104 |
| 26 | Philippines                      | 39 | 0 | 39 | 248 | 0 | 248 | 0 | 0.00 | 0.00 | 0.00 | 0 | 120 |
| 27 | Poland                           | 4  | 0 | 4  | 6   | 0 | 6   | 0 | 0.00 | 0.00 | 0.00 | 1 | 168 |
| 28 | Poland                           | 4  | 0 | 4  | 6   | 0 | 6   | 0 | 0.00 | 0.00 | 0.00 | 1 | 168 |
| 29 | Romania                          | 5  | 0 | 5  | 34  | 0 | 34  | 0 | 0.00 | 0.00 | 0.00 | 2 | 155 |
| 30 | Russia                           | 8  | 0 | 8  | 36  | 0 | 36  | 0 | 0.00 | 0.00 | 0.00 | 2 | 147 |
| 31 | Rwanda                           | 39 | 0 | 39 | 276 | 0 | 276 | 0 | 0.00 | 0.00 | 0.00 | 1 | 27  |
| 32 | Saint Helena                     | 33 | 0 | 33 | 130 | 0 | 130 | 0 | 0.00 | 0.00 | 0.00 | 0 | 10  |
| 33 | Saint Helena                     | 33 | 0 | 33 | 130 | 0 | 130 | 0 | 0.00 | 0.00 | 0.00 | 0 | 10  |
| 34 | Saint Kitts and Nevis            | 8  | 0 | 8  | 47  | 0 | 47  | 0 | 0.00 | 0.00 | 0.00 | 2 | 152 |
| 35 | Saint Lucia                      | 33 | 0 | 33 | 107 | 0 | 107 | 0 | 0.00 | 0.00 | 0.00 | 2 | 93  |
| 36 | Saint Vincent and the Grenadines | 32 | 0 | 32 | 95  | 0 | 95  | 0 | 0.00 | 0.00 | 0.00 | 2 | 88  |
| 37 | Samoa                            | 26 | 0 | 26 | 106 | 0 | 106 | 0 | 0.00 | 0.00 | 0.00 | 3 | 65  |
| 38 | Sao Tome and Principe            | 38 | 0 | 38 | 230 | 0 | 230 | 0 | 0.00 | 0.00 | 0.00 | 3 | 4   |
| 39 | Sao Tome and Principe            | 38 | 0 | 38 | 230 | 0 | 230 | 0 | 0.00 | 0.00 | 0.00 | 3 | 4   |
| 40 | Saudi Arabia                     | 5  | 0 | 5  | 5   | 0 | 5   | 0 | 0.00 | 0.00 | 0.00 | 1 | 172 |
| 41 | Senegal                          | 39 | 0 | 39 | 283 | 0 | 283 | 0 | 0.00 | 0.00 | 0.00 | 1 | 39  |
| 42 | Serbia                           | 35 | 0 | 35 | 167 | 0 | 167 | 0 | 0.00 | 0.00 | 0.00 | 2 | 146 |
| 43 | Seychelles                       | 33 | 0 | 33 | 97  | 0 | 97  | 0 | 0.00 | 0.00 | 0.00 | 2 | 1   |
| 44 | Sierra Leone                     | 39 | 0 | 39 | 270 | 0 | 270 | 0 | 0.00 | 0.00 | 0.00 | 1 | 49  |
| 45 | Sierra Leone                     | 39 | 0 | 39 | 270 | 0 | 270 | 0 | 0.00 | 0.00 | 0.00 | 1 | 49  |
| 46 | Slovakia                         | 2  | 0 | 2  | 2   | 0 | 2   | 0 | 0.00 | 0.00 | 0.00 | 1 | 165 |
| 47 | Slovenia                         | 8  | 0 | 8  | 8   | 0 | 8   | 0 | 0.00 | 0.00 | 0.00 | 0 | 159 |
| 48 | Solomon Islands                  | 26 | 0 | 26 | 128 | 0 | 128 | 0 | 0.00 | 0.00 | 0.00 | 3 | 82  |
| 49 | Somalia                          | 39 | 0 | 39 | 252 | 0 | 252 | 0 | 0.00 | 0.00 | 0.00 | 1 | 15  |
| 50 | South Africa                     | 39 | 0 | 39 | 260 | 0 | 260 | 0 | 0.00 | 0.00 | 0.00 | 0 | 24  |
| 51 | South Africa                     | 39 | 0 | 39 | 260 | 0 | 260 | 0 | 0.00 | 0.00 | 0.00 | 0 | 24  |
| 52 | South Korea                      | 7  | 0 | 7  | 7   | 0 | 7   | 0 | 0.00 | 0.00 | 0.00 | 0 | 167 |
| 53 | South Sudan                      | 39 | 0 | 39 | 245 | 0 | 245 | 0 | 0.00 | 0.00 | 0.00 | 1 | 13  |
| 54 | Sri Lanka                        | 37 | 0 | 37 | 231 | 0 | 231 | 0 | 0.00 | 0.00 | 0.00 | 0 | 126 |
| 55 | Sri Lanka                        | 37 | 0 | 37 | 231 | 0 | 231 | 0 | 0.00 | 0.00 | 0.00 | 0 | 126 |
| 56 | Sudan                            | 39 | 0 | 39 | 272 | 0 | 272 | 0 | 0.00 | 0.00 | 0.00 | 1 | 26  |
| 57 |                                  |    |   |    |     |   |     |   |      |      |      |   |     |
| 58 |                                  |    |   |    |     |   |     |   |      |      |      |   |     |
| 59 |                                  |    |   |    |     |   |     |   |      |      |      |   |     |
| 60 |                                  |    |   |    |     |   |     |   |      |      |      |   |     |

|    |                           |    |   |    |     |   |     |   |      |      |      |   |     |
|----|---------------------------|----|---|----|-----|---|-----|---|------|------|------|---|-----|
| 1  |                           |    |   |    |     |   |     |   |      |      |      |   |     |
| 2  |                           |    |   |    |     |   |     |   |      |      |      |   |     |
| 3  |                           |    |   |    |     |   |     |   |      |      |      |   |     |
| 4  | Suriname                  | 34 | 0 | 34 | 107 | 0 | 107 | 0 | 0.00 | 0.00 | 0.00 | 2 | 96  |
| 5  | Swaziland                 | 38 | 0 | 38 | 201 | 0 | 201 | 0 | 0.00 | 0.00 | 0.00 | 0 | 11  |
| 6  | Syria                     | 38 | 0 | 38 | 195 | 0 | 195 | 0 | 0.00 | 0.00 | 0.00 | 0 | 67  |
| 7  | Tajikistan                | 37 | 0 | 37 | 248 | 0 | 248 | 0 | 0.00 | 0.00 | 0.00 | 0 | 83  |
| 8  | Tanzania                  | 39 | 0 | 39 | 285 | 0 | 285 | 0 | 0.00 | 0.00 | 0.00 | 1 | 53  |
| 9  | Thailand                  | 38 | 0 | 38 | 193 | 0 | 193 | 0 | 0.00 | 0.00 | 0.00 | 0 | 85  |
| 10 | The Gambia                | 39 | 0 | 39 | 248 | 0 | 248 | 0 | 0.00 | 0.00 | 0.00 | 1 | 28  |
| 11 | Timor-Leste               | 37 | 0 | 37 | 231 | 0 | 231 | 0 | 0.00 | 0.00 | 0.00 | 0 | 79  |
| 12 | Togo                      | 39 | 0 | 39 | 255 | 0 | 255 | 0 | 0.00 | 0.00 | 0.00 | 1 | 9   |
| 13 | Tokelau                   | 13 | 0 | 13 | 18  | 0 | 18  | 0 | 0.00 | 0.00 | 0.00 | 2 | 148 |
| 14 | Tonga                     | 23 | 0 | 23 | 99  | 0 | 99  | 0 | 0.00 | 0.00 | 0.00 | 3 | 60  |
| 15 | Trinidad and Tobago       | 11 | 0 | 11 | 52  | 0 | 52  | 0 | 0.00 | 0.00 | 0.00 | 2 | 116 |
| 16 | Tunisia                   | 37 | 0 | 37 | 172 | 0 | 172 | 0 | 0.00 | 0.00 | 0.00 | 2 | 8   |
| 17 | Turkey                    | 29 | 0 | 29 | 142 | 0 | 142 | 0 | 0.00 | 0.00 | 0.00 | 0 | 141 |
| 18 | Turkmenistan              | 36 | 0 | 36 | 158 | 0 | 158 | 0 | 0.00 | 0.00 | 0.00 | 3 | 69  |
| 19 | Turks and Caicos Islands  | 2  | 0 | 2  | 2   | 0 | 2   | 0 | 0.00 | 0.00 | 0.00 | 2 | 182 |
| 20 | Tuvalu                    | 21 | 0 | 21 | 93  | 0 | 93  | 0 | 0.00 | 0.00 | 0.00 | 3 | 61  |
| 21 | Uganda                    | 39 | 0 | 39 | 286 | 0 | 286 | 0 | 0.00 | 0.00 | 0.00 | 1 | 54  |
| 22 | Ukraine                   | 32 | 0 | 32 | 181 | 0 | 181 | 0 | 0.00 | 0.00 | 0.00 | 0 | 123 |
| 23 | Unallocated/Unspecified   | 45 | 0 | 45 | 357 | 0 | 357 | 0 | 0.00 | 0.00 | 0.00 | 1 | 56  |
| 24 | Uruguay                   | 31 | 0 | 31 | 78  | 0 | 78  | 0 | 0.00 | 0.00 | 0.00 | 2 | 101 |
| 25 | Uzbekistan                | 35 | 0 | 35 | 253 | 0 | 253 | 0 | 0.00 | 0.00 | 0.00 | 0 | 129 |
| 26 | Vanuatu                   | 25 | 0 | 25 | 76  | 0 | 76  | 0 | 0.00 | 0.00 | 0.00 | 2 | 71  |
| 27 | Venezuela                 | 34 | 0 | 34 | 106 | 0 | 106 | 0 | 0.00 | 0.00 | 0.00 | 2 | 99  |
| 28 | Vietnam                   | 39 | 0 | 39 | 270 | 0 | 270 | 0 | 0.00 | 0.00 | 0.00 | 0 | 133 |
| 29 | Wallis and Futuna Islands | 18 | 0 | 18 | 27  | 0 | 27  | 0 | 0.00 | 0.00 | 0.00 | 0 | 150 |
| 30 | Yemen                     | 37 | 0 | 37 | 249 | 0 | 249 | 0 | 0.00 | 0.00 | 0.00 | 3 | 84  |
| 31 | Zambia                    | 39 | 0 | 39 | 283 | 0 | 283 | 0 | 0.00 | 0.00 | 0.00 | 1 | 32  |
| 32 | Zimbabwe                  | 39 | 0 | 39 | 275 | 0 | 275 | 0 | 0.00 | 0.00 | 0.00 | 1 | 23  |

### Twitter network analysis statistics report

| Label          | indegree | outdegree | Degree | weighted indegree | weighted outdegree | Weighted Degree | Eccentricity | closenesscentrality | harmonicclosenesscentrality | betweennesscentrality | modularity_class | strongcompnum |
|----------------|----------|-----------|--------|-------------------|--------------------|-----------------|--------------|---------------------|-----------------------------|-----------------------|------------------|---------------|
| United States  | 0        | 8         | 8      | 0                 | 30                 | 30              | 3            | 0.38                | 0.44                        | 0.00                  | 0                | 67            |
| United Kingdom | 0        | 8         | 8      | 0                 | 29                 | 29              | 3            | 0.38                | 0.44                        | 0.00                  | 1                | 68            |
| BMGF           | 0        | 8         | 8      | 0                 | 35                 | 35              | 3            | 0.38                | 0.44                        | 0.00                  | 0                | 69            |
| WHO            | 3        | 9         | 12     | 17                | 29                 | 46              | 2            | 0.54                | 0.58                        | 23.50                 | 0                | 66            |
| World Bank     | 3        | 8         | 11     | 16                | 31                 | 47              | 2            | 0.54                | 0.58                        | 19.65                 | 1                | 65            |
| UNAIDS         | 3        | 9         | 12     | 8                 | 18                 | 26              | 2            | 0.54                | 0.58                        | 23.50                 | 0                | 64            |

|    |                   |   |    |    |    |    |    |   |      |      |       |   |    |
|----|-------------------|---|----|----|----|----|----|---|------|------|-------|---|----|
| 1  |                   |   |    |    |    |    |    |   |      |      |       |   |    |
| 2  |                   |   |    |    |    |    |    |   |      |      |       |   |    |
| 3  |                   |   |    |    |    |    |    |   |      |      |       |   |    |
| 4  | UNFPA             | 3 | 8  | 11 | 10 | 20 | 30 | 2 | 0.54 | 0.58 | 19.65 | 1 | 63 |
| 5  | UNICEF            | 3 | 9  | 12 | 13 | 28 | 41 | 2 | 0.54 | 0.58 | 23.50 | 1 | 62 |
| 6  | UNITAID           | 3 | 8  | 11 | 7  | 21 | 28 | 2 | 0.54 | 0.58 | 20.21 | 4 | 61 |
| 7  | GAVI              | 3 | 9  | 12 | 9  | 24 | 33 | 2 | 0.54 | 0.58 | 23.50 | 4 | 60 |
| 8  | GFATM             | 3 | 9  | 12 | 14 | 30 | 44 | 2 | 0.54 | 0.58 | 23.50 | 3 | 59 |
| 9  | Oxfam             | 8 | 10 | 18 | 28 | 10 | 38 | 1 | 1.00 | 1.00 | 40.64 | 1 | 58 |
| 10 | CDC               | 8 | 10 | 18 | 19 | 10 | 29 | 1 | 1.00 | 1.00 | 72.46 | 2 | 56 |
| 11 | EU CDC            | 6 | 10 | 16 | 13 | 10 | 23 | 1 | 1.00 | 1.00 | 62.06 | 3 | 51 |
| 12 | NIH               | 8 | 10 | 18 | 13 | 10 | 23 | 1 | 1.00 | 1.00 | 87.07 | 4 | 43 |
| 13 | FAO               | 7 | 9  | 16 | 13 | 9  | 22 | 1 | 1.00 | 1.00 | 67.06 | 1 | 35 |
| 14 | UNDP              | 8 | 10 | 18 | 33 | 10 | 43 | 1 | 1.00 | 1.00 | 41.00 | 1 | 28 |
| 15 | MSF               | 8 | 10 | 18 | 32 | 10 | 42 | 1 | 1.00 | 1.00 | 56.78 | 3 | 23 |
| 16 | PATH              | 8 | 10 | 18 | 30 | 10 | 40 | 1 | 1.00 | 1.00 | 59.94 | 4 | 17 |
| 17 | Save the Children | 8 | 9  | 17 | 20 | 9  | 29 | 1 | 1.00 | 1.00 | 46.99 | 1 | 9  |
| 18 | Access            | 1 | 0  | 1  | 1  | 0  | 1  | 0 | 0.00 | 0.00 | 0.00  | 4 | 16 |
| 19 | Africa            | 7 | 0  | 7  | 7  | 0  | 7  | 0 | 0.00 | 0.00 | 0.00  | 1 | 8  |
| 20 | Agriculture       | 1 | 0  | 1  | 1  | 0  | 1  | 0 | 0.00 | 0.00 | 0.00  | 1 | 34 |
| 21 | Biodiversity      | 1 | 0  | 1  | 1  | 0  | 1  | 0 | 0.00 | 0.00 | 0.00  | 1 | 33 |
| 22 | Breastfeeding     | 1 | 0  | 1  | 1  | 0  | 1  | 0 | 0.00 | 0.00 | 0.00  | 4 | 15 |
| 23 | Cancer            | 2 | 0  | 2  | 2  | 0  | 2  | 0 | 0.00 | 0.00 | 0.00  | 4 | 14 |
| 24 | Child Marriage    | 0 | 0  | 0  | 0  | 0  | 0  | 0 | 0.00 | 0.00 | 0.00  | 5 | 70 |
| 25 | Children          | 5 | 0  | 5  | 5  | 0  | 5  | 0 | 0.00 | 0.00 | 0.00  | 1 | 7  |
| 26 | Cholera           | 1 | 0  | 1  | 1  | 0  | 1  | 0 | 0.00 | 0.00 | 0.00  | 3 | 22 |
| 27 | Climate Change    | 3 | 0  | 3  | 3  | 0  | 3  | 0 | 0.00 | 0.00 | 0.00  | 1 | 27 |
| 28 | Development       | 0 | 0  | 0  | 0  | 0  | 0  | 0 | 0.00 | 0.00 | 0.00  | 6 | 71 |
| 29 | Diarrhea          | 1 | 0  | 1  | 1  | 0  | 1  | 0 | 0.00 | 0.00 | 0.00  | 2 | 55 |
| 30 | Discrimination    | 0 | 0  | 0  | 0  | 0  | 0  | 0 | 0.00 | 0.00 | 0.00  | 7 | 72 |
| 31 | Donations         | 1 | 0  | 1  | 1  | 0  | 1  | 0 | 0.00 | 0.00 | 0.00  | 1 | 6  |
| 32 | E. Coli           | 1 | 0  | 1  | 1  | 0  | 1  | 0 | 0.00 | 0.00 | 0.00  | 2 | 54 |
| 33 | Ebola             | 4 | 0  | 4  | 4  | 0  | 4  | 0 | 0.00 | 0.00 | 0.00  | 3 | 13 |
| 34 | Education         | 2 | 0  | 2  | 2  | 0  | 2  | 0 | 0.00 | 0.00 | 0.00  | 1 | 5  |
| 35 | FGM               | 1 | 0  | 1  | 1  | 0  | 1  | 0 | 0.00 | 0.00 | 0.00  | 1 | 26 |
| 36 | Families          | 1 | 0  | 1  | 1  | 0  | 1  | 0 | 0.00 | 0.00 | 0.00  | 1 | 32 |
| 37 | Family Planning   | 0 | 0  | 0  | 0  | 0  | 0  | 0 | 0.00 | 0.00 | 0.00  | 8 | 73 |
| 38 | Farmers           | 1 | 0  | 1  | 1  | 0  | 1  | 0 | 0.00 | 0.00 | 0.00  | 1 | 31 |
| 39 | Fisheries         | 1 | 0  | 1  | 1  | 0  | 1  | 0 | 0.00 | 0.00 | 0.00  | 1 | 30 |
| 40 | Food Security     | 4 | 0  | 4  | 4  | 0  | 4  | 0 | 0.00 | 0.00 | 0.00  | 1 | 4  |
| 41 | Forests           | 1 | 0  | 1  | 1  | 0  | 1  | 0 | 0.00 | 0.00 | 0.00  | 1 | 29 |
| 42 | Funding           | 1 | 0  | 1  | 1  | 0  | 1  | 0 | 0.00 | 0.00 | 0.00  | 4 | 42 |
| 43 | HIV/AIDS          | 4 | 0  | 4  | 4  | 0  | 4  | 0 | 0.00 | 0.00 | 0.00  | 1 | 21 |
| 44 | Heart Disease     | 1 | 0  | 1  | 1  | 0  | 1  | 0 | 0.00 | 0.00 | 0.00  | 4 | 41 |
| 45 | Hepatitis         | 1 | 0  | 1  | 1  | 0  | 1  | 0 | 0.00 | 0.00 | 0.00  | 3 | 50 |
| 46 | Human Rights      | 0 | 0  | 0  | 0  | 0  | 0  | 0 | 0.00 | 0.00 | 0.00  | 9 | 74 |
| 47 |                   |   |    |    |    |    |    |   |      |      |       |   |    |
| 48 |                   |   |    |    |    |    |    |   |      |      |       |   |    |
| 49 |                   |   |    |    |    |    |    |   |      |      |       |   |    |
| 50 |                   |   |    |    |    |    |    |   |      |      |       |   |    |
| 51 |                   |   |    |    |    |    |    |   |      |      |       |   |    |
| 52 |                   |   |    |    |    |    |    |   |      |      |       |   |    |
| 53 |                   |   |    |    |    |    |    |   |      |      |       |   |    |
| 54 |                   |   |    |    |    |    |    |   |      |      |       |   |    |
| 55 |                   |   |    |    |    |    |    |   |      |      |       |   |    |
| 56 |                   |   |    |    |    |    |    |   |      |      |       |   |    |
| 57 |                   |   |    |    |    |    |    |   |      |      |       |   |    |
| 58 |                   |   |    |    |    |    |    |   |      |      |       |   |    |
| 59 |                   |   |    |    |    |    |    |   |      |      |       |   |    |
| 60 |                   |   |    |    |    |    |    |   |      |      |       |   |    |

|    |               |   |   |   |   |   |   |   |      |      |      |       |
|----|---------------|---|---|---|---|---|---|---|------|------|------|-------|
| 1  |               |   |   |   |   |   |   |   |      |      |      |       |
| 2  |               |   |   |   |   |   |   |   |      |      |      |       |
| 3  | Humanitarian  |   |   |   |   |   |   |   |      |      |      |       |
| 4  | Aid           | 3 | 0 | 3 | 3 | 0 | 3 | 0 | 0.00 | 0.00 | 0.00 | 3 3   |
| 5  | Influenza     | 2 | 0 | 2 | 2 | 0 | 2 | 0 | 0.00 | 0.00 | 0.00 | 2 49  |
| 6  | Innovation    | 1 | 0 | 1 | 1 | 0 | 1 | 0 | 0.00 | 0.00 | 0.00 | 4 12  |
| 7  | Malaria       | 3 | 0 | 3 | 3 | 0 | 3 | 0 | 0.00 | 0.00 | 0.00 | 1 11  |
| 8  | Measles       | 2 | 0 | 2 | 2 | 0 | 2 | 0 | 0.00 | 0.00 | 0.00 | 3 48  |
| 9  | Mothers       | 0 | 0 | 0 | 0 | 0 | 0 | 0 | 0.00 | 0.00 | 0.00 | 10 75 |
| 10 | News          | 1 | 0 | 1 | 1 | 0 | 1 | 0 | 0.00 | 0.00 | 0.00 | 4 40  |
| 11 | Nutrition     | 0 | 0 | 0 | 0 | 0 | 0 | 0 | 0.00 | 0.00 | 0.00 | 11 76 |
| 12 | Online        | 0 | 0 | 0 | 0 | 0 | 0 | 0 | 0.00 | 0.00 | 0.00 | 12 77 |
| 13 | Outbreaks     | 1 | 0 | 1 | 1 | 0 | 1 | 0 | 0.00 | 0.00 | 0.00 | 3 47  |
| 14 | Pneumonia     | 1 | 0 | 1 | 1 | 0 | 1 | 0 | 0.00 | 0.00 | 0.00 | 1 57  |
| 15 | Pneumonia     | 2 | 0 | 2 | 2 | 0 | 2 | 0 | 0.00 | 0.00 | 0.00 | 1 2   |
| 16 | Polio         | 0 | 0 | 0 | 0 | 0 | 0 | 0 | 0.00 | 0.00 | 0.00 | 13 78 |
| 17 | Poverty       | 0 | 0 | 0 | 0 | 0 | 0 | 0 | 0.00 | 0.00 | 0.00 | 14 79 |
| 18 | Prevention    | 1 | 0 | 1 | 1 | 0 | 1 | 0 | 0.00 | 0.00 | 0.00 | 2 53  |
| 19 | Rare Disease  | 1 | 0 | 1 | 1 | 0 | 1 | 0 | 0.00 | 0.00 | 0.00 | 4 39  |
| 20 | Refugees      | 3 | 0 | 3 | 3 | 0 | 3 | 0 | 0.00 | 0.00 | 0.00 | 3 1   |
| 21 | Report        | 1 | 0 | 1 | 1 | 0 | 1 | 0 | 0.00 | 0.00 | 0.00 | 3 46  |
| 22 | Research      | 1 | 0 | 1 | 1 | 0 | 1 | 0 | 0.00 | 0.00 | 0.00 | 4 38  |
| 23 | Sanitation    | 0 | 0 | 0 | 0 | 0 | 0 | 0 | 0.00 | 0.00 | 0.00 | 15 80 |
| 24 | Schools       | 1 | 0 | 1 | 1 | 0 | 1 | 0 | 0.00 | 0.00 | 0.00 | 1 0   |
| 25 | South America | 0 | 0 | 0 | 0 | 0 | 0 | 0 | 0.00 | 0.00 | 0.00 | 16 81 |
| 26 | Stress        | 1 | 0 | 1 | 1 | 0 | 1 | 0 | 0.00 | 0.00 | 0.00 | 4 37  |
| 27 | Surveillance  | 1 | 0 | 1 | 1 | 0 | 1 | 0 | 0.00 | 0.00 | 0.00 | 3 45  |
| 28 | Testing       | 0 | 0 | 0 | 0 | 0 | 0 | 0 | 0.00 | 0.00 | 0.00 | 17 82 |
| 29 | Treatment     | 1 | 0 | 1 | 1 | 0 | 1 | 0 | 0.00 | 0.00 | 0.00 | 3 20  |
| 30 | Tuberculosis  | 2 | 0 | 2 | 2 | 0 | 2 | 0 | 0.00 | 0.00 | 0.00 | 3 19  |
| 31 | Vaccines      | 2 | 0 | 2 | 2 | 0 | 2 | 0 | 0.00 | 0.00 | 0.00 | 2 10  |
| 32 | Veterans      | 1 | 0 | 1 | 1 | 0 | 1 | 0 | 0.00 | 0.00 | 0.00 | 4 36  |
| 33 | Violence      | 1 | 0 | 1 | 1 | 0 | 1 | 0 | 0.00 | 0.00 | 0.00 | 3 18  |
| 34 | Water         | 3 | 0 | 3 | 3 | 0 | 3 | 0 | 0.00 | 0.00 | 0.00 | 2 25  |
| 35 | West Nile     | 1 | 0 | 1 | 1 | 0 | 1 | 0 | 0.00 | 0.00 | 0.00 | 3 44  |
| 36 | Women         | 3 | 0 | 3 | 3 | 0 | 3 | 0 | 0.00 | 0.00 | 0.00 | 2 24  |
| 37 | Zika          | 1 | 0 | 1 | 1 | 0 | 1 | 0 | 0.00 | 0.00 | 0.00 | 2 52  |
| 38 |               |   |   |   |   |   |   |   |      |      |      |       |
| 39 |               |   |   |   |   |   |   |   |      |      |      |       |
| 40 |               |   |   |   |   |   |   |   |      |      |      |       |
| 41 |               |   |   |   |   |   |   |   |      |      |      |       |
| 42 |               |   |   |   |   |   |   |   |      |      |      |       |
| 43 |               |   |   |   |   |   |   |   |      |      |      |       |
| 44 |               |   |   |   |   |   |   |   |      |      |      |       |
| 45 |               |   |   |   |   |   |   |   |      |      |      |       |
| 46 |               |   |   |   |   |   |   |   |      |      |      |       |
| 47 |               |   |   |   |   |   |   |   |      |      |      |       |
| 48 |               |   |   |   |   |   |   |   |      |      |      |       |
| 49 |               |   |   |   |   |   |   |   |      |      |      |       |
| 50 |               |   |   |   |   |   |   |   |      |      |      |       |
| 51 |               |   |   |   |   |   |   |   |      |      |      |       |
| 52 |               |   |   |   |   |   |   |   |      |      |      |       |
| 53 |               |   |   |   |   |   |   |   |      |      |      |       |
| 54 |               |   |   |   |   |   |   |   |      |      |      |       |
| 55 |               |   |   |   |   |   |   |   |      |      |      |       |
| 56 |               |   |   |   |   |   |   |   |      |      |      |       |
| 57 |               |   |   |   |   |   |   |   |      |      |      |       |
| 58 |               |   |   |   |   |   |   |   |      |      |      |       |
| 59 |               |   |   |   |   |   |   |   |      |      |      |       |
| 60 |               |   |   |   |   |   |   |   |      |      |      |       |
