# Supplementary material for: Examining power dynamics in global health governance using topic modeling and network analysis of Twitter data
Source: PubMed Central journal article supplement — BMJ Open. 2022 Jun 6;12(6):e054470. doi: 10.1136/bmjopen-2021-054470 (PMC9171232; doi:10.1136/bmjopen-2021-054470), 2022-06-06
Supplement: bmjopen-2021-054470supp002.pdf [file bmjopen-2021-054470supp002.pdf]

**Supplementary Table 2. Breakdown of Collected Tweets by Actor and Month.** Total tweets and average tweets per month for each of the 20 global health actors.

| Global Health Actor                                        | Total Tweets  | Average Tweets per Month |
|------------------------------------------------------------|---------------|--------------------------|
| World Health Organization                                  | 10,827        | 722                      |
| Oxfam International                                        | 5,694         | 380                      |
| Doctors Without Borders (MSF)                              | 5,553         | 370                      |
| UN Children's Fund (UNICEF)                                | 5,395         | 360                      |
| World Bank                                                 | 5,365         | 358                      |
| UN Development Programme (UNDP)                            | 4,912         | 327                      |
| UN Population Fund (UNFPA)                                 | 3,908         | 261                      |
| UK Department of International Development                 | 3,823         | 255                      |
| Centers for Disease Control and Prevention (CDC)           | 3,701         | 247                      |
| United States Agency for International Development (USAID) | 3,604         | 240                      |
| Food and Agriculture Organization (FAO)                    | 3,263         | 218                      |
| Save the Children                                          | 3,121         | 208                      |
| Gavi, the Vaccine Alliance                                 | 2,739         | 183                      |
| National Institutes of Health (NIH)                        | 2,664         | 178                      |
| Joint UN Programme on HIV/AIDS (UNAIDS)                    | 2,214         | 148                      |
| PATH                                                       | 1,954         | 130                      |
| Global Fund                                                | 1,727         | 115                      |
| European Centre for Disease Prevention and Control (ECDC)  | 1,311         | 87                       |
| Gates Foundation                                           | 1,249         | 83                       |
| Unitaid                                                    | 1,217         | 81                       |
| <b>Total</b>                                               | <b>74,241</b> | <b>4,949</b>             |
