# Supplementary material for: Examining power dynamics in global health governance using topic modeling and network analysis of Twitter data
Source: PubMed Central journal article supplement — BMJ Open. 2022 Jun 6;12(6):e054470. doi: 10.1136/bmjopen-2021-054470 (PMC9171232; doi:10.1136/bmjopen-2021-054470), 2022-06-06
Supplement: bmjopen-2021-054470supp003.pdf [file bmjopen-2021-054470supp003.pdf]

**Supplementary Table 3. Breakdown of Collected Tweets by Year and Month** Tweets per month and per year for all the tweets collected.

|              | Tweets per Month | Tweets per Year |
|--------------|------------------|-----------------|
| 2016         |                  | 5,973           |
| November     | 5,973            |                 |
| 2017         |                  | 21,193          |
| February     | 4,474            |                 |
| May          | 5,582            |                 |
| August       | 5,103            |                 |
| November     | 6,034            |                 |
| 2018         |                  | 18,562          |
| February     | 4,145            |                 |
| May          | 4,965            |                 |
| August       | 4,205            |                 |
| November     | 5,247            |                 |
| 2019         |                  | 17,884          |
| February     | 4,500            |                 |
| May          | 4,886            |                 |
| August       | 3,987            |                 |
| November     | 4,511            |                 |
| 2020         |                  | 10,629          |
| February     | 4,446            |                 |
| May          | 6,183            |                 |
| <b>Total</b> | <b>74,241</b>    | <b>74,241</b>   |
