# Supplementary material for: Examining power dynamics in global health governance using topic modeling and network analysis of Twitter data
Source: PubMed Central journal article supplement — BMJ Open. 2022 Jun 6;12(6):e054470. doi: 10.1136/bmjopen-2021-054470 (PMC9171232; doi:10.1136/bmjopen-2021-054470), 2022-06-06
Supplement: bmjopen-2021-054470supp004.pdf [file bmjopen-2021-054470supp004.pdf]

**Supplementary Table 4. Priority Similarity Matrix** Scores are generated by comparing the list of 10 health priorities of actor A with that of actor B and the number of matching priorities is counted. Topic similarity scores range from 0-10.

|                   | USA | UK | BMGF | WHO | World Bank | UNAIDS | UNFPA | UNICEF | UNITAID | GAVI | Oxfam | Global Fund | CDC | EU CDC | NIH | FAO | UNDP | MSF | PATH | Save the Children |
|-------------------|-----|----|------|-----|------------|--------|-------|--------|---------|------|-------|-------------|-----|--------|-----|-----|------|-----|------|-------------------|
| USA               |     | 7  | 6    | 5   | 6          | 3      | 4     | 4      | 2       | 2    | 5     | 4           | 3   | 1      | 2   | 3   | 7    | 4   | 2    | 6                 |
| UK                | 7   |    | 4    | 4   | 6          | 2      | 3     | 5      | 2       | 3    | 5     | 4           | 2   | 2      | 2   | 4   | 6    | 5   | 3    | 6                 |
| BMGF              | 6   | 4  |      | 8   | 4          | 3      | 3     | 4      | 3       | 3    | 3     | 6           | 2   | 1      | 2   | 1   | 6    | 3   | 4    | 3                 |
| WHO               | 5   | 4  | 8    |     | 3          | 3      | 3     | 4      | 3       | 5    | 4     | 7           | 3   | 3      | 2   | 1   | 5    | 4   | 5    | 2                 |
| World Bank        | 6   | 6  | 4    | 3   |            | 2      | 4     | 4      | 1       | 3    | 6     | 3           | 3   | 0      | 1   | 5   | 6    | 3   | 2    | 5                 |
| UNAIDS            | 3   | 2  | 3    | 3   | 2          |        | 3     | 2      | 4       | 1    | 2     | 3           | 2   | 1      | 2   | 1   | 3    | 3   | 3    | 1                 |
| UNFPA             | 4   | 3  | 3    | 3   | 4          | 3      |       | 4      | 1       | 2    | 3     | 3           | 2   | 0      | 1   | 1   | 4    | 4   | 2    | 3                 |
| UNICEF            | 4   | 5  | 4    | 4   | 4          | 2      | 4     |        | 1       | 3    | 4     | 3           | 2   | 1      | 1   | 3   | 5    | 4   | 4    | 4                 |
| UNITAID           | 2   | 2  | 3    | 3   | 1          | 4      | 1     | 1      |         | 3    | 1     | 4           | 2   | 3      | 2   | 0   | 3    | 4   | 5    | 1                 |
| GAVI              | 2   | 3  | 3    | 5   | 3          | 1      | 2     | 3      | 3       |      | 3     | 6           | 3   | 2      | 2   | 1   | 2    | 4   | 5    | 2                 |
| Oxfam             | 5   | 5  | 3    | 4   | 6          | 2      | 3     | 4      | 1       | 3    |       | 5           | 2   | 1      | 1   | 4   | 6    | 4   | 3    | 5                 |
| Global Fund       | 4   | 4  | 6    | 7   | 3          | 3      | 3     | 3      | 4       | 6    | 5     |             | 2   | 3      | 2   | 1   | 5    | 6   | 4    | 2                 |
| CDC               | 3   | 2  | 2    | 3   | 3          | 2      | 2     | 2      | 2       | 3    | 2     | 2           |     | 2      | 0   | 1   | 3    | 1   | 2    | 2                 |
| EU CDC            | 1   | 2  | 1    | 3   | 0          | 1      | 0     | 1      | 3       | 2    | 1     | 3           | 2   |        | 1   | 0   | 1    | 3   | 1    | 0                 |
| NIH               | 2   | 2  | 2    | 2   | 1          | 2      | 1     | 1      | 2       | 2    | 1     | 2           | 0   | 1      |     | 1   | 2    | 2   | 2    | 1                 |
| FAO               | 3   | 4  | 1    | 1   | 5          | 1      | 1     | 3      | 0       | 1    | 4     | 1           | 1   | 0      | 1   |     | 4    | 1   | 1    | 3                 |
| UNDP              | 7   | 6  | 6    | 5   | 6          | 3      | 4     | 5      | 3       | 2    | 6     | 5           | 3   | 1      | 2   | 4   |      | 3   | 3    | 5                 |
| MSF               | 4   | 5  | 3    | 4   | 3          | 3      | 4     | 4      | 4       | 4    | 4     | 6           | 1   | 3      | 2   | 1   | 3    |     | 3    | 4                 |
| PATH              | 2   | 3  | 4    | 5   | 2          | 3      | 2     | 4      | 5       | 5    | 3     | 4           | 2   | 1      | 2   | 1   | 3    | 3   |      | 3                 |
| Save the Children | 6   | 6  | 3    | 2   | 5          | 1      | 3     | 4      | 1       | 2    | 5     | 2           | 2   | 0      | 1   | 3   | 5    | 4   | 3    |                   |
