# Supplementary material for: Examining power dynamics in global health governance using topic modeling and network analysis of Twitter data
Source: PubMed Central journal article supplement — BMJ Open. 2022 Jun 6;12(6):e054470. doi: 10.1136/bmjopen-2021-054470 (PMC9171232; doi:10.1136/bmjopen-2021-054470), 2022-06-06
Supplement: bmjopen-2021-054470supp005.pdf [file bmjopen-2021-054470supp005.pdf]

**Supplementary Table 5. Types of Power.** A summary of the four types of power as presented by Barnett and Duvall (2005) with examples in global health.

| Power Type          | Relational specificity | Power works through...           | Definition according to Barnett & Duvall (2005)                                                                          | Global Health Example                                                                                                                                            |
|---------------------|------------------------|----------------------------------|--------------------------------------------------------------------------------------------------------------------------|------------------------------------------------------------------------------------------------------------------------------------------------------------------|
| Compulsory Power    | Direct                 | Interactions of specific actors  | "Direct control of one actor over the conditions of existence or the actions of another." (p. 48)                        | Donor countries dictate the conditions in low and middle-income countries (LMICs) through dictating requirements in development aid.                             |
| Institutional Power | Diffuse                | Interactions of specific actors  | "Control actors exercise indirectly over others through diffuse relations of interactions." (p. 43)                      | High-income countries control funding allocations for LMICs through institutional power via their contributions to the WHO and other multilateral organizations. |
| Structural Power    | Direct                 | Social relations of constitution | "Constitution of subjects' capacities in direct structural relation to one another." (p. 43)                             | The structural and historical disempowerment of indigenous populations have resulted in their disproportionate outcomes in health.                               |
| Productive Power    | Diffuse                | Social relations of constitution | "Power [that] works through diffuse constitutive relations to produce the situated social capacities of actors." (p. 48) | High-income countries direct what research institutions prioritize and study, and ultimately determine what health issues are addressed.                         |
