# Supplementary material for: Examining power dynamics in global health governance using topic modeling and network analysis of Twitter data
Source: PubMed Central journal article supplement — BMJ Open. 2022 Jun 6;12(6):e054470. doi: 10.1136/bmjopen-2021-054470 (PMC9171232; doi:10.1136/bmjopen-2021-054470), 2022-06-06
Supplement: bmjopen-2021-054470supp006.pdf [file bmjopen-2021-054470supp006.pdf]

## SUPPLEMENTARY MATERIALS

### Materials and Methods

#### *Rationale for choosing the 20 global health actors*

1. Hoffman & Cole (2018), Frenk & Moon (2013), and Szlezak et al. (2010) were the basis for the 20 global health actors in this study.[4, 15, 16]
  - a. Hoffman & Cole (2018) used the related search function in Google in order to systematically map global health actors – 20 global health actors were identified as most important based on their methodology and was validated by 9 identified global health experts.
  - b. Frenk & Moon (2013) identifies 9 primary types of actors in global health with 24 examples in their study on pluralism and other challenges in global health.
  - c. Szlezak et al. (2010) describes their 8 identified types of actors in global health as a partnership in their article that argues for the norms and roles of each actor in the transition of global health.
2. The identified global health actors across the 3 studies were compared, and the 20 actors that were identified most important by all 3 studies were chosen.

#### *Collection of tweets*

1. Twitter is one of the social media platforms where global health actors actively and consistently share their work, research, and news to the general global public.
2. Using the [Twitter Application Programming Interface \(API\)](#), tweets from of the 20 global health actors were collected from November 2016 to May 2020 in three month intervals.
  - a. All the tweets of each of the 20 global health actors were collected for the following 15 months:
    - i. 2016: November
    - ii. 2017: February, May, August, November
    - iii. 2018: February, May, August, November
    - iv. 2019: February, May, August, November
    - v. 2020: February, May
  - b. November 2019 is the identified beginning of the COVID-19 outbreak.
  - c. This scope allows an analysis of tweets of global health actors 3 years leading up to the COVID-19 outbreak and 6-months into the pandemic.
3. Three month intervals were chosen with the assumption that a variance in the issues, topics, and themes that global health actors tweet can be seen in three month intervals while allowing for efficient usage of the request limit from the Twitter API.

#### *Topic modelling*

1. Topic Modeling was conducted to identify the 10 most tweeted global health issues/topics by each actor in each of the 15 months in the study.

2. The 10 most tweeted global health issues/topics were used to describe the set of issues/problems a specific global health actor prioritizes in a given month.
3. [Latent Dirichlet Allocation \(LDA\)](#) was used in topic modeling.
4. Topic modeling answers the questions:
  - a. “What are the most prioritized issues among the identified global health actors from 2016 to 2020?”
  - b. “When did global health actors have pandemic preparedness as a priority in the three years leading up to the COVID-19 pandemic?”
  - c. “What are the trends in prioritization of global health issues between and among different types of global health actors?”

#### *FAQs about how LDA was used in this study*

- What did the authors do with tweets that mentioned both “breastfeeding” and “mothers”? Do the authors believe that the revealed priorities of an organization that references both breastfeeding and mothers are substantively different than those of an organization that just references breastfeeding, and so on?
  - For context, LDA topic modeling is a form of “unsupervised machine learning” where the data used is “unlabeled.” This means that when we ran the algorithm, we did not define what statements will be categorized as “breastfeeding” and what will be categorized as “mothers.” We also did not define what words would fall under any other topics that were generated by the model. The only input from us is was how many topics we want the LDA algorithm to categorize the corpus of text. In our analysis, we generated 10 topics for each of the 20 actors. The LDA algorithm generates topics based on a generative probabilistic model that assumes each topic is a mixture over an underlying set of words, and each corpus of text is a mixture of sets of topic probabilities. In a nutshell, the algorithm analyzes all the words in all the tweets of a specific actor. It then generates probabilities of each unique word appearing with other words in a certain tweet or sentence. Topics are then generated by the model based on these sets of probabilities.
- Some topics are quite general (e.g., “Poverty”, “Treatment”, “News”), while others are more specific (“Fisheries”, “Hepatitis”, “Veterans”). In cases where one topic could be subsumed by another (e.g., “Schools” could be subsumed by “Education”), how did the authors disaggregate these?
  - We did not have any input in categorizing any of the topics generated. The topics generated are based on the words and language used by each respective actor in their tweets. The algorithm uses the words/language used by the actor in their tweets to generate topics. We did not make any other edits to the topics after they were generated.

#### *Code for collecting tweets*

```
# CREDENTIALS
import yaml

config = dict(
    search_tweets_api = dict(
        account_type = 'premium',
        endpoint = 'https://api.twitter.com/1.1/tweets/search/fullarchive/datacollection.json',
```

```

        consumer_key = 'xxxxxxxxxxxxxxxxxxxxxxxxxxxxxxxx',
        consumer_secret = 'xxxxxxxxxxxxxxxxxxxxxxxxxxxxxxxx'
    )
)

with open('twitter_keys_fullarchive.yaml', 'w') as config_file:
    yaml.dump(config, config_file, default_flow_style=False)

# LOAD CREDENTIALS
from searchtweets import load_credentials

premium_search_args = load_credentials("twitter_keys_fullarchive.yaml",
                                       yaml_key="search_tweets_api",
                                       env_overwrite=False)

print(premium_search_args)

# QUERY RULE SET UP
from searchtweets import gen_rule_payload

rule = gen_rule_payload("from:username",
                       results_per_call=500,
                       from_date="2020-02-01",
                       to_date="2020-03-01"
                       )

# WRITE TO JSONL config_file
import json

with open('tweets_feb_2020.jsonl', 'a', encoding='utf-8') as f:
    n = 0
    for tweet in rs.stream():
        n += 1
        if n % 10 == 0:
            print('{0}: {1}'.format(str(n), tweet['created_at']))
            json.dump(tweet, f)
            f.write('\n')
print('done!')

# REPEAT FOR OTHER USERS AND MONTHS

```

### *Code for topic modelling*

```

# Importing modules

import pandas as pd

# Read data into tweets_df
tweets_df = pd.read_csv('tweets_nov2016-may2020.csv')

# Print head
tweets_df.head()

# Remove the columns
tweets_df = tweets_df[["username", "user_id", "created_at", "tweet"]]

# Print out the first rows of tweets_df
tweets_df.head()

# Create dataframe for each month in analysis
tweets_feb = tweets.loc[tweets.created_at.str.contains("Feb")]
tweets_feb_17 = tweets_feb.loc[tweets_feb.created_at.str.contains("2017")]
tweets_feb_18 = tweets_feb.loc[tweets_feb.created_at.str.contains("2018")]
tweets_feb_19 = tweets_feb.loc[tweets_feb.created_at.str.contains("2019")]
tweets_feb_20 = tweets_feb.loc[tweets_feb.created_at.str.contains("2020")]

tweets_may = tweets.loc[tweets.created_at.str.contains("May")]
tweets_may_17 = tweets_may.loc[tweets_may.created_at.str.contains("2017")]
tweets_may_18 = tweets_may.loc[tweets_may.created_at.str.contains("2018")]
tweets_may_19 = tweets_may.loc[tweets_may.created_at.str.contains("2019")]
tweets_may_20 = tweets_may.loc[tweets_may.created_at.str.contains("2020")]

tweets_aug = tweets.loc[tweets.created_at.str.contains("Aug")]
tweets_aug_17 = tweets_aug.loc[tweets_aug.created_at.str.contains("2017")]
tweets_aug_18 = tweets_aug.loc[tweets_aug.created_at.str.contains("2018")]
tweets_aug_19 = tweets_aug.loc[tweets_aug.created_at.str.contains("2019")]

```

```

tweets_nov = tweets.loc[tweets.created_at.str.contains("Nov")]
tweets_nov_16 = tweets_nov.loc[tweets_nov.created_at.str.contains("2016")]
tweets_nov_17 = tweets_nov.loc[tweets_nov.created_at.str.contains("2017")]
tweets_nov_18 = tweets_nov.loc[tweets_nov.created_at.str.contains("2018")]
tweets_nov_19 = tweets_nov.loc[tweets_nov.created_at.str.contains("2019")]

# Helper function
def plot_10_most_common_words(count_data, count_vectorizer):
    import matplotlib.pyplot as plt
    words = count_vectorizer.get_feature_names()
    total_counts = np.zeros(len(words))
    for t in count_data:
        total_counts+=t.toarray()[0]

    count_dict = (zip(words, total_counts))
    count_dict = sorted(count_dict, key=lambda x:x[1], reverse=True)[1:23]
    words = [w[0] for w in count_dict]
    counts = [w[1] for w in count_dict]
    x_pos = np.arange(len(words))

    plt.figure(2, figsize=(15, 2))
    plt.subplot(title=f'10 Most Common Words')
    sns.set_context("notebook", font_scale=1.25, rc={"lines.linewidth": 2.5})
    sns.barplot(x_pos, counts, palette='husl')
    plt.xticks(x_pos, words, rotation=90)
    plt.xlabel('words')
    plt.ylabel('counts')
    plt.show()

# Import Libraries
from sklearn.feature_extraction.text import CountVectorizer
import numpy as np

import matplotlib.pyplot as plt
import seaborn as sns

import re
import string

# Identify top 10 keywords, issues, topics of each actor for a given month
tweets = tweets_nov_16[tweets_nov_16["username"] == username]
tweets = tweets_df[tweets_df['username'].isin(username)]
printable = set(string.printable)
tweets['paper_text_processed'] = tweets['tweet'].map(lambda x: re.sub('[,\.\!?\]', '', x))
tweets['paper_text_processed'] = tweets['tweet'].map(lambda x: x.encode('ascii','ignore'))
exclusionList = ['amp','https','RT','people','know','living','new','2018','latest','use','week',
                'ECDC_EU','thank','Thank','DYK','USAID','today','world','million','country',
                'foreignoffice','UK','billgates','melindagates','2019','des','33','DFID',
                '000','day','like','year','old','live','UNITAID','PATHtweets','PATH','para',
                'WorldBank','LIVE','WHOAFRO','WHOWPRO','WHOSEARO','WHOEMRO','GlobalFund','WHO_Europe','la'
                ]
exclusions = '|'.join(exclusionList)
tweets['paper_text_processed'] = tweets['tweet'].map(lambda x: re.sub(exclusions, '', x))
tweets['paper_text_processed'] = tweets['paper_text_processed'].map(lambda x: x.lower())
tweets['paper_text_processed'].head()
sns.set_style('whitegrid')
%matplotlib inline
count_vectorizer = CountVectorizer(stop_words='english')
count_data = count_vectorizer.fit_transform(tweets['paper_text_processed'])
import warnings
warnings.simplefilter("ignore")
plot_10_most_common_words(count_data, count_vectorizer)

# LDA Topic Modeling
import warnings
warnings.simplefilter("ignore", DeprecationWarning)
# Load the LDA model from sk-learn
from sklearn.decomposition import LatentDirichletAllocation as LDA

# Helper function
def print_topics(model, count_vectorizer, n_top_words):
    words = count_vectorizer.get_feature_names()
    for topic_idx, topic in enumerate(model.components_):
        print("\nTopic #%d:" % topic_idx)
        print(" ".join([words[i]
                        for i in topic.argsort()[::-n_top_words - 1:-1]]))

# Tweak the two parameters below
number_topics = 5

```

```

number_words = 10
# Create and fit the LDA model
lda = LDA(n_components=number_topics, n_jobs=-1)
lda.fit(count_data)
# Print the topics found by the LDA model
print("Topics found via LDA:")
print_topics(lda, count_vectorizer, number_words)

```

### *How network maps were analyzed*

- **What is network analysis?** Network analysis is an analytic method that has proved to be useful in understanding relational dynamics across actors in global and public health. (Lopreite et al. 2021 and Quisell et al. 2018).
- **Why use network analysis for the study?** Network analysis was conducted to observe the funding relationships between global health actors.
- **What tool was used?** Gephi 0.9.2 was used in constructing and analyzing the network map.
- **How was the network map designed?**
  - The network modelled in the study allows for a graphical visualization of the flows of global health funding in 2019.
  - The network map was designed such that each global health actor is represented by a node and lines or “edges” indicate a flow of funding in global health.
  - The Fruchterman-Reingold algorithm was used in modelling the network map.
    - The algorithm “calculates the optimal layout so that nodes with less strength and less connections are placed further apart, and those with more and/or stronger connections are placed closer to each other.”[18]
    - The thickness of edges represents the amount of funding transferred between actors.
    - The modelled network map can be found and will be discussed in the findings section.

### *DAH funding data network analysis summary statistics*

| Network Overview     |         |       |
|----------------------|---------|-------|
| Average Degree       | 25.403  | Run ⓘ |
| Avg. Weighted Degree | 254.124 | Run ⓘ |
| Network Diameter     | 4       | Run ⓘ |
| Graph Density        | 0.113   | Run ⓘ |
| HITS                 |         | Run ⓘ |
| Modularity           | 0.093   | Run ⓘ |
| PageRank             |         | Run ⓘ |
| Connected Components | 1       | Run ⓘ |

*Twitter data network analysis summary statistics*

| Network Overview     |       |     |   |
|----------------------|-------|-----|---|
| Average Degree       | 2.181 | Run | ? |
| Avg. Weighted Degree | 4.614 | Run | ? |
| Network Diameter     | 3     | Run | ? |
| Graph Density        | 0.027 | Run | ? |
| HITS                 |       | Run | ? |
| Modularity           | 0.172 | Run | ? |
| PageRank             |       | Run | ? |
| Connected Components | 14    | Run | ? |

*DAH funding data network analysis statistics report*

| Label                    | indegree | outdegree | Degree | weighted indegree | weighted outdegree | Weighted Degree | Eccentricity | closenesscentrality | harmonicclosenesscentrality | betweensscentrality | modularity_class | strongcompnum |
|--------------------------|----------|-----------|--------|-------------------|--------------------|-----------------|--------------|---------------------|-----------------------------|---------------------|------------------|---------------|
| African Development Bank | 25       | 57        | 82     | 1149              | 1149               | 2298            | 1            | 1.00                | 1.00                        | 54.18               | 1                | 57            |
| Asian Development Bank   | 26       | 48        | 74     | 723               | 723                | 1446            | 3            | 0.42                | 0.53                        | 52.20               | 0                | 160           |
| United Arab Emirates     | 1        | 79        | 80     | 79                | 79                 | 158             | 1            | 1.00                | 1.00                        | 7.28                | 2                | 161           |
| Australia                | 1        | 151       | 152    | 137               | 1021               | 1158            | 2            | 0.85                | 0.91                        | 0.00                | 2                | 175           |
| Austria                  | 1        | 128       | 129    | 112               | 1083               | 1195            | 2            | 0.76                | 0.85                        | 0.00                | 0                | 179           |
| Belgium                  | 1        | 140       | 141    | 123               | 1278               | 1401            | 2            | 0.80                | 0.87                        | 0.00                | 0                | 181           |
| Canada                   | 1        | 163       | 164    | 146               | 1564               | 1710            | 2            | 0.89                | 0.94                        | 0.00                | 2                | 183           |
| Switzerland              | 1        | 138       | 139    | 124               | 866                | 990             | 2            | 0.82                | 0.89                        | 0.00                | 2                | 184           |
| China                    | 39       | 12        | 51     | 251               | 380                | 631             | 2            | 0.52                | 0.53                        | 661.00              | 1                | 160           |
| Germany                  | 1        | 165       | 166    | 147               | 1476               | 1623            | 2            | 0.90                | 0.94                        | 0.00                | 0                | 185           |
| Denmark                  | 1        | 131       | 132    | 115               | 1229               | 1344            | 2            | 0.77                | 0.85                        | 0.00                | 0                | 186           |
| Spain                    | 1        | 152       | 153    | 134               | 1498               | 1632            | 2            | 0.84                | 0.91                        | 0.00                | 0                | 188           |
| Finland                  | 1        | 160       | 161    | 144               | 1210               | 1354            | 2            | 0.88                | 0.93                        | 0.00                | 0                | 189           |
| France                   | 1        | 172       | 173    | 154               | 1466               | 1620            | 2            | 0.92                | 0.96                        | 0.00                | 0                | 192           |
| United Kingdom           | 1        | 168       | 169    | 150               | 1552               | 1702            | 2            | 0.91                | 0.95                        | 0.00                | 0                | 193           |
| Greece                   | 1        | 148       | 149    | 133               | 1031               | 1164            | 2            | 0.83                | 0.90                        | 0.00                | 0                | 194           |
| Ireland                  | 1        | 120       | 121    | 104               | 1081               | 1185            | 2            | 0.74                | 0.82                        | 0.00                | 2                | 195           |
| Italy                    | 1        | 160       | 161    | 143               | 1433               | 1576            | 2            | 0.88                | 0.93                        | 0.00                | 0                | 196           |
| Japan                    | 1        | 169       | 170    | 155               | 1111               | 1266            | 2            | 0.94                | 0.97                        | 0.00                | 2                | 198           |
| Korea                    | 1        | 138       | 139    | 125               | 876                | 1001            | 2            | 0.82                | 0.89                        | 0.00                | 2                | 199           |
| Luxembourg               | 1        | 130       | 131    | 114               | 1124               | 1238            | 2            | 0.77                | 0.85                        | 0.00                | 2                | 200           |

|                                                 |    |     |     |      |      |      |   |      |      |        |   |     |
|-------------------------------------------------|----|-----|-----|------|------|------|---|------|------|--------|---|-----|
| Netherlands                                     | 1  | 158 | 159 | 142  | 1380 | 1522 | 2 | 0.87 | 0.93 | 0.00   | 0 | 201 |
| Norway                                          | 1  | 157 | 158 | 138  | 1221 | 1359 | 2 | 0.86 | 0.92 | 0.00   | 2 | 203 |
| New Zealand                                     | 1  | 129 | 130 | 118  | 633  | 751  | 2 | 0.78 | 0.86 | 0.00   | 3 | 204 |
| Portugal                                        | 1  | 73  | 74  | 57   | 885  | 942  | 3 | 0.62 | 0.69 | 0.00   | 0 | 205 |
| Sweden                                          | 1  | 155 | 156 | 139  | 1464 | 1603 | 2 | 0.86 | 0.92 | 0.00   | 0 | 206 |
| United States                                   | 1  | 165 | 166 | 150  | 1390 | 1540 | 2 | 0.92 | 0.96 | 0.00   | 2 | 207 |
| Bill & Melinda Gates Foundation                 | 1  | 162 | 163 | 146  | 1280 | 1426 | 2 | 0.89 | 0.94 | 0.00   | 1 | 208 |
| Coalition for Epidemic Preparedness Innovations | 10 | 1   | 11  | 10   | 10   | 20   | 1 | 1.00 | 1.00 | 0.23   | 1 | 163 |
| European Commission                             | 15 | 148 | 163 | 2184 | 2184 | 4368 | 3 | 0.83 | 0.92 | 53.93  | 0 | 178 |
| European Economic Area                          | 3  | 7   | 10  | 17   | 17   | 34   | 1 | 1.00 | 1.00 | 8.85   | 2 | 202 |
| Gavi                                            | 28 | 118 | 146 | 2024 | 2024 | 4048 | 3 | 0.65 | 0.81 | 110.05 | 1 | 160 |
| Global Fund                                     | 29 | 155 | 184 | 4119 | 4119 | 8238 | 3 | 0.91 | 0.96 | 336.01 | 2 | 160 |
| Inter-American Development Bank                 | 15 | 34  | 49  | 269  | 269  | 538  | 1 | 1.00 | 1.00 | 49.50  | 2 | 119 |
| International NGOs                              | 27 | 151 | 178 | 2323 | 2323 | 4646 | 3 | 0.86 | 0.94 | 198.03 | 2 | 171 |
| US NGOs                                         | 27 | 158 | 185 | 442  | 442  | 884  | 3 | 0.90 | 0.95 | 306.65 | 1 | 174 |
| Pan American Health Organization                | 23 | 44  | 67  | 318  | 318  | 636  | 3 | 0.41 | 0.52 | 28.46  | 2 | 162 |
| UNAIDS                                          | 30 | 133 | 163 | 612  | 612  | 1224 | 3 | 0.73 | 0.87 | 198.05 | 1 | 160 |
| UNFPA                                           | 30 | 141 | 171 | 1630 | 1630 | 3260 | 3 | 0.79 | 0.90 | 226.79 | 0 | 160 |
| UNICEF                                          | 30 | 146 | 176 | 1913 | 1913 | 3826 | 3 | 0.83 | 0.92 | 250.51 | 1 | 160 |
| UNITAID                                         | 9  | 2   | 11  | 14   | 14   | 28   | 1 | 1.00 | 1.00 | 0.28   | 1 | 187 |
| US Foundations                                  | 1  | 164 | 165 | 164  | 164  | 328  | 3 | 0.92 | 0.96 | 23.90  | 1 | 210 |
| World Bank                                      | 21 | 129 | 150 | 1134 | 1134 | 2268 | 3 | 0.71 | 0.85 | 32.25  | 0 | 176 |
| WB_IBRD                                         | 20 | 153 | 173 | 1369 | 1369 | 2738 | 3 | 0.84 | 0.93 | 247.82 | 0 | 169 |
| WB_IDA                                          | 27 | 117 | 144 | 2596 | 2596 | 5192 | 3 | 0.64 | 0.81 | 163.51 | 3 | 160 |
| WHO                                             | 29 | 154 | 183 | 2476 | 2476 | 4952 | 3 | 0.90 | 0.95 | 314.53 | 0 | 160 |
| Corporate Donations                             | 0  | 2   | 2   | 0    | 2    | 2    | 4 | 0.48 | 0.49 | 0.00   | 1 | 211 |
| Debt Repayments                                 | 0  | 2   | 2   | 0    | 173  | 173  | 4 | 0.47 | 0.48 | 0.00   | 3 | 212 |
| Non-OECD DAC Countries                          | 0  | 17  | 17  | 0    | 710  | 710  | 2 | 0.52 | 0.55 | 0.00   | 2 | 213 |
| Other                                           | 0  | 11  | 11  | 0    | 285  | 285  | 3 | 0.52 | 0.53 | 0.00   | 2 | 214 |
| Other OECD DAC Countries                        | 0  | 8   | 8   | 0    | 220  | 220  | 3 | 0.51 | 0.52 | 0.00   | 2 | 215 |
| Private Other                                   | 0  | 14  | 14  | 0    | 941  | 941  | 3 | 0.52 | 0.54 | 0.00   | 1 | 216 |
| Unallocable                                     | 0  | 4   | 4   | 0    | 4    | 4    | 4 | 0.46 | 0.49 | 0.00   | 1 | 217 |
| Afghanistan                                     | 40 | 0   | 40  | 275  | 0    | 275  | 0 | 0.00 | 0.00 | 0.00   | 0 | 134 |
| Albania                                         | 34 | 0   | 34  | 190  | 0    | 190  | 0 | 0.00 | 0.00 | 0.00   | 3 | 122 |
| Algeria                                         | 36 | 0   | 36  | 138  | 0    | 138  | 0 | 0.00 | 0.00 | 0.00   | 2 | 3   |
| Angola                                          | 39 | 0   | 39  | 279  | 0    | 279  | 0 | 0.00 | 0.00 | 0.00   | 1 | 21  |
| Anguilla                                        | 3  | 0   | 3   | 3    | 0    | 3    | 0 | 0.00 | 0.00 | 0.00   | 2 | 170 |
| Antigua and Barbuda                             | 19 | 0   | 19  | 65   | 0    | 65   | 0 | 0.00 | 0.00 | 0.00   | 2 | 87  |
| Argentina                                       | 34 | 0   | 34  | 118  | 0    | 118  | 0 | 0.00 | 0.00 | 0.00   | 2 | 113 |
| Armenia                                         | 36 | 0   | 36  | 218  | 0    | 218  | 0 | 0.00 | 0.00 | 0.00   | 3 | 75  |
| Azerbaijan                                      | 36 | 0   | 36  | 199  | 0    | 199  | 0 | 0.00 | 0.00 | 0.00   | 3 | 74  |
| Bahrain                                         | 1  | 0   | 1   | 1    | 0    | 1    | 0 | 0.00 | 0.00 | 0.00   | 0 | 190 |
| Bangladesh                                      | 39 | 0   | 39  | 271  | 0    | 271  | 0 | 0.00 | 0.00 | 0.00   | 0 | 135 |
| Barbados                                        | 6  | 0   | 6   | 47   | 0    | 47   | 0 | 0.00 | 0.00 | 0.00   | 2 | 107 |

|                                  |    |   |    |     |   |     |   |      |      |      |   |     |
|----------------------------------|----|---|----|-----|---|-----|---|------|------|------|---|-----|
| Belarus                          | 30 | 0 | 30 | 119 | 0 | 119 | 0 | 0.00 | 0.00 | 0.00 | 2 | 144 |
| Belize                           | 33 | 0 | 33 | 119 | 0 | 119 | 0 | 0.00 | 0.00 | 0.00 | 2 | 94  |
| Benin                            | 39 | 0 | 39 | 273 | 0 | 273 | 0 | 0.00 | 0.00 | 0.00 | 1 | 43  |
| Bhutan                           | 34 | 0 | 34 | 163 | 0 | 163 | 0 | 0.00 | 0.00 | 0.00 | 3 | 70  |
| Bolivia                          | 38 | 0 | 38 | 180 | 0 | 180 | 0 | 0.00 | 0.00 | 0.00 | 2 | 108 |
| Bosnia and Herzegovina           | 35 | 0 | 35 | 182 | 0 | 182 | 0 | 0.00 | 0.00 | 0.00 | 3 | 121 |
| Botswana                         | 39 | 0 | 39 | 210 | 0 | 210 | 0 | 0.00 | 0.00 | 0.00 | 0 | 18  |
| Brazil                           | 37 | 0 | 37 | 131 | 0 | 131 | 0 | 0.00 | 0.00 | 0.00 | 2 | 117 |
| Bulgaria                         | 5  | 0 | 5  | 34  | 0 | 34  | 0 | 0.00 | 0.00 | 0.00 | 2 | 156 |
| Burkina Faso                     | 39 | 0 | 39 | 280 | 0 | 280 | 0 | 0.00 | 0.00 | 0.00 | 1 | 50  |
| Burundi                          | 39 | 0 | 39 | 264 | 0 | 264 | 0 | 0.00 | 0.00 | 0.00 | 1 | 19  |
| Cambodia                         | 37 | 0 | 37 | 266 | 0 | 266 | 0 | 0.00 | 0.00 | 0.00 | 0 | 130 |
| Cameroon                         | 39 | 0 | 39 | 277 | 0 | 277 | 0 | 0.00 | 0.00 | 0.00 | 1 | 37  |
| Cape Verde                       | 24 | 0 | 24 | 117 | 0 | 117 | 0 | 0.00 | 0.00 | 0.00 | 3 | 12  |
| Central African Republic         | 39 | 0 | 39 | 259 | 0 | 259 | 0 | 0.00 | 0.00 | 0.00 | 1 | 14  |
| Chad                             | 39 | 0 | 39 | 266 | 0 | 266 | 0 | 0.00 | 0.00 | 0.00 | 1 | 29  |
| Chile                            | 34 | 0 | 34 | 112 | 0 | 112 | 0 | 0.00 | 0.00 | 0.00 | 2 | 102 |
| Christmas Island                 | 1  | 0 | 1  | 1   | 0 | 1   | 0 | 0.00 | 0.00 | 0.00 | 1 | 209 |
| Colombia                         | 36 | 0 | 36 | 126 | 0 | 126 | 0 | 0.00 | 0.00 | 0.00 | 2 | 118 |
| Comoros                          | 39 | 0 | 39 | 223 | 0 | 223 | 0 | 0.00 | 0.00 | 0.00 | 3 | 5   |
| Congo                            | 39 | 0 | 39 | 249 | 0 | 249 | 0 | 0.00 | 0.00 | 0.00 | 1 | 7   |
| Cook Islands                     | 9  | 0 | 9  | 49  | 0 | 49  | 0 | 0.00 | 0.00 | 0.00 | 2 | 149 |
| Costa Rica                       | 35 | 0 | 35 | 131 | 0 | 131 | 0 | 0.00 | 0.00 | 0.00 | 2 | 97  |
| Cote d'Ivoire                    | 39 | 0 | 39 | 276 | 0 | 276 | 0 | 0.00 | 0.00 | 0.00 | 1 | 20  |
| Croatia                          | 22 | 0 | 22 | 61  | 0 | 61  | 0 | 0.00 | 0.00 | 0.00 | 2 | 153 |
| Cuba                             | 36 | 0 | 36 | 166 | 0 | 166 | 0 | 0.00 | 0.00 | 0.00 | 2 | 92  |
| Czech Republic                   | 2  | 0 | 2  | 2   | 0 | 2   | 0 | 0.00 | 0.00 | 0.00 | 1 | 173 |
| Democratic Republic of the Congo | 37 | 0 | 37 | 199 | 0 | 199 | 0 | 0.00 | 0.00 | 0.00 | 1 | 46  |
| Djibouti                         | 39 | 0 | 39 | 247 | 0 | 247 | 0 | 0.00 | 0.00 | 0.00 | 1 | 25  |
| Dominica                         | 26 | 0 | 26 | 83  | 0 | 83  | 0 | 0.00 | 0.00 | 0.00 | 2 | 89  |
| Dominican Republic               | 37 | 0 | 37 | 159 | 0 | 159 | 0 | 0.00 | 0.00 | 0.00 | 2 | 112 |
| Ecuador                          | 37 | 0 | 37 | 128 | 0 | 128 | 0 | 0.00 | 0.00 | 0.00 | 2 | 106 |
| Egypt                            | 39 | 0 | 39 | 254 | 0 | 254 | 0 | 0.00 | 0.00 | 0.00 | 1 | 35  |
| El Salvador                      | 37 | 0 | 37 | 161 | 0 | 161 | 0 | 0.00 | 0.00 | 0.00 | 2 | 100 |
| Equatorial Guinea                | 38 | 0 | 38 | 197 | 0 | 197 | 0 | 0.00 | 0.00 | 0.00 | 3 | 51  |
| Eritrea                          | 39 | 0 | 39 | 255 | 0 | 255 | 0 | 0.00 | 0.00 | 0.00 | 1 | 16  |
| Estonia                          | 5  | 0 | 5  | 31  | 0 | 31  | 0 | 0.00 | 0.00 | 0.00 | 2 | 154 |
| Ethiopia                         | 39 | 0 | 39 | 288 | 0 | 288 | 0 | 0.00 | 0.00 | 0.00 | 1 | 41  |
| Federated States of Micronesia   | 24 | 0 | 24 | 64  | 0 | 64  | 0 | 0.00 | 0.00 | 0.00 | 2 | 64  |
| Fiji                             | 26 | 0 | 26 | 81  | 0 | 81  | 0 | 0.00 | 0.00 | 0.00 | 2 | 139 |
| Gabon                            | 38 | 0 | 38 | 210 | 0 | 210 | 0 | 0.00 | 0.00 | 0.00 | 0 | 47  |
| Georgia                          | 36 | 0 | 36 | 245 | 0 | 245 | 0 | 0.00 | 0.00 | 0.00 | 3 | 81  |
| Ghana                            | 39 | 0 | 39 | 284 | 0 | 284 | 0 | 0.00 | 0.00 | 0.00 | 1 | 40  |
| Global                           | 43 | 0 | 43 | 260 | 0 | 260 | 0 | 0.00 | 0.00 | 0.00 | 1 | 6   |



|                  |    |   |    |     |   |     |   |      |      |      |   |     |
|------------------|----|---|----|-----|---|-----|---|------|------|------|---|-----|
| Grenada          | 30 | 0 | 30 | 85  | 0 | 85  | 0 | 0.00 | 0.00 | 0.00 | 2 | 90  |
| Guatemala        | 37 | 0 | 37 | 170 | 0 | 170 | 0 | 0.00 | 0.00 | 0.00 | 2 | 115 |
| Guinea           | 39 | 0 | 39 | 270 | 0 | 270 | 0 | 0.00 | 0.00 | 0.00 | 1 | 31  |
| Guinea-Bissau    | 39 | 0 | 39 | 259 | 0 | 259 | 0 | 0.00 | 0.00 | 0.00 | 1 | 30  |
| Guyana           | 34 | 0 | 34 | 156 | 0 | 156 | 0 | 0.00 | 0.00 | 0.00 | 2 | 98  |
| Haiti            | 38 | 0 | 38 | 234 | 0 | 234 | 0 | 0.00 | 0.00 | 0.00 | 2 | 111 |
| Honduras         | 38 | 0 | 38 | 186 | 0 | 186 | 0 | 0.00 | 0.00 | 0.00 | 2 | 109 |
| Hungary          | 3  | 0 | 3  | 3   | 0 | 3   | 0 | 0.00 | 0.00 | 0.00 | 1 | 166 |
| India            | 39 | 0 | 39 | 274 | 0 | 274 | 0 | 0.00 | 0.00 | 0.00 | 0 | 136 |
| Indonesia        | 39 | 0 | 39 | 265 | 0 | 265 | 0 | 0.00 | 0.00 | 0.00 | 0 | 132 |
| Iran             | 36 | 0 | 36 | 142 | 0 | 142 | 0 | 0.00 | 0.00 | 0.00 | 2 | 73  |
| Iraq             | 37 | 0 | 37 | 195 | 0 | 195 | 0 | 0.00 | 0.00 | 0.00 | 0 | 76  |
| Jamaica          | 36 | 0 | 36 | 143 | 0 | 143 | 0 | 0.00 | 0.00 | 0.00 | 2 | 103 |
| Jordan           | 37 | 0 | 37 | 198 | 0 | 198 | 0 | 0.00 | 0.00 | 0.00 | 0 | 80  |
| Kazakhstan       | 37 | 0 | 37 | 212 | 0 | 212 | 0 | 0.00 | 0.00 | 0.00 | 3 | 78  |
| Kenya            | 39 | 0 | 39 | 285 | 0 | 285 | 0 | 0.00 | 0.00 | 0.00 | 1 | 48  |
| Kiribati         | 28 | 0 | 28 | 98  | 0 | 98  | 0 | 0.00 | 0.00 | 0.00 | 2 | 58  |
| Kosovo           | 32 | 0 | 32 | 142 | 0 | 142 | 0 | 0.00 | 0.00 | 0.00 | 3 | 143 |
| Kyrgyzstan       | 36 | 0 | 36 | 225 | 0 | 225 | 0 | 0.00 | 0.00 | 0.00 | 3 | 77  |
| Laos             | 37 | 0 | 37 | 258 | 0 | 258 | 0 | 0.00 | 0.00 | 0.00 | 0 | 127 |
| Latvia           | 5  | 0 | 5  | 7   | 0 | 7   | 0 | 0.00 | 0.00 | 0.00 | 1 | 157 |
| Lebanon          | 38 | 0 | 38 | 162 | 0 | 162 | 0 | 0.00 | 0.00 | 0.00 | 0 | 68  |
| Lesotho          | 39 | 0 | 39 | 253 | 0 | 253 | 0 | 0.00 | 0.00 | 0.00 | 1 | 22  |
| Liberia          | 39 | 0 | 39 | 269 | 0 | 269 | 0 | 0.00 | 0.00 | 0.00 | 1 | 33  |
| Libya            | 33 | 0 | 33 | 123 | 0 | 123 | 0 | 0.00 | 0.00 | 0.00 | 0 | 2   |
| Lithuania        | 5  | 0 | 5  | 7   | 0 | 7   | 0 | 0.00 | 0.00 | 0.00 | 1 | 158 |
| Macedonia        | 30 | 0 | 30 | 131 | 0 | 131 | 0 | 0.00 | 0.00 | 0.00 | 2 | 145 |
| Madagascar       | 39 | 0 | 39 | 276 | 0 | 276 | 0 | 0.00 | 0.00 | 0.00 | 1 | 38  |
| Malawi           | 39 | 0 | 39 | 277 | 0 | 277 | 0 | 0.00 | 0.00 | 0.00 | 1 | 44  |
| Malaysia         | 31 | 0 | 31 | 132 | 0 | 132 | 0 | 0.00 | 0.00 | 0.00 | 0 | 140 |
| Maldives         | 32 | 0 | 32 | 110 | 0 | 110 | 0 | 0.00 | 0.00 | 0.00 | 3 | 66  |
| Mali             | 40 | 0 | 40 | 282 | 0 | 282 | 0 | 0.00 | 0.00 | 0.00 | 1 | 45  |
| Malta            | 1  | 0 | 1  | 1   | 0 | 1   | 0 | 0.00 | 0.00 | 0.00 | 0 | 180 |
| Marshall Islands | 21 | 0 | 21 | 76  | 0 | 76  | 0 | 0.00 | 0.00 | 0.00 | 0 | 138 |
| Mauritania       | 39 | 0 | 39 | 259 | 0 | 259 | 0 | 0.00 | 0.00 | 0.00 | 1 | 34  |
| Mauritius        | 33 | 0 | 33 | 112 | 0 | 112 | 0 | 0.00 | 0.00 | 0.00 | 2 | 0   |
| Mayotte          | 1  | 0 | 1  | 1   | 0 | 1   | 0 | 0.00 | 0.00 | 0.00 | 0 | 191 |
| Mexico           | 37 | 0 | 37 | 161 | 0 | 161 | 0 | 0.00 | 0.00 | 0.00 | 2 | 114 |
| Moldova          | 33 | 0 | 33 | 185 | 0 | 185 | 0 | 0.00 | 0.00 | 0.00 | 3 | 125 |
| Mongolia         | 37 | 0 | 37 | 213 | 0 | 213 | 0 | 0.00 | 0.00 | 0.00 | 0 | 124 |
| Montenegro       | 31 | 0 | 31 | 137 | 0 | 137 | 0 | 0.00 | 0.00 | 0.00 | 3 | 142 |
| Montserrat       | 25 | 0 | 25 | 72  | 0 | 72  | 0 | 0.00 | 0.00 | 0.00 | 2 | 91  |
| Morocco          | 39 | 0 | 39 | 218 | 0 | 218 | 0 | 0.00 | 0.00 | 0.00 | 1 | 55  |
| Mozambique       | 39 | 0 | 39 | 288 | 0 | 288 | 0 | 0.00 | 0.00 | 0.00 | 1 | 36  |

|                                  |    |   |    |     |   |     |   |      |      |      |   |     |
|----------------------------------|----|---|----|-----|---|-----|---|------|------|------|---|-----|
| Myanmar                          | 37 | 0 | 37 | 258 | 0 | 258 | 0 | 0.00 | 0.00 | 0.00 | 0 | 131 |
| Namibia                          | 39 | 0 | 39 | 222 | 0 | 222 | 0 | 0.00 | 0.00 | 0.00 | 1 | 17  |
| Nauru                            | 19 | 0 | 19 | 52  | 0 | 52  | 0 | 0.00 | 0.00 | 0.00 | 2 | 59  |
| Nepal                            | 39 | 0 | 39 | 265 | 0 | 265 | 0 | 0.00 | 0.00 | 0.00 | 0 | 86  |
| Netherlands Antilles             | 2  | 0 | 2  | 12  | 0 | 12  | 0 | 0.00 | 0.00 | 0.00 | 0 | 177 |
| Nicaragua                        | 37 | 0 | 37 | 201 | 0 | 201 | 0 | 0.00 | 0.00 | 0.00 | 2 | 110 |
| Niger                            | 39 | 0 | 39 | 276 | 0 | 276 | 0 | 0.00 | 0.00 | 0.00 | 1 | 42  |
| Nigeria                          | 39 | 0 | 39 | 287 | 0 | 287 | 0 | 0.00 | 0.00 | 0.00 | 1 | 52  |
| Niue                             | 18 | 0 | 18 | 64  | 0 | 64  | 0 | 0.00 | 0.00 | 0.00 | 2 | 63  |
| North Korea                      | 32 | 0 | 32 | 127 | 0 | 127 | 0 | 0.00 | 0.00 | 0.00 | 2 | 72  |
| Northern Mariana Islands         | 2  | 0 | 2  | 2   | 0 | 2   | 0 | 0.00 | 0.00 | 0.00 | 2 | 197 |
| Oman                             | 5  | 0 | 5  | 5   | 0 | 5   | 0 | 0.00 | 0.00 | 0.00 | 1 | 164 |
| Pakistan                         | 39 | 0 | 39 | 273 | 0 | 273 | 0 | 0.00 | 0.00 | 0.00 | 0 | 137 |
| Palau                            | 18 | 0 | 18 | 50  | 0 | 50  | 0 | 0.00 | 0.00 | 0.00 | 2 | 62  |
| Palestine                        | 34 | 0 | 34 | 125 | 0 | 125 | 0 | 0.00 | 0.00 | 0.00 | 2 | 151 |
| Panama                           | 35 | 0 | 35 | 142 | 0 | 142 | 0 | 0.00 | 0.00 | 0.00 | 2 | 105 |
| Papua New Guinea                 | 32 | 0 | 32 | 138 | 0 | 138 | 0 | 0.00 | 0.00 | 0.00 | 0 | 128 |
| Paraguay                         | 36 | 0 | 36 | 116 | 0 | 116 | 0 | 0.00 | 0.00 | 0.00 | 2 | 95  |
| Peru                             | 37 | 0 | 37 | 131 | 0 | 131 | 0 | 0.00 | 0.00 | 0.00 | 2 | 104 |
| Philippines                      | 39 | 0 | 39 | 248 | 0 | 248 | 0 | 0.00 | 0.00 | 0.00 | 0 | 120 |
| Poland                           | 4  | 0 | 4  | 6   | 0 | 6   | 0 | 0.00 | 0.00 | 0.00 | 1 | 168 |
| Romania                          | 5  | 0 | 5  | 34  | 0 | 34  | 0 | 0.00 | 0.00 | 0.00 | 2 | 155 |
| Russia                           | 8  | 0 | 8  | 36  | 0 | 36  | 0 | 0.00 | 0.00 | 0.00 | 2 | 147 |
| Rwanda                           | 39 | 0 | 39 | 276 | 0 | 276 | 0 | 0.00 | 0.00 | 0.00 | 1 | 27  |
| Saint Helena                     | 33 | 0 | 33 | 130 | 0 | 130 | 0 | 0.00 | 0.00 | 0.00 | 0 | 10  |
| Saint Kitts and Nevis            | 8  | 0 | 8  | 47  | 0 | 47  | 0 | 0.00 | 0.00 | 0.00 | 2 | 152 |
| Saint Lucia                      | 33 | 0 | 33 | 107 | 0 | 107 | 0 | 0.00 | 0.00 | 0.00 | 2 | 93  |
| Saint Vincent and the Grenadines | 32 | 0 | 32 | 95  | 0 | 95  | 0 | 0.00 | 0.00 | 0.00 | 2 | 88  |
| Samoa                            | 26 | 0 | 26 | 106 | 0 | 106 | 0 | 0.00 | 0.00 | 0.00 | 3 | 65  |
| Sao Tome and Principe            | 38 | 0 | 38 | 230 | 0 | 230 | 0 | 0.00 | 0.00 | 0.00 | 3 | 4   |
| Saudi Arabia                     | 5  | 0 | 5  | 5   | 0 | 5   | 0 | 0.00 | 0.00 | 0.00 | 1 | 172 |
| Senegal                          | 39 | 0 | 39 | 283 | 0 | 283 | 0 | 0.00 | 0.00 | 0.00 | 1 | 39  |
| Serbia                           | 35 | 0 | 35 | 167 | 0 | 167 | 0 | 0.00 | 0.00 | 0.00 | 2 | 146 |
| Seychelles                       | 33 | 0 | 33 | 97  | 0 | 97  | 0 | 0.00 | 0.00 | 0.00 | 2 | 1   |
| Sierra Leone                     | 39 | 0 | 39 | 270 | 0 | 270 | 0 | 0.00 | 0.00 | 0.00 | 1 | 49  |
| Slovakia                         | 2  | 0 | 2  | 2   | 0 | 2   | 0 | 0.00 | 0.00 | 0.00 | 1 | 165 |
| Slovenia                         | 8  | 0 | 8  | 8   | 0 | 8   | 0 | 0.00 | 0.00 | 0.00 | 0 | 159 |
| Solomon Islands                  | 26 | 0 | 26 | 128 | 0 | 128 | 0 | 0.00 | 0.00 | 0.00 | 3 | 82  |
| Somalia                          | 39 | 0 | 39 | 252 | 0 | 252 | 0 | 0.00 | 0.00 | 0.00 | 1 | 15  |
| South Africa                     | 39 | 0 | 39 | 260 | 0 | 260 | 0 | 0.00 | 0.00 | 0.00 | 0 | 24  |
| South Korea                      | 7  | 0 | 7  | 7   | 0 | 7   | 0 | 0.00 | 0.00 | 0.00 | 0 | 167 |
| South Sudan                      | 39 | 0 | 39 | 245 | 0 | 245 | 0 | 0.00 | 0.00 | 0.00 | 1 | 13  |
| Sri Lanka                        | 37 | 0 | 37 | 231 | 0 | 231 | 0 | 0.00 | 0.00 | 0.00 | 0 | 126 |
| Sudan                            | 39 | 0 | 39 | 272 | 0 | 272 | 0 | 0.00 | 0.00 | 0.00 | 1 | 26  |

|                           |    |   |    |     |   |     |   |      |      |      |   |     |
|---------------------------|----|---|----|-----|---|-----|---|------|------|------|---|-----|
| Suriname                  | 34 | 0 | 34 | 107 | 0 | 107 | 0 | 0.00 | 0.00 | 0.00 | 2 | 96  |
| Swaziland                 | 38 | 0 | 38 | 201 | 0 | 201 | 0 | 0.00 | 0.00 | 0.00 | 0 | 11  |
| Syria                     | 38 | 0 | 38 | 195 | 0 | 195 | 0 | 0.00 | 0.00 | 0.00 | 0 | 67  |
| Tajikistan                | 37 | 0 | 37 | 248 | 0 | 248 | 0 | 0.00 | 0.00 | 0.00 | 0 | 83  |
| Tanzania                  | 39 | 0 | 39 | 285 | 0 | 285 | 0 | 0.00 | 0.00 | 0.00 | 1 | 53  |
| Thailand                  | 38 | 0 | 38 | 193 | 0 | 193 | 0 | 0.00 | 0.00 | 0.00 | 0 | 85  |
| The Gambia                | 39 | 0 | 39 | 248 | 0 | 248 | 0 | 0.00 | 0.00 | 0.00 | 1 | 28  |
| Timor-Leste               | 37 | 0 | 37 | 231 | 0 | 231 | 0 | 0.00 | 0.00 | 0.00 | 0 | 79  |
| Togo                      | 39 | 0 | 39 | 255 | 0 | 255 | 0 | 0.00 | 0.00 | 0.00 | 1 | 9   |
| Tokelau                   | 13 | 0 | 13 | 18  | 0 | 18  | 0 | 0.00 | 0.00 | 0.00 | 2 | 148 |
| Tonga                     | 23 | 0 | 23 | 99  | 0 | 99  | 0 | 0.00 | 0.00 | 0.00 | 3 | 60  |
| Trinidad and Tobago       | 11 | 0 | 11 | 52  | 0 | 52  | 0 | 0.00 | 0.00 | 0.00 | 2 | 116 |
| Tunisia                   | 37 | 0 | 37 | 172 | 0 | 172 | 0 | 0.00 | 0.00 | 0.00 | 2 | 8   |
| Turkey                    | 29 | 0 | 29 | 142 | 0 | 142 | 0 | 0.00 | 0.00 | 0.00 | 0 | 141 |
| Turkmenistan              | 36 | 0 | 36 | 158 | 0 | 158 | 0 | 0.00 | 0.00 | 0.00 | 3 | 69  |
| Turks and Caicos Islands  | 2  | 0 | 2  | 2   | 0 | 2   | 0 | 0.00 | 0.00 | 0.00 | 2 | 182 |
| Tuvalu                    | 21 | 0 | 21 | 93  | 0 | 93  | 0 | 0.00 | 0.00 | 0.00 | 3 | 61  |
| Uganda                    | 39 | 0 | 39 | 286 | 0 | 286 | 0 | 0.00 | 0.00 | 0.00 | 1 | 54  |
| Ukraine                   | 32 | 0 | 32 | 181 | 0 | 181 | 0 | 0.00 | 0.00 | 0.00 | 0 | 123 |
| Unallocated/Unspecified   | 45 | 0 | 45 | 357 | 0 | 357 | 0 | 0.00 | 0.00 | 0.00 | 1 | 56  |
| Uruguay                   | 31 | 0 | 31 | 78  | 0 | 78  | 0 | 0.00 | 0.00 | 0.00 | 2 | 101 |
| Uzbekistan                | 35 | 0 | 35 | 253 | 0 | 253 | 0 | 0.00 | 0.00 | 0.00 | 0 | 129 |
| Vanuatu                   | 25 | 0 | 25 | 76  | 0 | 76  | 0 | 0.00 | 0.00 | 0.00 | 2 | 71  |
| Venezuela                 | 34 | 0 | 34 | 106 | 0 | 106 | 0 | 0.00 | 0.00 | 0.00 | 2 | 99  |
| Vietnam                   | 39 | 0 | 39 | 270 | 0 | 270 | 0 | 0.00 | 0.00 | 0.00 | 0 | 133 |
| Wallis and Futuna Islands | 18 | 0 | 18 | 27  | 0 | 27  | 0 | 0.00 | 0.00 | 0.00 | 0 | 150 |
| Yemen                     | 37 | 0 | 37 | 249 | 0 | 249 | 0 | 0.00 | 0.00 | 0.00 | 3 | 84  |
| Zambia                    | 39 | 0 | 39 | 283 | 0 | 283 | 0 | 0.00 | 0.00 | 0.00 | 1 | 32  |
| Zimbabwe                  | 39 | 0 | 39 | 275 | 0 | 275 | 0 | 0.00 | 0.00 | 0.00 | 1 | 23  |

### Twitter network analysis statistics report

| Label          | indegree | outdegree | Degree | weighted indegree | weighted outdegree | Weighted Degree | Eccentricity | closenesscentrality | harmonicclosenesscentrality | betweennesscentrality | modularity_class | strongcompnum |
|----------------|----------|-----------|--------|-------------------|--------------------|-----------------|--------------|---------------------|-----------------------------|-----------------------|------------------|---------------|
| United States  | 0        | 8         | 8      | 0                 | 30                 | 30              | 3            | 0.38                | 0.44                        | 0.00                  | 0                | 67            |
| United Kingdom | 0        | 8         | 8      | 0                 | 29                 | 29              | 3            | 0.38                | 0.44                        | 0.00                  | 1                | 68            |
| BMGF           | 0        | 8         | 8      | 0                 | 35                 | 35              | 3            | 0.38                | 0.44                        | 0.00                  | 0                | 69            |
| WHO            | 3        | 9         | 12     | 17                | 29                 | 46              | 2            | 0.54                | 0.58                        | 23.50                 | 0                | 66            |
| World Bank     | 3        | 8         | 11     | 16                | 31                 | 47              | 2            | 0.54                | 0.58                        | 19.65                 | 1                | 65            |
| UNAIDS         | 3        | 9         | 12     | 8                 | 18                 | 26              | 2            | 0.54                | 0.58                        | 23.50                 | 0                | 64            |

|                   |   |    |    |    |    |    |   |      |      |       |   |    |
|-------------------|---|----|----|----|----|----|---|------|------|-------|---|----|
| UNFPA             | 3 | 8  | 11 | 10 | 20 | 30 | 2 | 0.54 | 0.58 | 19.65 | 1 | 63 |
| UNICEF            | 3 | 9  | 12 | 13 | 28 | 41 | 2 | 0.54 | 0.58 | 23.50 | 1 | 62 |
| UNITAID           | 3 | 8  | 11 | 7  | 21 | 28 | 2 | 0.54 | 0.58 | 20.21 | 4 | 61 |
| GAVI              | 3 | 9  | 12 | 9  | 24 | 33 | 2 | 0.54 | 0.58 | 23.50 | 4 | 60 |
| GFATM             | 3 | 9  | 12 | 14 | 30 | 44 | 2 | 0.54 | 0.58 | 23.50 | 3 | 59 |
| Oxfam             | 8 | 10 | 18 | 28 | 10 | 38 | 1 | 1.00 | 1.00 | 40.64 | 1 | 58 |
| CDC               | 8 | 10 | 18 | 19 | 10 | 29 | 1 | 1.00 | 1.00 | 72.46 | 2 | 56 |
| EU CDC            | 6 | 10 | 16 | 13 | 10 | 23 | 1 | 1.00 | 1.00 | 62.06 | 3 | 51 |
| NIH               | 8 | 10 | 18 | 13 | 10 | 23 | 1 | 1.00 | 1.00 | 87.07 | 4 | 43 |
| FAO               | 7 | 9  | 16 | 13 | 9  | 22 | 1 | 1.00 | 1.00 | 67.06 | 1 | 35 |
| UNDP              | 8 | 10 | 18 | 33 | 10 | 43 | 1 | 1.00 | 1.00 | 41.00 | 1 | 28 |
| MSF               | 8 | 10 | 18 | 32 | 10 | 42 | 1 | 1.00 | 1.00 | 56.78 | 3 | 23 |
| PATH              | 8 | 10 | 18 | 30 | 10 | 40 | 1 | 1.00 | 1.00 | 59.94 | 4 | 17 |
| Save the Children | 8 | 9  | 17 | 20 | 9  | 29 | 1 | 1.00 | 1.00 | 46.99 | 1 | 9  |
| Access            | 1 | 0  | 1  | 1  | 0  | 1  | 0 | 0.00 | 0.00 | 0.00  | 4 | 16 |
| Africa            | 7 | 0  | 7  | 7  | 0  | 7  | 0 | 0.00 | 0.00 | 0.00  | 1 | 8  |
| Agriculture       | 1 | 0  | 1  | 1  | 0  | 1  | 0 | 0.00 | 0.00 | 0.00  | 1 | 34 |
| Biodiversity      | 1 | 0  | 1  | 1  | 0  | 1  | 0 | 0.00 | 0.00 | 0.00  | 1 | 33 |
| Breastfeeding     | 1 | 0  | 1  | 1  | 0  | 1  | 0 | 0.00 | 0.00 | 0.00  | 4 | 15 |
| Cancer            | 2 | 0  | 2  | 2  | 0  | 2  | 0 | 0.00 | 0.00 | 0.00  | 4 | 14 |
| Child Marriage    | 0 | 0  | 0  | 0  | 0  | 0  | 0 | 0.00 | 0.00 | 0.00  | 5 | 70 |
| Children          | 5 | 0  | 5  | 5  | 0  | 5  | 0 | 0.00 | 0.00 | 0.00  | 1 | 7  |
| Cholera           | 1 | 0  | 1  | 1  | 0  | 1  | 0 | 0.00 | 0.00 | 0.00  | 3 | 22 |
| Climate Change    | 3 | 0  | 3  | 3  | 0  | 3  | 0 | 0.00 | 0.00 | 0.00  | 1 | 27 |
| Development       | 0 | 0  | 0  | 0  | 0  | 0  | 0 | 0.00 | 0.00 | 0.00  | 6 | 71 |
| Diarrhea          | 1 | 0  | 1  | 1  | 0  | 1  | 0 | 0.00 | 0.00 | 0.00  | 2 | 55 |
| Discrimination    | 0 | 0  | 0  | 0  | 0  | 0  | 0 | 0.00 | 0.00 | 0.00  | 7 | 72 |
| Donations         | 1 | 0  | 1  | 1  | 0  | 1  | 0 | 0.00 | 0.00 | 0.00  | 1 | 6  |
| E. Coli           | 1 | 0  | 1  | 1  | 0  | 1  | 0 | 0.00 | 0.00 | 0.00  | 2 | 54 |
| Ebola             | 4 | 0  | 4  | 4  | 0  | 4  | 0 | 0.00 | 0.00 | 0.00  | 3 | 13 |
| Education         | 2 | 0  | 2  | 2  | 0  | 2  | 0 | 0.00 | 0.00 | 0.00  | 1 | 5  |
| FGM               | 1 | 0  | 1  | 1  | 0  | 1  | 0 | 0.00 | 0.00 | 0.00  | 1 | 26 |
| Families          | 1 | 0  | 1  | 1  | 0  | 1  | 0 | 0.00 | 0.00 | 0.00  | 1 | 32 |
| Family Planning   | 0 | 0  | 0  | 0  | 0  | 0  | 0 | 0.00 | 0.00 | 0.00  | 8 | 73 |
| Farmers           | 1 | 0  | 1  | 1  | 0  | 1  | 0 | 0.00 | 0.00 | 0.00  | 1 | 31 |
| Fisheries         | 1 | 0  | 1  | 1  | 0  | 1  | 0 | 0.00 | 0.00 | 0.00  | 1 | 30 |
| Food Security     | 4 | 0  | 4  | 4  | 0  | 4  | 0 | 0.00 | 0.00 | 0.00  | 1 | 4  |
| Forests           | 1 | 0  | 1  | 1  | 0  | 1  | 0 | 0.00 | 0.00 | 0.00  | 1 | 29 |
| Funding           | 1 | 0  | 1  | 1  | 0  | 1  | 0 | 0.00 | 0.00 | 0.00  | 4 | 42 |
| HIV/AIDS          | 4 | 0  | 4  | 4  | 0  | 4  | 0 | 0.00 | 0.00 | 0.00  | 1 | 21 |
| Heart Disease     | 1 | 0  | 1  | 1  | 0  | 1  | 0 | 0.00 | 0.00 | 0.00  | 4 | 41 |
| Hepatitis         | 1 | 0  | 1  | 1  | 0  | 1  | 0 | 0.00 | 0.00 | 0.00  | 3 | 50 |
| Human Rights      | 0 | 0  | 0  | 0  | 0  | 0  | 0 | 0.00 | 0.00 | 0.00  | 9 | 74 |

|                  |   |   |   |   |   |   |   |      |      |      |    |    |
|------------------|---|---|---|---|---|---|---|------|------|------|----|----|
| Humanitarian Aid | 3 | 0 | 3 | 3 | 0 | 3 | 0 | 0.00 | 0.00 | 0.00 | 3  | 3  |
| Influenza        | 2 | 0 | 2 | 2 | 0 | 2 | 0 | 0.00 | 0.00 | 0.00 | 2  | 49 |
| Innovation       | 1 | 0 | 1 | 1 | 0 | 1 | 0 | 0.00 | 0.00 | 0.00 | 4  | 12 |
| Malaria          | 3 | 0 | 3 | 3 | 0 | 3 | 0 | 0.00 | 0.00 | 0.00 | 1  | 11 |
| Measles          | 2 | 0 | 2 | 2 | 0 | 2 | 0 | 0.00 | 0.00 | 0.00 | 3  | 48 |
| Mothers          | 0 | 0 | 0 | 0 | 0 | 0 | 0 | 0.00 | 0.00 | 0.00 | 10 | 75 |
| News             | 1 | 0 | 1 | 1 | 0 | 1 | 0 | 0.00 | 0.00 | 0.00 | 4  | 40 |
| Nutrition        | 0 | 0 | 0 | 0 | 0 | 0 | 0 | 0.00 | 0.00 | 0.00 | 11 | 76 |
| Online           | 0 | 0 | 0 | 0 | 0 | 0 | 0 | 0.00 | 0.00 | 0.00 | 12 | 77 |
| Outbreaks        | 1 | 0 | 1 | 1 | 0 | 1 | 0 | 0.00 | 0.00 | 0.00 | 3  | 47 |
| Pneumonia        | 1 | 0 | 1 | 1 | 0 | 1 | 0 | 0.00 | 0.00 | 0.00 | 1  | 57 |
| Pneumonia        | 2 | 0 | 2 | 2 | 0 | 2 | 0 | 0.00 | 0.00 | 0.00 | 1  | 2  |
| Polio            | 0 | 0 | 0 | 0 | 0 | 0 | 0 | 0.00 | 0.00 | 0.00 | 13 | 78 |
| Poverty          | 0 | 0 | 0 | 0 | 0 | 0 | 0 | 0.00 | 0.00 | 0.00 | 14 | 79 |
| Prevention       | 1 | 0 | 1 | 1 | 0 | 1 | 0 | 0.00 | 0.00 | 0.00 | 2  | 53 |
| Rare Disease     | 1 | 0 | 1 | 1 | 0 | 1 | 0 | 0.00 | 0.00 | 0.00 | 4  | 39 |
| Refugees         | 3 | 0 | 3 | 3 | 0 | 3 | 0 | 0.00 | 0.00 | 0.00 | 3  | 1  |
| Report           | 1 | 0 | 1 | 1 | 0 | 1 | 0 | 0.00 | 0.00 | 0.00 | 3  | 46 |
| Research         | 1 | 0 | 1 | 1 | 0 | 1 | 0 | 0.00 | 0.00 | 0.00 | 4  | 38 |
| Sanitation       | 0 | 0 | 0 | 0 | 0 | 0 | 0 | 0.00 | 0.00 | 0.00 | 15 | 80 |
| Schools          | 1 | 0 | 1 | 1 | 0 | 1 | 0 | 0.00 | 0.00 | 0.00 | 1  | 0  |
| South America    | 0 | 0 | 0 | 0 | 0 | 0 | 0 | 0.00 | 0.00 | 0.00 | 16 | 81 |
| Stress           | 1 | 0 | 1 | 1 | 0 | 1 | 0 | 0.00 | 0.00 | 0.00 | 4  | 37 |
| Surveillance     | 1 | 0 | 1 | 1 | 0 | 1 | 0 | 0.00 | 0.00 | 0.00 | 3  | 45 |
| Testing          | 0 | 0 | 0 | 0 | 0 | 0 | 0 | 0.00 | 0.00 | 0.00 | 17 | 82 |
| Treatment        | 1 | 0 | 1 | 1 | 0 | 1 | 0 | 0.00 | 0.00 | 0.00 | 3  | 20 |
| Tuberculosis     | 2 | 0 | 2 | 2 | 0 | 2 | 0 | 0.00 | 0.00 | 0.00 | 3  | 19 |
| Vaccines         | 2 | 0 | 2 | 2 | 0 | 2 | 0 | 0.00 | 0.00 | 0.00 | 2  | 10 |
| Veterans         | 1 | 0 | 1 | 1 | 0 | 1 | 0 | 0.00 | 0.00 | 0.00 | 4  | 36 |
| Violence         | 1 | 0 | 1 | 1 | 0 | 1 | 0 | 0.00 | 0.00 | 0.00 | 3  | 18 |
| Water            | 3 | 0 | 3 | 3 | 0 | 3 | 0 | 0.00 | 0.00 | 0.00 | 2  | 25 |
| West Nile        | 1 | 0 | 1 | 1 | 0 | 1 | 0 | 0.00 | 0.00 | 0.00 | 3  | 44 |
| Women            | 3 | 0 | 3 | 3 | 0 | 3 | 0 | 0.00 | 0.00 | 0.00 | 2  | 24 |
| Zika             | 1 | 0 | 1 | 1 | 0 | 1 | 0 | 0.00 | 0.00 | 0.00 | 2  | 52 |
